# Supplementary material
Source: PubMed Central journal article supplement (PMC9106855)
Supplement: NIHMS1759682-supplement-1759682_Sup_results.pdf [file NIHMS1759682-supplement-1759682_Sup_results.pdf]

## **These are result outputs for pheWAS of schizophrenia PRS in the UK Biobank**

|        |                                                                                                                   |
|--------|-------------------------------------------------------------------------------------------------------------------|
| Sheet1 | Results from the main analysis                                                                                    |
| Sheet2 | Results from the sensitivity analysis on inpatient diagnoses only                                                 |
| Sheet3 | Results from the sensitivity analysis adjusting for antipsychotic use in individuals with GP information          |
| Sheet4 | Results from the sensitivity analysis adjusting for antipsychotic use in individuals with any prescription record |

**Sheet 1 Results from the main analysis**

| phenotype | snp     | beta   | SE    | OR    | p        | n_cases | n_controls | description                                     | group                 |
|-----------|---------|--------|-------|-------|----------|---------|------------|-------------------------------------------------|-----------------------|
| 296.1     | PRS_PC1 | 0,369  | 0,028 | 1,447 | 1,39E-39 | 1323    | 324669     | Bipolar                                         | mental disorders      |
| 296       | PRS_PC1 | 0,246  | 0,020 | 1,278 | 8,56E-35 | 2623    | 323369     | Mood disorders                                  | mental disorders      |
| 316       | PRS_PC1 | 0,091  | 0,011 | 1,096 | 1,17E-16 | 8851    | 317141     | Substance addiction and disorders               | mental disorders      |
| 351       | PRS_PC1 | -0,054 | 0,007 | 0,947 | 1,05E-14 | 22987   | 303005     | Other peripheral nerve disorders                | neurological          |
| 496.2     | PRS_PC1 | 0,062  | 0,008 | 1,064 | 1,64E-14 | 17046   | 308946     | Chronic bronchitis                              | respiratory           |
| 564       | PRS_PC1 | 0,039  | 0,005 | 1,039 | 4,27E-14 | 46351   | 279641     | Functional digestive disorders                  | digestive             |
| 496.21    | PRS_PC1 | 0,061  | 0,008 | 1,063 | 5,22E-14 | 16707   | 309285     | Obstructive chronic bronchitis                  | respiratory           |
| 716       | PRS_PC1 | -0,043 | 0,006 | 0,958 | 1,16E-13 | 34687   | 291305     | Other arthropathies                             | musculoskeletal       |
| 716.9     | PRS_PC1 | -0,043 | 0,006 | 0,958 | 1,16E-13 | 34687   | 291305     | Arthropathy NOS                                 | musculoskeletal       |
| 716.2     | PRS_PC1 | -0,043 | 0,006 | 0,958 | 1,28E-13 | 34250   | 291742     | Unspecified monoarthritis                       | musculoskeletal       |
| 454.1     | PRS_PC1 | 0,055  | 0,008 | 1,056 | 1,20E-12 | 18755   | 307237     | Varicose veins of lower extremity               | circulatory system    |
| 454       | PRS_PC1 | 0,052  | 0,007 | 1,054 | 1,74E-12 | 20111   | 305881     | Varicose veins                                  | circulatory system    |
| 496       | PRS_PC1 | 0,050  | 0,007 | 1,051 | 1,17E-11 | 20907   | 305085     | Chronic airway obstruction                      | respiratory           |
| 726       | PRS_PC1 | -0,045 | 0,007 | 0,956 | 1,68E-11 | 25654   | 300338     | Peripheral enthesopathies and allied syndromes  | musculoskeletal       |
| 278.1     | PRS_PC1 | -0,036 | 0,006 | 0,964 | 6,29E-10 | 33781   | 292211     | Obesity                                         | endocrine/metabolic   |
| 727       | PRS_PC1 | -0,053 | 0,009 | 0,948 | 6,30E-10 | 14714   | 311278     | Other disorders of synovium, tendon, and bursa  | musculoskeletal       |
| 727.1     | PRS_PC1 | -0,053 | 0,009 | 0,948 | 6,30E-10 | 14714   | 311278     | Synovitis and tenosynovitis                     | musculoskeletal       |
| 278       | PRS_PC1 | -0,036 | 0,006 | 0,965 | 7,83E-10 | 33864   | 292128     | Overweight, obesity and other hyperalimentation | endocrine/metabolic   |
| 495       | PRS_PC1 | 0,030  | 0,005 | 1,031 | 7,92E-10 | 50599   | 275393     | Asthma                                          | respiratory           |
| 250       | PRS_PC1 | -0,032 | 0,006 | 0,968 | 1,90E-07 | 30016   | 295976     | Diabetes mellitus                               | endocrine/metabolic   |
| 835       | PRS_PC1 | -0,038 | 0,007 | 0,963 | 2,25E-07 | 20413   | 305579     | Internal derangement of knee                    | injuries & poisonings |
| 250.2     | PRS_PC1 | -0,031 | 0,006 | 0,969 | 7,54E-07 | 29163   | 296829     | Type 2 diabetes                                 | endocrine/metabolic   |
| 564.1     | PRS_PC1 | 0,032  | 0,007 | 1,032 | 1,50E-06 | 26118   | 299874     | Irritable Bowel Syndrome                        | digestive             |

|       |         |        |       |       |          |       |        |                                                                |                     |
|-------|---------|--------|-------|-------|----------|-------|--------|----------------------------------------------------------------|---------------------|
| 729   | PRS_PC1 | -0,045 | 0,009 | 0,956 | 1,58E-06 | 12607 | 313385 | Other disorders of soft tissues                                | musculoskeletal     |
| 569   | PRS_PC1 | 0,029  | 0,007 | 1,029 | 1,59E-05 | 25982 | 300010 | Other disorders of intestine                                   | digestive           |
| 522   | PRS_PC1 | 0,057  | 0,013 | 1,059 | 1,63E-05 | 6049  | 319943 | Diseases of pulp and periapical tissues                        | digestive           |
| 313   | PRS_PC1 | 0,275  | 0,064 | 1,317 | 1,81E-05 | 252   | 325740 | Pervasive developmental disorders                              | mental disorders    |
| 300   | PRS_PC1 | 0,072  | 0,017 | 1,074 | 2,22E-05 | 3675  | 322317 | Anxiety disorders                                              | mental disorders    |
| 253.1 | PRS_PC1 | 0,157  | 0,038 | 1,170 | 2,83E-05 | 737   | 325255 | Pituitary hyperfunction                                        | endocrine/metabolic |
| 253   | PRS_PC1 | 0,157  | 0,037 | 1,170 | 2,86E-05 | 740   | 325252 | Disorders of the pituitary gland and its hypothalamic control  | endocrine/metabolic |
| 700   | PRS_PC1 | 0,077  | 0,020 | 1,080 | 7,99E-05 | 2745  | 323247 | Corns and callosities                                          | dermatologic        |
| 291   | PRS_PC1 | 0,129  | 0,033 | 1,138 | 8,47E-05 | 966   | 325026 | Other specified nonpsychotic and/or transient mental disorders | mental disorders    |
| 303   | PRS_PC1 | 0,082  | 0,021 | 1,086 | 1,04E-04 | 2328  | 323664 | Psychogenic and somatoform disorders                           | mental disorders    |
| 303.4 | PRS_PC1 | 0,082  | 0,021 | 1,085 | 1,18E-04 | 2325  | 323667 | Somatoform disorder                                            | mental disorders    |
| 574   | PRS_PC1 | -0,024 | 0,006 | 0,976 | 1,66E-04 | 27394 | 298598 | Cholelithiasis and cholecystitis                               | digestive           |
| 340   | PRS_PC1 | -0,029 | 0,008 | 0,972 | 1,88E-04 | 18615 | 307377 | Migraine                                                       | neurological        |
| 706.1 | PRS_PC1 | 0,060  | 0,016 | 1,062 | 2,71E-04 | 3901  | 322091 | Acne                                                           | dermatologic        |
| 496.1 | PRS_PC1 | 0,062  | 0,017 | 1,063 | 2,78E-04 | 3675  | 322317 | Emphysema                                                      | respiratory         |
| 585.3 | PRS_PC1 | -0,028 | 0,008 | 0,972 | 3,20E-04 | 18563 | 307429 | Chronic renal failure [CKD]                                    | genitourinary       |
| 300.3 | PRS_PC1 | 0,145  | 0,041 | 1,156 | 3,97E-04 | 616   | 325376 | Obsessive-compulsive disorders                                 | mental disorders    |
| 497   | PRS_PC1 | 0,043  | 0,012 | 1,044 | 4,41E-04 | 7024  | 318968 | Bronchitis                                                     | respiratory         |
| 574.1 | PRS_PC1 | -0,023 | 0,007 | 0,977 | 4,44E-04 | 25412 | 300580 | Cholelithiasis                                                 | digestive           |
| 251   | PRS_PC1 | -0,065 | 0,019 | 0,937 | 4,67E-04 | 2998  | 322994 | Other disorders of pancreatic internal secretion               | endocrine/metabolic |
| 149.4 | PRS_PC1 | 0,199  | 0,057 | 1,220 | 5,14E-04 | 316   | 325676 | Cancer of larynx                                               | neoplasms           |
| 317   | PRS_PC1 | 0,090  | 0,026 | 1,094 | 5,73E-04 | 1520  | 324472 | Alcohol-related disorders                                      | mental disorders    |
| 317.1 | PRS_PC1 | 0,090  | 0,026 | 1,094 | 5,73E-04 | 1520  | 324472 | Alcoholism                                                     | mental disorders    |

|        |         |        |       |       |          |        |        |                                                                |                     |
|--------|---------|--------|-------|-------|----------|--------|--------|----------------------------------------------------------------|---------------------|
| 317.11 | PRS_PC1 | 0,090  | 0,026 | 1,094 | 5,73E-04 | 1520   | 324472 | Alcoholic liver damage                                         | mental disorders    |
| 519    | PRS_PC1 | 0,017  | 0,005 | 1,017 | 9,53E-04 | 47255  | 278737 | Other diseases of respiratory system, not elsewhere classified | respiratory         |
| 519.8  | PRS_PC1 | 0,017  | 0,005 | 1,017 | 9,53E-04 | 47255  | 278737 | Other diseases of respiratory system, NEC                      | respiratory         |
| 250.1  | PRS_PC1 | -0,055 | 0,017 | 0,946 | 9,80E-04 | 3699   | 322293 | Type 1 diabetes                                                | endocrine/metabolic |
| 380    | PRS_PC1 | 0,023  | 0,007 | 1,024 | 1,10E-03 | 21979  | 304013 | Disorders of external ear                                      | sense organs        |
| 480    | PRS_PC1 | 0,021  | 0,007 | 1,022 | 1,30E-03 | 25652  | 300340 | Pneumonia                                                      | respiratory         |
| 550.3  | PRS_PC1 | 0,092  | 0,030 | 1,096 | 1,89E-03 | 1188   | 324804 | Femoral hernia                                                 | digestive           |
| 455    | PRS_PC1 | 0,020  | 0,007 | 1,021 | 2,05E-03 | 25545  | 300447 | Hemorrhoids                                                    | circulatory system  |
| 592.2  | PRS_PC1 | 0,105  | 0,036 | 1,111 | 3,14E-03 | 822    | 325170 | Urethritis and urethral syndrome                               | genitourinary       |
| 180    | PRS_PC1 | 0,031  | 0,011 | 1,032 | 3,54E-03 | 9591   | 316401 | Cervical cancer and dysplasia                                  | neoplasms           |
| 706    | PRS_PC1 | 0,024  | 0,008 | 1,024 | 3,94E-03 | 16013  | 309979 | Diseases of sebaceous glands                                   | dermatologic        |
| 585    | PRS_PC1 | -0,019 | 0,006 | 0,982 | 3,99E-03 | 28323  | 297669 | Renal failure                                                  | genitourinary       |
| 153.3  | PRS_PC1 | 0,062  | 0,022 | 1,064 | 4,15E-03 | 2254   | 323738 | Malignant neoplasm of rectum, rectosigmoid junction, and anus  | neoplasms           |
| 476    | PRS_PC1 | 0,017  | 0,006 | 1,017 | 5,24E-03 | 32725  | 293267 | Allergic rhinitis                                              | respiratory         |
| 366.2  | PRS_PC1 | -0,021 | 0,008 | 0,979 | 5,46E-03 | 20226  | 305766 | Senile cataract                                                | sense organs        |
| 500    | PRS_PC1 | 0,089  | 0,032 | 1,093 | 5,52E-03 | 1013   | 324979 | Lung disease due to external agents                            | respiratory         |
| 401.1  | PRS_PC1 | -0,011 | 0,004 | 0,989 | 5,60E-03 | 116309 | 209683 | Essential hypertension                                         | circulatory system  |
| 711    | PRS_PC1 | -0,105 | 0,038 | 0,900 | 5,62E-03 | 721    | 325271 | Arthropathy associated with infections                         | musculoskeletal     |
| 079.1  | PRS_PC1 | -0,032 | 0,012 | 0,969 | 5,99E-03 | 7975   | 318017 | Varicella infection                                            | infectious diseases |
| 596    | PRS_PC1 | 0,021  | 0,008 | 1,021 | 6,55E-03 | 18096  | 307896 | Other disorders of bladder                                     | genitourinary       |
| 79     | PRS_PC1 | -0,020 | 0,007 | 0,981 | 6,64E-03 | 21312  | 304680 | Viral infection                                                | infectious diseases |
| 401    | PRS_PC1 | -0,011 | 0,004 | 0,990 | 6,99E-03 | 116514 | 209478 | Hypertension                                                   | circulatory system  |
| 433    | PRS_PC1 | 0,022  | 0,008 | 1,022 | 7,79E-03 | 16549  | 309443 | Cerebrovascular disease                                        | circulatory system  |

|       |         |        |       |       |          |       |        |                                                              |                         |
|-------|---------|--------|-------|-------|----------|-------|--------|--------------------------------------------------------------|-------------------------|
| 472   | PRS_PC1 | 0,038  | 0,014 | 1,039 | 8,62E-03 | 5098  | 320894 | Chronic pharyngitis and nasopharyngitis                      | respiratory             |
| 711.1 | PRS_PC1 | -0,101 | 0,039 | 0,904 | 8,83E-03 | 692   | 325300 | Pyogenic arthritis                                           | musculoskeletal         |
| 695.3 | PRS_PC1 | 0,041  | 0,016 | 1,042 | 8,98E-03 | 4336  | 321656 | Rosacea                                                      | dermatologic            |
| 356   | PRS_PC1 | 0,132  | 0,051 | 1,141 | 9,15E-03 | 405   | 325587 | Hereditary and idiopathic peripheral neuropathy              | neurological            |
| 694.2 | PRS_PC1 | 0,045  | 0,017 | 1,046 | 9,47E-03 | 3435  | 322557 | Other dyschromia                                             | dermatologic            |
| 694   | PRS_PC1 | 0,041  | 0,016 | 1,042 | 9,61E-03 | 4176  | 321816 | Dyschromia and Vitiligo                                      | dermatologic            |
| 645   | PRS_PC1 | 0,076  | 0,029 | 1,079 | 0,0101   | 1257  | 324735 | Late pregnancy and failed induction                          | pregnancy complications |
| 112   | PRS_PC1 | 0,028  | 0,011 | 1,029 | 0,0103   | 8839  | 317153 | Candidiasis                                                  | infectious diseases     |
| 333.4 | PRS_PC1 | 0,088  | 0,034 | 1,092 | 0,0106   | 874   | 325118 | Torsion dystonia                                             | neurological            |
| 732.1 | PRS_PC1 | -0,099 | 0,039 | 0,906 | 0,0112   | 677   | 325315 | Juvenile osteochondrosis                                     | musculoskeletal         |
| 165   | PRS_PC1 | 0,051  | 0,020 | 1,052 | 0,0117   | 2572  | 323420 | Cancer within the respiratory system                         | neoplasms               |
| 291.4 | PRS_PC1 | 0,088  | 0,035 | 1,092 | 0,0120   | 848   | 325144 | Specific nonpsychotic mental disorders due to brain damage   | mental disorders        |
| 611   | PRS_PC1 | 0,024  | 0,010 | 1,024 | 0,0126   | 11937 | 314055 | Abnormal findings on mammogram or breast exam                | genitourinary           |
| 611.3 | PRS_PC1 | 0,024  | 0,010 | 1,024 | 0,0126   | 11937 | 314055 | Lump or mass in breast                                       | genitourinary           |
| 696   | PRS_PC1 | 0,024  | 0,010 | 1,024 | 0,0130   | 11902 | 314090 | Psoriasis and related disorders                              | dermatologic            |
| 290   | PRS_PC1 | 0,038  | 0,016 | 1,039 | 0,0147   | 4388  | 321604 | Delirium dementia and amnestic and other cognitive disorders | mental disorders        |
| 601.1 | PRS_PC1 | 0,042  | 0,017 | 1,043 | 0,0155   | 3560  | 322432 | Prostatitis                                                  | genitourinary           |
| 433.3 | PRS_PC1 | 0,031  | 0,013 | 1,032 | 0,0160   | 6360  | 319632 | Cerebral ischemia                                            | circulatory system      |
| 601   | PRS_PC1 | 0,032  | 0,013 | 1,033 | 0,0170   | 5991  | 320001 | Inflammatory diseases of prostate                            | genitourinary           |
| 323   | PRS_PC1 | 0,088  | 0,037 | 1,091 | 0,0171   | 769   | 325223 | Encephalitis                                                 | neurological            |
| 180.1 | PRS_PC1 | 0,086  | 0,036 | 1,090 | 0,0176   | 784   | 325208 | Cervical cancer                                              | neoplasms               |

|        |         |        |       |       |        |       |        |                                                                       |                         |
|--------|---------|--------|-------|-------|--------|-------|--------|-----------------------------------------------------------------------|-------------------------|
| 696.4  | PRS_PC1 | 0,024  | 0,010 | 1,024 | 0,0181 | 10748 | 315244 | Psoriasis                                                             | dermatologic            |
| 573    | PRS_PC1 | 0,025  | 0,011 | 1,025 | 0,0182 | 9629  | 316363 | Other disorders of liver                                              | digestive               |
| 180.3  | PRS_PC1 | 0,026  | 0,011 | 1,026 | 0,0187 | 9100  | 316892 | Cervical intraepithelial neoplasia [CIN] [Cervical dysplasia]         | neoplasms               |
| 634    | PRS_PC1 | 0,030  | 0,013 | 1,031 | 0,0195 | 6529  | 319463 | Miscarriage; stillbirth                                               | pregnancy complications |
| 149    | PRS_PC1 | 0,089  | 0,038 | 1,093 | 0,0206 | 702   | 325290 | Cancer of larynx, pharynx, nasal cavities                             | neoplasms               |
| 345    | PRS_PC1 | 0,029  | 0,013 | 1,030 | 0,0245 | 6214  | 319778 | Epilepsy, recurrent seizures, convulsions                             | neurological            |
| 715    | PRS_PC1 | 0,031  | 0,014 | 1,032 | 0,0261 | 5268  | 320724 | Other inflammatory spondylopathies                                    | musculoskeletal         |
| 165.1  | PRS_PC1 | 0,047  | 0,021 | 1,048 | 0,0268 | 2319  | 323673 | Cancer of bronchus; lung                                              | neoplasms               |
| 701.5  | PRS_PC1 | -0,059 | 0,027 | 0,943 | 0,0276 | 1453  | 324539 | Abnormal granulation tissue                                           | dermatologic            |
| 327    | PRS_PC1 | 0,019  | 0,009 | 1,019 | 0,0296 | 14483 | 311509 | Sleep disorders                                                       | neurological            |
| 384.4  | PRS_PC1 | 0,053  | 0,025 | 1,055 | 0,0311 | 1691  | 324301 | Perforation of tympanic membrane                                      | sense organs            |
| 204.2  | PRS_PC1 | 0,106  | 0,049 | 1,112 | 0,0311 | 429   | 325563 | Myeloid leukemia                                                      | neoplasms               |
| 401.22 | PRS_PC1 | -0,054 | 0,025 | 0,947 | 0,0315 | 1639  | 324353 | Hypertensive chronic kidney disease                                   | circulatory system      |
| 750    | PRS_PC1 | 0,064  | 0,030 | 1,066 | 0,0330 | 1160  | 324832 | Digestive congenital anomalies                                        | congenital anomalies    |
| 600    | PRS_PC1 | 0,016  | 0,007 | 1,016 | 0,0336 | 24391 | 301601 | Hyperplasia of prostate                                               | genitourinary           |
| 433.1  | PRS_PC1 | 0,050  | 0,024 | 1,052 | 0,0338 | 1865  | 324127 | Occlusion and stenosis of precerebral arteries                        | circulatory system      |
| 271    | PRS_PC1 | 0,120  | 0,057 | 1,128 | 0,0343 | 322   | 325670 | Disorders of carbohydrate transport and metabolism                    | endocrine/metabolic     |
| 271.3  | PRS_PC1 | 0,120  | 0,057 | 1,128 | 0,0343 | 322   | 325670 | Intestinal disaccharidase deficiencies and disaccharide malabsorption | endocrine/metabolic     |

|        |         |        |       |       |        |       |        |                                                                |                      |
|--------|---------|--------|-------|-------|--------|-------|--------|----------------------------------------------------------------|----------------------|
| 597.1  | PRS_PC1 | 0,033  | 0,015 | 1,033 | 0,0346 | 4439  | 321553 | Urethral stricture (not specified as infectious)               | genitourinary        |
| 384    | PRS_PC1 | 0,046  | 0,022 | 1,047 | 0,0348 | 2173  | 323819 | Other disorders of tympanic membrane                           | sense organs         |
| 619    | PRS_PC1 | 0,021  | 0,010 | 1,021 | 0,0357 | 11409 | 314583 | Noninflammatory female genital disorders                       | genitourinary        |
| 280    | PRS_PC1 | -0,015 | 0,007 | 0,985 | 0,0369 | 20458 | 305534 | Iron deficiency anemias                                        | hematopoietic        |
| 280.1  | PRS_PC1 | -0,015 | 0,007 | 0,985 | 0,0369 | 20458 | 305534 | Iron deficiency anemias, unspecified or not due to blood loss  | hematopoietic        |
| 750.22 | PRS_PC1 | 0,141  | 0,068 | 1,151 | 0,0385 | 224   | 325768 | Congenital anomaly of gallbladder, bile ducts, liver, pancreas | congenital anomalies |
| 190    | PRS_PC1 | 0,100  | 0,050 | 1,105 | 0,0443 | 422   | 325570 | Cancer of eye                                                  | neoplasms            |
| 300.1  | PRS_PC1 | 0,038  | 0,019 | 1,039 | 0,0445 | 2886  | 323106 | Anxiety disorder                                               | mental disorders     |
| 300.13 | PRS_PC1 | 0,038  | 0,019 | 1,039 | 0,0445 | 2886  | 323106 | Phobia                                                         | mental disorders     |
| 174.11 | PRS_PC1 | -0,019 | 0,010 | 0,981 | 0,0447 | 12350 | 313642 | Malignant neoplasm of female breast                            | neoplasms            |
| 686.2  | PRS_PC1 | 0,064  | 0,032 | 1,066 | 0,0454 | 1042  | 324950 | Impetigo                                                       | dermatologic         |
| 592    | PRS_PC1 | 0,018  | 0,009 | 1,018 | 0,0457 | 14233 | 311759 | Cystitis and urethritis                                        | genitourinary        |
| 153    | PRS_PC1 | 0,027  | 0,014 | 1,027 | 0,0517 | 5535  | 320457 | Colorectal cancer                                              | neoplasms            |
| 290.16 | PRS_PC1 | 0,062  | 0,032 | 1,064 | 0,0524 | 1014  | 324978 | Vascular dementia                                              | mental disorders     |
| 368    | PRS_PC1 | 0,020  | 0,011 | 1,021 | 0,0552 | 9454  | 316538 | Visual disturbances                                            | sense organs         |
| 440    | PRS_PC1 | -0,039 | 0,020 | 0,962 | 0,0553 | 2550  | 323442 | Atherosclerosis                                                | circulatory system   |
| 531    | PRS_PC1 | 0,016  | 0,008 | 1,016 | 0,0561 | 15805 | 310187 | Peptic ulcer (excl. esophageal)                                | digestive            |
| 500.2  | PRS_PC1 | 0,075  | 0,039 | 1,078 | 0,0564 | 678   | 325314 | Pneumoconiosis                                                 | respiratory          |
| 695    | PRS_PC1 | 0,021  | 0,011 | 1,021 | 0,0580 | 8745  | 317247 | Erythematous conditions                                        | dermatologic         |
| 381.1  | PRS_PC1 | -0,019 | 0,010 | 0,982 | 0,0587 | 11112 | 314880 | Otitis media                                                   | sense organs         |
| 172.3  | PRS_PC1 | -0,055 | 0,029 | 0,947 | 0,0608 | 1230  | 324762 | Carcinoma in situ of skin                                      | neoplasms            |

|        |         |        |       |       |        |       |        |                                                                        |                         |
|--------|---------|--------|-------|-------|--------|-------|--------|------------------------------------------------------------------------|-------------------------|
| 755.61 | PRS_PC1 | 0,115  | 0,062 | 1,122 | 0,0616 | 273   | 325719 | Congenital hip dysplasia and deformity                                 | congenital anomalies    |
| 580.31 | PRS_PC1 | -0,072 | 0,039 | 0,930 | 0,0621 | 690   | 325302 | Nephritis and nephropathy in diseases classified elsewhere             | genitourinary           |
| 204.4  | PRS_PC1 | -0,080 | 0,043 | 0,924 | 0,0625 | 569   | 325423 | Multiple myeloma                                                       | neoplasms               |
| 366    | PRS_PC1 | -0,010 | 0,006 | 0,990 | 0,0639 | 42435 | 283557 | Cataract                                                               | sense organs            |
| 10     | PRS_PC1 | 0,080  | 0,043 | 1,083 | 0,0645 | 551   | 325441 | Tuberculosis                                                           | infectious diseases     |
| 371.3  | PRS_PC1 | 0,030  | 0,016 | 1,030 | 0,0659 | 4053  | 321939 | Inflammation of eyelids                                                | sense organs            |
| 565    | PRS_PC1 | 0,023  | 0,012 | 1,023 | 0,0678 | 6859  | 319133 | Anal and rectal conditions                                             | digestive               |
| 530    | PRS_PC1 | 0,008  | 0,005 | 1,008 | 0,0698 | 64110 | 261882 | Diseases of esophagus                                                  | digestive               |
| 594    | PRS_PC1 | -0,018 | 0,010 | 0,982 | 0,0700 | 10686 | 315306 | Urinary calculus                                                       | genitourinary           |
| 618    | PRS_PC1 | 0,015  | 0,008 | 1,015 | 0,0708 | 15992 | 310000 | Genital prolapse                                                       | genitourinary           |
| 618.1  | PRS_PC1 | 0,015  | 0,008 | 1,015 | 0,0708 | 15992 | 310000 | Prolapse of vaginal walls                                              | genitourinary           |
| 334.1  | PRS_PC1 | 0,107  | 0,060 | 1,113 | 0,0732 | 289   | 325703 | Spinocerebellar disease                                                | neurological            |
| 535    | PRS_PC1 | 0,009  | 0,005 | 1,009 | 0,0738 | 45097 | 280895 | Gastritis and duodenitis                                               | digestive               |
| 530.1  | PRS_PC1 | 0,008  | 0,005 | 1,008 | 0,0742 | 63563 | 262429 | Esophagitis, GERD and related diseases                                 | digestive               |
| 665    | PRS_PC1 | 0,027  | 0,015 | 1,027 | 0,0789 | 5473  | 320519 | Obstetrical/birth trauma                                               | pregnancy complications |
| 619.1  | PRS_PC1 | 0,018  | 0,011 | 1,019 | 0,0811 | 9924  | 316068 | Noninflammatory disorders of ovary, fallopian tube, and broad ligament | genitourinary           |
| 369.5  | PRS_PC1 | 0,014  | 0,008 | 1,014 | 0,0813 | 16858 | 309134 | Conjunctivitis, infectious                                             | sense organs            |
| 750.2  | PRS_PC1 | 0,068  | 0,039 | 1,071 | 0,0815 | 675   | 325317 | Lower gastrointestinal congenital anomalies                            | congenital anomalies    |
| 785    | PRS_PC1 | 0,015  | 0,008 | 1,015 | 0,0828 | 15371 | 310621 | Abdominal pain                                                         | symptoms                |
| 332    | PRS_PC1 | 0,035  | 0,020 | 1,036 | 0,0832 | 2578  | 323414 | Parkinson's disease                                                    | neurological            |
| 721    | PRS_PC1 | 0,011  | 0,007 | 1,011 | 0,0853 | 26186 | 299806 | Spondylosis and allied disorders                                       | musculoskeletal         |
| 732    | PRS_PC1 | -0,062 | 0,036 | 0,940 | 0,0855 | 810   | 325182 | Osteochondropathies                                                    | musculoskeletal         |
| 381.11 | PRS_PC1 | -0,020 | 0,012 | 0,980 | 0,0863 | 7498  | 318494 | Suppurative and unspecified otitis media                               | sense organs            |



|        |         |        |       |       |        |       |        |                                                                     |                         |
|--------|---------|--------|-------|-------|--------|-------|--------|---------------------------------------------------------------------|-------------------------|
| 550.4  | PRS_PC1 | -0,022 | 0,013 | 0,978 | 0,0867 | 6433  | 319559 | Umbilical hernia                                                    | digestive               |
| 369    | PRS_PC1 | 0,014  | 0,008 | 1,014 | 0,0878 | 16957 | 309035 | Infection of the eye                                                | sense organs            |
| 433.21 | PRS_PC1 | 0,021  | 0,012 | 1,021 | 0,0889 | 7119  | 318873 | Cerebral artery occlusion, with cerebral infarction                 | circulatory system      |
| 751.2  | PRS_PC1 | 0,044  | 0,026 | 1,045 | 0,0917 | 1495  | 324497 | Congenital anomalies of urinary system                              | congenital anomalies    |
| 655    | PRS_PC1 | -0,113 | 0,067 | 0,893 | 0,0929 | 230   | 325762 | Known or suspected fetal abnormality affecting management of mother | pregnancy complications |
| 381    | PRS_PC1 | -0,015 | 0,009 | 0,986 | 0,0983 | 14157 | 311835 | Otitis media and Eustachian tube disorders                          | sense organs            |
| 132.1  | PRS_PC1 | 0,111  | 0,068 | 1,117 | 0,1014 | 227   | 325765 | Pediculosis and phthirus infestation                                | infectious diseases     |
| 305.2  | PRS_PC1 | 0,065  | 0,040 | 1,067 | 0,1020 | 651   | 325341 | Eating disorder                                                     | mental disorders        |
| 755.6  | PRS_PC1 | 0,094  | 0,058 | 1,098 | 0,1046 | 310   | 325682 | Other congenital anomalies of lower limb, including pelvic girdle   | congenital anomalies    |
| 475    | PRS_PC1 | 0,017  | 0,010 | 1,017 | 0,1081 | 9931  | 316061 | Chronic sinusitis                                                   | respiratory             |
| 575    | PRS_PC1 | -0,020 | 0,013 | 0,980 | 0,1083 | 6708  | 319284 | Other biliary tract disease                                         | digestive               |
| 451    | PRS_PC1 | 0,014  | 0,009 | 1,014 | 0,1084 | 14348 | 311644 | Phlebitis and thrombophlebitis                                      | circulatory system      |
| 594.2  | PRS_PC1 | -0,046 | 0,029 | 0,955 | 0,1104 | 1242  | 324750 | Calculus of lower urinary tract                                     | genitourinary           |
| 367    | PRS_PC1 | 0,017  | 0,011 | 1,017 | 0,1131 | 9340  | 316652 | Disorders of refraction and accommodation; blindness and low vision | sense organs            |
| 375    | PRS_PC1 | 0,015  | 0,010 | 1,016 | 0,1141 | 11432 | 314560 | Disorders of lacrimal system                                        | sense organs            |
| 695.81 | PRS_PC1 | -0,108 | 0,069 | 0,897 | 0,1160 | 220   | 325772 | Erythema nodosum                                                    | dermatologic            |
| 433.8  | PRS_PC1 | 0,033  | 0,021 | 1,034 | 0,1168 | 2338  | 323654 | Late effects of cerebrovascular disease                             | circulatory system      |
| 728.7  | PRS_PC1 | -0,012 | 0,008 | 0,988 | 0,1170 | 18488 | 307504 | Fasciitis                                                           | musculoskeletal         |

|        |         |        |       |       |        |       |        |                                                                               |                         |
|--------|---------|--------|-------|-------|--------|-------|--------|-------------------------------------------------------------------------------|-------------------------|
| 597    | PRS_PC1 | 0,022  | 0,014 | 1,022 | 0,1177 | 5540  | 320452 | Other disorders of urethra and urinary tract                                  | genitourinary           |
| 041.2  | PRS_PC1 | -0,034 | 0,022 | 0,966 | 0,1185 | 2168  | 323824 | Streptococcus infection                                                       | infectious diseases     |
| 495.2  | PRS_PC1 | 0,079  | 0,052 | 1,083 | 0,1238 | 389   | 325603 | Asthma with exacerbation                                                      | respiratory             |
| 596.5  | PRS_PC1 | 0,025  | 0,016 | 1,025 | 0,1245 | 3975  | 322017 | Functional disorders of bladder                                               | genitourinary           |
| 433.2  | PRS_PC1 | 0,015  | 0,010 | 1,015 | 0,1266 | 11549 | 314443 | Occlusion of cerebral arteries                                                | circulatory system      |
| 261    | PRS_PC1 | 0,020  | 0,013 | 1,020 | 0,1292 | 5914  | 320078 | Vitamin deficiency                                                            | endocrine/metabolic     |
| 172    | PRS_PC1 | -0,010 | 0,007 | 0,990 | 0,1303 | 24693 | 301299 | Skin cancer                                                                   | neoplasms               |
| 642    | PRS_PC1 | -0,043 | 0,028 | 0,958 | 0,1305 | 1298  | 324694 | Hypertension complicating pregnancy, childbirth, and the puerperium           | pregnancy complications |
| 290.1  | PRS_PC1 | 0,024  | 0,016 | 1,025 | 0,1314 | 4098  | 321894 | Dementias                                                                     | mental disorders        |
| 749    | PRS_PC1 | 0,062  | 0,041 | 1,064 | 0,1315 | 610   | 325382 | Congenital anomalies of face and neck                                         | congenital anomalies    |
| 613    | PRS_PC1 | 0,015  | 0,010 | 1,015 | 0,1323 | 11025 | 314967 | Other nonmalignant breast conditions                                          | genitourinary           |
| 507    | PRS_PC1 | 0,014  | 0,009 | 1,014 | 0,1360 | 12474 | 313518 | Pleurisy; pleural effusion                                                    | respiratory             |
| 671    | PRS_PC1 | 0,103  | 0,069 | 1,108 | 0,1378 | 216   | 325776 | Venous/cerebrovascular complications embolism in pregnancy and the puerperium | pregnancy complications |
| 379.2  | PRS_PC1 | 0,017  | 0,011 | 1,017 | 0,1396 | 8260  | 317732 | Disorders of vitreous body                                                    | sense organs            |
| 619.3  | PRS_PC1 | 0,038  | 0,025 | 1,038 | 0,1397 | 1621  | 324371 | Noninflammatory disorders of cervix                                           | genitourinary           |
| 372    | PRS_PC1 | 0,019  | 0,013 | 1,019 | 0,1398 | 6326  | 319666 | Disorders of conjunctiva                                                      | sense organs            |
| 737    | PRS_PC1 | 0,028  | 0,019 | 1,028 | 0,1413 | 2998  | 322994 | Curvature of spine                                                            | musculoskeletal         |
| 737.3  | PRS_PC1 | 0,028  | 0,019 | 1,028 | 0,1413 | 2998  | 322994 | Kyphoscoliosis and scoliosis                                                  | musculoskeletal         |
| 592.1  | PRS_PC1 | 0,013  | 0,009 | 1,013 | 0,1423 | 13554 | 312438 | Cystitis                                                                      | genitourinary           |
| 740    | PRS_PC1 | -0,011 | 0,007 | 0,989 | 0,1432 | 20391 | 305601 | Osteoarthrosis                                                                | musculoskeletal         |
| 740.1  | PRS_PC1 | -0,011 | 0,007 | 0,989 | 0,1432 | 20391 | 305601 | Osteoarthritis; localized                                                     | musculoskeletal         |
| 751.21 | PRS_PC1 | 0,054  | 0,037 | 1,056 | 0,1437 | 750   | 325242 | Cystic kidney disease                                                         | congenital anomalies    |

|        |         |        |       |       |        |       |        |                                                          |                     |
|--------|---------|--------|-------|-------|--------|-------|--------|----------------------------------------------------------|---------------------|
| 585.2  | PRS_PC1 | -0,029 | 0,020 | 0,972 | 0,1457 | 2705  | 323287 | Renal failure NOS                                        | genitourinary       |
| 550.2  | PRS_PC1 | 0,008  | 0,005 | 1,008 | 0,1457 | 43360 | 282632 | Diaphragmatic hernia                                     | digestive           |
| 411    | PRS_PC1 | -0,008 | 0,005 | 0,992 | 0,1463 | 45298 | 280694 | Ischemic Heart Disease                                   | circulatory system  |
| 415.1  | PRS_PC1 | -0,016 | 0,011 | 0,984 | 0,1470 | 8424  | 317568 | Acute pulmonary heart disease                            | circulatory system  |
| 415.11 | PRS_PC1 | -0,016 | 0,011 | 0,984 | 0,1470 | 8424  | 317568 | Pulmonary embolism and infarction, acute                 | circulatory system  |
| 367.9  | PRS_PC1 | 0,028  | 0,020 | 1,029 | 0,1563 | 2634  | 323358 | Blindness and low vision                                 | sense organs        |
| 174    | PRS_PC1 | -0,013 | 0,009 | 0,987 | 0,1566 | 14118 | 311874 | Breast cancer                                            | neoplasms           |
| 379    | PRS_PC1 | 0,015  | 0,010 | 1,015 | 0,1567 | 10290 | 315702 | Other disorders of eye                                   | sense organs        |
| 452    | PRS_PC1 | -0,041 | 0,029 | 0,960 | 0,1567 | 1241  | 324751 | Other venous embolism and thrombosis                     | circulatory system  |
| 041.21 | PRS_PC1 | -0,041 | 0,029 | 0,960 | 0,1574 | 1237  | 324755 | Rheumatic fever / chorea                                 | infectious diseases |
| 401.2  | PRS_PC1 | -0,031 | 0,022 | 0,969 | 0,1578 | 2161  | 323831 | Hypertensive heart and/or renal disease                  | circulatory system  |
| 70     | PRS_PC1 | 0,041  | 0,029 | 1,041 | 0,1587 | 1251  | 324741 | Viral hepatitis                                          | infectious diseases |
| 411.9  | PRS_PC1 | -0,024 | 0,018 | 0,976 | 0,1656 | 3383  | 322609 | Other acute and subacute forms of ischemic heart disease | circulatory system  |
| 172.1  | PRS_PC1 | -0,021 | 0,015 | 0,979 | 0,1661 | 4429  | 321563 | Melanomas of skin, dx or hx                              | neoplasms           |
| 172.11 | PRS_PC1 | -0,021 | 0,015 | 0,979 | 0,1661 | 4429  | 321563 | Melanomas of skin                                        | neoplasms           |
| 580.2  | PRS_PC1 | 0,081  | 0,059 | 1,084 | 0,1673 | 301   | 325691 | Nephrotic syndrome without mention of glomerulonephritis | genitourinary       |
| 411.8  | PRS_PC1 | -0,008 | 0,006 | 0,992 | 0,1716 | 37071 | 288921 | Other chronic ischemic heart disease, unspecified        | circulatory system  |
| 71     | PRS_PC1 | 0,087  | 0,064 | 1,090 | 0,1733 | 257   | 325735 | Human immunodeficiency virus [HIV] disease               | infectious diseases |
| 071.1  | PRS_PC1 | 0,087  | 0,064 | 1,090 | 0,1733 | 257   | 325735 | HIV infection, symptomatic                               | infectious diseases |
| 448    | PRS_PC1 | 0,030  | 0,022 | 1,030 | 0,1735 | 2181  | 323811 | Disease of capillaries                                   | circulatory system  |
| 715.2  | PRS_PC1 | 0,035  | 0,026 | 1,036 | 0,1743 | 1548  | 324444 | Ankylosing spondylitis                                   | musculoskeletal     |
| 733    | PRS_PC1 | -0,019 | 0,014 | 0,981 | 0,1752 | 5250  | 320742 | Other disorders of bone and cartilage                    | musculoskeletal     |

|        |         |        |       |       |        |       |        |                                 |                         |
|--------|---------|--------|-------|-------|--------|-------|--------|---------------------------------|-------------------------|
|        |         |        |       |       |        |       |        | Peritonitis and retroperitoneal |                         |
| 567    | PRS_PC1 | 0,027  | 0,020 | 1,027 | 0,1762 | 2663  | 323329 | infections                      | digestive               |
| 425    | PRS_PC1 | -0,028 | 0,021 | 0,973 | 0,1766 | 2485  | 323507 | Cardiomyopathy                  | circulatory system      |
|        |         |        |       |       |        |       |        | Purpura and other hemorrhagic   |                         |
| 287    | PRS_PC1 | 0,022  | 0,016 | 1,022 | 0,1772 | 3878  | 322114 | conditions                      | hematopoietic           |
|        |         |        |       |       |        |       |        | Other inflammatory disorders of |                         |
| 601.8  | PRS_PC1 | 0,069  | 0,051 | 1,071 | 0,1789 | 398   | 325594 | male genital organs             | genitourinary           |
|        |         |        |       |       |        |       |        | Primary/intrinsic               |                         |
| 425.1  | PRS_PC1 | -0,028 | 0,021 | 0,973 | 0,1813 | 2432  | 323560 | cardiomyopathies                | circulatory system      |
| 008.5  | PRS_PC1 | 0,050  | 0,038 | 1,051 | 0,1845 | 731   | 325261 | Bacterial enteritis             | infectious diseases     |
| 550    | PRS_PC1 | 0,006  | 0,004 | 1,006 | 0,1852 | 72424 | 253568 | Abdominal hernia                | digestive               |
|        |         |        |       |       |        |       |        | Disorders involving the immune  |                         |
| 279    | PRS_PC1 | 0,073  | 0,055 | 1,076 | 0,1869 | 338   | 325654 | mechanism                       | endocrine/metabolic     |
| 279.1  | PRS_PC1 | 0,073  | 0,055 | 1,076 | 0,1869 | 338   | 325654 | Immunity deficiency             | endocrine/metabolic     |
| 282    | PRS_PC1 | -0,073 | 0,055 | 0,930 | 0,1871 | 342   | 325650 | Hereditary hemolytic anemias    | hematopoietic           |
| 174.1  | PRS_PC1 | -0,012 | 0,009 | 0,988 | 0,1872 | 14075 | 311917 | Breast cancer [female]          | neoplasms               |
| 636.3  | PRS_PC1 | 0,039  | 0,030 | 1,040 | 0,1884 | 1186  | 324806 | Hemorrhage in early pregnancy   | pregnancy complications |
| 531.2  | PRS_PC1 | 0,014  | 0,011 | 1,014 | 0,1890 | 9199  | 316793 | Gastric ulcer                   | digestive               |
| 415    | PRS_PC1 | -0,015 | 0,011 | 0,985 | 0,1895 | 8506  | 317486 | Pulmonary heart disease         | circulatory system      |
|        |         |        |       |       |        |       |        | Benign neoplasm of pituitary    |                         |
|        |         |        |       |       |        |       |        | gland and craniopharyngeal duct |                         |
| 227.3  | PRS_PC1 | 0,085  | 0,065 | 1,088 | 0,1906 | 248   | 325744 | (pouch)                         | neoplasms               |
| 134    | PRS_PC1 | 0,047  | 0,036 | 1,048 | 0,1958 | 793   | 325199 | Helminthiases                   | infectious diseases     |
| 634.3  | PRS_PC1 | 0,040  | 0,031 | 1,041 | 0,1965 | 1063  | 324929 | Ectopic pregnancy               | pregnancy complications |
| 703    | PRS_PC1 | -0,014 | 0,011 | 0,986 | 0,1985 | 8485  | 317507 | Diseases of nail, NOS           | dermatologic            |
| 599.1  | PRS_PC1 | -0,019 | 0,015 | 0,981 | 0,1988 | 4901  | 321091 | Urinary obstruction             | genitourinary           |
| 394.7  | PRS_PC1 | 0,039  | 0,030 | 1,040 | 0,1994 | 1138  | 324854 | Disease of tricuspid valve      | circulatory system      |
|        |         |        |       |       |        |       |        | Cholecystitis without           |                         |
| 574.3  | PRS_PC1 | -0,019 | 0,015 | 0,981 | 0,1996 | 4856  | 321136 | cholelithiasis                  | digestive               |
| 530.11 | PRS_PC1 | 0,006  | 0,005 | 1,006 | 0,1999 | 56364 | 269628 | GERD                            | digestive               |

|        |         |        |       |       |        |       |        |                                     |                      |
|--------|---------|--------|-------|-------|--------|-------|--------|-------------------------------------|----------------------|
| 380.1  | PRS_PC1 | 0,011  | 0,008 | 1,011 | 0,2003 | 15948 | 310044 | Otitis externa                      | sense organs         |
| 613.1  | PRS_PC1 | -0,034 | 0,027 | 0,967 | 0,2009 | 1486  | 324506 | Inflammatory disease of breast      | genitourinary        |
| 342    | PRS_PC1 | 0,024  | 0,019 | 1,024 | 0,2030 | 3026  | 322966 | Hemiplegia                          | neurological         |
| 134.1  | PRS_PC1 | 0,051  | 0,040 | 1,053 | 0,2031 | 642   | 325350 | Intestinal helminthiases            | infectious diseases  |
| 145.2  | PRS_PC1 | -0,072 | 0,057 | 0,931 | 0,2077 | 318   | 325674 | Cancer of tongue                    | neoplasms            |
| 706.2  | PRS_PC1 | 0,012  | 0,009 | 1,012 | 0,2125 | 12386 | 313606 | Sebaceous cyst                      | dermatologic         |
| 480.2  | PRS_PC1 | 0,052  | 0,042 | 1,054 | 0,2161 | 581   | 325411 | Viral pneumonia                     | respiratory          |
| 261.2  | PRS_PC1 | 0,024  | 0,019 | 1,024 | 0,2166 | 2882  | 323110 | Vitamin B-complex deficiencies      | endocrine/metabolic  |
| 8      | PRS_PC1 | 0,009  | 0,007 | 1,009 | 0,2169 | 21257 | 304735 | Intestinal infection                | infectious diseases  |
|        |         |        |       |       |        |       |        | Other specified erythematous        |                      |
| 695.8  | PRS_PC1 | -0,080 | 0,065 | 0,923 | 0,2170 | 248   | 325744 | conditions                          | dermatologic         |
| 770    | PRS_PC1 | -0,062 | 0,050 | 0,940 | 0,2171 | 410   | 325582 | Myalgia and myositis unspecified    | symptoms             |
|        |         |        |       |       |        |       |        | Sexual and gender identity          |                      |
| 302    | PRS_PC1 | 0,030  | 0,025 | 1,030 | 0,2278 | 1686  | 324306 | disorders                           | mental disorders     |
| 443    | PRS_PC1 | 0,013  | 0,010 | 1,013 | 0,2287 | 9755  | 316237 | Peripheral vascular disease         | circulatory system   |
|        |         |        |       |       |        |       |        | Other specified peripheral          |                      |
| 443.8  | PRS_PC1 | 0,013  | 0,010 | 1,013 | 0,2287 | 9755  | 316237 | vascular diseases                   | circulatory system   |
|        |         |        |       |       |        |       |        | Upper gastrointestinal congenital   |                      |
| 750.1  | PRS_PC1 | 0,059  | 0,049 | 1,061 | 0,2288 | 432   | 325560 | anomalies                           | congenital anomalies |
| 531.3  | PRS_PC1 | 0,015  | 0,012 | 1,015 | 0,2289 | 7304  | 318688 | Duodenal ulcer                      | digestive            |
| 189.21 | PRS_PC1 | -0,036 | 0,030 | 0,965 | 0,2297 | 1178  | 324814 | Malignant neoplasm of bladder       | neoplasms            |
| 289.5  | PRS_PC1 | -0,040 | 0,034 | 0,961 | 0,2364 | 923   | 325069 | Diseases of spleen                  | hematopoietic        |
| 755    | PRS_PC1 | 0,034  | 0,029 | 1,034 | 0,2421 | 1240  | 324752 | Congenital anomalies of limbs       | congenital anomalies |
| 474.2  | PRS_PC1 | 0,031  | 0,027 | 1,032 | 0,2435 | 1436  | 324556 | Chronic tonsillitis and adenoiditis | respiratory          |
|        |         |        |       |       |        |       |        | Develomental delays and             |                      |
| 315    | PRS_PC1 | 0,063  | 0,054 | 1,065 | 0,2436 | 356   | 325636 | disorders                           | mental disorders     |

|        |         |        |       |       |        |       |        |                                                                  |                         |
|--------|---------|--------|-------|-------|--------|-------|--------|------------------------------------------------------------------|-------------------------|
|        |         |        |       |       |        |       |        | Benign neoplasm of other endocrine glands and related structures | neoplasms               |
| 227    | PRS_PC1 | 0,072  | 0,064 | 1,075 | 0,2561 | 255   | 325737 |                                                                  |                         |
| 707.1  | PRS_PC1 | 0,021  | 0,018 | 1,021 | 0,2566 | 3187  | 322805 | Decubitus ulcer                                                  | dermatologic            |
|        |         |        |       |       |        |       |        | Nervous system congenital anomalies                              | congenital anomalies    |
| 752    | PRS_PC1 | 0,053  | 0,046 | 1,054 | 0,2571 | 482   | 325510 |                                                                  |                         |
| 204.21 | PRS_PC1 | 0,069  | 0,061 | 1,072 | 0,2580 | 276   | 325716 | Myeloid leukemia, acute                                          | neoplasms               |
| 411.2  | PRS_PC1 | -0,009 | 0,008 | 0,991 | 0,2582 | 17053 | 308939 | Myocardial infarction                                            | circulatory system      |
| 365    | PRS_PC1 | -0,010 | 0,009 | 0,990 | 0,2599 | 13111 | 312881 | Glaucoma                                                         | sense organs            |
|        |         |        |       |       |        |       |        | Pneumonia due to fungus (mycoses)                                | respiratory             |
| 480.3  | PRS_PC1 | -0,068 | 0,061 | 0,934 | 0,2633 | 282   | 325710 |                                                                  |                         |
|        |         |        |       |       |        |       |        | Gout and other crystal arthropathies                             | endocrine/metabolic     |
| 274    | PRS_PC1 | -0,010 | 0,009 | 0,990 | 0,2656 | 13849 | 312143 |                                                                  |                         |
| 274.1  | PRS_PC1 | -0,010 | 0,009 | 0,990 | 0,2656 | 13849 | 312143 | Gout                                                             | endocrine/metabolic     |
| 427    | PRS_PC1 | 0,007  | 0,006 | 1,007 | 0,2667 | 31527 | 294465 | Cardiac dysrhythmias                                             | circulatory system      |
|        |         |        |       |       |        |       |        | Inflammatory bowel disease and other gastroenteritis and colitis | digestive               |
| 555    | PRS_PC1 | 0,014  | 0,013 | 1,014 | 0,2729 | 6652  | 319340 |                                                                  |                         |
| 195    | PRS_PC1 | 0,056  | 0,051 | 1,058 | 0,2729 | 399   | 325593 | Cancer, suspected or other                                       | neoplasms               |
| 378.5  | PRS_PC1 | 0,045  | 0,041 | 1,046 | 0,2754 | 608   | 325384 | Paralytic strabismus                                             | sense organs            |
| 303.1  | PRS_PC1 | 0,071  | 0,065 | 1,074 | 0,2769 | 242   | 325750 | Dissociative disorder                                            | mental disorders        |
|        |         |        |       |       |        |       |        | Other and unspecified disorders of the nervous system            | neurological            |
| 349    | PRS_PC1 | 0,023  | 0,022 | 1,024 | 0,2778 | 2226  | 323766 |                                                                  |                         |
|        |         |        |       |       |        |       |        | Disorders secondary to childbirth, surgery, trauma               | pregnancy complications |
| 617    | PRS_PC1 | -0,066 | 0,061 | 0,936 | 0,2798 | 276   | 325716 |                                                                  |                         |
|        |         |        |       |       |        |       |        | Diffuse diseases of connective tissue                            | dermatologic            |
| 709    | PRS_PC1 | -0,049 | 0,046 | 0,952 | 0,2837 | 489   | 325503 |                                                                  |                         |
|        |         |        |       |       |        |       |        | Other perinatal conditions of fetus or newborn                   | pregnancy complications |
| 656    | PRS_PC1 | 0,065  | 0,061 | 1,068 | 0,2856 | 276   | 325716 |                                                                  |                         |
| 362.7  | PRS_PC1 | -0,020 | 0,019 | 0,980 | 0,2930 | 2905  | 323087 | Hereditary retinal dystrophies                                   | sense organs            |

|        |         |        |       |       |        |       |        |                                                                |                         |
|--------|---------|--------|-------|-------|--------|-------|--------|----------------------------------------------------------------|-------------------------|
| 352.1  | PRS_PC1 | -0,022 | 0,021 | 0,978 | 0,2934 | 2438  | 323554 | Trigeminal nerve disorders [CN5]                               | neurological            |
| 760    | PRS_PC1 | 0,005  | 0,005 | 1,005 | 0,2953 | 56423 | 269569 | Back pain                                                      | symptoms                |
| 401.21 | PRS_PC1 | 0,048  | 0,046 | 1,049 | 0,2969 | 500   | 325492 | Hypertensive heart disease                                     | circulatory system      |
| 256    | PRS_PC1 | -0,027 | 0,026 | 0,973 | 0,2980 | 1541  | 324451 | Ovarian dysfunction                                            | endocrine/metabolic     |
| 172.2  | PRS_PC1 | -0,008 | 0,007 | 0,992 | 0,2987 | 20347 | 305645 | Other non-epithelial cancer of skin                            | neoplasms               |
| 427.2  | PRS_PC1 | 0,007  | 0,007 | 1,007 | 0,2989 | 27180 | 298812 | Atrial fibrillation and flutter                                | circulatory system      |
| 661    | PRS_PC1 | 0,024  | 0,023 | 1,024 | 0,2990 | 2151  | 323841 | Fetal distress and abnormal forces of labor                    | pregnancy complications |
| 386    | PRS_PC1 | -0,011 | 0,011 | 0,989 | 0,3014 | 9452  | 316540 | Vertiginous syndromes and other disorders of vestibular system | sense organs            |
| 378.2  | PRS_PC1 | -0,048 | 0,047 | 0,953 | 0,3025 | 476   | 325516 | Nystagmus and other irregular eye movements                    | sense organs            |
| 202    | PRS_PC1 | -0,023 | 0,023 | 0,977 | 0,3030 | 2041  | 323951 | Cancer of other lymphoid, histiocytic tissue                   | neoplasms               |
| 189    | PRS_PC1 | -0,017 | 0,017 | 0,983 | 0,3043 | 3771  | 322221 | Cancer of urinary organs (incl. kidney and bladder)            | neoplasms               |
| 331.1  | PRS_PC1 | 0,037  | 0,036 | 1,037 | 0,3047 | 811   | 325181 | Hydrocephalus                                                  | neurological            |
| 204.1  | PRS_PC1 | -0,043 | 0,042 | 0,958 | 0,3061 | 600   | 325392 | Lymphoid leukemia                                              | neoplasms               |
| 555.1  | PRS_PC1 | 0,021  | 0,020 | 1,021 | 0,3062 | 2552  | 323440 | Regional enteritis                                             | digestive               |
| 753.1  | PRS_PC1 | 0,067  | 0,066 | 1,069 | 0,3096 | 239   | 325753 | Congenital cataract and lens anomalies                         | congenital anomalies    |
| 202.2  | PRS_PC1 | -0,023 | 0,023 | 0,977 | 0,3113 | 2033  | 323959 | Non-Hodgkins lymphoma                                          | neoplasms               |
| 580.32 | PRS_PC1 | 0,040  | 0,040 | 1,041 | 0,3120 | 647   | 325345 | Nephritis and nephropathy with pathological lesion             | genitourinary           |
| 411.3  | PRS_PC1 | -0,007 | 0,007 | 0,993 | 0,3168 | 27767 | 298225 | Angina pectoris                                                | circulatory system      |
| 275    | PRS_PC1 | 0,014  | 0,014 | 1,014 | 0,3168 | 5621  | 320371 | Disorders of mineral metabolism                                | endocrine/metabolic     |

|        |         |        |       |       |        |       |        |                                                          |                         |
|--------|---------|--------|-------|-------|--------|-------|--------|----------------------------------------------------------|-------------------------|
| 315.2  | PRS_PC1 | 0,069  | 0,069 | 1,071 | 0,3172 | 218   | 325774 | Speech and language disorder                             | mental disorders        |
| 571    | PRS_PC1 | -0,036 | 0,036 | 0,965 | 0,3181 | 792   | 325200 | Chronic liver disease and cirrhosis                      | digestive               |
| 571.8  | PRS_PC1 | -0,036 | 0,036 | 0,965 | 0,3181 | 792   | 325200 | Liver abscess and sequelae of chronic liver disease      | digestive               |
| 506    | PRS_PC1 | 0,019  | 0,019 | 1,019 | 0,3188 | 2984  | 323008 | Empyema and pneumothorax                                 | respiratory             |
| 471    | PRS_PC1 | 0,013  | 0,013 | 1,013 | 0,3190 | 6000  | 319992 | Nasal polyps                                             | respiratory             |
| 636    | PRS_PC1 | 0,020  | 0,020 | 1,020 | 0,3264 | 2711  | 323281 | Early or threatened labor; hemorrhage in early pregnancy | pregnancy complications |
| 590    | PRS_PC1 | 0,018  | 0,019 | 1,018 | 0,3265 | 3008  | 322984 | Pyelonephritis                                           | genitourinary           |
| 733.4  | PRS_PC1 | -0,034 | 0,035 | 0,966 | 0,3272 | 845   | 325147 | Aseptic necrosis of bone                                 | musculoskeletal         |
| 444    | PRS_PC1 | -0,026 | 0,026 | 0,975 | 0,3285 | 1494  | 324498 | Arterial embolism and thrombosis                         | circulatory system      |
| 276    | PRS_PC1 | 0,012  | 0,013 | 1,012 | 0,3286 | 6802  | 319190 | Disorders of fluid, electrolyte, and acid-base balance   | endocrine/metabolic     |
| 276.5  | PRS_PC1 | 0,012  | 0,013 | 1,012 | 0,3286 | 6802  | 319190 | Hypovolemia                                              | endocrine/metabolic     |
| 696.3  | PRS_PC1 | 0,029  | 0,030 | 1,029 | 0,3328 | 1173  | 324819 | Pityriasis                                               | dermatologic            |
| 133    | PRS_PC1 | 0,043  | 0,045 | 1,044 | 0,3345 | 519   | 325473 | Arthropod-borne diseases                                 | infectious diseases     |
| 371.1  | PRS_PC1 | -0,021 | 0,022 | 0,979 | 0,3348 | 2184  | 323808 | Uveitis, noninfectious or NOS                            | sense organs            |
| 202.21 | PRS_PC1 | 0,057  | 0,059 | 1,059 | 0,3356 | 294   | 325698 | Nodular lymphoma                                         | neoplasms               |
| 555.2  | PRS_PC1 | 0,014  | 0,015 | 1,014 | 0,3400 | 4861  | 321131 | Ulcerative colitis                                       | digestive               |
| 939    | PRS_PC1 | -0,009 | 0,009 | 0,991 | 0,3403 | 13391 | 312601 | Atopic/contact dermatitis due to other or unspecified    | dermatologic            |
| 947    | PRS_PC1 | -0,011 | 0,012 | 0,989 | 0,3420 | 7987  | 318005 | Urticaria                                                | dermatologic            |
| 747.13 | PRS_PC1 | -0,064 | 0,067 | 0,938 | 0,3421 | 229   | 325763 | Congenital anomalies of great vessels                    | congenital anomalies    |
| 324    | PRS_PC1 | 0,033  | 0,035 | 1,034 | 0,3425 | 846   | 325146 | Other CNS infection and poliomyelitis                    | neurological            |
| 751    | PRS_PC1 | 0,019  | 0,020 | 1,019 | 0,3428 | 2565  | 323427 | Genitourinary congenital anomalies                       | congenital anomalies    |



|        |         |        |       |       |        |       |        |                                                                                                   |                      |
|--------|---------|--------|-------|-------|--------|-------|--------|---------------------------------------------------------------------------------------------------|----------------------|
| 189.2  | PRS_PC1 | -0,019 | 0,021 | 0,981 | 0,3456 | 2486  | 323506 | Cancer of bladder                                                                                 | neoplasms            |
| 189.11 | PRS_PC1 | -0,028 | 0,030 | 0,973 | 0,3526 | 1181  | 324811 | Malignant neoplasm of kidney,<br>except pelvis                                                    | neoplasms            |
| 459    | PRS_PC1 | -0,045 | 0,048 | 0,956 | 0,3530 | 447   | 325545 | Other disorders of circulatory<br>system                                                          | circulatory system   |
| 459.9  | PRS_PC1 | -0,045 | 0,048 | 0,956 | 0,3530 | 447   | 325545 | Circulatory disease NEC                                                                           | circulatory system   |
| 731    | PRS_PC1 | -0,030 | 0,032 | 0,971 | 0,3540 | 1001  | 324991 | Osteitis deformans and<br>osteopathies associated with<br>other disorders classified<br>elsewhere | musculoskeletal      |
| 464    | PRS_PC1 | 0,007  | 0,008 | 1,007 | 0,3547 | 18137 | 307855 | Acute sinusitis                                                                                   | respiratory          |
| 751.22 | PRS_PC1 | 0,034  | 0,037 | 1,035 | 0,3582 | 755   | 325237 | Other specified congenital<br>anomalies of kidney                                                 | congenital anomalies |
| 430    | PRS_PC1 | 0,018  | 0,020 | 1,018 | 0,3668 | 2683  | 323309 | Intracranial hemorrhage                                                                           | circulatory system   |
| 333    | PRS_PC1 | 0,013  | 0,014 | 1,013 | 0,3670 | 5134  | 320858 | Extrapyramidal disease and<br>abnormal movement disorders                                         | neurological         |
| 562    | PRS_PC1 | 0,005  | 0,005 | 1,005 | 0,3685 | 49921 | 276071 | Diverticulosis and diverticulitis                                                                 | digestive            |
| 562.1  | PRS_PC1 | 0,005  | 0,005 | 1,005 | 0,3685 | 49921 | 276071 | Diverticulosis                                                                                    | digestive            |
| 757    | PRS_PC1 | 0,025  | 0,028 | 1,026 | 0,3702 | 1319  | 324673 | Congenital anomalies of the<br>integument                                                         | congenital anomalies |
| 261.4  | PRS_PC1 | 0,016  | 0,018 | 1,017 | 0,3716 | 3114  | 322878 | Vitamin D deficiency                                                                              | endocrine/metabolic  |
| 270.33 | PRS_PC1 | 0,053  | 0,059 | 1,054 | 0,3722 | 299   | 325693 | Amyloidosis                                                                                       | endocrine/metabolic  |
| 371    | PRS_PC1 | 0,012  | 0,013 | 1,012 | 0,3787 | 6162  | 319830 | Inflammation of the eye                                                                           | sense organs         |
| 575.8  | PRS_PC1 | -0,015 | 0,017 | 0,986 | 0,3797 | 3840  | 322152 | Other disorders of biliary tract                                                                  | digestive            |
| 343    | PRS_PC1 | 0,059  | 0,067 | 1,060 | 0,3819 | 230   | 325762 | Infantile cerebral palsy                                                                          | neurological         |
| 428    | PRS_PC1 | -0,008 | 0,010 | 0,992 | 0,3845 | 12209 | 313783 | Congestive heart failure;<br>nonhypertensive                                                      | circulatory system   |
| 428.2  | PRS_PC1 | -0,008 | 0,010 | 0,992 | 0,3845 | 12209 | 313783 | Heart failure NOS                                                                                 | circulatory system   |
| 290.11 | PRS_PC1 | 0,021  | 0,024 | 1,021 | 0,3861 | 1816  | 324176 | Alzheimer's disease                                                                               | mental disorders     |
| 420.2  | PRS_PC1 | -0,017 | 0,020 | 0,983 | 0,3875 | 2638  | 323354 | Pericarditis                                                                                      | circulatory system   |

|        |         |        |       |       |        |       |        |                                 |                      |
|--------|---------|--------|-------|-------|--------|-------|--------|---------------------------------|----------------------|
| 705    | PRS_PC1 | -0,030 | 0,035 | 0,970 | 0,3885 | 853   | 325139 | Disorders of sweat glands       | dermatologic         |
| 602    | PRS_PC1 | 0,017  | 0,020 | 1,017 | 0,3893 | 2657  | 323335 | Other disorders of prostate     | genitourinary        |
| 697    | PRS_PC1 | -0,024 | 0,027 | 0,977 | 0,3906 | 1384  | 324608 | Sarcoidosis                     | dermatologic         |
| 360    | PRS_PC1 | 0,022  | 0,026 | 1,022 | 0,3956 | 1521  | 324471 | Disorders of the globe          | sense organs         |
|        |         |        |       |       |        |       |        | Congenital anomalies of male    |                      |
| 751.12 | PRS_PC1 | -0,035 | 0,042 | 0,966 | 0,3986 | 603   | 325389 | genital organs                  | congenital anomalies |
|        |         |        |       |       |        |       |        | Erythemasquamous                |                      |
| 690    | PRS_PC1 | 0,010  | 0,012 | 1,010 | 0,4041 | 7026  | 318966 | dermatosis                      | dermatologic         |
| 690.1  | PRS_PC1 | 0,010  | 0,012 | 1,010 | 0,4041 | 7026  | 318966 | Seborrheic dermatitis           | dermatologic         |
| 480.11 | PRS_PC1 | 0,030  | 0,036 | 1,030 | 0,4044 | 801   | 325191 | Pneumococcal pneumonia          | respiratory          |
|        |         |        |       |       |        |       |        | Other hypertrophic and atrophic |                      |
| 701    | PRS_PC1 | -0,009 | 0,010 | 0,991 | 0,4054 | 9929  | 316063 | conditions of skin              | dermatologic         |
|        |         |        |       |       |        |       |        | Congenital anomalies of         |                      |
| 750.14 | PRS_PC1 | 0,058  | 0,070 | 1,060 | 0,4089 | 209   | 325783 | esophagus                       | congenital anomalies |
|        |         |        |       |       |        |       |        | Chorioretinal inflammations,    |                      |
|        |         |        |       |       |        |       |        | scars, and other disorders of   |                      |
| 363    | PRS_PC1 | -0,033 | 0,040 | 0,968 | 0,4120 | 641   | 325351 | choroid                         | sense organs         |
| 580.14 | PRS_PC1 | 0,026  | 0,032 | 1,027 | 0,4133 | 999   | 324993 | Chronic glomerulonephritis, NOS | genitourinary        |
| 344    | PRS_PC1 | 0,026  | 0,032 | 1,026 | 0,4135 | 1044  | 324948 | Other paralytic syndromes       | neurological         |
|        |         |        |       |       |        |       |        | Other demyelinating diseases of |                      |
| 341    | PRS_PC1 | -0,036 | 0,045 | 0,964 | 0,4150 | 519   | 325473 | central nervous system          | neurological         |
| 320    | PRS_PC1 | -0,018 | 0,022 | 0,982 | 0,4171 | 2168  | 323824 | Meningitis                      | neurological         |
| 195.1  | PRS_PC1 | 0,056  | 0,069 | 1,057 | 0,4184 | 220   | 325772 | Malignant neoplasm, other       | neoplasms            |
|        |         |        |       |       |        |       |        | Muscular dystrophies and other  |                      |
| 359    | PRS_PC1 | -0,032 | 0,040 | 0,968 | 0,4186 | 662   | 325330 | myopathies                      | neurological         |
| 359.2  | PRS_PC1 | -0,032 | 0,040 | 0,968 | 0,4186 | 662   | 325330 | Myopathy                        | neurological         |
| 374    | PRS_PC1 | -0,008 | 0,010 | 0,992 | 0,4188 | 10298 | 315694 | Other disorders of eyelids      | sense organs         |
| 198    | PRS_PC1 | -0,044 | 0,054 | 0,957 | 0,4191 | 353   | 325639 | Secondary malignant neoplasm    | neoplasms            |

|        |         |        |       |       |        |      |        |                                                                                                          |                         |
|--------|---------|--------|-------|-------|--------|------|--------|----------------------------------------------------------------------------------------------------------|-------------------------|
| 225.1  | PRS_PC1 | -0,033 | 0,041 | 0,967 | 0,4201 | 614  | 325378 | Benign neoplasm of brain,<br>cranial nerves, meninges                                                    | neoplasms               |
| 420    | PRS_PC1 | -0,013 | 0,017 | 0,987 | 0,4307 | 3714 | 322278 | Carditis                                                                                                 | circulatory system      |
| 182    | PRS_PC1 | 0,020  | 0,025 | 1,020 | 0,4309 | 1622 | 324370 | Malignant neoplasm of uterus<br>Cancer of other female genital<br>organs (excluding uterus and<br>ovary) | neoplasms               |
| 184.2  | PRS_PC1 | 0,038  | 0,048 | 1,038 | 0,4357 | 447  | 325545 | Infertility, female                                                                                      | neoplasms               |
| 626.8  | PRS_PC1 | -0,015 | 0,019 | 0,985 | 0,4376 | 2844 | 323148 | Cervicitis and endocervicitis                                                                            | genitourinary           |
| 614.51 | PRS_PC1 | -0,019 | 0,025 | 0,981 | 0,4386 | 1686 | 324306 | Breast conditions, congenital or<br>relating to hormones                                                 | genitourinary           |
| 612    | PRS_PC1 | -0,019 | 0,024 | 0,981 | 0,4396 | 1743 | 324249 | Benign neoplasm of brain and<br>other parts of nervous system                                            | neoplasms               |
| 225    | PRS_PC1 | -0,030 | 0,039 | 0,970 | 0,4409 | 686  | 325306 | Other disorders of peritoneum                                                                            | digestive               |
| 568    | PRS_PC1 | -0,010 | 0,013 | 0,990 | 0,4417 | 6086 | 319906 | Other disorders of male genital<br>organs                                                                | genitourinary           |
| 608    | PRS_PC1 | 0,008  | 0,011 | 1,009 | 0,4472 | 8883 | 317109 | Disorders of iris and ciliary body                                                                       | sense organs            |
| 379.5  | PRS_PC1 | 0,026  | 0,034 | 1,026 | 0,4489 | 910  | 325082 | Early onset of delivery                                                                                  | pregnancy complications |
| 636.2  | PRS_PC1 | 0,029  | 0,039 | 1,030 | 0,4518 | 697  | 325295 | Intestinal malabsorption (non-<br>celiac)                                                                | digestive               |
| 557    | PRS_PC1 | 0,012  | 0,017 | 1,013 | 0,4525 | 3815 | 322177 | Aplastic anemia                                                                                          | hematopoietic           |
| 284    | PRS_PC1 | -0,023 | 0,031 | 0,977 | 0,4550 | 1067 | 324925 | Prurigo and Lichen                                                                                       | dermatologic            |
| 695.7  | PRS_PC1 | 0,014  | 0,019 | 1,014 | 0,4565 | 3044 | 322948 | Other endocrine disorders                                                                                | endocrine/metabolic     |
| 259    | PRS_PC1 | 0,041  | 0,055 | 1,042 | 0,4566 | 340  | 325652 | Other disorders of purine and<br>pyrimidine metabolism                                                   | endocrine/metabolic     |
| 277.2  | PRS_PC1 | -0,037 | 0,051 | 0,963 | 0,4651 | 396  | 325596 | Other cerebral degenerations                                                                             | neurological            |
| 331    | PRS_PC1 | 0,025  | 0,034 | 1,025 | 0,4663 | 901  | 325091 | Vascular insufficiency of<br>intestine                                                                   | circulatory system      |
| 441    | PRS_PC1 | -0,016 | 0,022 | 0,984 | 0,4685 | 2196 | 323796 | Appendiceal conditions                                                                                   | digestive               |
| 540    | PRS_PC1 | -0,008 | 0,011 | 0,992 | 0,4685 | 8247 | 317745 | Acquired hemolytic anemias                                                                               | hematopoietic           |
| 283    | PRS_PC1 | 0,046  | 0,065 | 1,047 | 0,4733 | 248  | 325744 |                                                                                                          |                         |

|        |         |        |       |       |        |       |        |                                                                                       |                         |
|--------|---------|--------|-------|-------|--------|-------|--------|---------------------------------------------------------------------------------------|-------------------------|
| 622    | PRS_PC1 | -0,006 | 0,009 | 0,994 | 0,4734 | 14305 | 311687 | Polyp of female genital organs                                                        | genitourinary           |
| 622.1  | PRS_PC1 | -0,006 | 0,009 | 0,994 | 0,4734 | 14305 | 311687 | Polyp of corpus uteri                                                                 | genitourinary           |
| 394    | PRS_PC1 | 0,017  | 0,024 | 1,017 | 0,4747 | 1834  | 324158 | Rheumatic disease of the heart<br>valves                                              | circulatory system      |
| 450    | PRS_PC1 | -0,016 | 0,023 | 0,984 | 0,4764 | 2020  | 323972 | Noninfectious disorders of<br>lymphatic channels                                      | circulatory system      |
| 626    | PRS_PC1 | -0,011 | 0,016 | 0,989 | 0,4776 | 4398  | 321594 | Disorders of menstruation and<br>other abnormal bleeding from<br>female genital tract | genitourinary           |
| 204.12 | PRS_PC1 | -0,031 | 0,044 | 0,969 | 0,4789 | 526   | 325466 | Lymphoid leukemia, chronic                                                            | neoplasms               |
| 54     | PRS_PC1 | 0,012  | 0,017 | 1,012 | 0,4800 | 3710  | 322282 | Herpes simplex                                                                        | infectious diseases     |
| 442    | PRS_PC1 | 0,022  | 0,031 | 1,022 | 0,4851 | 1095  | 324897 | Other aneurysm                                                                        | circulatory system      |
| 550.5  | PRS_PC1 | 0,009  | 0,014 | 1,009 | 0,4853 | 5752  | 320240 | Ventral hernia                                                                        | digestive               |
| 527    | PRS_PC1 | 0,013  | 0,020 | 1,014 | 0,4900 | 2743  | 323249 | Diseases of the salivary glands                                                       | digestive               |
| 184.11 | PRS_PC1 | -0,021 | 0,031 | 0,979 | 0,4901 | 1096  | 324896 | Malignant neoplasm of ovary                                                           | neoplasms               |
| 580    | PRS_PC1 | 0,015  | 0,022 | 1,015 | 0,4949 | 2258  | 323734 | Nephritis; nephrosis; renal<br>sclerosis                                              | genitourinary           |
| 652    | PRS_PC1 | 0,034  | 0,049 | 1,034 | 0,4956 | 433   | 325559 | Malposition and malpresentation<br>of fetus or obstruction                            | Pregnancy complications |
| 751.11 | PRS_PC1 | 0,041  | 0,061 | 1,042 | 0,4977 | 278   | 325714 | Congenital anomalies of female<br>genital organs                                      | congenital anomalies    |
| 736    | PRS_PC1 | -0,011 | 0,016 | 0,989 | 0,4983 | 4175  | 321817 | Other acquired deformities of<br>limbs                                                | musculoskeletal         |
| 750.21 | PRS_PC1 | 0,032  | 0,048 | 1,033 | 0,4997 | 451   | 325541 | Congenital anomalies of<br>intestine                                                  | congenital anomalies    |
| 938    | PRS_PC1 | -0,006 | 0,008 | 0,994 | 0,4999 | 15904 | 310088 | Dermatitis due to solar radiation                                                     | dermatologic            |
| 751.1  | PRS_PC1 | -0,022 | 0,032 | 0,979 | 0,5022 | 993   | 324999 | Congenital anomalies of genital<br>organs                                             | congenital anomalies    |

|        |         |        |       |       |        |       |        |                                   |                      |
|--------|---------|--------|-------|-------|--------|-------|--------|-----------------------------------|----------------------|
| 695.41 | PRS_PC1 | 0,038  | 0,057 | 1,039 | 0,5029 | 318   | 325674 | Cutaneous lupus erythematosus     | dermatologic         |
| 110.2  | PRS_PC1 | 0,011  | 0,016 | 1,011 | 0,5042 | 3929  | 322063 | Dermatomycoses                    | infectious diseases  |
| 420.3  | PRS_PC1 | -0,020 | 0,031 | 0,980 | 0,5085 | 1103  | 324889 | Endocarditis                      | circulatory system   |
| 580.1  | PRS_PC1 | 0,021  | 0,032 | 1,021 | 0,5096 | 1011  | 324981 | Glomerulonephritis                | genitourinary        |
| 540.1  | PRS_PC1 | -0,008 | 0,012 | 0,992 | 0,5131 | 7982  | 318010 | Appendicitis                      | digestive            |
|        |         |        |       |       |        |       |        | Cancer of bone and connective     |                      |
| 170    | PRS_PC1 | -0,033 | 0,051 | 0,967 | 0,5134 | 404   | 325588 | tissue                            | neoplasms            |
| 704.11 | PRS_PC1 | 0,027  | 0,042 | 1,028 | 0,5170 | 588   | 325404 | Alopecia Areata                   | dermatologic         |
| 520.2  | PRS_PC1 | 0,014  | 0,022 | 1,014 | 0,5171 | 2191  | 323801 | Disturbances in tooth eruption    | digestive            |
| 245    | PRS_PC1 | 0,021  | 0,033 | 1,022 | 0,5180 | 943   | 325049 | Thyroiditis                       | endocrine/metabolic  |
|        |         |        |       |       |        |       |        | Congenital anomalies of           |                      |
| 747.2  | PRS_PC1 | -0,041 | 0,065 | 0,960 | 0,5265 | 246   | 325746 | peripheral vascular system        | congenital anomalies |
| 170.2  | PRS_PC1 | -0,036 | 0,057 | 0,965 | 0,5283 | 319   | 325673 | Cancer of connective tissue       | neoplasms            |
|        |         |        |       |       |        |       |        | Acute upper respiratory           |                      |
|        |         |        |       |       |        |       |        | infections of multiple or         |                      |
| 465    | PRS_PC1 | 0,003  | 0,005 | 1,003 | 0,5299 | 49522 | 276470 | unspecified sites                 | respiratory          |
|        |         |        |       |       |        |       |        | Cardiac arrest and ventricular    |                      |
| 427.4  | PRS_PC1 | -0,014 | 0,023 | 0,986 | 0,5323 | 2014  | 323978 | fibrillation                      | circulatory system   |
| 427.42 | PRS_PC1 | -0,014 | 0,023 | 0,986 | 0,5323 | 2014  | 323978 | Cardiac arrest                    | circulatory system   |
|        |         |        |       |       |        |       |        | Cardiac shunt/ heart septal       |                      |
| 747.11 | PRS_PC1 | 0,020  | 0,032 | 1,020 | 0,5351 | 1008  | 324984 | defect                            | congenital anomalies |
|        |         |        |       |       |        |       |        | Cancer of liver and intrahepatic  |                      |
| 155    | PRS_PC1 | 0,036  | 0,057 | 1,036 | 0,5353 | 314   | 325678 | bile duct                         | neoplasms            |
| 255    | PRS_PC1 | -0,035 | 0,058 | 0,965 | 0,5384 | 312   | 325680 | Disorders of adrenal glands       | endocrine/metabolic  |
|        |         |        |       |       |        |       |        | Other vitamin B12 deficiency      |                      |
| 281.12 | PRS_PC1 | -0,012 | 0,020 | 0,988 | 0,5386 | 2728  | 323264 | anemia                            | hematopoietic        |
|        |         |        |       |       |        |       |        | Cancer of kidney and renal pelvis |                      |
| 189.1  | PRS_PC1 | -0,018 | 0,029 | 0,983 | 0,5398 | 1255  | 324737 |                                   | neoplasms            |
|        |         |        |       |       |        |       |        | Hypertrophy of breast             |                      |
| 612.2  | PRS_PC1 | -0,015 | 0,025 | 0,985 | 0,5421 | 1639  | 324353 | (Gynecomastia)                    | genitourinary        |

|        |         |        |       |       |        |       |        |                                  |                         |
|--------|---------|--------|-------|-------|--------|-------|--------|----------------------------------|-------------------------|
| 157    | PRS_PC1 | 0,024  | 0,040 | 1,025 | 0,5468 | 643   | 325349 | Pancreatic cancer                | neoplasms               |
|        |         |        |       |       |        |       |        | Complications of labor and       |                         |
| 669    | PRS_PC1 | 0,040  | 0,067 | 1,041 | 0,5471 | 232   | 325760 | delivery NEC                     | pregnancy complications |
| 520    | PRS_PC1 | 0,013  | 0,021 | 1,013 | 0,5475 | 2412  | 323580 | Disorders of tooth development   | digestive               |
| 709.3  | PRS_PC1 | -0,034 | 0,057 | 0,966 | 0,5479 | 315   | 325677 | Systemic sclerosis               | dermatologic            |
| 430.2  | PRS_PC1 | 0,016  | 0,027 | 1,016 | 0,5527 | 1467  | 324525 | Intracerebral hemorrhage         | circulatory system      |
|        |         |        |       |       |        |       |        | Paroxysmal tachycardia,          |                         |
| 427.1  | PRS_PC1 | 0,008  | 0,013 | 1,008 | 0,5533 | 5929  | 320063 | unspecified                      | circulatory system      |
| 079.2  | PRS_PC1 | -0,013 | 0,021 | 0,987 | 0,5549 | 2264  | 323728 | Infectious mononucleosis         | infectious diseases     |
|        |         |        |       |       |        |       |        | Symptoms and disorders of the    |                         |
| 741    | PRS_PC1 | -0,025 | 0,043 | 0,975 | 0,5617 | 559   | 325433 | joints                           | musculoskeletal         |
|        |         |        |       |       |        |       |        | Degenerative skin conditions and |                         |
| 702    | PRS_PC1 | -0,004 | 0,007 | 0,996 | 0,5628 | 23568 | 302424 | other dermatoses                 | dermatologic            |
| 702.2  | PRS_PC1 | -0,004 | 0,007 | 0,996 | 0,5628 | 23568 | 302424 | Seborrheic keratosis             | dermatologic            |
| 008.6  | PRS_PC1 | 0,009  | 0,016 | 1,009 | 0,5671 | 4095  | 321897 | Viral Enteritis                  | infectious diseases     |
| 686.3  | PRS_PC1 | -0,017 | 0,030 | 0,983 | 0,5692 | 1181  | 324811 | Pilonidal cyst                   | dermatologic            |
| 289.4  | PRS_PC1 | -0,019 | 0,034 | 0,981 | 0,5738 | 904   | 325088 | Lymphadenitis                    | hematopoietic           |
| 204    | PRS_PC1 | -0,014 | 0,025 | 0,986 | 0,5777 | 1693  | 324299 | Leukemia                         | neoplasms               |
|        |         |        |       |       |        |       |        | Diseases and other conditions of |                         |
| 529    | PRS_PC1 | -0,010 | 0,019 | 0,990 | 0,5800 | 3037  | 322955 | the tongue                       | digestive               |
| 285.1  | PRS_PC1 | 0,030  | 0,054 | 1,030 | 0,5815 | 349   | 325643 | Acute posthemorrhagic anemia     | hematopoietic           |
|        |         |        |       |       |        |       |        | Retinal vascular changes and     |                         |
| 362.4  | PRS_PC1 | -0,013 | 0,024 | 0,987 | 0,5833 | 1807  | 324185 | abnormalities                    | sense organs            |
| 145    | PRS_PC1 | -0,021 | 0,039 | 0,979 | 0,5851 | 698   | 325294 | Cancer of mouth                  | neoplasms               |
| 585.1  | PRS_PC1 | -0,005 | 0,009 | 0,995 | 0,5851 | 13559 | 312433 | Acute renal failure              | genitourinary           |
| 260    | PRS_PC1 | 0,028  | 0,052 | 1,029 | 0,5852 | 386   | 325606 | Protein-calorie malnutrition     | endocrine/metabolic     |
| 465.4  | PRS_PC1 | 0,010  | 0,018 | 1,010 | 0,5853 | 3356  | 322636 | Acute laryngitis and tracheitis  | respiratory             |
|        |         |        |       |       |        |       |        |                                  |                         |
| 288.1  | PRS_PC1 | -0,008 | 0,014 | 0,992 | 0,5864 | 5460  | 320532 | Decreased white blood cell count | hematopoietic           |
| 288.11 | PRS_PC1 | -0,008 | 0,014 | 0,992 | 0,5864 | 5460  | 320532 | Neutropenia                      | hematopoietic           |

|       |         |        |       |       |        |       |        |                                     |                         |
|-------|---------|--------|-------|-------|--------|-------|--------|-------------------------------------|-------------------------|
| 704   | PRS_PC1 | 0,019  | 0,035 | 1,019 | 0,5936 | 848   | 325144 | Diseases of hair and hair follicles | dermatologic            |
| 281   | PRS_PC1 | -0,010 | 0,018 | 0,990 | 0,5936 | 3248  | 322744 | Other deficiency anemia             | hematopoietic           |
| 281.1 | PRS_PC1 | -0,010 | 0,018 | 0,990 | 0,5936 | 3248  | 322744 | Megaloblastic anemia                | hematopoietic           |
|       |         |        |       |       |        |       |        | Chronic dermatitis due to solar     |                         |
| 938.2 | PRS_PC1 | -0,005 | 0,008 | 0,995 | 0,5948 | 15576 | 310416 | radiation                           | dermatologic            |
| 694.1 | PRS_PC1 | 0,020  | 0,037 | 1,020 | 0,5949 | 771   | 325221 | Vitiligo                            | dermatologic            |
| 41    | PRS_PC1 | -0,007 | 0,013 | 0,993 | 0,5956 | 5801  | 320191 | Bacterial infection NOS             | infectious diseases     |
| 698   | PRS_PC1 | -0,006 | 0,011 | 0,994 | 0,5961 | 9220  | 316772 | Pruritus and related conditions     | dermatologic            |
|       |         |        |       |       |        |       |        | Pulmonary congestion and            |                         |
| 503   | PRS_PC1 | 0,018  | 0,035 | 1,018 | 0,6068 | 851   | 325141 | hypostasis                          | respiratory             |
|       |         |        |       |       |        |       |        | Pelvic inflammatory disease         |                         |
| 614.3 | PRS_PC1 | -0,018 | 0,036 | 0,982 | 0,6105 | 817   | 325175 | (PID)                               | genitourinary           |
| 199   | PRS_PC1 | 0,028  | 0,056 | 1,029 | 0,6119 | 336   | 325656 | Neoplasm of uncertain behavior      | neoplasms               |
| 381.2 | PRS_PC1 | -0,008 | 0,017 | 0,992 | 0,6173 | 3725  | 322267 | Eustachian tube disorders           | sense organs            |
| 277   | PRS_PC1 | -0,013 | 0,027 | 0,987 | 0,6181 | 1455  | 324537 | Other disorders of metabolism       | endocrine/metabolic     |
|       |         |        |       |       |        |       |        | Malignant and unknown               |                         |
|       |         |        |       |       |        |       |        | neoplasms of brain and nervous      |                         |
| 191   | PRS_PC1 | 0,019  | 0,039 | 1,020 | 0,6183 | 686   | 325306 | system                              | neoplasms               |
| 615   | PRS_PC1 | 0,006  | 0,012 | 1,006 | 0,6217 | 7556  | 318436 | Endometriosis                       | genitourinary           |
| 651   | Z_prs1r | 0,023  | 0,046 | 1,023 | 0,6217 | 480   | 325512 | Multiple gestation                  | pregnancy complications |
| 185   | PRS_PC1 | -0,006 | 0,012 | 0,994 | 0,6284 | 8234  | 317758 | Cancer of prostate                  | neoplasms               |
| 722   | PRS_PC1 | -0,008 | 0,017 | 0,992 | 0,6290 | 3547  | 322445 | Intervertebral disc disorders       | musculoskeletal         |
|       |         |        |       |       |        |       |        | Other and unspecified disc          |                         |
| 722.9 | PRS_PC1 | -0,008 | 0,017 | 0,992 | 0,6290 | 3547  | 322445 | disorder                            | musculoskeletal         |
|       |         |        |       |       |        |       |        | Malignant neoplasm of other and     |                         |
|       |         |        |       |       |        |       |        | ill-defined sites within the        |                         |
| 159   | PRS_PC1 | 0,021  | 0,044 | 1,022 | 0,6290 | 532   | 325460 | digestive organs and peritoneum     | neoplasms               |

|        |         |        |       |       |        |      |        |                                  |                      |
|--------|---------|--------|-------|-------|--------|------|--------|----------------------------------|----------------------|
| 361    | PRS_PC1 | 0,007  | 0,014 | 1,007 | 0,6347 | 5559 | 320433 | Retinal detachments and defects  | sense organs         |
|        |         |        |       |       |        |      |        | Retinal detachment with retinal  |                      |
| 361.1  | PRS_PC1 | 0,007  | 0,014 | 1,007 | 0,6347 | 5559 | 320433 | defect                           | sense organs         |
|        |         |        |       |       |        |      |        | Thyrotoxicosis with or without   |                      |
| 242    | PRS_PC1 | -0,006 | 0,014 | 0,994 | 0,6362 | 5808 | 320184 | goiter                           | endocrine/metabolic  |
| 540.11 | PRS_PC1 | 0,008  | 0,016 | 1,008 | 0,6404 | 3980 | 322012 | Acute appendicitis               | digestive            |
| 193    | PRS_PC1 | -0,020 | 0,043 | 0,980 | 0,6433 | 554  | 325438 | Thyroid cancer                   | neoplasms            |
| 389    | PRS_PC1 | -0,006 | 0,013 | 0,994 | 0,6485 | 6236 | 319756 | Hearing loss                     | sense organs         |
|        |         |        |       |       |        |      |        | Arthropathy associated with      |                      |
|        |         |        |       |       |        |      |        | other disorders classified       |                      |
| 713    | PRS_PC1 | 0,033  | 0,072 | 1,033 | 0,6494 | 202  | 325790 | elsewhere                        | musculoskeletal      |
| 480.1  | PRS_PC1 | 0,015  | 0,033 | 1,015 | 0,6503 | 980  | 325012 | Bacterial pneumonia              | respiratory          |
| 257    | PRS_PC1 | -0,022 | 0,049 | 0,979 | 0,6557 | 438  | 325554 | Testicular dysfunction           | endocrine/metabolic  |
|        |         |        |       |       |        |      |        | Degenerative disease of the      |                      |
| 334    | PRS_PC1 | -0,011 | 0,024 | 0,989 | 0,6567 | 1743 | 324249 | spinal cord                      | neurological         |
|        |         |        |       |       |        |      |        | Other infectious and parasitic   |                      |
| 136    | PRS_PC1 | 0,016  | 0,037 | 1,016 | 0,6619 | 741  | 325251 | diseases                         | infectious diseases  |
| 704.2  | PRS_PC1 | 0,024  | 0,055 | 1,024 | 0,6634 | 346  | 325646 | Hirsutism                        | dermatologic         |
| 130    | PRS_PC1 | -0,027 | 0,062 | 0,974 | 0,6694 | 268  | 325724 | Spirochetal infection            | infectious diseases  |
| 117    | PRS_PC1 | -0,016 | 0,038 | 0,984 | 0,6704 | 705  | 325287 | Mycoses                          | infectious diseases  |
|        |         |        |       |       |        |      |        | Disorders of optic nerve and     |                      |
| 377    | PRS_PC1 | 0,022  | 0,051 | 1,022 | 0,6725 | 392  | 325600 | visual pathways                  | sense organs         |
| 377.3  | PRS_PC1 | 0,022  | 0,051 | 1,022 | 0,6725 | 392  | 325600 | Optic neuritis/neuropathy        | sense organs         |
| 752.1  | PRS_PC1 | 0,024  | 0,057 | 1,024 | 0,6752 | 313  | 325679 | Neural tube defects              | congenital anomalies |
| 255.1  | PRS_PC1 | -0,025 | 0,060 | 0,975 | 0,6765 | 289  | 325703 | Adrenal hyperfunction            | endocrine/metabolic  |
|        |         |        |       |       |        |      |        |                                  |                      |
| 401.3  | PRS_PC1 | -0,030 | 0,072 | 0,971 | 0,6770 | 202  | 325790 | Other hypertensive complications | circulatory system   |
| 430.1  | PRS_PC1 | 0,011  | 0,027 | 1,011 | 0,6776 | 1397 | 324595 | Subarachnoid hemorrhage          | circulatory system   |



|        |         |        |       |       |        |       |        |                                                                 |                     |
|--------|---------|--------|-------|-------|--------|-------|--------|-----------------------------------------------------------------|---------------------|
| 184.1  | PRS_PC1 | -0,012 | 0,030 | 0,988 | 0,6781 | 1189  | 324803 | Malignant neoplasm of ovary and other uterine adnexa            | neoplasms           |
| 496.3  | PRS_PC1 | 0,006  | 0,015 | 1,006 | 0,6787 | 4493  | 321499 | Bronchiectasis                                                  | respiratory         |
| 200    | PRS_PC1 | -0,017 | 0,041 | 0,983 | 0,6822 | 603   | 325389 | Myeloproliferative disease                                      | neoplasms           |
| 364    | PRS_PC1 | -0,008 | 0,019 | 0,992 | 0,6877 | 2754  | 323238 | Corneal opacity and other disorders of cornea                   | sense organs        |
| 90     | PRS_PC1 | 0,027  | 0,068 | 1,028 | 0,6898 | 221   | 325771 | Sexually transmitted infections (not HIV or hepatitis)          | infectious diseases |
| 938.1  | PRS_PC1 | 0,023  | 0,058 | 1,023 | 0,6910 | 304   | 325688 | Acute dermatitis due to solar radiation                         | dermatologic        |
| 594.8  | PRS_PC1 | -0,006 | 0,016 | 0,994 | 0,6940 | 4368  | 321624 | Renal colic                                                     | genitourinary       |
| 150    | PRS_PC1 | -0,015 | 0,039 | 0,985 | 0,6972 | 694   | 325298 | Cancer of esophagus                                             | neoplasms           |
| 704.1  | PRS_PC1 | 0,014  | 0,036 | 1,014 | 0,7033 | 822   | 325170 | Alopecia                                                        | dermatologic        |
| 695.1  | PRS_PC1 | -0,025 | 0,067 | 0,975 | 0,7048 | 234   | 325758 | Toxic erythema                                                  | dermatologic        |
| 281.13 | PRS_PC1 | 0,016  | 0,043 | 1,016 | 0,7055 | 571   | 325421 | Folate-deficiency anemia                                        | hematopoietic       |
| 580.3  | PRS_PC1 | -0,011 | 0,028 | 0,989 | 0,7062 | 1281  | 324711 | Nephritis and nephropathy without mention of glomerulonephritis | genitourinary       |
| 201    | PRS_PC1 | 0,020  | 0,052 | 1,020 | 0,7068 | 384   | 325608 | Hodgkin's disease                                               | neoplasms           |
| 604    | PRS_PC1 | -0,007 | 0,018 | 0,993 | 0,7073 | 3120  | 322872 | Disorders of penis                                              | genitourinary       |
| 604.1  | PRS_PC1 | -0,007 | 0,018 | 0,993 | 0,7073 | 3120  | 322872 | Redundant prepuce and phimosis/BXO                              | genitourinary       |
| 132    | PRS_PC1 | 0,008  | 0,022 | 1,008 | 0,7130 | 2091  | 323901 | Infestation (lice, mites)                                       | infectious diseases |
| 289    | PRS_PC1 | -0,009 | 0,024 | 0,991 | 0,7157 | 1825  | 324167 | Other diseases of blood and blood-forming organs                | hematopoietic       |
| 110    | PRS_PC1 | 0,002  | 0,007 | 1,002 | 0,7166 | 25503 | 300489 | Dermatophytosis / Dermatomycosis                                | infectious diseases |
| 288.2  | PRS_PC1 | 0,011  | 0,031 | 1,011 | 0,7186 | 1056  | 324936 | Elevated white blood cell count                                 | hematopoietic       |
| 614.5  | PRS_PC1 | 0,006  | 0,017 | 1,006 | 0,7224 | 3817  | 322175 | Inflammatory disease of cervix, vagina, and vulva               | genitourinary       |

|        |         |        |       |       |        |       |        |                                   |                         |
|--------|---------|--------|-------|-------|--------|-------|--------|-----------------------------------|-------------------------|
| 78     | PRS_PC1 | -0,003 | 0,009 | 0,997 | 0,7244 | 12686 | 313306 | Viral warts & HPV                 | infectious diseases     |
|        |         |        |       |       |        |       |        | Other specified benign            |                         |
| 610.8  | PRS_PC1 | 0,004  | 0,011 | 1,004 | 0,7288 | 9134  | 316858 | mammary dysplasias                | genitourinary           |
|        |         |        |       |       |        |       |        | Problems associated with          |                         |
| 653    | PRS_PC1 | -0,010 | 0,029 | 0,990 | 0,7292 | 1322  | 324670 | amniotic cavity and membranes     | pregnancy complications |
|        |         |        |       |       |        |       |        | Cardiac and circulatory           |                         |
| 747    | PRS_PC1 | -0,007 | 0,021 | 0,993 | 0,7293 | 2341  | 323651 | congenital anomalies              | congenital anomalies    |
| 577    | PRS_PC1 | 0,006  | 0,017 | 1,006 | 0,7325 | 3441  | 322551 | Diseases of pancreas              | digestive               |
| 577.1  | PRS_PC1 | 0,006  | 0,017 | 1,006 | 0,7325 | 3441  | 322551 | Acute pancreatitis                | digestive               |
|        |         |        |       |       |        |       |        | Cancer of other male genital      |                         |
| 187    | PRS_PC1 | 0,011  | 0,034 | 1,011 | 0,7393 | 918   | 325074 | organs                            | neoplasms               |
|        |         |        |       |       |        |       |        | Disorders of the autonomic        |                         |
| 337    | PRS_PC1 | 0,014  | 0,044 | 1,014 | 0,7437 | 539   | 325453 | nervous system                    | neurological            |
|        |         |        |       |       |        |       |        | Other acquired musculoskeletal    |                         |
| 738    | PRS_PC1 | 0,008  | 0,025 | 1,008 | 0,7455 | 1690  | 324302 | deformity                         | musculoskeletal         |
| 352.2  | PRS_PC1 | 0,006  | 0,020 | 1,007 | 0,7458 | 2609  | 323383 | Facial nerve disorders [CN7]      | neurological            |
|        |         |        |       |       |        |       |        | Umbilical cord complications      |                         |
| 663    | Z_prs1r | 0,013  | 0,042 | 1,013 | 0,7492 | 610   | 325382 | during labor and delivery         | pregnancy complications |
| 394.2  | PRS_PC1 | -0,013 | 0,041 | 0,987 | 0,7506 | 621   | 325371 | Mitral valve disease              | circulatory system      |
|        |         |        |       |       |        |       |        | Antepartum hemorrhage,            |                         |
|        |         |        |       |       |        |       |        | abruptio placentae, and placenta  |                         |
| 635.2  | PRS_PC1 | 0,011  | 0,035 | 1,011 | 0,7547 | 873   | 325119 | previa                            | pregnancy complications |
| 187.2  | PRS_PC1 | 0,013  | 0,041 | 1,013 | 0,7593 | 614   | 325378 | Malignant neoplasm of testis      | neoplasms               |
| 202.24 | PRS_PC1 | 0,012  | 0,040 | 1,012 | 0,7595 | 642   | 325350 | Large cell lymphoma               | neoplasms               |
| 352    | PRS_PC1 | -0,004 | 0,014 | 0,996 | 0,7609 | 5341  | 320651 | Disorders of other cranial nerves | neurological            |
| 707    | PRS_PC1 | 0,004  | 0,014 | 1,004 | 0,7631 | 5101  | 320891 | Chronic ulcer of skin             | dermatologic            |
| 420.21 | PRS_PC1 | -0,013 | 0,044 | 0,987 | 0,7633 | 533   | 325459 | Acute pericarditis                | circulatory system      |
|        |         |        |       |       |        |       |        | Diabetes or abnormal glucose      |                         |
|        |         |        |       |       |        |       |        | tolerance complicating            |                         |
| 649.1  | PRS_PC1 | -0,014 | 0,046 | 0,986 | 0,7638 | 487   | 325505 | pregnancy                         | pregnancy complications |

|        |         |        |       |       |        |       |        |                                   |                      |
|--------|---------|--------|-------|-------|--------|-------|--------|-----------------------------------|----------------------|
| 383    | PRS_PC1 | -0,011 | 0,036 | 0,989 | 0,7654 | 795   | 325197 | Otosclerosis                      | sense organs         |
|        |         |        |       |       |        |       |        | Inflammatory and toxic            |                      |
| 357    | PRS_PC1 | -0,007 | 0,025 | 0,993 | 0,7685 | 1610  | 324382 | neuropathy                        | neurological         |
|        |         |        |       |       |        |       |        | Nonrheumatic tricuspid valve      |                      |
| 395.3  | PRS_PC1 | 0,016  | 0,055 | 1,016 | 0,7748 | 342   | 325650 | disorders                         | circulatory system   |
|        |         |        |       |       |        |       |        | Cancer of other female genital    |                      |
| 184    | PRS_PC1 | 0,007  | 0,025 | 1,007 | 0,7841 | 1690  | 324302 | organs                            | neoplasms            |
|        |         |        |       |       |        |       |        | Other disorders of middle ear     |                      |
| 385    | PRS_PC1 | -0,008 | 0,029 | 0,992 | 0,7863 | 1225  | 324767 | and mastoid                       | sense organs         |
| 755.1  | PRS_PC1 | 0,009  | 0,035 | 1,009 | 0,7869 | 864   | 325128 | Congenital deformities of feet    | congenital anomalies |
|        |         |        |       |       |        |       |        | Esophageal bleeding               |                      |
| 530.2  | PRS_PC1 | 0,009  | 0,034 | 1,009 | 0,7872 | 876   | 325116 | (varices/hemorrhage)              | digestive            |
| 362    | PRS_PC1 | -0,002 | 0,009 | 0,998 | 0,7874 | 14508 | 311484 | Other retinal disorders           | sense organs         |
| 465.2  | PRS_PC1 | 0,002  | 0,008 | 1,002 | 0,7928 | 17246 | 308746 | Acute pharyngitis                 | respiratory          |
|        |         |        |       |       |        |       |        |                                   |                      |
| 521    | PRS_PC1 | 0,004  | 0,016 | 1,004 | 0,7972 | 4312  | 321680 | Diseases of hard tissues of teeth | digestive            |
| 521.1  | PRS_PC1 | 0,004  | 0,016 | 1,004 | 0,7972 | 4312  | 321680 | Dental caries                     | digestive            |
| 395    | PRS_PC1 | 0,003  | 0,010 | 1,003 | 0,8035 | 10461 | 315531 | Heart valve disorders             | circulatory system   |
|        |         |        |       |       |        |       |        | Anatomical abnormatilies of       |                      |
| 586.1  | PRS_PC1 | -0,013 | 0,052 | 0,987 | 0,8065 | 384   | 325608 | kidney and ureters                | genitourinary        |
| 586.11 | PRS_PC1 | -0,013 | 0,052 | 0,987 | 0,8065 | 384   | 325608 | Small kidney                      | genitourinary        |
| 753    | PRS_PC1 | -0,011 | 0,044 | 0,989 | 0,8094 | 542   | 325450 | Congenital anomalies of the eye   | congenital anomalies |
|        |         |        |       |       |        |       |        | Male infertility and abnormal     |                      |
| 609    | PRS_PC1 | -0,012 | 0,052 | 0,988 | 0,8127 | 377   | 325615 | spermatozoa                       | genitourinary        |
| 609.1  | PRS_PC1 | -0,012 | 0,052 | 0,988 | 0,8127 | 377   | 325615 | Infertility, male                 | genitourinary        |
| 695.2  | PRS_PC1 | 0,015  | 0,067 | 1,016 | 0,8174 | 232   | 325760 | Bullous dermatoses                | dermatologic         |
| 151    | PRS_PC1 | 0,010  | 0,047 | 1,010 | 0,8235 | 479   | 325513 | Cancer of stomach                 | neoplasms            |
| 38     | PRS_PC1 | -0,009 | 0,043 | 0,991 | 0,8251 | 572   | 325420 | Septicemia                        | infectious diseases  |
| 038.1  | PRS_PC1 | -0,009 | 0,043 | 0,991 | 0,8251 | 572   | 325420 | Gram negative septicemia          | infectious diseases  |
| 601.3  | PRS_PC1 | 0,005  | 0,022 | 1,005 | 0,8257 | 2257  | 323735 | Orchitis and epididymitis         | genitourinary        |

|        |         |        |       |       |        |       |        |                                     |                         |
|--------|---------|--------|-------|-------|--------|-------|--------|-------------------------------------|-------------------------|
|        |         |        |       |       |        |       |        | Aphakia and other disorders of      |                         |
| 379.3  | PRS_PC1 | -0,010 | 0,047 | 0,990 | 0,8299 | 474   | 325518 | lens                                | sense organs            |
| 339    | PRS_PC1 | 0,003  | 0,016 | 1,003 | 0,8359 | 4368  | 321624 | Other headache syndromes            | neurological            |
| 070.4  | PRS_PC1 | 0,014  | 0,068 | 1,014 | 0,8385 | 227   | 325765 | Chronic hepatitis                   | infectious diseases     |
|        |         |        |       |       |        |       |        | Congenital anomalies of             |                         |
| 753.2  | PRS_PC1 | 0,014  | 0,071 | 1,014 | 0,8399 | 206   | 325786 | posterior segment of eye            | congenital anomalies    |
| 288    | PRS_PC1 | 0,006  | 0,031 | 1,006 | 0,8409 | 1075  | 324917 | Diseases of white blood cells       | hematopoietic           |
| 370    | PRS_PC1 | 0,006  | 0,029 | 1,006 | 0,8450 | 1268  | 324724 | Keratitis                           | sense organs            |
| 381.3  | PRS_PC1 | -0,013 | 0,068 | 0,987 | 0,8499 | 226   | 325766 | Mastoiditis & related conditions    | sense organs            |
|        |         |        |       |       |        |       |        |                                     |                         |
| 483    | PRS_PC1 | 0,003  | 0,016 | 1,003 | 0,8527 | 4138  | 321854 | Acute bronchitis and bronchiolitis  | respiratory             |
| 364.1  | PRS_PC1 | 0,010  | 0,056 | 1,010 | 0,8544 | 330   | 325662 | Corneal opacity                     | sense organs            |
| 246    | PRS_PC1 | 0,004  | 0,024 | 1,004 | 0,8594 | 1774  | 324218 | Other disorders of thyroid          | endocrine/metabolic     |
|        |         |        |       |       |        |       |        | Cancer of brain and nervous         |                         |
| 191.1  | PRS_PC1 | -0,007 | 0,042 | 0,993 | 0,8603 | 583   | 325409 | system                              | neoplasms               |
| 510    | PRS_PC1 | 0,009  | 0,054 | 1,009 | 0,8618 | 355   | 325637 | Other diseases of lung              | respiratory             |
| 474.1  | PRS_PC1 | -0,002 | 0,010 | 0,998 | 0,8631 | 11445 | 314547 | Acute tonsillitis                   | respiratory             |
| 191.11 | PRS_PC1 | 0,007  | 0,044 | 1,007 | 0,8679 | 544   | 325448 | Cancer of brain                     | neoplasms               |
|        |         |        |       |       |        |       |        | Nonrheumatic pulmonary valve        |                         |
| 395.4  | PRS_PC1 | -0,008 | 0,049 | 0,992 | 0,8698 | 430   | 325562 | disorders                           | circulatory system      |
|        |         |        |       |       |        |       |        | Hemorrhage during pregnancy;        |                         |
| 635    | PRS_PC1 | 0,003  | 0,022 | 1,003 | 0,8740 | 2266  | 323726 | childbirth and postpartum           | pregnancy complications |
|        |         |        |       |       |        |       |        | Neoplasm of unspecified nature      |                         |
| 158    | PRS_PC1 | -0,008 | 0,052 | 0,992 | 0,8762 | 386   | 325606 | of digestive system                 | neoplasms               |
|        |         |        |       |       |        |       |        | Respiratory failure, insufficiency, |                         |
| 509    | PRS_PC1 | 0,009  | 0,059 | 1,009 | 0,8789 | 302   | 325690 | arrest                              | respiratory             |
| 509.2  | PRS_PC1 | 0,009  | 0,059 | 1,009 | 0,8789 | 302   | 325690 | Respiratory insufficiency           | respiratory             |
|        |         |        |       |       |        |       |        | Other and unspecified               |                         |
| 286.7  | PRS_PC1 | -0,004 | 0,024 | 0,996 | 0,8794 | 1872  | 324120 | coagulation defects                 | hematopoietic           |

|        |         |        |       |       |        |       |        |                                   |                         |
|--------|---------|--------|-------|-------|--------|-------|--------|-----------------------------------|-------------------------|
|        |         |        |       |       |        |       |        | Infections of genitourinary tract |                         |
| 647.1  | PRS_PC1 | 0,010  | 0,066 | 1,010 | 0,8799 | 239   | 325753 | during pregnancy                  | pregnancy complications |
| 695.42 | PRS_PC1 | 0,005  | 0,039 | 1,006 | 0,8873 | 689   | 325303 | Systemic lupus erythematosus      | dermatologic            |
|        |         |        |       |       |        |       |        | Placenta previa and abruptio      |                         |
| 635.3  | PRS_PC1 | -0,004 | 0,026 | 0,996 | 0,8897 | 1532  | 324460 | placenta                          | pregnancy complications |
|        |         |        |       |       |        |       |        | Irregular menstrual               |                         |
| 626.1  | PRS_PC1 | -0,003 | 0,025 | 0,997 | 0,8899 | 1660  | 324332 | cycle/bleeding                    | genitourinary           |
|        |         |        |       |       |        |       |        | Absent or infrequent              |                         |
| 626.11 | PRS_PC1 | -0,003 | 0,025 | 0,997 | 0,8899 | 1660  | 324332 | menstruation                      | genitourinary           |
|        |         |        |       |       |        |       |        | Other disorders of the kidney and |                         |
| 586    | PRS_PC1 | -0,007 | 0,049 | 0,993 | 0,8907 | 425   | 325567 | ureters                           | genitourinary           |
|        |         |        |       |       |        |       |        | Strabismus and other disorders    |                         |
| 378    | PRS_PC1 | 0,004  | 0,029 | 1,004 | 0,8930 | 1236  | 324756 | of binocular eye movements        | sense organs            |
| 474    | PRS_PC1 | -0,001 | 0,009 | 0,999 | 0,8932 | 13145 | 312847 | Acute and chronic tonsillitis     | respiratory             |
| 752.11 | PRS_PC1 | 0,008  | 0,058 | 1,008 | 0,8939 | 303   | 325689 | Spina bifida                      | congenital anomalies    |
| 286    | PRS_PC1 | 0,003  | 0,023 | 1,003 | 0,8941 | 2000  | 323992 | Coagulation defects               | hematopoietic           |
| 376    | PRS_PC1 | -0,004 | 0,035 | 0,996 | 0,8968 | 867   | 325125 | Disorders of the orbit            | sense organs            |
| 695.4  | PRS_PC1 | 0,004  | 0,035 | 1,004 | 0,9130 | 857   | 325135 | Lupus (localized and systemic)    | dermatologic            |
| 479    | PRS_PC1 | 0,003  | 0,027 | 1,003 | 0,9138 | 1415  | 324577 | Other upper respiratory disease   | respiratory             |
| 286.6  | PRS_PC1 | -0,002 | 0,023 | 0,998 | 0,9176 | 1934  | 324058 | Defibrination syndrome            | hematopoietic           |
|        |         |        |       |       |        |       |        | Other symptoms of respiratory     |                         |
| 512    | PRS_PC1 | -0,001 | 0,009 | 0,999 | 0,9213 | 14719 | 311273 | system                            | respiratory             |
|        |         |        |       |       |        |       |        | Other disorders of arteries and   |                         |
| 447    | PRS_PC1 | -0,002 | 0,020 | 0,998 | 0,9225 | 2489  | 323503 | arterioles                        | circulatory system      |
| 458    | PRS_PC1 | -0,001 | 0,009 | 0,999 | 0,9241 | 12924 | 313068 | Hypotension                       | circulatory system      |
| 458.9  | PRS_PC1 | -0,001 | 0,009 | 0,999 | 0,9241 | 12924 | 313068 | Hypotension NOS                   | circulatory system      |
| 53     | PRS_PC1 | 0,001  | 0,010 | 1,001 | 0,9265 | 11873 | 314119 | Herpes zoster                     | infectious diseases     |
|        |         |        |       |       |        |       |        | Inflammatory diseases of female   |                         |
| 614    | PRS_PC1 | 0,001  | 0,015 | 1,001 | 0,9272 | 4600  | 321392 | pelvic organs                     | genitourinary           |

|        |         |        |       |       |        |       |                                           |                         |
|--------|---------|--------|-------|-------|--------|-------|-------------------------------------------|-------------------------|
|        |         |        |       |       |        |       | Other disorders of stomach and            |                         |
| 537    | PRS_PC1 | 0,001  | 0,009 | 1,001 | 0,9327 | 14141 | 311851 duodenum                           | digestive               |
| 149.1  | PRS_PC1 | 0,005  | 0,064 | 1,005 | 0,9334 | 251   | 325741 Cancer of oropharynx               | neoplasms               |
|        |         |        |       |       |        |       | Osteitis deformans [Paget's               |                         |
| 731.1  | PRS_PC1 | 0,004  | 0,052 | 1,004 | 0,9351 | 380   | 325612 disease of bone]                   | musculoskeletal         |
| 747.1  | PRS_PC1 | -0,002 | 0,023 | 0,998 | 0,9359 | 1963  | 324029 Cardiac congenital anomalies       | congenital anomalies    |
| 643    | PRS_PC1 | -0,004 | 0,061 | 0,996 | 0,9439 | 277   | 325715 Excessive vomiting in pregnancy    | pregnancy complications |
|        |         |        |       |       |        |       | Other local infections of skin and        |                         |
| 686    | PRS_PC1 | 0,001  | 0,010 | 1,001 | 0,9464 | 11521 | 314471 subcutaneous tissue                | dermatologic            |
|        |         |        |       |       |        |       | Nonrheumatic mitral valve                 |                         |
| 395.1  | PRS_PC1 | -0,001 | 0,015 | 0,999 | 0,9546 | 5006  | 320986 disorders                          | circulatory system      |
| 335    | PRS_PC1 | 0,001  | 0,023 | 1,001 | 0,9567 | 1947  | 324045 Multiple sclerosis                 | neurological            |
| 385.3  | PRS_PC1 | -0,002 | 0,041 | 0,998 | 0,9574 | 602   | 325390 Cholesteatoma                      | sense organs            |
|        |         |        |       |       |        |       | Nonrheumatic aortic valve                 |                         |
| 395.2  | PRS_PC1 | -0,001 | 0,014 | 0,999 | 0,9642 | 5550  | 320442 disorders                          | circulatory system      |
| 285    | PRS_PC1 | 0,000  | 0,007 | 1,000 | 0,9644 | 22384 | 303608 Other anemias                      | hematopoietic           |
| 110.1  | PRS_PC1 | 0,000  | 0,007 | 1,000 | 0,9666 | 22872 | 303120 Dermatophytosis                    | infectious diseases     |
| 695.22 | PRS_PC1 | 0,002  | 0,067 | 1,002 | 0,9714 | 231   | 325761 Pemphigus and pemphigoid           | dermatologic            |
| 353    | PRS_PC1 | 0,000  | 0,012 | 1,000 | 0,9784 | 7496  | 318496 Nerve root and plexus disorders    | neurological            |
| 153.2  | PRS_PC1 | 0,000  | 0,018 | 1,000 | 0,9807 | 3364  | 322628 Colon cancer                       | neoplasms               |
| 117.4  | PRS_PC1 | -0,001 | 0,057 | 0,999 | 0,9869 | 317   | 325675 Aspergillosis                      | infectious diseases     |
|        |         |        |       |       |        |       | Diseases of the larynx and vocal          |                         |
| 473    | PRS_PC1 | -0,001 | 0,048 | 0,999 | 0,9891 | 442   | 325550 cords                              | respiratory             |
| 473.1  | PRS_PC1 | -0,001 | 0,048 | 0,999 | 0,9891 | 442   | 325550 Chronic laryngitis                 | respiratory             |
| 681    | PRS_PC1 | 0,000  | 0,007 | 1,000 | 0,9907 | 24136 | 301856 Superficial cellulitis and abscess | dermatologic            |
| 345.1  | PRS_PC1 | 0,001  | 0,063 | 1,001 | 0,9927 | 258   | 325734 Epilepsy                           | neurological            |
| 550.1  | PRS_PC1 | 0,000  | 0,007 | 1,000 | 0,9996 | 24263 | 301729 Inguinal hernia                    | digestive               |
|        |         |        |       |       |        |       | Osteomyelitis, periostitis, and           |                         |
| 710    | PRS_PC1 | 0,000  | 0,023 | 1,000 | 0,9998 | 1896  | 324096 other infections involving bone    | musculoskeletal         |
| 710.1  | PRS_PC1 | 0,000  | 0,023 | 1,000 | 0,9998 | 1896  | 324096 Osteomyelitis                      | musculoskeletal         |

|        |         |       |       |       |        |      |        |                           |                 |
|--------|---------|-------|-------|-------|--------|------|--------|---------------------------|-----------------|
| 710.19 | PRS_PC1 | 0,000 | 0,023 | 1,000 | 0,9998 | 1896 | 324096 | Unspecified osteomyelitis | musculoskeletal |
|--------|---------|-------|-------|-------|--------|------|--------|---------------------------|-----------------|

**Sheet 2 Results from the sensitivity analysis on inpatient diagnoses only**

| phenotype | snp     | beta   | SE    | OR    | p        | n_cases | n_controls | description                      | group                 |
|-----------|---------|--------|-------|-------|----------|---------|------------|----------------------------------|-----------------------|
| 300       | PRS_PC1 | 0,106  | 0,008 | 1,112 | 8,03E-38 | 16074   | 316781     | Anxiety disorders                | mental disorders      |
| 296       | PRS_PC1 | 0,313  | 0,026 | 1,367 | 1,89E-34 | 1595    | 331260     | Mood disorders                   | mental disorders      |
| 300.1     | PRS_PC1 | 0,102  | 0,008 | 1,107 | 1,93E-33 | 15310   | 317545     | Anxiety disorder                 | mental disorders      |
| 296.1     | PRS_PC1 | 0,357  | 0,030 | 1,429 | 2,11E-33 | 1185    | 331670     | Bipolar                          | mental disorders      |
| 297.2     | PRS_PC1 | 0,244  | 0,026 | 1,277 | 2,80E-20 | 1484    | 331371     | Suicide or self-inflicted injury | mental disorders      |
| 297       | PRS_PC1 | 0,239  | 0,026 | 1,270 | 1,04E-19 | 1508    | 331347     | Suicidal ideation or attempt     | mental disorders      |
| 318       | PRS_PC1 | 0,056  | 0,007 | 1,057 | 1,23E-16 | 25001   | 307854     | Tobacco use disorder             | mental disorders      |
|           |         |        |       |       |          |         |            | Poisoning by psychotropic        |                       |
| 969       | PRS_PC1 | 0,173  | 0,022 | 1,189 | 2,52E-15 | 2171    | 330684     | agents                           | injuries & poisonings |
| 306       | PRS_PC1 | 0,038  | 0,005 | 1,039 | 7,97E-15 | 53712   | 279143     | Other mental disorder            | mental disorders      |
| 578       | PRS_PC1 | 0,049  | 0,006 | 1,050 | 1,01E-14 | 28228   | 304627     | Gastrointestinal hemorrhage      | digestive             |
|           |         |        |       |       |          |         |            | Peripheral enthesopathies and    |                       |
| 726       | PRS_PC1 | -0,056 | 0,007 | 0,946 | 2,88E-14 | 20544   | 312311     | allied syndromes                 | musculoskeletal       |
|           |         |        |       |       |          |         |            | Other peripheral nerve           |                       |
| 351       | PRS_PC1 | -0,063 | 0,008 | 0,939 | 3,19E-14 | 15956   | 316899     | disorders                        | neurological          |
| 496       | PRS_PC1 | 0,053  | 0,008 | 1,054 | 6,96E-12 | 18981   | 313874     | Chronic airway obstruction       | respiratory           |
| 716.2     | PRS_PC1 | -0,043 | 0,007 | 0,958 | 1,61E-10 | 25485   | 307370     | Unspecified monoarthritis        | musculoskeletal       |
| 454       | PRS_PC1 | 0,053  | 0,009 | 1,055 | 7,88E-10 | 14552   | 318303     | Varicose veins                   | circulatory system    |
| 726.1     | PRS_PC1 | -0,052 | 0,009 | 0,950 | 2,71E-09 | 14406   | 318449     | Enthesopathy                     | musculoskeletal       |
|           |         |        |       |       |          |         |            | Varicose veins of lower          |                       |
| 454.1     | PRS_PC1 | 0,052  | 0,009 | 1,054 | 2,88E-09 | 13893   | 318962     | extremity                        | circulatory system    |
| 563       | PRS_PC1 | 0,043  | 0,008 | 1,044 | 9,07E-09 | 19447   | 313408     | Constipation                     | digestive             |
| 516.1     | PRS_PC1 | 0,107  | 0,019 | 1,112 | 2,11E-08 | 2888    | 329967     | Hemoptysis                       | respiratory           |
| 516       | PRS_PC1 | 0,101  | 0,019 | 1,106 | 6,22E-08 | 3026    | 329829     | Abnormal sputum                  | respiratory           |
| 278.1     | PRS_PC1 | -0,037 | 0,007 | 0,964 | 8,14E-08 | 23914   | 308941     | Obesity                          | endocrine/metabolic   |
|           |         |        |       |       |          |         |            | Overweight, obesity and other    |                       |
| 278       | PRS_PC1 | -0,037 | 0,007 | 0,964 | 8,65E-08 | 24091   | 308764     | hyperalimantation                | endocrine/metabolic   |
| 317       | PRS_PC1 | 0,039  | 0,008 | 1,040 | 1,90E-07 | 19527   | 313328     | Alcohol-related disorders        | mental disorders      |



|        |         |        |       |       |          |       |        |                                                                 |                       |
|--------|---------|--------|-------|-------|----------|-------|--------|-----------------------------------------------------------------|-----------------------|
| 578.8  | PRS_PC1 | 0,044  | 0,009 | 1,045 | 2,74E-07 | 14947 | 317908 | Hemorrhage of rectum and anus                                   | digestive             |
| 495    | PRS_PC1 | 0,030  | 0,006 | 1,030 | 3,36E-07 | 34663 | 298192 | Asthma                                                          | respiratory           |
| 599    | PRS_PC1 | 0,034  | 0,007 | 1,034 | 3,42E-07 | 25638 | 307217 | Other symptoms/disorders or the urinary system                  | genitourinary         |
| 496.2  | PRS_PC1 | 0,068  | 0,013 | 1,070 | 5,08E-07 | 5878  | 326977 | Chronic bronchitis                                              | respiratory           |
| 1004   | PRS_PC1 | 0,158  | 0,032 | 1,171 | 5,14E-07 | 1045  | 331810 | Other signs and symptoms involving emotional state              | symptoms              |
| 496.21 | PRS_PC1 | 0,068  | 0,014 | 1,070 | 1,13E-06 | 5477  | 327378 | Obstructive chronic bronchitis                                  | respiratory           |
| 716.9  | PRS_PC1 | -0,022 | 0,005 | 0,978 | 1,51E-06 | 62166 | 270689 | Arthropathy NOS                                                 | musculoskeletal       |
| 716    | PRS_PC1 | -0,022 | 0,005 | 0,978 | 1,55E-06 | 62357 | 270498 | Other arthropathies                                             | musculoskeletal       |
| 578.9  | PRS_PC1 | 0,049  | 0,010 | 1,050 | 1,84E-06 | 10053 | 322802 | Hemorrhage of gastrointestinal tract                            | digestive             |
| 564    | PRS_PC1 | 0,027  | 0,006 | 1,027 | 1,93E-06 | 37115 | 295740 | Functional digestive disorders                                  | digestive             |
| 250    | PRS_PC1 | -0,029 | 0,006 | 0,971 | 4,99E-06 | 28811 | 304044 | Diabetes mellitus                                               | endocrine/metabolic   |
| 301    | PRS_PC1 | 0,235  | 0,052 | 1,265 | 6,36E-06 | 382   | 332473 | Personality disorders                                           | mental disorders      |
| 835    | PRS_PC1 | -0,035 | 0,008 | 0,966 | 8,06E-06 | 17965 | 314890 | Internal derangement of knee                                    | injuries & poisonings |
| 785    | PRS_PC1 | 0,022  | 0,005 | 1,022 | 8,81E-06 | 52026 | 280829 | Abdominal pain                                                  | symptoms              |
| 250.2  | PRS_PC1 | -0,028 | 0,006 | 0,972 | 1,09E-05 | 28009 | 304846 | Type 2 diabetes                                                 | endocrine/metabolic   |
| 798    | PRS_PC1 | 0,056  | 0,013 | 1,057 | 1,93E-05 | 6261  | 326594 | Malaise and fatigue                                             | symptoms              |
| 1019   | PRS_PC1 | 0,033  | 0,008 | 1,033 | 2,18E-05 | 18554 | 314301 | Other ill-defined and unknown causes of morbidity and mortality | symptoms              |
| 296.2  | PRS_PC1 | 0,204  | 0,048 | 1,226 | 2,50E-05 | 443   | 332412 | Depression                                                      | mental disorders      |
| 296.22 | PRS_PC1 | 0,204  | 0,048 | 1,226 | 2,50E-05 | 443   | 332412 | Major depressive disorder                                       | mental disorders      |
| 966    | PRS_PC1 | 0,176  | 0,042 | 1,192 | 3,39E-05 | 577   | 332278 | Poisoning by anticonvulsants and anti-Parkinsonism drugs        | injuries & poisonings |
| 870    | PRS_PC1 | 0,054  | 0,013 | 1,056 | 4,72E-05 | 5887  | 326968 | Open wounds of head; neck; and trunk                            | injuries & poisonings |
| 558    | PRS_PC1 | 0,032  | 0,008 | 1,032 | 4,84E-05 | 18164 | 314691 | Noninfectious gastroenteritis                                   | digestive             |

|        |         |        |       |       |          |       |        |                                                           |                       |
|--------|---------|--------|-------|-------|----------|-------|--------|-----------------------------------------------------------|-----------------------|
| 496.1  | PRS_PC1 | 0,069  | 0,018 | 1,072 | 7,69E-05 | 3404  | 329451 | Emphysema                                                 | respiratory           |
| 564.1  | PRS_PC1 | 0,042  | 0,011 | 1,043 | 7,83E-05 | 9287  | 323568 | Irritable Bowel Syndrome                                  | digestive             |
| 965    | PRS_PC1 | 0,039  | 0,010 | 1,040 | 1,13E-04 | 10286 | 322569 | Poisoning by analgesics, antipyretics, and antirheumatics | injuries & poisonings |
| 599.5  | PRS_PC1 | 0,056  | 0,015 | 1,058 | 1,21E-04 | 4935  | 327920 | Frequency of urination and polyuria                       | genitourinary         |
| 574.1  | PRS_PC1 | -0,029 | 0,008 | 0,971 | 1,48E-04 | 18882 | 313973 | Cholelithiasis                                            | digestive             |
| 561    | PRS_PC1 | 0,026  | 0,007 | 1,026 | 1,56E-04 | 24650 | 308205 | Symptoms involving digestive system                       | digestive             |
| 619    | PRS_PC1 | 0,038  | 0,010 | 1,039 | 1,69E-04 | 10897 | 321958 | Noninflammatory female genital disorders                  | genitourinary         |
| 727.1  | PRS_PC1 | -0,046 | 0,012 | 0,955 | 1,83E-04 | 7140  | 325715 | Synovitis and tenosynovitis                               | musculoskeletal       |
| 735.2  | PRS_PC1 | -0,047 | 0,013 | 0,954 | 1,92E-04 | 6750  | 326105 | Acquired toe deformities                                  | musculoskeletal       |
| 574    | PRS_PC1 | -0,026 | 0,007 | 0,974 | 2,06E-04 | 22101 | 310754 | Cholelithiasis and cholecystitis                          | digestive             |
| 574.12 | PRS_PC1 | -0,044 | 0,012 | 0,957 | 2,09E-04 | 7617  | 325238 | Cholelithiasis with other cholecystitis                   | digestive             |
| 290.2  | PRS_PC1 | 0,066  | 0,018 | 1,068 | 2,17E-04 | 3333  | 329522 | Delirium due to conditions classified elsewhere           | mental disorders      |
| 578.2  | PRS_PC1 | 0,062  | 0,017 | 1,064 | 2,26E-04 | 3744  | 329111 | Blood in stool                                            | digestive             |
| 300.9  | PRS_PC1 | 0,214  | 0,059 | 1,238 | 2,74E-04 | 300   | 332555 | Posttraumatic stress disorder                             | mental disorders      |
| 740.11 | PRS_PC1 | -0,037 | 0,010 | 0,964 | 2,92E-04 | 10573 | 322282 | Osteoarthritis, localized, primary                        | musculoskeletal       |
| 292    | PRS_PC1 | 0,038  | 0,011 | 1,039 | 2,92E-04 | 9640  | 323215 | Neurological disorders                                    | mental disorders      |
| 599.4  | PRS_PC1 | 0,034  | 0,010 | 1,035 | 3,04E-04 | 11937 | 320918 | Urinary incontinence                                      | genitourinary         |
| 250.14 | PRS_PC1 | -0,238 | 0,066 | 0,788 | 3,11E-04 | 237   | 332618 | Type 1 diabetes with neurological manifestations          | endocrine/metabolic   |
| 727    | PRS_PC1 | -0,032 | 0,009 | 0,969 | 4,11E-04 | 13578 | 319277 | Other disorders of synovium, tendon, and bursa            | musculoskeletal       |

|        |         |        |       |       |          |       |                                                                     |                       |
|--------|---------|--------|-------|-------|----------|-------|---------------------------------------------------------------------|-----------------------|
| 578.1  | PRS_PC1 | 0,068  | 0,019 | 1,071 | 4,35E-04 | 2780  | 330075 Hematemesis                                                  | digestive             |
|        |         |        |       |       |          |       | Personal history of diseases of                                     |                       |
| 564.9  | PRS_PC1 | 0,023  | 0,007 | 1,023 | 4,40E-04 | 26653 | 306202 digestive system                                             | digestive             |
| 317.11 | PRS_PC1 | 0,102  | 0,029 | 1,108 | 4,63E-04 | 1215  | 331640 Alcoholic liver damage                                       | mental disorders      |
|        |         |        |       |       |          |       | Pain and other symptoms associated with female                      |                       |
| 625    | PRS_PC1 | 0,063  | 0,018 | 1,065 | 4,78E-04 | 3233  | 329622 genital organs                                               | genitourinary         |
| 427.9  | PRS_PC1 | 0,048  | 0,014 | 1,049 | 4,91E-04 | 5667  | 327188 Palpitations                                                 | circulatory system    |
| 735.23 | PRS_PC1 | -0,079 | 0,023 | 0,924 | 5,22E-04 | 2011  | 330844 Hallux rigidus                                               | musculoskeletal       |
|        |         |        |       |       |          |       | Other open wound of head and face                                   |                       |
| 870.3  | PRS_PC1 | 0,052  | 0,015 | 1,053 | 5,50E-04 | 4703  | 328152 Delirium dementia and amnestic and other cognitive disorders | injuries & poisonings |
| 290    | PRS_PC1 | 0,042  | 0,012 | 1,043 | 5,64E-04 | 7196  | 325659 Chronic fatigue syndrome                                     | mental disorders      |
| 798.1  | PRS_PC1 | 0,114  | 0,033 | 1,121 | 5,72E-04 | 942   | 331913 Cancer within the respiratory system                         | symptoms              |
| 165    | PRS_PC1 | 0,050  | 0,015 | 1,052 | 6,17E-04 | 4896  | 327959 Hypercholesterolemia                                         | neoplasms             |
| 272.11 | PRS_PC1 | -0,017 | 0,005 | 0,983 | 7,91E-04 | 50180 | 282675 Psychogenic and somatoform disorders                         | endocrine/metabolic   |
| 303    | PRS_PC1 | 0,134  | 0,040 | 1,143 | 7,99E-04 | 648   | 332207 Hematuria                                                    | mental disorders      |
| 593    | PRS_PC1 | 0,025  | 0,008 | 1,025 | 9,20E-04 | 19530 | 313325 Hyperlipidemia                                               | genitourinary         |
| 272.1  | PRS_PC1 | -0,016 | 0,005 | 0,984 | 9,41E-04 | 54057 | 278798 Osteoarthritis; localized                                    | endocrine/metabolic   |
| 740.1  | PRS_PC1 | -0,022 | 0,007 | 0,978 | 9,49E-04 | 25761 | 307094 Femoral hernia                                               | musculoskeletal       |
| 550.3  | PRS_PC1 | 0,108  | 0,033 | 1,114 | 1,05E-03 | 960   | 331895 Osteoporosis NOS                                             | digestive             |
| 743.11 | PRS_PC1 | 0,032  | 0,010 | 1,032 | 1,09E-03 | 11881 | 320974 Disorders of lipid metabolism                                | musculoskeletal       |
| 272    | PRS_PC1 | -0,016 | 0,005 | 0,984 | 1,11E-03 | 54259 | 278596 Dysphagia                                                    | endocrine/metabolic   |
| 532    | PRS_PC1 | 0,032  | 0,010 | 1,033 | 1,12E-03 | 11017 | 321838 Osteoporosis                                                 | digestive             |
| 743.1  | PRS_PC1 | 0,032  | 0,010 | 1,032 | 1,13E-03 | 11888 | 320967 Coronary atherosclerosis                                     | musculoskeletal       |
| 411.4  | PRS_PC1 | -0,021 | 0,007 | 0,979 | 1,24E-03 | 28031 | 304824                                                              | circulatory system    |

|        |         |        |       |       |          |       |        |                                                               |                       |
|--------|---------|--------|-------|-------|----------|-------|--------|---------------------------------------------------------------|-----------------------|
| 915    | PRS_PC1 | 0,038  | 0,012 | 1,039 | 1,24E-03 | 7750  | 325105 | Superficial injury without mention of infection               | injuries & poisonings |
| 386.9  | PRS_PC1 | 0,037  | 0,012 | 1,038 | 1,26E-03 | 7979  | 324876 | Dizziness and giddiness (Light-headedness and vertigo)        | sense organs          |
| 592.13 | PRS_PC1 | 0,178  | 0,055 | 1,195 | 1,30E-03 | 339   | 332516 | Chronic interstitial cystitis                                 | genitourinary         |
| 250.1  | PRS_PC1 | -0,056 | 0,017 | 0,946 | 1,31E-03 | 3508  | 329347 | Type 1 diabetes                                               | endocrine/metabolic   |
| 514    | PRS_PC1 | 0,049  | 0,015 | 1,050 | 1,35E-03 | 4476  | 328379 | Abnormal findings examination of lungs                        | respiratory           |
| 165.1  | PRS_PC1 | 0,050  | 0,016 | 1,051 | 1,48E-03 | 4249  | 328606 | Cancer of bronchus; lung                                      | neoplasms             |
| 599.9  | PRS_PC1 | 0,067  | 0,022 | 1,070 | 1,71E-03 | 2257  | 330598 | Other abnormality of urination                                | genitourinary         |
| 709.7  | PRS_PC1 | -0,053 | 0,017 | 0,948 | 1,73E-03 | 3630  | 329225 | Unspecified diffuse connective tissue disease                 | dermatologic          |
| 574.2  | PRS_PC1 | -0,052 | 0,017 | 0,949 | 1,74E-03 | 3756  | 329099 | Calculus of bile duct                                         | digestive             |
| 939    | PRS_PC1 | 0,048  | 0,015 | 1,049 | 1,77E-03 | 4395  | 328460 | Atopic/contact dermatitis due to other or unspecified         | dermatologic          |
| 253    | PRS_PC1 | 0,095  | 0,031 | 1,099 | 2,03E-03 | 1107  | 331748 | Disorders of the pituitary gland and its hypothalamic control | endocrine/metabolic   |
| 500    | PRS_PC1 | 0,109  | 0,036 | 1,116 | 2,12E-03 | 822   | 332033 | Lung disease due to external agents                           | respiratory           |
| 292.4  | PRS_PC1 | 0,045  | 0,015 | 1,046 | 2,22E-03 | 4818  | 328037 | Altered mental status                                         | mental disorders      |
| 740    | PRS_PC1 | -0,016 | 0,005 | 0,984 | 2,28E-03 | 44801 | 288054 | Osteoarthrosis                                                | musculoskeletal       |
| 819    | PRS_PC1 | 0,048  | 0,016 | 1,049 | 2,57E-03 | 4221  | 328634 | Skull and face fracture and other intercranial injury         | injuries & poisonings |
| 396    | PRS_PC1 | 0,067  | 0,022 | 1,069 | 2,67E-03 | 2116  | 330739 | Abnormal heart sounds                                         | circulatory system    |
| 473    | PRS_PC1 | 0,052  | 0,017 | 1,053 | 2,80E-03 | 3488  | 329367 | Diseases of the larynx and vocal cords                        | respiratory           |
| 574.11 | PRS_PC1 | -0,062 | 0,021 | 0,940 | 2,84E-03 | 2419  | 330436 | Cholelithiasis with acute cholecystitis                       | digestive             |

|        |         |        |       |       |          |        |        |                                                             |                       |
|--------|---------|--------|-------|-------|----------|--------|--------|-------------------------------------------------------------|-----------------------|
| 455    | PRS_PC1 | 0,020  | 0,007 | 1,020 | 2,95E-03 | 25910  | 306945 | Hemorrhoids                                                 | circulatory system    |
| 522    | PRS_PC1 | 0,063  | 0,021 | 1,065 | 3,00E-03 | 2283   | 330572 | Diseases of pulp and periapical tissues                     | digestive             |
| 429    | PRS_PC1 | 0,085  | 0,029 | 1,089 | 3,04E-03 | 1266   | 331589 | Ill-defined descriptions and complications of heart disease | circulatory system    |
| 149.4  | PRS_PC1 | 0,156  | 0,053 | 1,169 | 3,21E-03 | 368    | 332487 | Cancer of larynx                                            | neoplasms             |
| 300.12 | PRS_PC1 | 0,078  | 0,027 | 1,082 | 3,50E-03 | 1440   | 331415 | Agoraphobia, social phobia, and panic disorder              | mental disorders      |
| 528.3  | PRS_PC1 | -0,184 | 0,063 | 0,832 | 3,58E-03 | 259    | 332596 | Cellulitis and abscess of oral soft tissues                 | digestive             |
| 345.12 | PRS_PC1 | 0,149  | 0,051 | 1,160 | 3,62E-03 | 397    | 332458 | Partial epilepsy                                            | neurological          |
| 356    | PRS_PC1 | 0,185  | 0,063 | 1,203 | 3,62E-03 | 257    | 332598 | Hereditary and idiopathic peripheral neuropathy             | neurological          |
| 253.7  | PRS_PC1 | 0,152  | 0,053 | 1,164 | 4,28E-03 | 368    | 332487 | Other disorders of neurohypophysis                          | endocrine/metabolic   |
| 681.2  | PRS_PC1 | -0,105 | 0,037 | 0,901 | 4,32E-03 | 772    | 332083 | Cellulitis and abscess of face/neck                         | dermatologic          |
| 345.3  | PRS_PC1 | 0,050  | 0,018 | 1,051 | 4,33E-03 | 3387   | 329468 | Convulsions                                                 | neurological          |
| 345    | PRS_PC1 | 0,035  | 0,012 | 1,035 | 4,47E-03 | 7062   | 325793 | Epilepsy, recurrent seizures, convulsions                   | neurological          |
| 433    | PRS_PC1 | 0,024  | 0,009 | 1,025 | 4,49E-03 | 15132  | 317723 | Cerebrovascular disease                                     | circulatory system    |
| 715    | PRS_PC1 | 0,054  | 0,019 | 1,055 | 4,58E-03 | 2927   | 329928 | Other inflammatory spondylopathies                          | musculoskeletal       |
| 522.5  | PRS_PC1 | 0,073  | 0,026 | 1,076 | 4,59E-03 | 1562   | 331293 | Periapical abscess                                          | digestive             |
| 1009   | PRS_PC1 | 0,029  | 0,010 | 1,029 | 4,60E-03 | 10223  | 322632 | Injury, NOS                                                 | injuries & poisonings |
| 366.2  | PRS_PC1 | -0,021 | 0,008 | 0,979 | 4,81E-03 | 20115  | 312740 | Senile cataract                                             | sense organs          |
| 401.1  | PRS_PC1 | -0,011 | 0,004 | 0,989 | 4,81E-03 | 108872 | 223983 | Essential hypertension                                      | circulatory system    |
| 401    | PRS_PC1 | -0,011 | 0,004 | 0,989 | 4,83E-03 | 109037 | 223818 | Hypertension                                                | circulatory system    |

|        |         |        |       |       |          |       |        |                                                          |                       |
|--------|---------|--------|-------|-------|----------|-------|--------|----------------------------------------------------------|-----------------------|
| 429.2  | PRS_PC1 | 0,095  | 0,034 | 1,099 | 5,05E-03 | 911   | 331944 | Abnormal function study of cardiovascular system         | circulatory system    |
| 476    | PRS_PC1 | 0,054  | 0,019 | 1,056 | 5,36E-03 | 2768  | 330087 | Allergic rhinitis                                        | respiratory           |
| 443.7  | PRS_PC1 | -0,110 | 0,040 | 0,896 | 5,49E-03 | 662   | 332193 | Peripheral angiopathy in diseases classified elsewhere   | circulatory system    |
| 433.3  | PRS_PC1 | 0,038  | 0,014 | 1,038 | 6,01E-03 | 5649  | 327206 | Cerebral ischemia                                        | circulatory system    |
| 317.1  | PRS_PC1 | 0,024  | 0,009 | 1,024 | 6,02E-03 | 14250 | 318605 | Alcoholism                                               | mental disorders      |
| 303.3  | PRS_PC1 | 0,129  | 0,048 | 1,138 | 6,59E-03 | 457   | 332398 | Psychogenic disorder                                     | mental disorders      |
| 480.1  | PRS_PC1 | 0,024  | 0,009 | 1,025 | 6,83E-03 | 13640 | 319215 | Bacterial pneumonia                                      | respiratory           |
| 280.2  | PRS_PC1 | 0,106  | 0,039 | 1,112 | 6,87E-03 | 670   | 332185 | Iron deficiency anemia secondary to blood loss (chronic) | hematopoietic         |
| 729.1  | PRS_PC1 | 0,086  | 0,032 | 1,090 | 6,91E-03 | 1028  | 331827 | Rheumatism, unspecified and fibrositis                   | musculoskeletal       |
| 339    | PRS_PC1 | 0,027  | 0,010 | 1,027 | 6,94E-03 | 10725 | 322130 | Other headache syndromes                                 | neurological          |
| 858    | PRS_PC1 | -0,038 | 0,014 | 0,963 | 6,98E-03 | 5451  | 327404 | Complication of internal orthopedic device               | injuries & poisonings |
| 276    | PRS_PC1 | 0,022  | 0,008 | 1,022 | 7,26E-03 | 16434 | 316421 | Disorders of fluid, electrolyte, and acid-base balance   | endocrine/metabolic   |
| 696.4  | PRS_PC1 | 0,044  | 0,017 | 1,045 | 7,80E-03 | 3833  | 329022 | Psoriasis                                                | dermatologic          |
| 433.21 | PRS_PC1 | 0,047  | 0,018 | 1,049 | 7,97E-03 | 3296  | 329559 | Cerebral artery occlusion, with cerebral infarction      | circulatory system    |
| 743    | PRS_PC1 | 0,024  | 0,009 | 1,024 | 8,25E-03 | 13766 | 319089 | Osteoporosis, osteopenia and pathological fracture       | musculoskeletal       |
| 501    | PRS_PC1 | 0,064  | 0,024 | 1,066 | 8,29E-03 | 1770  | 331085 | Pneumonitis due to inhalation of food or vomitus         | respiratory           |
| 709    | PRS_PC1 | -0,039 | 0,015 | 0,962 | 8,33E-03 | 4775  | 328080 | Diffuse diseases of connective tissue                    | dermatologic          |
| 619.3  | PRS_PC1 | 0,047  | 0,018 | 1,049 | 8,45E-03 | 3264  | 329591 | Noninflammatory disorders of cervix                      | genitourinary         |

|        |         |        |       |       |          |       |        |                                                                                       |                         |
|--------|---------|--------|-------|-------|----------|-------|--------|---------------------------------------------------------------------------------------|-------------------------|
| 315    | PRS_PC1 | 0,093  | 0,035 | 1,098 | 8,53E-03 | 825   | 332030 | Develomental delays and disorders                                                     | mental disorders        |
| 696.41 | PRS_PC1 | 0,049  | 0,019 | 1,050 | 8,55E-03 | 3044  | 329811 | Psoriasis vulgaris                                                                    | dermatologic            |
| 696    | PRS_PC1 | 0,043  | 0,016 | 1,044 | 9,05E-03 | 3926  | 328929 | Psoriasis and related disorders                                                       | dermatologic            |
| 10     | PRS_PC1 | 0,180  | 0,069 | 1,197 | 9,10E-03 | 218   | 332637 | Tuberculosis                                                                          | infectious diseases     |
| 726.2  | PRS_PC1 | -0,122 | 0,047 | 0,885 | 9,21E-03 | 471   | 332384 | Synoviopathy                                                                          | musculoskeletal         |
| 704    | PRS_PC1 | 0,033  | 0,013 | 1,034 | 9,30E-03 | 6360  | 326495 | Diseases of hair and hair follicles                                                   | dermatologic            |
| 781    | PRS_PC1 | 0,046  | 0,018 | 1,047 | 9,62E-03 | 3321  | 329534 | Symptoms involving nervous and musculoskeletal systems                                | symptoms                |
| 112    | PRS_PC1 | 0,040  | 0,015 | 1,041 | 9,76E-03 | 4418  | 328437 | Candidiasis                                                                           | infectious diseases     |
| 479    | PRS_PC1 | 0,036  | 0,014 | 1,037 | 0,0100   | 5261  | 327594 | Other upper respiratory disease                                                       | respiratory             |
| 289.4  | PRS_PC1 | 0,041  | 0,016 | 1,042 | 0,0101   | 4149  | 328706 | Lymphadenitis                                                                         | hematopoietic           |
| 965.3  | PRS_PC1 | 0,119  | 0,046 | 1,126 | 0,0105   | 479   | 332376 | Salicylates causing adverse effects in therapeutic use                                | injuries & poisonings   |
| 645    | PRS_PC1 | 0,075  | 0,029 | 1,078 | 0,0106   | 1257  | 331598 | Late pregnancy and failed induction                                                   | pregnancy complications |
| 560.4  | PRS_PC1 | 0,036  | 0,014 | 1,036 | 0,0107   | 5404  | 327451 | Other intestinal obstruction                                                          | digestive               |
| 418    | PRS_PC1 | 0,014  | 0,006 | 1,014 | 0,0110   | 36558 | 296297 | Nonspecific chest pain                                                                | circulatory system      |
| 737.3  | PRS_PC1 | 0,055  | 0,022 | 1,057 | 0,0115   | 2213  | 330642 | Kyphoscoliosis and scoliosis                                                          | musculoskeletal         |
| 687.4  | PRS_PC1 | 0,040  | 0,016 | 1,041 | 0,0120   | 4110  | 328745 | Disturbance of skin sensation                                                         | dermatologic            |
| 401.22 | PRS_PC1 | -0,063 | 0,025 | 0,939 | 0,0129   | 1622  | 331233 | Hypertensive chronic kidney disease                                                   | circulatory system      |
| 737    | PRS_PC1 | 0,049  | 0,020 | 1,050 | 0,0131   | 2718  | 330137 | Curvature of spine                                                                    | musculoskeletal         |
| 346.1  | PRS_PC1 | 0,159  | 0,064 | 1,172 | 0,0131   | 252   | 332603 | Nonspecific abnormal findings on radiological and other examination of skull and head | neurological            |

|        |         |        |       |       |        |       |        |                                                                                     |                      |
|--------|---------|--------|-------|-------|--------|-------|--------|-------------------------------------------------------------------------------------|----------------------|
| 596    | PRS_PC1 | 0,022  | 0,009 | 1,023 | 0,0134 | 13469 | 319386 | Other disorders of bladder                                                          | genitourinary        |
| 427    | PRS_PC1 | 0,014  | 0,006 | 1,014 | 0,0135 | 35290 | 297565 | Cardiac dysrhythmias                                                                | circulatory system   |
| 333.4  | PRS_PC1 | 0,124  | 0,051 | 1,133 | 0,0138 | 406   | 332449 | Torsion dystonia                                                                    | neurological         |
|        |         |        |       |       |        |       |        | Rheumatoid arthritis and other inflammatory polyarthropathies                       |                      |
| 714    | PRS_PC1 | 0,029  | 0,012 | 1,029 | 0,0140 | 7723  | 325132 | polyarthropathies                                                                   | musculoskeletal      |
| 742.8  | PRS_PC1 | -0,068 | 0,028 | 0,934 | 0,0141 | 1344  | 331511 | Articular cartilage disorder                                                        | musculoskeletal      |
| 789    | PRS_PC1 | 0,019  | 0,008 | 1,019 | 0,0143 | 17953 | 314902 | Nausea and vomiting                                                                 | symptoms             |
|        |         |        |       |       |        |       |        | Cerebral edema and compression of brain                                             |                      |
| 348.2  | PRS_PC1 | 0,109  | 0,045 | 1,116 | 0,0143 | 519   | 332336 | Swelling, mass, or lump in head and neck [Space-occupying lesion, intracranial NOS] | neurological         |
| 293.1  | PRS_PC1 | 0,070  | 0,029 | 1,073 | 0,0143 | 1261  | 331594 | NOS]                                                                                | mental disorders     |
| 601.11 | PRS_PC1 | 0,131  | 0,053 | 1,140 | 0,0144 | 362   | 332493 | Acute prostatitis                                                                   | genitourinary        |
| 300.11 | PRS_PC1 | 0,154  | 0,063 | 1,166 | 0,0146 | 261   | 332594 | Generalized anxiety disorder                                                        | mental disorders     |
| 619.2  | PRS_PC1 | 0,039  | 0,016 | 1,040 | 0,0162 | 4010  | 328845 | Disorders of uterus, NEC                                                            | genitourinary        |
|        |         |        |       |       |        |       |        | Perforation of tympanic membrane                                                    |                      |
| 384.4  | PRS_PC1 | 0,070  | 0,029 | 1,073 | 0,0165 | 1206  | 331649 | membrane                                                                            | sense organs         |
| 292.1  | PRS_PC1 | 0,045  | 0,019 | 1,046 | 0,0167 | 2907  | 329948 | Aphasia/speech disturbance                                                          | mental disorders     |
| 625.1  | PRS_PC1 | 0,069  | 0,029 | 1,071 | 0,0169 | 1267  | 331588 | Dyspareunia                                                                         | genitourinary        |
|        |         |        |       |       |        |       |        | Other local infections of skin and subcutaneous tissue                              |                      |
| 686    | PRS_PC1 | -0,051 | 0,021 | 0,951 | 0,0170 | 2326  | 330529 | and subcutaneous tissue                                                             | dermatologic         |
| 411    | PRS_PC1 | -0,013 | 0,005 | 0,987 | 0,0173 | 43007 | 289848 | Ischemic Heart Disease                                                              | circulatory system   |
|        |         |        |       |       |        |       |        | Lower gastrointestinal congenital anomalies                                         |                      |
| 750.2  | PRS_PC1 | 0,103  | 0,043 | 1,108 | 0,0175 | 552   | 332303 | congenital anomalies                                                                | congenital anomalies |
|        |         |        |       |       |        |       |        | Hyposmolality and/or hyponatremia                                                   |                      |
| 276.12 | PRS_PC1 | 0,034  | 0,014 | 1,035 | 0,0175 | 5160  | 327695 | hyponatremia                                                                        | endocrine/metabolic  |
| 594.3  | PRS_PC1 | -0,044 | 0,019 | 0,957 | 0,0178 | 3027  | 329828 | Calculus of ureter                                                                  | genitourinary        |



|       |         |        |       |       |        |       |                                                               |                     |
|-------|---------|--------|-------|-------|--------|-------|---------------------------------------------------------------|---------------------|
|       |         |        |       |       |        |       | Other diseases of respiratory system, not elsewhere           |                     |
| 519   | PRS_PC1 | 0,019  | 0,008 | 1,019 | 0,0189 | 16250 | 316605 classified                                             | respiratory         |
| 624.9 | PRS_PC1 | 0,029  | 0,012 | 1,030 | 0,0189 | 6896  | 325959 stress incontinence, female                            | genitourinary       |
|       |         |        |       |       |        |       | Nonspecific abnormal findings                                 |                     |
| 579.8 | PRS_PC1 | 0,041  | 0,017 | 1,042 | 0,0189 | 3430  | 329425 in stool contents                                      | digestive           |
| 573.3 | PRS_PC1 | 0,109  | 0,046 | 1,115 | 0,0191 | 481   | 332374 Hepatomegaly                                           | digestive           |
| 208   | PRS_PC1 | 0,014  | 0,006 | 1,014 | 0,0191 | 33122 | 299733 Benign neoplasm of colon                               | neoplasms           |
| 251.1 | PRS_PC1 | -0,053 | 0,023 | 0,948 | 0,0198 | 2022  | 330833 Hypoglycemia                                           | endocrine/metabolic |
| 446.5 | PRS_PC1 | 0,087  | 0,037 | 1,091 | 0,0200 | 748   | 332107 Giant cell arteritis                                   | circulatory system  |
| 714.1 | PRS_PC1 | 0,029  | 0,012 | 1,029 | 0,0213 | 6875  | 325980 Rheumatoid arthritis                                   | musculoskeletal     |
|       |         |        |       |       |        |       | Other diseases of respiratory system, NEC                     |                     |
| 519.8 | PRS_PC1 | 0,019  | 0,008 | 1,019 | 0,0220 | 15472 | 317383                                                        | respiratory         |
|       |         |        |       |       |        |       | Disorder of skin and subcutaneous tissue NOS                  |                     |
| 689   | PRS_PC1 | 0,024  | 0,011 | 1,025 | 0,0222 | 9309  | 323546                                                        | dermatologic        |
|       |         |        |       |       |        |       | Postmenopausal atrophic vaginitis                             |                     |
| 627.3 | PRS_PC1 | 0,059  | 0,026 | 1,061 | 0,0223 | 1559  | 331296                                                        | genitourinary       |
|       |         |        |       |       |        |       | Other disorders of tympanic membrane                          |                     |
| 384   | PRS_PC1 | 0,059  | 0,026 | 1,060 | 0,0225 | 1575  | 331280                                                        | sense organs        |
| 276.1 | PRS_PC1 | 0,023  | 0,010 | 1,023 | 0,0225 | 11063 | 321792 Electrolyte imbalance                                  | endocrine/metabolic |
| 380   | PRS_PC1 | -0,078 | 0,034 | 0,925 | 0,0235 | 882   | 331973 Disorders of external ear                              | sense organs        |
| 711.1 | PRS_PC1 | -0,099 | 0,044 | 0,906 | 0,0240 | 539   | 332316 Pyogenic arthritis                                     | musculoskeletal     |
| 528.1 | PRS_PC1 | 0,084  | 0,037 | 1,088 | 0,0242 | 748   | 332107 Stomatitis and mucositis                               | digestive           |
| 585.3 | PRS_PC1 | -0,029 | 0,013 | 0,972 | 0,0244 | 6676  | 326179 Chronic renal failure [CKD]                            | genitourinary       |
| 180.1 | PRS_PC1 | 0,126  | 0,056 | 1,134 | 0,0253 | 328   | 332527 Cervical cancer                                        | neoplasms           |
| 717   | PRS_PC1 | 0,044  | 0,020 | 1,045 | 0,0253 | 2721  | 330134 Polymyalgia Rheumatica                                 | musculoskeletal     |
|       |         |        |       |       |        |       | Iron deficiency anemias, unspecified or not due to blood loss |                     |
| 280.1 | PRS_PC1 | -0,020 | 0,009 | 0,981 | 0,0259 | 14092 | 318763                                                        | hematopoietic       |

|        |         |        |       |       |        |       |        |                                 |                       |
|--------|---------|--------|-------|-------|--------|-------|--------|---------------------------------|-----------------------|
|        |         |        |       |       |        |       |        | Other chronic ischemic heart    |                       |
| 411.8  | PRS_PC1 | -0,016 | 0,007 | 0,984 | 0,0265 | 22472 | 310383 | disease, unspecified            | circulatory system    |
| 250.41 | PRS_PC1 | 0,072  | 0,033 | 1,075 | 0,0270 | 968   | 331887 | Impaired fasting glucose        | endocrine/metabolic   |
| 480    | PRS_PC1 | 0,016  | 0,007 | 1,017 | 0,0275 | 20219 | 312636 | Pneumonia                       | respiratory           |
|        |         |        |       |       |        |       |        | Acute upper respiratory         |                       |
|        |         |        |       |       |        |       |        | infections of multiple or       |                       |
| 465    | PRS_PC1 | 0,039  | 0,018 | 1,040 | 0,0277 | 3324  | 329531 | unspecified sites               | respiratory           |
|        |         |        |       |       |        |       |        | Symptoms concerning             |                       |
|        |         |        |       |       |        |       |        | nutrition, metabolism, and      |                       |
| 1002   | PRS_PC1 | 0,023  | 0,010 | 1,023 | 0,0289 | 10021 | 322834 | development                     | symptoms              |
| 433.2  | PRS_PC1 | 0,027  | 0,012 | 1,027 | 0,0292 | 7044  | 325811 | Occlusion of cerebral arteries  | circulatory system    |
|        |         |        |       |       |        |       |        | Arthropathy associated with     |                       |
|        |         |        |       |       |        |       |        | other disorders classified      |                       |
| 713    | PRS_PC1 | -0,140 | 0,064 | 0,870 | 0,0293 | 252   | 332603 | elsewhere                       | musculoskeletal       |
| 366    | PRS_PC1 | -0,012 | 0,006 | 0,988 | 0,0295 | 39085 | 293770 | Cataract                        | sense organs          |
| 255    | PRS_PC1 | 0,065  | 0,030 | 1,068 | 0,0306 | 1134  | 331721 | Disorders of adrenal glands     | endocrine/metabolic   |
|        |         |        |       |       |        |       |        | Malignant neoplasm of           |                       |
|        |         |        |       |       |        |       |        | rectum, rectosigmoid junction,  |                       |
| 153.3  | PRS_PC1 | 0,040  | 0,018 | 1,040 | 0,0308 | 3108  | 329747 | and anus                        | neoplasms             |
|        |         |        |       |       |        |       |        | Derangement of joint, non-      |                       |
| 742    | PRS_PC1 | -0,035 | 0,016 | 0,966 | 0,0308 | 4094  | 328761 | traumatic                       | musculoskeletal       |
|        |         |        |       |       |        |       |        | Stricture and stenosis of       |                       |
| 530.3  | PRS_PC1 | -0,040 | 0,018 | 0,961 | 0,0313 | 3073  | 329782 | esophagus                       | digestive             |
| 465.2  | PRS_PC1 | 0,060  | 0,029 | 1,062 | 0,0358 | 1261  | 331594 | Acute pharyngitis               | respiratory           |
| 465.4  | PRS_PC1 | 0,141  | 0,067 | 1,151 | 0,0371 | 227   | 332628 | Acute laryngitis and tracheitis | respiratory           |
| 872    | PRS_PC1 | -0,088 | 0,042 | 0,916 | 0,0372 | 588   | 332267 | Traumatic amputation            | injuries & poisonings |
| 464    | PRS_PC1 | 0,135  | 0,065 | 1,145 | 0,0372 | 245   | 332610 | Acute sinusitis                 | respiratory           |
| 594    | PRS_PC1 | -0,023 | 0,011 | 0,977 | 0,0374 | 8589  | 324266 | Urinary calculus                | genitourinary         |
|        |         |        |       |       |        |       |        | Noninflammatory disorders of    |                       |
| 619.5  | PRS_PC1 | 0,053  | 0,026 | 1,055 | 0,0384 | 1588  | 331267 | vulva and perineum              | genitourinary         |

|        |         |        |       |       |        |       |        |                                                                                              |                      |
|--------|---------|--------|-------|-------|--------|-------|--------|----------------------------------------------------------------------------------------------|----------------------|
| 345.1  | PRS_PC1 | 0,058  | 0,028 | 1,059 | 0,0390 | 1332  | 331523 | Epilepsy                                                                                     | neurological         |
| 614.52 | PRS_PC1 | 0,092  | 0,045 | 1,097 | 0,0397 | 515   | 332340 | Vaginitis and vulvovaginitis                                                                 | genitourinary        |
| 681.7  | PRS_PC1 | 0,066  | 0,032 | 1,068 | 0,0398 | 1021  | 331834 | Cellulitis and abscess of trunk                                                              | dermatologic         |
| 480.11 | PRS_PC1 | 0,019  | 0,009 | 1,019 | 0,0403 | 12361 | 320494 | Pneumococcal pneumonia                                                                       | respiratory          |
| 603    | PRS_PC1 | 0,038  | 0,019 | 1,039 | 0,0421 | 2941  | 329914 | Other disorders of testis                                                                    | genitourinary        |
| 711    | PRS_PC1 | -0,080 | 0,039 | 0,923 | 0,0425 | 673   | 332182 | Arthropathy associated with infections                                                       | musculoskeletal      |
| 159    | PRS_PC1 | 0,023  | 0,011 | 1,023 | 0,0426 | 8641  | 324214 | Malignant neoplasm of other and ill-defined sites within the digestive organs and peritoneum | neoplasms            |
| 525    | PRS_PC1 | 0,035  | 0,017 | 1,035 | 0,0429 | 3582  | 329273 | Other diseases of the teeth and supporting structures                                        | digestive            |
| 327.4  | PRS_PC1 | 0,107  | 0,053 | 1,112 | 0,0431 | 373   | 332482 | Insomnia                                                                                     | neurological         |
| 276.14 | PRS_PC1 | 0,032  | 0,016 | 1,032 | 0,0436 | 4202  | 328653 | Hypopotassemia                                                                               | endocrine/metabolic  |
| 751    | PRS_PC1 | 0,046  | 0,023 | 1,047 | 0,0436 | 2019  | 330836 | Genitourinary congenital anomalies                                                           | congenital anomalies |
| 401.2  | PRS_PC1 | -0,047 | 0,023 | 0,954 | 0,0439 | 1901  | 330954 | Hypertensive heart and/or renal disease                                                      | circulatory system   |
| 575.6  | PRS_PC1 | -0,081 | 0,040 | 0,922 | 0,0439 | 637   | 332218 | Cholesterolosis of gallbladder                                                               | digestive            |
| 300.13 | PRS_PC1 | 0,055  | 0,028 | 1,057 | 0,0440 | 1376  | 331479 | Phobia                                                                                       | mental disorders     |
| 751.2  | PRS_PC1 | 0,060  | 0,030 | 1,062 | 0,0441 | 1161  | 331694 | Congenital anomalies of urinary system                                                       | congenital anomalies |
| 333.1  | PRS_PC1 | -0,079 | 0,039 | 0,924 | 0,0447 | 674   | 332181 | Essential tremor                                                                             | neurological         |
| 304    | PRS_PC1 | 0,111  | 0,055 | 1,117 | 0,0451 | 339   | 332516 | Adjustment reaction                                                                          | mental disorders     |
| 569    | PRS_PC1 | 0,025  | 0,012 | 1,025 | 0,0455 | 6989  | 325866 | Other disorders of intestine                                                                 | digestive            |
| 426.23 | PRS_PC1 | 0,065  | 0,033 | 1,067 | 0,0460 | 980   | 331875 | Second degree AV block                                                                       | circulatory system   |
| 377.3  | PRS_PC1 | -0,119 | 0,060 | 0,888 | 0,0468 | 291   | 332564 | Optic neuritis/neuropathy                                                                    | sense organs         |
| 780    | PRS_PC1 | 0,100  | 0,050 | 1,105 | 0,0470 | 409   | 332446 | Hypothermia/Chills                                                                           | symptoms             |
| 448    | PRS_PC1 | 0,142  | 0,072 | 1,153 | 0,0470 | 202   | 332653 | Disease of capillaries                                                                       | circulatory system   |

|        |         |        |       |       |        |      |        |                                                   |                       |
|--------|---------|--------|-------|-------|--------|------|--------|---------------------------------------------------|-----------------------|
| 199    | PRS_PC1 | -0,043 | 0,022 | 0,958 | 0,0471 | 2214 | 330641 | Neoplasm of uncertain behavior                    | neoplasms             |
| 598    | PRS_PC1 | 0,029  | 0,015 | 1,030 | 0,0488 | 4710 | 328145 | Abnormal findings on examination of urine         | genitourinary         |
| 758    | PRS_PC1 | -0,131 | 0,066 | 0,877 | 0,0491 | 234  | 332621 | Chromosomal anomalies and genetic disorders       | congenital anomalies  |
| 446    | PRS_PC1 | 0,054  | 0,027 | 1,055 | 0,0505 | 1392 | 331463 | Polyarteritis nodosa and allied conditions        | circulatory system    |
| 609    | PRS_PC1 | 0,129  | 0,066 | 1,137 | 0,0507 | 238  | 332617 | Male infertility and abnormal spermatozoa         | genitourinary         |
| 560    | PRS_PC1 | 0,024  | 0,013 | 1,025 | 0,0520 | 6689 | 326166 | Intestinal obstruction without mention of hernia  | digestive             |
| 687.2  | PRS_PC1 | 0,126  | 0,065 | 1,134 | 0,0522 | 247  | 332608 | Localized superficial swelling, mass, or lump     | symptoms              |
| 742.1  | PRS_PC1 | -0,096 | 0,049 | 0,909 | 0,0523 | 426  | 332429 | Loose body in joint                               | musculoskeletal       |
| 601    | PRS_PC1 | 0,036  | 0,019 | 1,037 | 0,0532 | 3021 | 329834 | Inflammatory diseases of prostate                 | genitourinary         |
| 851    | PRS_PC1 | -0,021 | 0,011 | 0,980 | 0,0535 | 9380 | 323475 | Complications of transplants and reattached limbs | injuries & poisonings |
| 180    | PRS_PC1 | 0,040  | 0,021 | 1,041 | 0,0541 | 2422 | 330433 | Cervical cancer and dysplasia                     | neoplasms             |
| 155.1  | PRS_PC1 | 0,112  | 0,058 | 1,119 | 0,0553 | 303  | 332552 | Malignant neoplasm of liver, primary              | neoplasms             |
| 750    | PRS_PC1 | 0,058  | 0,030 | 1,059 | 0,0557 | 1141 | 331714 | Digestive congenital anomalies                    | congenital anomalies  |
| 603.1  | PRS_PC1 | 0,046  | 0,024 | 1,047 | 0,0558 | 1810 | 331045 | Hydrocele                                         | genitourinary         |
| 250.23 | PRS_PC1 | -0,039 | 0,020 | 0,962 | 0,0559 | 2522 | 330333 | Type 2 diabetes with ophthalmic manifestations    | endocrine/metabolic   |
| 427.7  | PRS_PC1 | 0,030  | 0,016 | 1,031 | 0,0562 | 4166 | 328689 | Tachycardia NOS                                   | circulatory system    |
| 743.2  | PRS_PC1 | -0,056 | 0,030 | 0,945 | 0,0574 | 1180 | 331675 | Pathologic fracture                               | musculoskeletal       |

|        |         |        |       |       |        |       |        |                                                         |                         |
|--------|---------|--------|-------|-------|--------|-------|--------|---------------------------------------------------------|-------------------------|
|        |         |        |       |       |        |       |        | Intestinal disaccharidase deficiencies and disaccharide |                         |
| 271.3  | PRS_PC1 | 0,118  | 0,062 | 1,125 | 0,0575 | 270   | 332585 | malabsorption                                           | endocrine/metabolic     |
| 348    | PRS_PC1 | 0,055  | 0,029 | 1,057 | 0,0577 | 1220  | 331635 | Other conditions of brain                               | neurological            |
| 590    | PRS_PC1 | 0,041  | 0,021 | 1,042 | 0,0578 | 2258  | 330597 | Pyelonephritis                                          | genitourinary           |
|        |         |        |       |       |        |       |        | Organic or persistent                                   |                         |
| 327.41 | PRS_PC1 | 0,106  | 0,056 | 1,112 | 0,0580 | 331   | 332524 | insomnia                                                | neurological            |
| 371.3  | PRS_PC1 | 0,035  | 0,018 | 1,035 | 0,0580 | 3132  | 329723 | Inflammation of eyelids                                 | sense organs            |
|        |         |        |       |       |        |       |        | Abnormal involuntary                                    |                         |
| 350.1  | PRS_PC1 | 0,047  | 0,025 | 1,048 | 0,0589 | 1688  | 331167 | movements                                               | neurological            |
| 204.4  | PRS_PC1 | -0,061 | 0,032 | 0,941 | 0,0595 | 993   | 331862 | Multiple myeloma                                        | neoplasms               |
| 350    | PRS_PC1 | 0,022  | 0,012 | 1,022 | 0,0600 | 7644  | 325211 | Abnormal movement                                       | neurological            |
|        |         |        |       |       |        |       |        | Obsessive-compulsive                                    |                         |
| 300.3  | PRS_PC1 | 0,130  | 0,069 | 1,139 | 0,0601 | 215   | 332640 | disorders                                               | mental disorders        |
| 182    | PRS_PC1 | 0,045  | 0,024 | 1,046 | 0,0605 | 1812  | 331043 | Malignant neoplasm of uterus                            | neoplasms               |
| 565    | PRS_PC1 | 0,014  | 0,007 | 1,014 | 0,0608 | 21134 | 311721 | Anal and rectal conditions                              | digestive               |
| 290.16 | PRS_PC1 | 0,064  | 0,034 | 1,066 | 0,0618 | 901   | 331954 | Vascular dementia                                       | mental disorders        |
|        |         |        |       |       |        |       |        | Poisoning by hormones and                               |                         |
| 962    | PRS_PC1 | 0,069  | 0,037 | 1,071 | 0,0625 | 765   | 332090 | synthetic substitutes                                   | injuries & poisonings   |
| 292.2  | PRS_PC1 | 0,079  | 0,043 | 1,083 | 0,0638 | 567   | 332288 | Mild cognitive impairment                               | mental disorders        |
| 732    | PRS_PC1 | -0,075 | 0,040 | 0,928 | 0,0639 | 639   | 332216 | Osteochondropathies                                     | musculoskeletal         |
|        |         |        |       |       |        |       |        | Hemorrhage in early                                     |                         |
| 636.3  | PRS_PC1 | 0,058  | 0,031 | 1,060 | 0,0644 | 1084  | 331771 | pregnancy                                               | pregnancy complications |
| 555.21 | PRS_PC1 | 0,064  | 0,035 | 1,067 | 0,0649 | 853   | 332002 | Ulcerative colitis (chronic)                            | digestive               |
|        |         |        |       |       |        |       |        | Urethral stricture (not                                 |                         |
| 597.1  | PRS_PC1 | 0,028  | 0,015 | 1,029 | 0,0652 | 4472  | 328383 | specified as infectious)                                | genitourinary           |
| 728.7  | PRS_PC1 | -0,026 | 0,014 | 0,975 | 0,0658 | 5414  | 327441 | Fasciitis                                               | musculoskeletal         |
|        |         |        |       |       |        |       |        | Poisoning by primarily                                  |                         |
| 963    | PRS_PC1 | 0,110  | 0,060 | 1,117 | 0,0662 | 287   | 332568 | systemic agents                                         | injuries & poisonings   |

|        |         |        |       |       |        |       |        |                                             |                         |
|--------|---------|--------|-------|-------|--------|-------|--------|---------------------------------------------|-------------------------|
|        |         |        |       |       |        |       |        | Peritoneal or intestinal                    |                         |
| 560.3  | PRS_PC1 | 0,050  | 0,027 | 1,051 | 0,0674 | 1412  | 331443 | adhesions                                   | digestive               |
| 575    | PRS_PC1 | -0,023 | 0,013 | 0,977 | 0,0676 | 6513  | 326342 | Other biliary tract disease                 | digestive               |
| 070.9  | PRS_PC1 | -0,065 | 0,036 | 0,937 | 0,0683 | 807   | 332048 | Hepatitis NOS                               | infectious diseases     |
| 559    | PRS_PC1 | 0,038  | 0,021 | 1,039 | 0,0691 | 2393  | 330462 | Ileostomy status                            | digestive               |
| 274.2  | PRS_PC1 | -0,059 | 0,033 | 0,943 | 0,0698 | 975   | 331880 | Crystal arthropathies                       | endocrine/metabolic     |
| 751.21 | PRS_PC1 | 0,080  | 0,044 | 1,083 | 0,0713 | 533   | 332322 | Cystic kidney disease                       | congenital anomalies    |
| 960    | PRS_PC1 | 0,011  | 0,006 | 1,011 | 0,0730 | 28945 | 303910 | Poisoning by antibiotics                    | injuries & poisonings   |
| 500.2  | PRS_PC1 | 0,081  | 0,045 | 1,085 | 0,0739 | 503   | 332352 | Pneumoconiosis                              | respiratory             |
| 332    | PRS_PC1 | 0,038  | 0,021 | 1,038 | 0,0743 | 2371  | 330484 | Parkinson's disease                         | neurological            |
|        |         |        |       |       |        |       |        | Malposition and malpresentation of fetus or |                         |
| 652    | PRS_PC1 | 0,045  | 0,025 | 1,046 | 0,0746 | 1718  | 331137 | obstruction                                 | pregnancy complications |
| 374.3  | PRS_PC1 | -0,035 | 0,020 | 0,966 | 0,0761 | 2686  | 330169 | Ptosis of eyelid                            | sense organs            |
|        |         |        |       |       |        |       |        | Ganglion and cyst of                        |                         |
| 727.4  | PRS_PC1 | -0,029 | 0,016 | 0,971 | 0,0763 | 3898  | 328957 | synovium, tendon, and bursa                 | musculoskeletal         |
| 599.3  | PRS_PC1 | 0,045  | 0,025 | 1,046 | 0,0767 | 1609  | 331246 | Dysuria                                     | genitourinary           |
| 870.6  | PRS_PC1 | 0,104  | 0,059 | 1,110 | 0,0788 | 295   | 332560 | Open wound of neck                          | injuries & poisonings   |
| 628    | PRS_PC1 | 0,024  | 0,014 | 1,025 | 0,0791 | 5560  | 327295 | Ovarian cyst                                | genitourinary           |
| 250.7  | PRS_PC1 | -0,036 | 0,021 | 0,964 | 0,0799 | 2426  | 330429 | Diabetic retinopathy                        | endocrine/metabolic     |
|        |         |        |       |       |        |       |        | Breast conditions, congenital               |                         |
| 612    | PRS_PC1 | -0,056 | 0,032 | 0,946 | 0,0813 | 1022  | 331833 | or relating to hormones                     | genitourinary           |
| 389.4  | PRS_PC1 | 0,054  | 0,031 | 1,055 | 0,0817 | 1089  | 331766 | Tinnitus                                    | sense organs            |
|        |         |        |       |       |        |       |        | Stomatitis and mucositis                    |                         |
| 528.11 | PRS_PC1 | 0,069  | 0,040 | 1,071 | 0,0842 | 649   | 332206 | (ulcerative)                                | digestive               |
|        |         |        |       |       |        |       |        | Adverse drug events and drug                |                         |
| 979    | PRS_PC1 | 0,074  | 0,043 | 1,077 | 0,0859 | 550   | 332305 | allergies                                   | injuries & poisonings   |
| 274.21 | PRS_PC1 | -0,061 | 0,036 | 0,941 | 0,0875 | 812   | 332043 | Chondrocalcinosis                           | endocrine/metabolic     |
| 610.3  | PRS_PC1 | -0,091 | 0,053 | 0,913 | 0,0882 | 364   | 332491 | Fibrosclerosis of breast                    | genitourinary           |
| 280    | PRS_PC1 | -0,015 | 0,009 | 0,985 | 0,0893 | 14582 | 318273 | Iron deficiency anemias                     | hematopoietic           |

|        |         |        |       |       |        |       |        |                                                                     |                         |
|--------|---------|--------|-------|-------|--------|-------|--------|---------------------------------------------------------------------|-------------------------|
| 70     | PRS_PC1 | 0,064  | 0,037 | 1,066 | 0,0897 | 738   | 332117 | Viral hepatitis                                                     | infectious diseases     |
| 1005   | PRS_PC1 | 0,040  | 0,024 | 1,041 | 0,0902 | 1842  | 331013 | Other symptoms                                                      | symptoms                |
| 389.1  | PRS_PC1 | -0,051 | 0,030 | 0,951 | 0,0915 | 1152  | 331703 | Sensorineural hearing loss                                          | sense organs            |
| 760    | PRS_PC1 | 0,013  | 0,008 | 1,013 | 0,0935 | 17379 | 315476 | Back pain                                                           | symptoms                |
| 704.1  | PRS_PC1 | 0,109  | 0,065 | 1,115 | 0,0938 | 244   | 332611 | Alopecia                                                            | dermatologic            |
| 761    | PRS_PC1 | 0,032  | 0,019 | 1,033 | 0,0938 | 2800  | 330055 | Cervicalgia                                                         | symptoms                |
| 524.3  | PRS_PC1 | 0,089  | 0,053 | 1,093 | 0,0943 | 367   | 332488 | Anomalies of tooth position/malocclusion                            | digestive               |
| 324    | PRS_PC1 | 0,080  | 0,048 | 1,084 | 0,0947 | 450   | 332405 | Other CNS infection and poliomyelitis                               | neurological            |
| 524    | PRS_PC1 | 0,084  | 0,050 | 1,088 | 0,0949 | 409   | 332446 | Dentofacial anomalies, including malocclusion                       | digestive               |
| 591    | PRS_PC1 | 0,012  | 0,007 | 1,013 | 0,0962 | 19950 | 312905 | Urinary tract infection                                             | genitourinary           |
| 611.3  | PRS_PC1 | 0,040  | 0,024 | 1,041 | 0,0966 | 1773  | 331082 | Lump or mass in breast                                              | genitourinary           |
| 433.31 | PRS_PC1 | 0,030  | 0,018 | 1,030 | 0,0967 | 3222  | 329633 | Transient cerebral ischemia                                         | circulatory system      |
| 285.2  | PRS_PC1 | -0,049 | 0,029 | 0,952 | 0,0969 | 1206  | 331649 | Anemia of chronic disease                                           | hematopoietic           |
| 655    | PRS_PC1 | 0,028  | 0,017 | 1,028 | 0,0971 | 4321  | 328534 | Known or suspected fetal abnormality affecting management of mother | pregnancy complications |
| 411.3  | PRS_PC1 | -0,012 | 0,007 | 0,988 | 0,0984 | 22008 | 310847 | Angina pectoris                                                     | circulatory system      |
| 587    | PRS_PC1 | -0,077 | 0,047 | 0,926 | 0,0986 | 473   | 332382 | Kidney replaced by transpant                                        | genitourinary           |
| 157    | PRS_PC1 | 0,049  | 0,030 | 1,050 | 0,0988 | 1179  | 331676 | Pancreatic cancer                                                   | neoplasms               |
| 379.4  | PRS_PC1 | 0,117  | 0,071 | 1,124 | 0,0991 | 205   | 332650 | Anomalies of pupillary function                                     | sense organs            |
| 201    | PRS_PC1 | 0,090  | 0,055 | 1,094 | 0,0998 | 347   | 332508 | Hodgkin's disease                                                   | neoplasms               |
| 244.2  | PRS_PC1 | 0,110  | 0,067 | 1,116 | 0,1008 | 232   | 332623 | Acquired hypothyroidism                                             | endocrine/metabolic     |
| 634    | PRS_PC1 | 0,025  | 0,015 | 1,025 | 0,1012 | 5266  | 327589 | Miscarriage; stillbirth                                             | pregnancy complications |
| 614.1  | PRS_PC1 | 0,030  | 0,019 | 1,031 | 0,1015 | 3069  | 329786 | Pelvic peritoneal adhesions, female (postoperative) (postinfection) | genitourinary           |

|        |         |        |       |       |        |       |        |                                                                   |                         |
|--------|---------|--------|-------|-------|--------|-------|--------|-------------------------------------------------------------------|-------------------------|
| 429.3  | PRS_PC1 | 0,090  | 0,055 | 1,094 | 0,1023 | 345   | 332510 | Symptoms involving cardiovascular system                          | circulatory system      |
| 665    | PRS_PC1 | 0,025  | 0,016 | 1,026 | 0,1032 | 5333  | 327522 | Obstetrical/birth trauma                                          | pregnancy complications |
| 721    | PRS_PC1 | 0,014  | 0,009 | 1,014 | 0,1037 | 14571 | 318284 | Spondylosis and allied disorders                                  | musculoskeletal         |
| 442.8  | PRS_PC1 | 0,087  | 0,054 | 1,091 | 0,1042 | 360   | 332495 | Aneurysm of other specified artery                                | circulatory system      |
| 262    | PRS_PC1 | -0,063 | 0,039 | 0,938 | 0,1055 | 675   | 332180 | Mineral deficiency NEC                                            | endocrine/metabolic     |
| 530.7  | PRS_PC1 | 0,080  | 0,050 | 1,084 | 0,1057 | 419   | 332436 | Gastroesophageal laceration-hemorrhage syndrome                   | digestive               |
| 715.2  | PRS_PC1 | 0,066  | 0,041 | 1,068 | 0,1058 | 629   | 332226 | Ankylosing spondylitis                                            | musculoskeletal         |
| 402    | PRS_PC1 | 0,034  | 0,021 | 1,035 | 0,1062 | 2317  | 330538 | Elevated blood pressure reading without diagnosis of hypertension | symptoms                |
| 601.1  | PRS_PC1 | 0,035  | 0,022 | 1,036 | 0,1081 | 2182  | 330673 | Prostatitis                                                       | genitourinary           |
| 433.8  | PRS_PC1 | 0,034  | 0,021 | 1,035 | 0,1083 | 2309  | 330546 | Late effects of cerebrovascular disease                           | circulatory system      |
| 743.21 | PRS_PC1 | -0,058 | 0,036 | 0,944 | 0,1084 | 805   | 332050 | Pathologic fracture of vertebrae                                  | musculoskeletal         |
| 612.2  | PRS_PC1 | -0,053 | 0,033 | 0,948 | 0,1087 | 936   | 331919 | Hypertrophy of breast (Gynecomastia)                              | genitourinary           |
| 386.3  | PRS_PC1 | 0,049  | 0,031 | 1,051 | 0,1095 | 1090  | 331765 | Labyrinthitis                                                     | sense organs            |
| 703.1  | PRS_PC1 | -0,049 | 0,031 | 0,952 | 0,1096 | 1113  | 331742 | Ingrowing nail                                                    | dermatologic            |
| 594.1  | PRS_PC1 | -0,024 | 0,015 | 0,976 | 0,1097 | 4486  | 328369 | Calculus of kidney                                                | genitourinary           |
| 362.6  | PRS_PC1 | -0,102 | 0,064 | 0,903 | 0,1116 | 252   | 332603 | Peripheral retinal degenerations                                  | sense organs            |
| 070.3  | PRS_PC1 | 0,096  | 0,061 | 1,101 | 0,1126 | 283   | 332572 | Viral hepatitis C                                                 | infectious diseases     |
| 870.1  | PRS_PC1 | 0,055  | 0,035 | 1,056 | 0,1130 | 868   | 331987 | Open wound or laceration of eye or eyelid                         | injuries & poisonings   |
| 618    | PRS_PC1 | 0,014  | 0,009 | 1,014 | 0,1139 | 14511 | 318344 | Genital prolapse                                                  | genitourinary           |



|        |         |        |       |       |        |       |        |                                                                                     |                         |
|--------|---------|--------|-------|-------|--------|-------|--------|-------------------------------------------------------------------------------------|-------------------------|
| 528.7  | PRS_PC1 | 0,083  | 0,053 | 1,087 | 0,1144 | 374   | 332481 | Sialolithiasis                                                                      | digestive               |
| 483    | PRS_PC1 | 0,084  | 0,053 | 1,088 | 0,1144 | 364   | 332491 | Acute bronchitis and<br>bronchiolitis                                               | respiratory             |
| 751.22 | PRS_PC1 | 0,069  | 0,044 | 1,071 | 0,1163 | 537   | 332318 | Other specified congenital<br>anomalies of kidney                                   | congenital anomalies    |
| 375.2  | PRS_PC1 | -0,045 | 0,029 | 0,956 | 0,1180 | 1266  | 331589 | Epiphora                                                                            | sense organs            |
| 571.81 | PRS_PC1 | 0,051  | 0,032 | 1,052 | 0,1185 | 986   | 331869 | Portal hypertension                                                                 | digestive               |
| 008.5  | PRS_PC1 | 0,026  | 0,017 | 1,027 | 0,1191 | 3705  | 329150 | Bacterial enteritis                                                                 | infectious diseases     |
| 526    | PRS_PC1 | 0,043  | 0,028 | 1,044 | 0,1192 | 1337  | 331518 | Diseases of the jaws                                                                | digestive               |
| 564.8  | PRS_PC1 | 0,029  | 0,019 | 1,029 | 0,1210 | 3020  | 329835 | Abnormal findings on exam of<br>gastrointestinal tract/<br>abdominal area           | symptoms                |
| 550.2  | PRS_PC1 | 0,009  | 0,005 | 1,009 | 0,1211 | 39705 | 293150 | Diaphragmatic hernia                                                                | digestive               |
| 634.1  | PRS_PC1 | 0,048  | 0,031 | 1,049 | 0,1212 | 1133  | 331722 | Missed abortion/Hydatidiform<br>mole                                                | pregnancy complications |
| 440    | PRS_PC1 | -0,032 | 0,021 | 0,969 | 0,1212 | 2476  | 330379 | Atherosclerosis                                                                     | circulatory system      |
| 350.2  | PRS_PC1 | 0,021  | 0,014 | 1,021 | 0,1212 | 5778  | 327077 | Abnormality of gait                                                                 | neurological            |
| 187    | PRS_PC1 | 0,059  | 0,038 | 1,061 | 0,1213 | 715   | 332140 | Cancer of other male genital<br>organs                                              | neoplasms               |
| 474.1  | PRS_PC1 | -0,060 | 0,039 | 0,941 | 0,1224 | 680   | 332175 | Acute tonsillitis                                                                   | respiratory             |
| 608    | PRS_PC1 | 0,027  | 0,017 | 1,027 | 0,1227 | 3506  | 329349 | Other disorders of male<br>genital organs                                           | genitourinary           |
| 331    | PRS_PC1 | 0,032  | 0,021 | 1,033 | 0,1233 | 2415  | 330440 | Other cerebral degenerations                                                        | neurological            |
| 962.3  | PRS_PC1 | 0,065  | 0,042 | 1,067 | 0,1237 | 585   | 332270 | Hormones and synthetic<br>substitutes causing adverse<br>effects in therapeutic use | injuries & poisonings   |
| 531    | PRS_PC1 | 0,016  | 0,010 | 1,016 | 0,1249 | 10441 | 322414 | Peptic ulcer (excl. esophageal)                                                     | digestive               |
| 270.3  | PRS_PC1 | -0,056 | 0,037 | 0,945 | 0,1260 | 764   | 332091 | Disorders of plasma protein<br>metabolism                                           | endocrine/metabolic     |

|        |         |        |       |       |        |       |        |                                                       |                      |
|--------|---------|--------|-------|-------|--------|-------|--------|-------------------------------------------------------|----------------------|
| 425.1  | PRS_PC1 | -0,034 | 0,022 | 0,967 | 0,1270 | 2120  | 330735 | Primary/intrinsic<br>cardiomyopathies                 | circulatory system   |
| 250.24 | PRS_PC1 | -0,048 | 0,031 | 0,953 | 0,1271 | 1048  | 331807 | Type 2 diabetes with<br>neurological manifestations   | endocrine/metabolic  |
| 765    | PRS_PC1 | -0,056 | 0,037 | 0,946 | 0,1277 | 773   | 332082 | Cervical radiculitis                                  | symptoms             |
| 728.71 | PRS_PC1 | -0,022 | 0,015 | 0,978 | 0,1280 | 4876  | 327979 | Contracture of palmar fascia<br>[Dupuytren's disease] | musculoskeletal      |
| 153    | PRS_PC1 | 0,019  | 0,012 | 1,019 | 0,1293 | 6854  | 326001 | Colorectal cancer                                     | neoplasms            |
| 415    | PRS_PC1 | -0,019 | 0,012 | 0,981 | 0,1298 | 6855  | 326000 | Pulmonary heart disease                               | circulatory system   |
| 497    | PRS_PC1 | 0,049  | 0,032 | 1,050 | 0,1305 | 991   | 331864 | Bronchitis                                            | respiratory          |
| 627.4  | PRS_PC1 | -0,083 | 0,055 | 0,920 | 0,1312 | 344   | 332511 | Premenopausal menorrhagia                             | genitourinary        |
| 732.1  | PRS_PC1 | -0,091 | 0,060 | 0,913 | 0,1316 | 287   | 332568 | Juvenile osteochondrosis                              | musculoskeletal      |
| 782.6  | PRS_PC1 | 0,085  | 0,056 | 1,089 | 0,1317 | 326   | 332529 | Pallor and flushing                                   | symptoms             |
| 253.1  | PRS_PC1 | 0,100  | 0,067 | 1,106 | 0,1318 | 233   | 332622 | Pituitary hyperfunction                               | endocrine/metabolic  |
| 334    | PRS_PC1 | -0,028 | 0,019 | 0,972 | 0,1328 | 3020  | 329835 | Degenerative disease of the<br>spinal cord            | neurological         |
| 480.2  | PRS_PC1 | 0,067  | 0,045 | 1,070 | 0,1330 | 517   | 332338 | Viral pneumonia                                       | respiratory          |
| 509    | PRS_PC1 | 0,020  | 0,013 | 1,020 | 0,1357 | 6115  | 326740 | Respiratory failure,<br>insufficiency, arrest         | respiratory          |
| 729    | PRS_PC1 | 0,016  | 0,011 | 1,016 | 0,1367 | 9085  | 323770 | Other disorders of soft tissues                       | musculoskeletal      |
| 535    | PRS_PC1 | 0,008  | 0,005 | 1,008 | 0,1372 | 41315 | 291540 | Gastritis and duodenitis                              | digestive            |
| 535.6  | PRS_PC1 | 0,015  | 0,010 | 1,015 | 0,1379 | 10484 | 322371 | Duodenitis                                            | digestive            |
| 705    | PRS_PC1 | 0,090  | 0,061 | 1,095 | 0,1387 | 277   | 332578 | Disorders of sweat glands                             | dermatologic         |
| 726.3  | PRS_PC1 | -0,045 | 0,030 | 0,956 | 0,1389 | 1134  | 331721 | Bursitis                                              | musculoskeletal      |
| 749    | PRS_PC1 | 0,079  | 0,053 | 1,082 | 0,1391 | 362   | 332493 | Congenital anomalies of face<br>and neck              | congenital anomalies |
| 598.9  | PRS_PC1 | -0,065 | 0,044 | 0,937 | 0,1404 | 530   | 332325 | Other nonspecific findings on<br>examination of urine | symptoms             |

|        |         |        |       |       |        |       |        |                                                                        |                       |
|--------|---------|--------|-------|-------|--------|-------|--------|------------------------------------------------------------------------|-----------------------|
| 733.8  | PRS_PC1 | -0,037 | 0,025 | 0,964 | 0,1406 | 1642  | 331213 | Malunion and nonunion of fracture                                      | musculoskeletal       |
| 425    | PRS_PC1 | -0,032 | 0,022 | 0,968 | 0,1408 | 2183  | 330672 | Cardiomyopathy                                                         | circulatory system    |
| 426.4  | PRS_PC1 | 0,091  | 0,062 | 1,095 | 0,1414 | 272   | 332583 | Anomalous atrioventricular excitation                                  | circulatory system    |
| 1007   | PRS_PC1 | 0,079  | 0,054 | 1,082 | 0,1414 | 357   | 332498 | Injury to blood vessels                                                | injuries & poisonings |
| 477    | PRS_PC1 | 0,025  | 0,017 | 1,025 | 0,1429 | 3632  | 329223 | Epistaxis or throat hemorrhage                                         | respiratory           |
| 038.1  | PRS_PC1 | -0,033 | 0,022 | 0,968 | 0,1431 | 2088  | 330767 | Gram negative septicemia                                               | infectious diseases   |
| 507    | PRS_PC1 | 0,014  | 0,009 | 1,014 | 0,1434 | 12508 | 320347 | Pleurisy; pleural effusion                                             | respiratory           |
| 290.12 | PRS_PC1 | 0,101  | 0,069 | 1,106 | 0,1458 | 216   | 332639 | Dementia with cerebral degenerations                                   | mental disorders      |
| 286.12 | PRS_PC1 | -0,075 | 0,051 | 0,928 | 0,1459 | 394   | 332461 | Congenital deficiency of other clotting factors (including factor VII) | hematopoietic         |
| 550.4  | PRS_PC1 | -0,021 | 0,014 | 0,980 | 0,1463 | 5230  | 327625 | Umbilical hernia                                                       | digestive             |
| 597    | PRS_PC1 | 0,020  | 0,014 | 1,021 | 0,1473 | 5358  | 327497 | Other disorders of urethra and urinary tract                           | genitourinary         |
| 519.2  | PRS_PC1 | 0,075  | 0,052 | 1,078 | 0,1477 | 388   | 332467 | Respiratory complications                                              | respiratory           |
| 741    | PRS_PC1 | -0,020 | 0,014 | 0,980 | 0,1500 | 5399  | 327456 | Symptoms and disorders of the joints                                   | musculoskeletal       |
| 323    | PRS_PC1 | 0,064  | 0,044 | 1,066 | 0,1503 | 527   | 332328 | Encephalitis                                                           | neurological          |
| 425.11 | PRS_PC1 | -0,102 | 0,071 | 0,903 | 0,1510 | 204   | 332651 | Hypertrophic obstructive cardiomyopathy                                | circulatory system    |
| 204.1  | PRS_PC1 | -0,048 | 0,034 | 0,953 | 0,1515 | 917   | 331938 | Lymphoid leukemia                                                      | neoplasms             |
| 200    | PRS_PC1 | -0,036 | 0,025 | 0,964 | 0,1521 | 1609  | 331246 | Myeloproliferative disease                                             | neoplasms             |
| 276.13 | PRS_PC1 | -0,030 | 0,021 | 0,970 | 0,1526 | 2367  | 330488 | Hyperpotassemia                                                        | endocrine/metabolic   |
| 1008   | PRS_PC1 | 0,036  | 0,025 | 1,037 | 0,1526 | 1623  | 331232 | Crushing or internal injury to organs                                  | injuries & poisonings |

|       |         |        |       |       |        |       |        |                                                                            |                         |
|-------|---------|--------|-------|-------|--------|-------|--------|----------------------------------------------------------------------------|-------------------------|
| 636   | PRS_PC1 | 0,030  | 0,021 | 1,030 | 0,1529 | 2547  | 330308 | Early or threatened labor;<br>hemorrhage in early<br>pregnancy             | pregnancy complications |
| 574.3 | PRS_PC1 | -0,024 | 0,017 | 0,977 | 0,1530 | 3804  | 329051 | Cholecystitis without<br>cholelithiasis                                    | digestive               |
| 289.5 | PRS_PC1 | -0,048 | 0,034 | 0,953 | 0,1538 | 901   | 331954 | Diseases of spleen                                                         | hematopoietic           |
| 1011  | PRS_PC1 | -0,021 | 0,014 | 0,980 | 0,1539 | 5061  | 327794 | Complications of surgical and<br>medical procedures                        | injuries & poisonings   |
| 738   | PRS_PC1 | 0,025  | 0,018 | 1,026 | 0,1540 | 3302  | 329553 | Other acquired<br>musculoskeletal deformity                                | musculoskeletal         |
| 550   | PRS_PC1 | 0,006  | 0,005 | 1,006 | 0,1540 | 64557 | 268298 | Abdominal hernia                                                           | digestive               |
| 611   | PRS_PC1 | 0,034  | 0,024 | 1,034 | 0,1543 | 1849  | 331006 | Abnormal findings on<br>mammogram or breast exam                           | genitourinary           |
| 289.3 | PRS_PC1 | 0,057  | 0,040 | 1,058 | 0,1544 | 653   | 332202 | Personal history of diseases of<br>blood and blood-forming<br>organs       | hematopoietic           |
| 735.1 | PRS_PC1 | 0,079  | 0,056 | 1,082 | 0,1551 | 335   | 332520 | Flat foot                                                                  | musculoskeletal         |
| 706   | PRS_PC1 | 0,014  | 0,010 | 1,014 | 0,1553 | 10453 | 322402 | Diseases of sebaceous glands                                               | dermatologic            |
| 427.6 | PRS_PC1 | 0,035  | 0,025 | 1,036 | 0,1579 | 1675  | 331180 | Premature beats                                                            | circulatory system      |
| 274   | PRS_PC1 | -0,017 | 0,012 | 0,983 | 0,1587 | 7499  | 325356 | Gout and other crystal<br>arthropathies                                    | endocrine/metabolic     |
| 974   | PRS_PC1 | 0,097  | 0,069 | 1,102 | 0,1590 | 218   | 332637 | Poisoning by water, mineral,<br>and uric acid metabolism<br>drugs          | injuries & poisonings   |
| 290.1 | PRS_PC1 | 0,023  | 0,017 | 1,023 | 0,1628 | 3858  | 328997 | Dementias                                                                  | mental disorders        |
| 627.2 | PRS_PC1 | 0,098  | 0,071 | 1,103 | 0,1640 | 208   | 332647 | Symptomatic menopause                                                      | genitourinary           |
| 369.5 | PRS_PC1 | 0,068  | 0,049 | 1,070 | 0,1646 | 433   | 332422 | Conjunctivitis, infectious                                                 | sense organs            |
| 227.3 | PRS_PC1 | 0,066  | 0,047 | 1,068 | 0,1651 | 465   | 332390 | Benign neoplasm of pituitary<br>gland and craniopharyngeal<br>duct (pouch) | neoplasms               |

|        |         |        |       |       |        |       |        |                                                              |                       |
|--------|---------|--------|-------|-------|--------|-------|--------|--------------------------------------------------------------|-----------------------|
| 368.2  | PRS_PC1 | -0,041 | 0,029 | 0,960 | 0,1652 | 1208  | 331647 | Diplopia and disorders of binocular vision                   | sense organs          |
| 750.21 | PRS_PC1 | 0,075  | 0,054 | 1,077 | 0,1670 | 356   | 332499 | Congenital anomalies of intestine                            | congenital anomalies  |
| 800.4  | PRS_PC1 | -0,045 | 0,033 | 0,956 | 0,1679 | 974   | 331881 | Fracture of patella                                          | injuries & poisonings |
| 523.32 | PRS_PC1 | 0,038  | 0,028 | 1,039 | 0,1713 | 1348  | 331507 | Chronic periodontitis                                        | digestive             |
| 854    | PRS_PC1 | -0,022 | 0,016 | 0,978 | 0,1716 | 3891  | 328964 | Complications of cardiac/vascular device, implant, and graft | injuries & poisonings |
| 288    | PRS_PC1 | -0,039 | 0,028 | 0,962 | 0,1733 | 1279  | 331576 | Diseases of white blood cells                                | hematopoietic         |
| 292.6  | PRS_PC1 | 0,057  | 0,042 | 1,058 | 0,1734 | 602   | 332253 | Hallucinations                                               | mental disorders      |
| 411.41 | PRS_PC1 | -0,041 | 0,030 | 0,960 | 0,1741 | 1156  | 331699 | Aneurysm and dissection of heart                             | circulatory system    |
| 531.1  | PRS_PC1 | 0,046  | 0,034 | 1,047 | 0,1746 | 894   | 331961 | Hemorrhage from gastrointestinal ulcer                       | digestive             |
| 594.2  | PRS_PC1 | -0,040 | 0,030 | 0,961 | 0,1751 | 1192  | 331663 | Calculus of lower urinary tract                              | genitourinary         |
| 960.2  | PRS_PC1 | 0,009  | 0,007 | 1,009 | 0,1753 | 24381 | 308474 | Allergy/adverse effect of penicillin                         | injuries & poisonings |
| 204.12 | PRS_PC1 | -0,048 | 0,036 | 0,953 | 0,1756 | 817   | 332038 | Lymphoid leukemia, chronic                                   | neoplasms             |
| 961    | PRS_PC1 | 0,052  | 0,038 | 1,053 | 0,1762 | 706   | 332149 | Poisoning by other anti-infectives                           | injuries & poisonings |
| 938.2  | PRS_PC1 | -0,069 | 0,051 | 0,933 | 0,1762 | 401   | 332454 | Chronic dermatitis due to solar radiation                    | dermatologic          |
| 509.1  | PRS_PC1 | 0,020  | 0,015 | 1,020 | 0,1783 | 5007  | 327848 | Respiratory failure                                          | respiratory           |
| 441    | PRS_PC1 | -0,040 | 0,030 | 0,960 | 0,1792 | 1156  | 331699 | Vascular insufficiency of intestine                          | circulatory system    |
| 571    | PRS_PC1 | 0,018  | 0,013 | 1,018 | 0,1793 | 6077  | 326778 | Chronic liver disease and cirrhosis                          | digestive             |

|        |         |        |       |       |        |       |        |                                                                                                                         |                       |
|--------|---------|--------|-------|-------|--------|-------|--------|-------------------------------------------------------------------------------------------------------------------------|-----------------------|
| 530.5  | PRS_PC1 | 0,042  | 0,031 | 1,043 | 0,1819 | 1050  | 331805 | Disorders of esophageal motility                                                                                        | digestive             |
| 270.32 | PRS_PC1 | -0,053 | 0,040 | 0,948 | 0,1832 | 648   | 332207 | Paraproteinemia                                                                                                         | endocrine/metabolic   |
| 250.4  | PRS_PC1 | 0,034  | 0,026 | 1,035 | 0,1834 | 1581  | 331274 | Abnormal glucose                                                                                                        | endocrine/metabolic   |
| 793.2  | PRS_PC1 | -0,043 | 0,032 | 0,958 | 0,1840 | 986   | 331869 | Nonspecific abnormal findings on radiological and other examination of other intrathoracic organs (echocardiogram, etc) | symptoms              |
| 972    | PRS_PC1 | 0,074  | 0,056 | 1,077 | 0,1858 | 328   | 332527 | Poisoning by agents primarily affecting the cardiovascular system                                                       | injuries & poisonings |
| 840    | PRS_PC1 | -0,054 | 0,041 | 0,947 | 0,1864 | 614   | 332241 | Sprains and strains                                                                                                     | injuries & poisonings |
| 452    | PRS_PC1 | -0,042 | 0,032 | 0,959 | 0,1870 | 1015  | 331840 | Other venous embolism and thrombosis                                                                                    | circulatory system    |
| 250.6  | PRS_PC1 | -0,047 | 0,036 | 0,954 | 0,1870 | 811   | 332044 | Polyneuropathy in diabetes                                                                                              | endocrine/metabolic   |
| 705.3  | PRS_PC1 | 0,091  | 0,069 | 1,095 | 0,1878 | 216   | 332639 | Hidradenitis                                                                                                            | dermatologic          |
| 420.2  | PRS_PC1 | -0,028 | 0,021 | 0,972 | 0,1878 | 2271  | 330584 | Pericarditis                                                                                                            | circulatory system    |
| 446.4  | PRS_PC1 | -0,087 | 0,066 | 0,916 | 0,1889 | 235   | 332620 | Wegener's granulomatosis                                                                                                | circulatory system    |
| 038.2  | PRS_PC1 | -0,044 | 0,034 | 0,957 | 0,1911 | 909   | 331946 | Gram positive septicemia                                                                                                | infectious diseases   |
| 742.9  | PRS_PC1 | -0,023 | 0,017 | 0,978 | 0,1913 | 3460  | 329395 | Other derangement of joint                                                                                              | musculoskeletal       |
| 614    | PRS_PC1 | 0,016  | 0,012 | 1,016 | 0,1923 | 7083  | 325772 | Inflammatory diseases of female pelvic organs                                                                           | genitourinary         |
| 723    | PRS_PC1 | -0,046 | 0,035 | 0,955 | 0,1927 | 827   | 332028 | Other disorders of cervical region                                                                                      | musculoskeletal       |
| 623    | PRS_PC1 | 0,035  | 0,027 | 1,036 | 0,1933 | 1406  | 331449 | Hypertrophy of female genital organs                                                                                    | genitourinary         |
| 535.8  | PRS_PC1 | 0,012  | 0,009 | 1,012 | 0,1934 | 13695 | 319160 | Other specified gastritis                                                                                               | digestive             |
| 531.3  | PRS_PC1 | 0,021  | 0,016 | 1,021 | 0,1940 | 3983  | 328872 | Duodenal ulcer                                                                                                          | digestive             |
| 686.3  | PRS_PC1 | -0,052 | 0,040 | 0,949 | 0,1948 | 648   | 332207 | Pilonidal cyst                                                                                                          | dermatologic          |

|        |         |        |       |       |        |      |        |                                                                     |                       |
|--------|---------|--------|-------|-------|--------|------|--------|---------------------------------------------------------------------|-----------------------|
| 512.1  | PRS_PC1 | 0,063  | 0,049 | 1,065 | 0,1948 | 438  | 332417 | Wheezing                                                            | respiratory           |
| 529.1  | PRS_PC1 | -0,063 | 0,049 | 0,939 | 0,1948 | 438  | 332417 | Glossitis                                                           | digestive             |
| 411.1  | PRS_PC1 | -0,017 | 0,013 | 0,983 | 0,1954 | 6078 | 326777 | Unstable angina<br>(intermediate coronary<br>syndrome)              | circulatory system    |
| 572    | PRS_PC1 | 0,025  | 0,019 | 1,025 | 0,1960 | 2760 | 330095 | Ascites (non malignant)                                             | digestive             |
| 180.3  | PRS_PC1 | 0,029  | 0,022 | 1,029 | 0,1960 | 2147 | 330708 | Cervical intraepithelial<br>neoplasia [CIN] [Cervical<br>dysplasia] | neoplasms             |
| 800.2  | PRS_PC1 | -0,034 | 0,026 | 0,967 | 0,1971 | 1541 | 331314 | Fracture of unspecified part of<br>femur                            | injuries & poisonings |
| 624.1  | PRS_PC1 | 0,062  | 0,048 | 1,064 | 0,1987 | 452  | 332403 | Dystrophy of female genital<br>tract                                | genitourinary         |
| 375    | PRS_PC1 | -0,022 | 0,017 | 0,978 | 0,1994 | 3459 | 329396 | Disorders of lacrimal system                                        | sense organs          |
| 189    | PRS_PC1 | -0,017 | 0,013 | 0,983 | 0,2012 | 6225 | 326630 | Cancer of urinary organs (incl.<br>kidney and bladder)              | neoplasms             |
| 735.3  | PRS_PC1 | 0,015  | 0,011 | 1,015 | 0,2016 | 8225 | 324630 | Hallux valgus (Bunion)                                              | musculoskeletal       |
| 277.4  | PRS_PC1 | 0,050  | 0,039 | 1,051 | 0,2044 | 665  | 332190 | Disorders of bilirubin excretion                                    | endocrine/metabolic   |
| 426.21 | PRS_PC1 | -0,026 | 0,020 | 0,975 | 0,2055 | 2589 | 330266 | First degree AV block                                               | circulatory system    |
| 586.4  | PRS_PC1 | -0,033 | 0,026 | 0,967 | 0,2077 | 1494 | 331361 | Stricture/obstruction of ureter                                     | genitourinary         |
| 702.1  | PRS_PC1 | -0,019 | 0,015 | 0,981 | 0,2094 | 4760 | 328095 | Actinic keratosis                                                   | dermatologic          |
| 361.1  | PRS_PC1 | -0,028 | 0,023 | 0,972 | 0,2110 | 2024 | 330831 | Retinal detachment with<br>retinal defect                           | sense organs          |
| 292.3  | PRS_PC1 | 0,036  | 0,029 | 1,037 | 0,2130 | 1232 | 331623 | Memory loss                                                         | mental disorders      |
| 204    | PRS_PC1 | -0,024 | 0,020 | 0,976 | 0,2133 | 2735 | 330120 | Leukemia                                                            | neoplasms             |
| 371    | PRS_PC1 | 0,020  | 0,016 | 1,020 | 0,2134 | 4051 | 328804 | Inflammation of the eye                                             | sense organs          |
| 701.5  | PRS_PC1 | -0,050 | 0,040 | 0,951 | 0,2140 | 644  | 332211 | Abnormal granulation tissue                                         | dermatologic          |

|        |         |        |       |       |        |       |        |                                                                          |                       |
|--------|---------|--------|-------|-------|--------|-------|--------|--------------------------------------------------------------------------|-----------------------|
| 270    | PRS_PC1 | -0,044 | 0,035 | 0,957 | 0,2160 | 832   | 332023 | Disorders of protein plasma/amino-acid transport and metabolism          | endocrine/metabolic   |
| 766    | PRS_PC1 | -0,027 | 0,022 | 0,974 | 0,2163 | 2213  | 330642 | Neuralgia, neuritis, and radiculitis NOS                                 | symptoms              |
| 695.9  | PRS_PC1 | 0,044  | 0,035 | 1,045 | 0,2165 | 836   | 332019 | Unspecified erythematous condition                                       | dermatologic          |
| 316    | PRS_PC1 | 0,050  | 0,040 | 1,051 | 0,2178 | 641   | 332214 | Substance addiction and disorders                                        | mental disorders      |
| 800.3  | PRS_PC1 | 0,024  | 0,020 | 1,024 | 0,2179 | 2702  | 330153 | Fracture of tibia and fibula                                             | injuries & poisonings |
| 706.2  | PRS_PC1 | 0,012  | 0,010 | 1,013 | 0,2188 | 10343 | 322512 | Sebaceous cyst                                                           | dermatologic          |
| 577    | PRS_PC1 | -0,022 | 0,018 | 0,978 | 0,2195 | 3291  | 329564 | Diseases of pancreas                                                     | digestive             |
| 750.13 | PRS_PC1 | 0,070  | 0,057 | 1,072 | 0,2200 | 321   | 332534 | Congenital anomalies of mouth/tongue                                     | congenital anomalies  |
| 221    | PRS_PC1 | 0,077  | 0,063 | 1,080 | 0,2200 | 261   | 332594 | Benign neoplasm of other female genital organs                           | neoplasms             |
| 222    | PRS_PC1 | 0,086  | 0,070 | 1,090 | 0,2200 | 208   | 332647 | Benign neoplasm of male genital organs                                   | neoplasms             |
| 327    | PRS_PC1 | 0,031  | 0,025 | 1,031 | 0,2206 | 1635  | 331220 | Sleep disorders                                                          | neurological          |
| 250.13 | PRS_PC1 | -0,049 | 0,040 | 0,953 | 0,2218 | 656   | 332199 | Type 1 diabetes with ophthalmic manifestations                           | endocrine/metabolic   |
| 41     | PRS_PC1 | 0,010  | 0,008 | 1,010 | 0,2242 | 17950 | 314905 | Bacterial infection NOS                                                  | infectious diseases   |
| 204.2  | PRS_PC1 | 0,046  | 0,038 | 1,047 | 0,2286 | 711   | 332144 | Myeloid leukemia                                                         | neoplasms             |
| 378.1  | PRS_PC1 | 0,035  | 0,029 | 1,036 | 0,2294 | 1212  | 331643 | Strabismus (not specified as paralytic)                                  | sense organs          |
| 380.1  | PRS_PC1 | -0,045 | 0,037 | 0,956 | 0,2308 | 745   | 332110 | Otitis externa                                                           | sense organs          |
| 965.1  | PRS_PC1 | -0,021 | 0,018 | 0,979 | 0,2311 | 3409  | 329446 | Opiates and related narcotics causing adverse effects in therapeutic use | injuries & poisonings |



|        |         |        |       |       |        |       |        |                                                                      |                       |
|--------|---------|--------|-------|-------|--------|-------|--------|----------------------------------------------------------------------|-----------------------|
| 202    | PRS_PC1 | -0,021 | 0,017 | 0,980 | 0,2327 | 3507  | 329348 | Cancer of other lymphoid,<br>histiocytic tissue                      | neoplasms             |
| 807    | PRS_PC1 | 0,024  | 0,020 | 1,024 | 0,2369 | 2527  | 330328 | Fracture of ribs                                                     | injuries & poisonings |
| 198.5  | PRS_PC1 | 0,031  | 0,027 | 1,032 | 0,2371 | 1472  | 331383 | Secondary malignancy of<br>brain/spine                               | neoplasms             |
| 444    | PRS_PC1 | -0,033 | 0,028 | 0,968 | 0,2377 | 1373  | 331482 | Arterial embolism and<br>thrombosis                                  | circulatory system    |
| 261.2  | PRS_PC1 | 0,026  | 0,022 | 1,027 | 0,2378 | 2075  | 330780 | Vitamin B-complex<br>deficiencies                                    | endocrine/metabolic   |
| 53     | PRS_PC1 | 0,045  | 0,038 | 1,046 | 0,2379 | 708   | 332147 | Herpes zoster                                                        | infectious diseases   |
| 571.5  | PRS_PC1 | 0,017  | 0,015 | 1,018 | 0,2393 | 4814  | 328041 | Other chronic nonalcoholic<br>liver disease                          | digestive             |
| 575.8  | PRS_PC1 | -0,028 | 0,023 | 0,973 | 0,2404 | 1893  | 330962 | Other disorders of biliary tract                                     | digestive             |
| 495.2  | PRS_PC1 | 0,069  | 0,058 | 1,071 | 0,2412 | 303   | 332552 | Asthma with exacerbation                                             | respiratory           |
| 244.4  | PRS_PC1 | -0,009 | 0,007 | 0,991 | 0,2426 | 21122 | 311733 | Hypothyroidism NOS                                                   | endocrine/metabolic   |
| 364.1  | PRS_PC1 | -0,082 | 0,071 | 0,921 | 0,2433 | 208   | 332647 | Corneal opacity                                                      | sense organs          |
| 287    | PRS_PC1 | 0,021  | 0,018 | 1,021 | 0,2438 | 3207  | 329648 | Purpura and other<br>hemorrhagic conditions                          | hematopoietic         |
| 386    | PRS_PC1 | 0,022  | 0,019 | 1,022 | 0,2443 | 3016  | 329839 | Vertiginous syndromes and<br>other disorders of vestibular<br>system | sense organs          |
| 371.1  | PRS_PC1 | -0,042 | 0,037 | 0,958 | 0,2463 | 774   | 332081 | Uveitis, noninfectious or NOS                                        | sense organs          |
| 315.1  | PRS_PC1 | 0,081  | 0,070 | 1,084 | 0,2471 | 213   | 332642 | Learning disorder                                                    | mental disorders      |
| 736.2  | PRS_PC1 | 0,066  | 0,057 | 1,068 | 0,2504 | 318   | 332537 | Acquired deformities of finger                                       | musculoskeletal       |
| 255.21 | PRS_PC1 | 0,046  | 0,040 | 1,047 | 0,2506 | 637   | 332218 | Glucocorticoid deficiency                                            | endocrine/metabolic   |
| 370.1  | PRS_PC1 | -0,079 | 0,069 | 0,924 | 0,2523 | 218   | 332637 | Corneal ulcer                                                        | sense organs          |
| 530.2  | PRS_PC1 | 0,021  | 0,019 | 1,022 | 0,2541 | 2959  | 329896 | Esophageal bleeding<br>(varices/hemorrhage)                          | digestive             |

|        |         |        |       |       |        |       |        |                                            |                       |
|--------|---------|--------|-------|-------|--------|-------|--------|--------------------------------------------|-----------------------|
|        |         |        |       |       |        |       |        | Septal Deviations/Turbinate                |                       |
| 470    | PRS_PC1 | 0,016  | 0,014 | 1,016 | 0,2542 | 5241  | 327614 | Hypertrophy                                | respiratory           |
| 555.1  | PRS_PC1 | 0,025  | 0,022 | 1,025 | 0,2547 | 2249  | 330606 | Regional enteritis                         | digestive             |
| 523.3  | PRS_PC1 | 0,030  | 0,026 | 1,030 | 0,2559 | 1523  | 331332 | Periodontitis (acute or chronic)           | digestive             |
| 567    | PRS_PC1 | 0,031  | 0,027 | 1,031 | 0,2563 | 1435  | 331420 | Peritonitis and retroperitoneal infections | digestive             |
| 530.1  | PRS_PC1 | 0,006  | 0,005 | 1,006 | 0,2574 | 49540 | 283315 | Esophagitis, GERD and related diseases     | digestive             |
| 261    | PRS_PC1 | 0,017  | 0,015 | 1,017 | 0,2580 | 4488  | 328367 | Vitamin deficiency                         | endocrine/metabolic   |
| 874    | PRS_PC1 | -0,075 | 0,066 | 0,928 | 0,2589 | 235   | 332620 | Complication of amputation stump           | injuries & poisonings |
| 441.1  | PRS_PC1 | -0,051 | 0,045 | 0,951 | 0,2590 | 514   | 332341 | Acute vascular insufficiency of intestine  | circulatory system    |
| 426.24 | PRS_PC1 | -0,032 | 0,028 | 0,969 | 0,2593 | 1310  | 331545 | Atrioventricular block, complete           | circulatory system    |
| 624    | PRS_PC1 | 0,033  | 0,029 | 1,034 | 0,2597 | 1220  | 331635 | Symptoms involving female genital tract    | genitourinary         |
| 614.33 | PRS_PC1 | -0,058 | 0,051 | 0,944 | 0,2611 | 395   | 332460 | Pelvic inflammatory disease, NOS           | genitourinary         |
| 360    | PRS_PC1 | 0,050  | 0,045 | 1,051 | 0,2636 | 520   | 332335 | Disorders of the globe                     | sense organs          |
| 705.8  | PRS_PC1 | 0,038  | 0,034 | 1,039 | 0,2638 | 904   | 331951 | Hyperhidrosis                              | dermatologic          |
| 426.2  | PRS_PC1 | -0,016 | 0,015 | 0,984 | 0,2659 | 4871  | 327984 | Atrioventricular [AV] block                | circulatory system    |
| 575.2  | PRS_PC1 | -0,031 | 0,027 | 0,970 | 0,2664 | 1380  | 331475 | Obstruction of bile duct                   | digestive             |
| 269    | PRS_PC1 | 0,052  | 0,047 | 1,053 | 0,2668 | 478   | 332377 | Proteinuria                                | endocrine/metabolic   |
| 360.2  | PRS_PC1 | 0,059  | 0,053 | 1,061 | 0,2673 | 369   | 332486 | Progressive myopia                         | sense organs          |
| 562.1  | PRS_PC1 | 0,006  | 0,005 | 1,006 | 0,2675 | 46141 | 286714 | Diverticulosis                             | digestive             |
| 626.8  | PRS_PC1 | 0,031  | 0,028 | 1,032 | 0,2680 | 1366  | 331489 | Infertility, female                        | genitourinary         |
| 561.2  | PRS_PC1 | 0,021  | 0,019 | 1,022 | 0,2689 | 2788  | 330067 | Flatulence                                 | digestive             |
| 601.12 | PRS_PC1 | 0,032  | 0,029 | 1,032 | 0,2689 | 1264  | 331591 | Chronic prostatitis                        | genitourinary         |

|        |         |        |       |       |        |       |        |                                |                      |
|--------|---------|--------|-------|-------|--------|-------|--------|--------------------------------|----------------------|
| 255.2  | PRS_PC1 | 0,045  | 0,040 | 1,046 | 0,2690 | 638   | 332217 | Adrenal hypofunction           | endocrine/metabolic  |
|        |         |        |       |       |        |       |        | Displacement of intervertebral |                      |
| 722.1  | PRS_PC1 | 0,042  | 0,038 | 1,043 | 0,2692 | 703   | 332152 | disc                           | musculoskeletal      |
| 344    | PRS_PC1 | 0,035  | 0,032 | 1,036 | 0,2692 | 1030  | 331825 | Other paralytic syndromes      | neurological         |
|        |         |        |       |       |        |       |        | Congenital anomalies of the    |                      |
| 753    | PRS_PC1 | -0,079 | 0,072 | 0,924 | 0,2720 | 200   | 332655 | eye                            | congenital anomalies |
| 430.2  | PRS_PC1 | 0,031  | 0,028 | 1,032 | 0,2722 | 1288  | 331567 | Intracerebral hemorrhage       | circulatory system   |
|        |         |        |       |       |        |       |        | Disorders of mineral           |                      |
| 275    | PRS_PC1 | 0,016  | 0,014 | 1,016 | 0,2724 | 5128  | 327727 | metabolism                     | endocrine/metabolic  |
|        |         |        |       |       |        |       |        | Benign neoplasm of             |                      |
|        |         |        |       |       |        |       |        | respiratory and intrathoracic  |                      |
| 212    | PRS_PC1 | 0,052  | 0,047 | 1,053 | 0,2733 | 468   | 332387 | organs                         | neoplasms            |
| 740.9  | PRS_PC1 | -0,008 | 0,007 | 0,992 | 0,2733 | 23287 | 309568 | Osteoarthritis NOS             | musculoskeletal      |
|        |         |        |       |       |        |       |        | Noninfectious disorders of     |                      |
| 450    | PRS_PC1 | -0,028 | 0,025 | 0,973 | 0,2734 | 1625  | 331230 | lymphatic channels             | circulatory system   |
| 585    | PRS_PC1 | -0,009 | 0,008 | 0,991 | 0,2752 | 17863 | 314992 | Renal failure                  | genitourinary        |
| 530.12 | PRS_PC1 | 0,014  | 0,013 | 1,014 | 0,2756 | 6378  | 326477 | Ulcer of esophagus             | digestive            |
| 580.1  | PRS_PC1 | 0,033  | 0,031 | 1,034 | 0,2760 | 1103  | 331752 | Glomerulonephritis             | genitourinary        |
|        |         |        |       |       |        |       |        | Atherosclerosis of the         |                      |
| 440.2  | PRS_PC1 | -0,030 | 0,027 | 0,971 | 0,2763 | 1413  | 331442 | extremities                    | circulatory system   |
| 369    | PRS_PC1 | 0,035  | 0,033 | 1,036 | 0,2769 | 976   | 331879 | Infection of the eye           | sense organs         |
| 509.2  | PRS_PC1 | 0,017  | 0,015 | 1,017 | 0,2772 | 4488  | 328367 | Respiratory insufficiency      | respiratory          |
|        |         |        |       |       |        |       |        | Menopausal and                 |                      |
| 627    | PRS_PC1 | 0,010  | 0,010 | 1,010 | 0,2776 | 12219 | 320636 | postmenopausal disorders       | genitourinary        |
| 600    | PRS_PC1 | 0,009  | 0,008 | 1,009 | 0,2780 | 18432 | 314423 | Hyperplasia of prostate        | genitourinary        |
|        |         |        |       |       |        |       |        | Occlusion and stenosis of      |                      |
| 433.1  | PRS_PC1 | 0,023  | 0,021 | 1,023 | 0,2784 | 2360  | 330495 | precerebral arteries           | circulatory system   |
| 285.22 | PRS_PC1 | 0,043  | 0,040 | 1,044 | 0,2791 | 643   | 332212 | Anemia in neoplastic disease   | hematopoietic        |
| 526.1  | PRS_PC1 | 0,054  | 0,050 | 1,055 | 0,2795 | 417   | 332438 | Cysts of the jaws              | digestive            |

|        |         |        |       |       |        |       |        |                                   |                       |
|--------|---------|--------|-------|-------|--------|-------|--------|-----------------------------------|-----------------------|
|        |         |        |       |       |        |       |        | Rash and other nonspecific        |                       |
| 687.1  | PRS_PC1 | 0,018  | 0,017 | 1,019 | 0,2828 | 3535  | 329320 | skin eruption                     | dermatologic          |
| 338    | PRS_PC1 | 0,032  | 0,030 | 1,032 | 0,2830 | 1187  | 331668 | Pain                              | neurological          |
| 595    | PRS_PC1 | -0,018 | 0,017 | 0,982 | 0,2832 | 3666  | 329189 | Hydronephrosis                    | genitourinary         |
| 244.1  | PRS_PC1 | -0,025 | 0,023 | 0,975 | 0,2833 | 1958  | 330897 | Secondary hypothyroidism          | endocrine/metabolic   |
|        |         |        |       |       |        |       |        | Diverticulum of esophagus,        |                       |
| 530.6  | PRS_PC1 | 0,067  | 0,062 | 1,069 | 0,2836 | 269   | 332586 | acquired                          | digestive             |
| 244    | PRS_PC1 | -0,008 | 0,007 | 0,992 | 0,2849 | 22169 | 310686 | Hypothyroidism                    | endocrine/metabolic   |
| 245    | PRS_PC1 | 0,053  | 0,050 | 1,055 | 0,2855 | 415   | 332440 | Thyroiditis                       | endocrine/metabolic   |
| 530.14 | PRS_PC1 | 0,009  | 0,009 | 1,009 | 0,2858 | 14634 | 318221 | Reflux esophagitis                | digestive             |
|        |         |        |       |       |        |       |        | Certain early complications of    |                       |
| 958    | PRS_PC1 | 0,039  | 0,036 | 1,039 | 0,2861 | 790   | 332065 | trauma or procedure               | injuries & poisonings |
| 383    | PRS_PC1 | -0,058 | 0,054 | 0,944 | 0,2869 | 353   | 332502 | Otosclerosis                      | sense organs          |
|        |         |        |       |       |        |       |        |                                   |                       |
| 755.1  | PRS_PC1 | -0,061 | 0,058 | 0,941 | 0,2873 | 313   | 332542 | Congenital deformities of feet    | congenital anomalies  |
| 756.5  | PRS_PC1 | 0,041  | 0,039 | 1,042 | 0,2877 | 693   | 332162 | Congenital osteodystrophies       | congenital anomalies  |
|        |         |        |       |       |        |       |        | Chronic tonsillitis and           |                       |
| 474.2  | PRS_PC1 | 0,030  | 0,028 | 1,030 | 0,2896 | 1301  | 331554 | adenoiditis                       | respiratory           |
| 184.11 | PRS_PC1 | 0,030  | 0,028 | 1,030 | 0,2900 | 1335  | 331520 | Malignant neoplasm of ovary       | neoplasms             |
| 287.3  | PRS_PC1 | 0,020  | 0,019 | 1,020 | 0,2906 | 2929  | 329926 | Thrombocytopenia                  | hematopoietic         |
| 433.12 | PRS_PC1 | -0,047 | 0,045 | 0,954 | 0,2908 | 521   | 332334 | Cerebral atherosclerosis          | circulatory system    |
|        |         |        |       |       |        |       |        |                                   |                       |
| 562    | PRS_PC1 | 0,005  | 0,005 | 1,005 | 0,2909 | 46184 | 286671 | Diverticulosis and diverticulitis | digestive             |
|        |         |        |       |       |        |       |        | Superficial cellulitis and        |                       |
| 681    | PRS_PC1 | 0,010  | 0,010 | 1,010 | 0,2918 | 11388 | 321467 | abscess                           | dermatologic          |
| 149.1  | PRS_PC1 | -0,056 | 0,053 | 0,945 | 0,2929 | 363   | 332492 | Cancer of oropharynx              | neoplasms             |
|        |         |        |       |       |        |       |        | Other symptoms involving          |                       |
| 579    | PRS_PC1 | 0,022  | 0,021 | 1,022 | 0,2930 | 2334  | 330521 | abdomen and pelvis                | digestive             |
| 442.2  | PRS_PC1 | 0,074  | 0,070 | 1,077 | 0,2938 | 210   | 332645 | Aneurysm of iliac artery          | circulatory system    |

|        |         |        |       |       |        |       |        |                                                 |                       |
|--------|---------|--------|-------|-------|--------|-------|--------|-------------------------------------------------|-----------------------|
| 589    | PRS_PC1 | 0,067  | 0,064 | 1,069 | 0,2959 | 252   | 332603 | Abnormal results of function<br>study of kidney | genitourinary         |
| 345.11 | PRS_PC1 | 0,043  | 0,041 | 1,043 | 0,2961 | 626   | 332229 | Generalized convulsive<br>epilepsy              | neurological          |
| 994    | PRS_PC1 | 0,012  | 0,012 | 1,012 | 0,2964 | 7886  | 324969 | Sepsis and SIRS                                 | injuries & poisonings |
| 994.2  | PRS_PC1 | 0,012  | 0,012 | 1,012 | 0,2964 | 7886  | 324969 | Sepsis                                          | injuries & poisonings |
| 414    | PRS_PC1 | -0,015 | 0,014 | 0,985 | 0,2971 | 5271  | 327584 | Other forms of chronic heart<br>disease         | circulatory system    |
| 190    | PRS_PC1 | 0,069  | 0,067 | 1,072 | 0,2990 | 233   | 332622 | Cancer of eye                                   | neoplasms             |
| 451    | PRS_PC1 | 0,014  | 0,013 | 1,014 | 0,2995 | 5827  | 327028 | Phlebitis and thrombophlebitis                  | circulatory system    |
| 174.11 | PRS_PC1 | -0,009 | 0,009 | 0,991 | 0,3001 | 15714 | 317141 | Malignant neoplasm of<br>female breast          | neoplasms             |
| 277    | PRS_PC1 | 0,023  | 0,022 | 1,023 | 0,3009 | 2151  | 330704 | Other disorders of<br>metabolism                | endocrine/metabolic   |
| 334.2  | PRS_PC1 | -0,052 | 0,050 | 0,950 | 0,3011 | 415   | 332440 | Anterior horn cell disease                      | neurological          |
| 871.3  | PRS_PC1 | 0,068  | 0,066 | 1,070 | 0,3035 | 239   | 332616 | Open wound of foot except<br>toe(s) alone       | injuries & poisonings |
| 380.4  | PRS_PC1 | -0,047 | 0,046 | 0,954 | 0,3038 | 487   | 332368 | Impacted cerumen                                | sense organs          |
| 510    | PRS_PC1 | 0,023  | 0,022 | 1,023 | 0,3038 | 2138  | 330717 | Other diseases of lung                          | respiratory           |
| 741.5  | PRS_PC1 | -0,074 | 0,072 | 0,929 | 0,3043 | 200   | 332655 | Hemarthrosis                                    | musculoskeletal       |
| 276.4  | PRS_PC1 | 0,019  | 0,019 | 1,019 | 0,3044 | 3005  | 329850 | Acid-base balance disorder                      | endocrine/metabolic   |
| 681.3  | PRS_PC1 | 0,011  | 0,011 | 1,011 | 0,3054 | 8602  | 324253 | Cellulitis and abscess of<br>arm/hand           | dermatologic          |
| 352.2  | PRS_PC1 | -0,029 | 0,028 | 0,972 | 0,3082 | 1315  | 331540 | Facial nerve disorders [CN7]                    | neurological          |
| 610    | PRS_PC1 | -0,019 | 0,018 | 0,981 | 0,3083 | 3082  | 329773 | Benign mammary dysplasias                       | genitourinary         |
| 426.25 | PRS_PC1 | -0,068 | 0,067 | 0,934 | 0,3089 | 230   | 332625 | Other heart block                               | circulatory system    |
| 253.2  | PRS_PC1 | 0,054  | 0,053 | 1,055 | 0,3094 | 369   | 332486 | Pituitary hypofunction                          | endocrine/metabolic   |
| 334.1  | PRS_PC1 | 0,071  | 0,070 | 1,073 | 0,3096 | 214   | 332641 | Spinocerebellar disease                         | neurological          |
| 342    | PRS_PC1 | 0,019  | 0,019 | 1,020 | 0,3114 | 2867  | 329988 | Hemiplegia                                      | neurological          |

|        |         |        |       |       |        |       |        |                                               |                         |
|--------|---------|--------|-------|-------|--------|-------|--------|-----------------------------------------------|-------------------------|
| 252.1  | PRS_PC1 | -0,027 | 0,027 | 0,973 | 0,3127 | 1409  | 331446 | Hyperparathyroidism                           | endocrine/metabolic     |
| 694    | PRS_PC1 | 0,026  | 0,026 | 1,027 | 0,3136 | 1539  | 331316 | Dyschromia and Vitiligo                       | dermatologic            |
| 364.5  | PRS_PC1 | 0,046  | 0,045 | 1,047 | 0,3139 | 503   | 332352 | Corneal dystrophy                             | sense organs            |
| 276.41 | PRS_PC1 | 0,020  | 0,020 | 1,020 | 0,3140 | 2645  | 330210 | Acidosis                                      | endocrine/metabolic     |
| 661    | PRS_PC1 | 0,023  | 0,023 | 1,023 | 0,3145 | 2137  | 330718 | Fetal distress and abnormal forces of labor   | pregnancy complications |
| 459    | PRS_PC1 | 0,006  | 0,006 | 1,006 | 0,3148 | 28765 | 304090 | Other disorders of circulatory system         | circulatory system      |
| 368    | PRS_PC1 | 0,014  | 0,014 | 1,014 | 0,3159 | 5330  | 327525 | Visual disturbances                           | sense organs            |
| 275.53 | PRS_PC1 | 0,035  | 0,035 | 1,036 | 0,3164 | 851   | 332004 | Disorders of phosphorus metabolism            | endocrine/metabolic     |
| 556    | PRS_PC1 | 0,025  | 0,025 | 1,025 | 0,3172 | 1726  | 331129 | Ulceration of the lower GI tract              | digestive               |
| 1015   | PRS_PC1 | -0,015 | 0,015 | 0,985 | 0,3179 | 4477  | 328378 | Effects of other external causes              | injuries & poisonings   |
| 512.2  | PRS_PC1 | -0,056 | 0,056 | 0,945 | 0,3187 | 325   | 332530 | Painful respiration                           | respiratory             |
| 473.3  | PRS_PC1 | 0,047  | 0,048 | 1,049 | 0,3207 | 455   | 332400 | Paralysis/spasm of vocal cords or larynx      | respiratory             |
| 938    | PRS_PC1 | -0,042 | 0,042 | 0,959 | 0,3217 | 586   | 332269 | Dermatitis due to solar radiation             | dermatologic            |
| 282    | PRS_PC1 | -0,061 | 0,061 | 0,941 | 0,3221 | 275   | 332580 | Hereditary hemolytic anemias                  | hematopoietic           |
| 364    | PRS_PC1 | -0,023 | 0,023 | 0,977 | 0,3221 | 1952  | 330903 | Corneal opacity and other disorders of cornea | sense organs            |
| 427.4  | PRS_PC1 | -0,022 | 0,022 | 0,979 | 0,3223 | 2185  | 330670 | Cardiac arrest and ventricular fibrillation   | circulatory system      |
| 427.42 | PRS_PC1 | -0,023 | 0,023 | 0,977 | 0,3226 | 1891  | 330964 | Cardiac arrest                                | circulatory system      |
| 528.6  | PRS_PC1 | -0,048 | 0,048 | 0,953 | 0,3232 | 442   | 332413 | Leukoplakia of oral mucosa                    | digestive               |
| 459.9  | PRS_PC1 | 0,006  | 0,006 | 1,006 | 0,3244 | 28525 | 304330 | Circulatory disease NEC                       | circulatory system      |

|       |         |        |       |       |        |       |        |                                                      |                       |
|-------|---------|--------|-------|-------|--------|-------|--------|------------------------------------------------------|-----------------------|
|       |         |        |       |       |        |       |        | Secondary malignant                                  |                       |
| 198.7 | PRS_PC1 | 0,054  | 0,055 | 1,055 | 0,3257 | 344   | 332511 | neoplasm of skin                                     | neoplasms             |
| 041.1 | PRS_PC1 | -0,015 | 0,015 | 0,985 | 0,3266 | 4647  | 328208 | Staphylococcus infections                            | infectious diseases   |
| 526.9 | PRS_PC1 | 0,053  | 0,054 | 1,055 | 0,3274 | 352   | 332503 | Jaw disease NOS                                      | digestive             |
|       |         |        |       |       |        |       |        | Arterial embolism and thrombosis of lower extremity  |                       |
| 444.1 | PRS_PC1 | -0,034 | 0,035 | 0,966 | 0,3306 | 834   | 332021 | artery                                               | circulatory system    |
| 197   | PRS_PC1 | 0,007  | 0,007 | 1,007 | 0,3323 | 22174 | 310681 | Chemotherapy                                         | neoplasms             |
|       |         |        |       |       |        |       |        | Complication due to other                            |                       |
| 859   | PRS_PC1 | -0,014 | 0,015 | 0,986 | 0,3342 | 4885  | 327970 | implant and internal device                          | injuries & poisonings |
| 374.1 | PRS_PC1 | -0,023 | 0,024 | 0,977 | 0,3358 | 1806  | 331049 | Ectropion or entropion                               | sense organs          |
|       |         |        |       |       |        |       |        | Extrapyramidal disease and abnormal movement         |                       |
| 333   | PRS_PC1 | 0,021  | 0,022 | 1,021 | 0,3359 | 2161  | 330694 | disorders                                            | neurological          |
| 565.1 | PRS_PC1 | 0,009  | 0,010 | 1,009 | 0,3369 | 11520 | 321335 | Anal and rectal polyp                                | digestive             |
|       |         |        |       |       |        |       |        | Cancer of other female genital                       |                       |
| 184   | PRS_PC1 | 0,022  | 0,023 | 1,023 | 0,3377 | 1946  | 330909 | organs                                               | neoplasms             |
|       |         |        |       |       |        |       |        | Disorders of calcium/phosphorus                      |                       |
| 275.5 | PRS_PC1 | 0,018  | 0,018 | 1,018 | 0,3378 | 3141  | 329714 | metabolism                                           | endocrine/metabolic   |
|       |         |        |       |       |        |       |        | Disorders of optic nerve and                         |                       |
| 377   | PRS_PC1 | -0,036 | 0,038 | 0,964 | 0,3382 | 717   | 332138 | visual pathways                                      | sense organs          |
| 117   | PRS_PC1 | -0,044 | 0,046 | 0,957 | 0,3399 | 483   | 332372 | Mycoses                                              | infectious diseases   |
|       |         |        |       |       |        |       |        | Other specified nonpsychotic and/or transient mental |                       |
| 291   | PRS_PC1 | 0,030  | 0,032 | 1,030 | 0,3413 | 1043  | 331812 | disorders                                            | mental disorders      |
|       |         |        |       |       |        |       |        | Cancer of bone and connective                        |                       |
| 170   | PRS_PC1 | -0,039 | 0,041 | 0,962 | 0,3431 | 615   | 332240 | tissue                                               | neoplasms             |

|        |         |        |       |       |        |      |        |                                                                        |                         |
|--------|---------|--------|-------|-------|--------|------|--------|------------------------------------------------------------------------|-------------------------|
| 619.1  | PRS_PC1 | 0,031  | 0,033 | 1,032 | 0,3437 | 958  | 331897 | Noninflammatory disorders of ovary, fallopian tube, and broad ligament | genitourinary           |
| 227.2  | PRS_PC1 | -0,039 | 0,042 | 0,961 | 0,3449 | 601  | 332254 | Benign neoplasm of parathyroid gland                                   | neoplasms               |
| 710.12 | PRS_PC1 | -0,057 | 0,060 | 0,945 | 0,3451 | 286  | 332569 | Chronic osteomyelitis                                                  | musculoskeletal         |
| 772    | PRS_PC1 | -0,030 | 0,031 | 0,971 | 0,3458 | 1053 | 331802 | Symptoms of the muscles                                                | symptoms                |
| 686.1  | PRS_PC1 | 0,017  | 0,018 | 1,017 | 0,3462 | 3106 | 329749 | Carbuncle and furuncle                                                 | dermatologic            |
| 586.1  | PRS_PC1 | -0,049 | 0,052 | 0,952 | 0,3463 | 387  | 332468 | Anatomical abnormalities of kidney and ureters                         | genitourinary           |
| 644    | PRS_PC1 | -0,034 | 0,036 | 0,967 | 0,3465 | 823  | 332032 | Anemia during pregnancy                                                | pregnancy complications |
| 427.3  | PRS_PC1 | 0,012  | 0,013 | 1,012 | 0,3466 | 6118 | 326737 | Other specified cardiac dysrhythmias                                   | circulatory system      |
| 575.7  | PRS_PC1 | -0,020 | 0,022 | 0,980 | 0,3484 | 2186 | 330669 | Other disorders of gallbladder                                         | digestive               |
| 284    | PRS_PC1 | -0,032 | 0,034 | 0,968 | 0,3491 | 878  | 331977 | Aplastic anemia                                                        | hematopoietic           |
| 211    | PRS_PC1 | -0,010 | 0,010 | 0,990 | 0,3501 | 9767 | 323088 | Benign neoplasm of other parts of digestive system                     | neoplasms               |
| 320    | PRS_PC1 | -0,041 | 0,044 | 0,960 | 0,3511 | 544  | 332311 | Meningitis                                                             | neurological            |
| 621    | PRS_PC1 | -0,027 | 0,028 | 0,974 | 0,3512 | 1287 | 331568 | Endometrial hyperplasia                                                | genitourinary           |
| 580.2  | PRS_PC1 | -0,034 | 0,037 | 0,966 | 0,3520 | 771  | 332084 | Nephrotic syndrome without mention of glomerulonephritis               | genitourinary           |
| 508    | PRS_PC1 | -0,013 | 0,014 | 0,987 | 0,3528 | 5247 | 327608 | Pulmonary collapse; interstitial and compensatory emphysema            | respiratory             |
| 290.11 | PRS_PC1 | 0,023  | 0,025 | 1,023 | 0,3533 | 1690 | 331165 | Alzheimer's disease                                                    | mental disorders        |
| 368.3  | PRS_PC1 | 0,048  | 0,052 | 1,049 | 0,3534 | 390  | 332465 | Anisometropia                                                          | sense organs            |
| 276.5  | PRS_PC1 | 0,012  | 0,013 | 1,012 | 0,3544 | 6758 | 326097 | Hypovolemia                                                            | endocrine/metabolic     |
| 475    | PRS_PC1 | 0,016  | 0,017 | 1,016 | 0,3546 | 3421 | 329434 | Chronic sinusitis                                                      | respiratory             |



|        |         |        |       |       |        |       |        |                                 |                       |
|--------|---------|--------|-------|-------|--------|-------|--------|---------------------------------|-----------------------|
| 245.21 | PRS_PC1 | 0,054  | 0,059 | 1,056 | 0,3555 | 298   | 332557 | Chronic lymphocytic thyroiditis | endocrine/metabolic   |
|        |         |        |       |       |        |       |        | Malignant neoplasm of ovary     |                       |
| 184.1  | PRS_PC1 | 0,025  | 0,027 | 1,026 | 0,3563 | 1403  | 331452 | and other uterine adnexa        | neoplasms             |
| 596.1  | PRS_PC1 | -0,019 | 0,021 | 0,981 | 0,3566 | 2480  | 330375 | Bladder neck obstruction        | genitourinary         |
|        |         |        |       |       |        |       |        | Type 1 diabetes with            |                       |
| 250.11 | PRS_PC1 | -0,052 | 0,057 | 0,949 | 0,3575 | 319   | 332536 | ketoacidosis                    | endocrine/metabolic   |
| 686.4  | PRS_PC1 | 0,044  | 0,048 | 1,045 | 0,3583 | 454   | 332401 | Pyogenic granuloma              | dermatologic          |
| 420    | PRS_PC1 | -0,016 | 0,017 | 0,985 | 0,3587 | 3624  | 329231 | Carditis                        | circulatory system    |
| 389.2  | PRS_PC1 | -0,037 | 0,041 | 0,963 | 0,3588 | 623   | 332232 | Conductive hearing loss         | sense organs          |
| 613.9  | PRS_PC1 | -0,062 | 0,067 | 0,940 | 0,3602 | 230   | 332625 | Breast disorder NOS             | genitourinary         |
|        |         |        |       |       |        |       |        | Nonspecific abnormal findings   |                       |
|        |         |        |       |       |        |       |        | on radiological and other       |                       |
|        |         |        |       |       |        |       |        | examination of                  |                       |
| 793    | PRS_PC1 | -0,057 | 0,063 | 0,944 | 0,3627 | 263   | 332592 | musculoskeletal system          | symptoms              |
| 535.2  | PRS_PC1 | 0,037  | 0,040 | 1,037 | 0,3637 | 642   | 332213 | Atrophic gastritis              | digestive             |
|        |         |        |       |       |        |       |        | Paroxysmal supraventricular     |                       |
| 427.11 | PRS_PC1 | 0,016  | 0,017 | 1,016 | 0,3638 | 3555  | 329300 | tachycardia                     | circulatory system    |
| 788    | PRS_PC1 | 0,008  | 0,009 | 1,008 | 0,3655 | 14134 | 318721 | Syncope and collapse            | symptoms              |
|        |         |        |       |       |        |       |        | Osteoarthritis, localized,      |                       |
| 740.12 | PRS_PC1 | -0,041 | 0,046 | 0,960 | 0,3656 | 498   | 332357 | secondary                       | musculoskeletal       |
| 694.2  | PRS_PC1 | 0,027  | 0,029 | 1,027 | 0,3665 | 1196  | 331659 | Other dyschromia                | dermatologic          |
|        |         |        |       |       |        |       |        | Cyst or abscess of Bartholin's  |                       |
| 614.53 | PRS_PC1 | 0,032  | 0,036 | 1,033 | 0,3674 | 801   | 332054 | gland                           | genitourinary         |
| 561.1  | PRS_PC1 | -0,029 | 0,032 | 0,971 | 0,3679 | 990   | 331865 | Diarrhea                        | digestive             |
| 870.5  | PRS_PC1 | 0,038  | 0,042 | 1,038 | 0,3685 | 593   | 332262 | Open wound of lip and mouth     | injuries & poisonings |
| 540.11 | PRS_PC1 | 0,018  | 0,020 | 1,018 | 0,3688 | 2579  | 330276 | Acute appendicitis              | digestive             |
| 733.4  | PRS_PC1 | -0,034 | 0,037 | 0,967 | 0,3688 | 743   | 332112 | Aseptic necrosis of bone        | musculoskeletal       |
|        |         |        |       |       |        |       |        | Sinoatrial node dysfunction     |                       |
| 427.8  | PRS_PC1 | 0,031  | 0,034 | 1,031 | 0,3689 | 894   | 331961 | (Bradycardia)                   | circulatory system    |

|       |         |        |       |       |        |      |        |                                                                 |                       |
|-------|---------|--------|-------|-------|--------|------|--------|-----------------------------------------------------------------|-----------------------|
| 870.2 | PRS_PC1 | 0,057  | 0,064 | 1,058 | 0,3714 | 256  | 332599 | Open wound of ear                                               | injuries & poisonings |
| 415.2 | PRS_PC1 | -0,031 | 0,035 | 0,969 | 0,3730 | 858  | 331997 | Chronic pulmonary heart disease                                 | circulatory system    |
| 385.5 | PRS_PC1 | -0,053 | 0,060 | 0,948 | 0,3752 | 288  | 332567 | Tympanosclerosis and middle ear disease related to otitis media | sense organs          |
| 961.1 | PRS_PC1 | -0,025 | 0,028 | 0,975 | 0,3752 | 1330 | 331525 | Poisoning/allergy of sulfonamides                               | injuries & poisonings |
| 274.1 | PRS_PC1 | -0,011 | 0,013 | 0,989 | 0,3763 | 6654 | 326201 | Gout                                                            | endocrine/metabolic   |
| 504   | PRS_PC1 | -0,034 | 0,038 | 0,967 | 0,3769 | 709  | 332146 | Other alveolar and parietoalveolar pneumonopathy                | respiratory           |
| 155   | PRS_PC1 | 0,034  | 0,039 | 1,035 | 0,3782 | 697  | 332158 | Cancer of liver and intrahepatic bile duct                      | neoplasms             |
| 702.2 | PRS_PC1 | 0,013  | 0,015 | 1,013 | 0,3786 | 4678 | 328177 | Seborrheic keratosis                                            | dermatologic          |
| 797   | PRS_PC1 | -0,053 | 0,060 | 0,949 | 0,3798 | 288  | 332567 | Shock                                                           | symptoms              |
| 173   | PRS_PC1 | 0,061  | 0,070 | 1,063 | 0,3807 | 213  | 332642 | Neoplasm of uncertain behavior of skin                          | neoplasms             |
| 610.8 | PRS_PC1 | -0,031 | 0,035 | 0,970 | 0,3810 | 850  | 332005 | Other specified benign mammary dysplasias                       | genitourinary         |
| 331.1 | PRS_PC1 | 0,030  | 0,034 | 1,031 | 0,3825 | 875  | 331980 | Hydrocephalus                                                   | neurological          |
| 379.3 | PRS_PC1 | -0,013 | 0,015 | 0,987 | 0,3840 | 4868 | 327987 | Aphakia and other disorders of lens                             | sense organs          |
| 225   | PRS_PC1 | -0,025 | 0,029 | 0,975 | 0,3852 | 1241 | 331614 | Benign neoplasm of brain and other parts of nervous system      | neoplasms             |
| 618.1 | PRS_PC1 | 0,009  | 0,011 | 1,010 | 0,3861 | 9238 | 323617 | Prolapse of vaginal walls                                       | genitourinary         |
| 681.6 | PRS_PC1 | 0,010  | 0,011 | 1,010 | 0,3884 | 8566 | 324289 | Cellulitis and abscess of foot, toe                             | dermatologic          |
| 440.9 | PRS_PC1 | -0,033 | 0,038 | 0,968 | 0,3895 | 713  | 332142 | Atherosclerosis of aorta                                        | circulatory system    |

|        |         |        |       |       |        |      |        |                                                                                    |                         |
|--------|---------|--------|-------|-------|--------|------|--------|------------------------------------------------------------------------------------|-------------------------|
| 802    | PRS_PC1 | 0,024  | 0,027 | 1,024 | 0,3899 | 1386 | 331469 | Fracture of pelvis                                                                 | injuries & poisonings   |
| 378.5  | PRS_PC1 | 0,041  | 0,048 | 1,042 | 0,3903 | 455  | 332400 | Paralytic strabismus                                                               | sense organs            |
|        |         |        |       |       |        |      |        | Adverse effects of sedatives<br>or other central nervous<br>system depressants and |                         |
| 967    | PRS_PC1 | 0,031  | 0,037 | 1,032 | 0,3918 | 777  | 332078 | anesthetics                                                                        | injuries & poisonings   |
| 782.3  | PRS_PC1 | 0,014  | 0,016 | 1,014 | 0,3922 | 4058 | 328797 | Edema                                                                              | symptoms                |
|        |         |        |       |       |        |      |        | Disorders of iris and ciliary<br>body                                              | sense organs            |
| 379.5  | PRS_PC1 | 0,032  | 0,038 | 1,033 | 0,3942 | 725  | 332130 | Disorders of carbohydrate<br>transport and metabolism                              | endocrine/metabolic     |
| 271    | PRS_PC1 | 0,050  | 0,059 | 1,051 | 0,3946 | 301  | 332554 |                                                                                    |                         |
| 568    | PRS_PC1 | -0,011 | 0,013 | 0,989 | 0,3948 | 6256 | 326599 | Other disorders of peritoneum                                                      | digestive               |
| 599.1  | PRS_PC1 | -0,055 | 0,065 | 0,946 | 0,3949 | 247  | 332608 | Urinary obstruction                                                                | genitourinary           |
| 599.6  | PRS_PC1 | -0,059 | 0,069 | 0,943 | 0,3959 | 218  | 332637 | Oliguria and anuria                                                                | genitourinary           |
| 458.9  | PRS_PC1 | 0,010  | 0,012 | 1,010 | 0,3970 | 8060 | 324795 | Hypotension NOS                                                                    | circulatory system      |
|        |         |        |       |       |        |      |        | Other disorders of the kidney<br>and ureters                                       | genitourinary           |
| 586    | PRS_PC1 | -0,011 | 0,013 | 0,989 | 0,3976 | 6217 | 326638 | Cellulitis and abscess of leg,<br>except foot                                      | dermatologic            |
| 681.5  | PRS_PC1 | 0,009  | 0,011 | 1,009 | 0,3981 | 8609 | 324246 |                                                                                    |                         |
| 259    | PRS_PC1 | 0,059  | 0,070 | 1,061 | 0,3982 | 212  | 332643 | Other endocrine disorders                                                          | endocrine/metabolic     |
| 340.1  | PRS_PC1 | 0,044  | 0,052 | 1,045 | 0,3983 | 381  | 332474 | Migrain with aura                                                                  | neurological            |
|        |         |        |       |       |        |      |        | Complications of labor and<br>delivery NEC                                         | pregnancy complications |
| 669    | PRS_PC1 | 0,018  | 0,021 | 1,018 | 0,4013 | 2558 | 330297 | Malignant neoplasm of other<br>urinary organs                                      | neoplasms               |
| 189.4  | PRS_PC1 | -0,054 | 0,065 | 0,947 | 0,4015 | 248  | 332607 | Disorders of other cranial<br>nerves                                               | neurological            |
| 352    | PRS_PC1 | -0,019 | 0,022 | 0,982 | 0,4016 | 2138 | 330717 | Primary pulmonary<br>hypertension                                                  | circulatory system      |
| 415.21 | PRS_PC1 | -0,036 | 0,043 | 0,965 | 0,4031 | 561  | 332294 |                                                                                    |                         |

|        |         |        |       |       |        |       |        |                                                                     |                         |
|--------|---------|--------|-------|-------|--------|-------|--------|---------------------------------------------------------------------|-------------------------|
| 430    | PRS_PC1 | 0,016  | 0,019 | 1,016 | 0,4032 | 2879  | 329976 | Intracranial hemorrhage                                             | circulatory system      |
| 401.21 | PRS_PC1 | 0,055  | 0,066 | 1,056 | 0,4036 | 240   | 332615 | Hypertensive heart disease                                          | circulatory system      |
| 752.1  | PRS_PC1 | -0,047 | 0,056 | 0,954 | 0,4046 | 325   | 332530 | Neural tube defects                                                 | congenital anomalies    |
| 636.2  | PRS_PC1 | 0,035  | 0,042 | 1,035 | 0,4048 | 607   | 332248 | Early onset of delivery                                             | pregnancy complications |
| 523    | PRS_PC1 | 0,018  | 0,022 | 1,018 | 0,4091 | 2251  | 330604 | Gingival and periodontal diseases                                   | digestive               |
| 871    | PRS_PC1 | 0,011  | 0,013 | 1,011 | 0,4100 | 6446  | 326409 | Open wounds of extremities                                          | injuries & poisonings   |
| 158    | PRS_PC1 | 0,021  | 0,025 | 1,021 | 0,4125 | 1641  | 331214 | Neoplasm of unspecified nature of digestive system                  | neoplasms               |
| 741.2  | PRS_PC1 | 0,029  | 0,036 | 1,030 | 0,4126 | 802   | 332053 | Stiffness of joint                                                  | musculoskeletal         |
| 411.9  | PRS_PC1 | -0,017 | 0,021 | 0,983 | 0,4139 | 2471  | 330384 | Other acute and subacute forms of ischemic heart disease            | circulatory system      |
| 174    | PRS_PC1 | -0,007 | 0,008 | 0,993 | 0,4139 | 16658 | 316197 | Breast cancer                                                       | neoplasms               |
| 110.12 | PRS_PC1 | -0,058 | 0,071 | 0,944 | 0,4146 | 205   | 332650 | Althete's foot                                                      | infectious diseases     |
| 386.2  | PRS_PC1 | 0,027  | 0,033 | 1,027 | 0,4155 | 975   | 331880 | Peripheral or central vertigo                                       | sense organs            |
| 302    | PRS_PC1 | 0,038  | 0,047 | 1,039 | 0,4178 | 476   | 332379 | Sexual and gender identity disorders                                | mental disorders        |
| 614.5  | PRS_PC1 | 0,015  | 0,018 | 1,015 | 0,4205 | 3117  | 329738 | Inflammatory disease of cervix, vagina, and vulva                   | genitourinary           |
| 252.2  | PRS_PC1 | 0,045  | 0,056 | 1,046 | 0,4209 | 333   | 332522 | Hypoparathyroidism                                                  | endocrine/metabolic     |
| 809    | PRS_PC1 | -0,033 | 0,041 | 0,968 | 0,4215 | 621   | 332234 | Fracture of unspecified bones                                       | injuries & poisonings   |
| 382    | PRS_PC1 | 0,040  | 0,049 | 1,040 | 0,4225 | 423   | 332432 | Otalgia                                                             | sense organs            |
| 695    | PRS_PC1 | 0,013  | 0,017 | 1,013 | 0,4226 | 3839  | 329016 | Erythematous conditions                                             | dermatologic            |
| 575.1  | PRS_PC1 | -0,024 | 0,030 | 0,976 | 0,4231 | 1126  | 331729 | Cholangitis                                                         | digestive               |
| 513    | PRS_PC1 | -0,027 | 0,034 | 0,973 | 0,4238 | 906   | 331949 | Respiratory abnormalities                                           | respiratory             |
| 594.8  | PRS_PC1 | -0,017 | 0,022 | 0,983 | 0,4239 | 2245  | 330610 | Renal colic                                                         | genitourinary           |
| 971    | PRS_PC1 | 0,054  | 0,068 | 1,056 | 0,4244 | 223   | 332632 | Poisoning by drugs primarily affecting the autonomic nervous system | injuries & poisonings   |

|       |         |        |       |       |        |       |        |                                                         |                     |
|-------|---------|--------|-------|-------|--------|-------|--------|---------------------------------------------------------|---------------------|
| 370   | PRS_PC1 | -0,038 | 0,048 | 0,963 | 0,4260 | 453   | 332402 | Keratitis                                               | sense organs        |
| 276.6 | PRS_PC1 | -0,020 | 0,025 | 0,981 | 0,4269 | 1729  | 331126 | Fluid overload                                          | endocrine/metabolic |
| 473.4 | PRS_PC1 | 0,022  | 0,027 | 1,022 | 0,4291 | 1394  | 331461 | Voice disturbance                                       | respiratory         |
| 698   | PRS_PC1 | 0,024  | 0,030 | 1,024 | 0,4310 | 1146  | 331709 | Pruritus and related conditions                         | dermatologic        |
| 198.6 | PRS_PC1 | -0,012 | 0,016 | 0,988 | 0,4312 | 4217  | 328638 | Secondary malignancy of bone                            | neoplasms           |
| 622.1 | PRS_PC1 | -0,009 | 0,011 | 0,991 | 0,4313 | 9050  | 323805 | Polyp of corpus uteri                                   | genitourinary       |
| 728   | PRS_PC1 | -0,040 | 0,051 | 0,960 | 0,4318 | 394   | 332461 | Disorders of muscle, ligament,<br>and fascia            | musculoskeletal     |
| 614.3 | PRS_PC1 | -0,025 | 0,032 | 0,976 | 0,4324 | 1048  | 331807 | Pelvic inflammatory disease<br>(PID)                    | genitourinary       |
| 618.2 | PRS_PC1 | 0,010  | 0,013 | 1,010 | 0,4333 | 6586  | 326269 | Uterine/Uterovaginal prolapse                           | genitourinary       |
| 38    | PRS_PC1 | 0,008  | 0,010 | 1,008 | 0,4354 | 10188 | 322667 | Septicemia                                              | infectious diseases |
| 289.8 | PRS_PC1 | -0,034 | 0,044 | 0,966 | 0,4355 | 539   | 332316 | Polycythemia, secondary                                 | hematopoietic       |
| 327.3 | PRS_PC1 | -0,009 | 0,012 | 0,991 | 0,4383 | 7177  | 325678 | Sleep apnea                                             | neurological        |
| 394.7 | PRS_PC1 | 0,014  | 0,018 | 1,014 | 0,4442 | 3112  | 329743 | Disease of tricuspid valve                              | circulatory system  |
| 772.1 | PRS_PC1 | -0,055 | 0,072 | 0,947 | 0,4442 | 201   | 332654 | Muscular wasting and disuse<br>atrophy                  | symptoms            |
| 362.4 | PRS_PC1 | 0,020  | 0,026 | 1,020 | 0,4442 | 1567  | 331288 | Retinal vascular changes and<br>abnormalities           | sense organs        |
| 442   | PRS_PC1 | 0,013  | 0,017 | 1,013 | 0,4444 | 3496  | 329359 | Other aneurysm                                          | circulatory system  |
| 695.7 | PRS_PC1 | 0,023  | 0,030 | 1,023 | 0,4451 | 1196  | 331659 | Prurigo and Lichen                                      | dermatologic        |
| 568.1 | PRS_PC1 | -0,010 | 0,013 | 0,990 | 0,4475 | 5895  | 326960 | Peritoneal adhesions<br>(postoperative) (postinfection) | digestive           |
| 456   | PRS_PC1 | -0,035 | 0,047 | 0,965 | 0,4481 | 475   | 332380 | Chronic venous insufficiency<br>[CVI]                   | circulatory system  |
| 530   | PRS_PC1 | 0,004  | 0,005 | 1,004 | 0,4497 | 52939 | 279916 | Diseases of esophagus                                   | digestive           |

|        |         |        |       |       |        |       |        |                                                            |                       |
|--------|---------|--------|-------|-------|--------|-------|--------|------------------------------------------------------------|-----------------------|
| 747.11 | PRS_PC1 | 0,027  | 0,036 | 1,027 | 0,4504 | 818   | 332037 | Cardiac shunt/ heart septal defect                         | congenital anomalies  |
| 174.1  | PRS_PC1 | -0,006 | 0,008 | 0,994 | 0,4504 | 16585 | 316270 | Breast cancer [female]                                     | neoplasms             |
| 293    | PRS_PC1 | -0,016 | 0,021 | 0,984 | 0,4524 | 2304  | 330551 | Symptoms involving head and neck                           | mental disorders      |
| 291.8  | PRS_PC1 | -0,026 | 0,035 | 0,974 | 0,4530 | 860   | 331995 | Alteration of consciousness                                | mental disorders      |
| 443.9  | PRS_PC1 | 0,012  | 0,015 | 1,012 | 0,4532 | 4452  | 328403 | Peripheral vascular disease, unspecified                   | circulatory system    |
| 338.1  | PRS_PC1 | 0,033  | 0,044 | 1,033 | 0,4541 | 544   | 332311 | Acute pain                                                 | neurological          |
| 964    | PRS_PC1 | 0,035  | 0,046 | 1,035 | 0,4548 | 486   | 332369 | Poisoning by agents primarily affecting blood constituents | injuries & poisonings |
| 722.7  | PRS_PC1 | -0,031 | 0,041 | 0,970 | 0,4556 | 611   | 332244 | Intervertebral disc disorder with myelopathy               | musculoskeletal       |
| 250.22 | PRS_PC1 | -0,039 | 0,053 | 0,961 | 0,4558 | 370   | 332485 | Type 2 diabetes with renal manifestations                  | endocrine/metabolic   |
| 751.1  | PRS_PC1 | 0,026  | 0,035 | 1,026 | 0,4575 | 848   | 332007 | Congenital anomalies of genital organs                     | congenital anomalies  |
| 381.2  | PRS_PC1 | 0,046  | 0,062 | 1,047 | 0,4577 | 272   | 332583 | Eustachian tube disorders                                  | sense organs          |
| 242.1  | PRS_PC1 | -0,029 | 0,040 | 0,971 | 0,4590 | 661   | 332194 | Graves' disease                                            | endocrine/metabolic   |
| 381    | PRS_PC1 | 0,014  | 0,019 | 1,014 | 0,4618 | 2754  | 330101 | Otitis media and Eustachian tube disorders                 | sense organs          |
| 245.2  | PRS_PC1 | 0,042  | 0,057 | 1,043 | 0,4619 | 315   | 332540 | Chronic thyroiditis                                        | endocrine/metabolic   |
| 416    | PRS_PC1 | -0,010 | 0,013 | 0,990 | 0,4622 | 6069  | 326786 | Cardiomegaly                                               | circulatory system    |
| 513.3  | PRS_PC1 | -0,053 | 0,072 | 0,949 | 0,4623 | 202   | 332653 | Hypoventilation                                            | respiratory           |
| 250.42 | PRS_PC1 | -0,030 | 0,041 | 0,971 | 0,4657 | 622   | 332233 | Other abnormal glucose                                     | endocrine/metabolic   |
| 378.2  | PRS_PC1 | -0,037 | 0,051 | 0,963 | 0,4696 | 391   | 332464 | Nystagmus and other irregular eye movements                | sense organs          |
| 743.9  | PRS_PC1 | -0,021 | 0,030 | 0,979 | 0,4703 | 1180  | 331675 | Osteopenia or other disorder of bone and cartilage         | musculoskeletal       |

|        |         |        |       |       |        |      |        |                                                                  |                       |
|--------|---------|--------|-------|-------|--------|------|--------|------------------------------------------------------------------|-----------------------|
| 721.8  | PRS_PC1 | 0,026  | 0,036 | 1,026 | 0,4716 | 794  | 332061 | Other allied disorders of spine                                  | musculoskeletal       |
| 535.1  | PRS_PC1 | 0,018  | 0,025 | 1,018 | 0,4736 | 1688 | 331167 | Acute gastritis                                                  | digestive             |
|        |         |        |       |       |        |      |        | Strabismus and other disorders of binocular eye movements        | sense organs          |
| 378    | PRS_PC1 | 0,016  | 0,022 | 1,016 | 0,4738 | 2079 | 330776 | Inflammatory bowel disease and other gastroenteritis and colitis | digestive             |
| 555    | PRS_PC1 | 0,010  | 0,014 | 1,010 | 0,4738 | 5720 | 327135 | Other disorders of eyelids                                       | sense organs          |
| 374    | PRS_PC1 | -0,008 | 0,012 | 0,992 | 0,4753 | 7918 | 324937 | Balanoposthitis                                                  | genitourinary         |
| 601.4  | PRS_PC1 | 0,035  | 0,049 | 1,036 | 0,4757 | 423  | 332432 | Other specified disorders of breast                              | genitourinary         |
| 613.8  | PRS_PC1 | 0,035  | 0,049 | 1,035 | 0,4761 | 436  | 332419 | Effects radiation NOS                                            | injuries & poisonings |
| 990    | PRS_PC1 | -0,008 | 0,012 | 0,992 | 0,4764 | 8022 | 324833 | Other and unspecified disorders of the nervous system            | neurological          |
| 349    | PRS_PC1 | -0,028 | 0,039 | 0,973 | 0,4769 | 688  | 332167 | Scar conditions and fibrosis of skin                             | dermatologic          |
| 701.2  | PRS_PC1 | -0,013 | 0,018 | 0,987 | 0,4772 | 3058 | 329797 | Systemic sclerosis                                               | dermatologic          |
| 709.3  | PRS_PC1 | -0,045 | 0,063 | 0,956 | 0,4804 | 258  | 332597 | Diseases and other conditions of the tongue                      | digestive             |
| 529    | PRS_PC1 | -0,017 | 0,024 | 0,983 | 0,4814 | 1827 | 331028 | Fever of unknown origin                                          | symptoms              |
| 783    | PRS_PC1 | 0,009  | 0,013 | 1,009 | 0,4824 | 6128 | 326727 | Paroxysmal ventricular tachycardia                               | circulatory system    |
| 427.12 | PRS_PC1 | -0,018 | 0,026 | 0,982 | 0,4827 | 1574 | 331281 | Contracture of joint                                             | musculoskeletal       |
| 739    | PRS_PC1 | -0,026 | 0,037 | 0,974 | 0,4828 | 747  | 332108 | Nerve root and plexus disorders                                  | neurological          |
| 353    | PRS_PC1 | -0,016 | 0,022 | 0,984 | 0,4846 | 2066 | 330789 | Vitamin D deficiency                                             | endocrine/metabolic   |
| 261.4  | PRS_PC1 | 0,014  | 0,020 | 1,014 | 0,4850 | 2578 | 330277 |                                                                  |                       |

|        |         |        |       |       |        |       |        |                                                                                      |                         |
|--------|---------|--------|-------|-------|--------|-------|--------|--------------------------------------------------------------------------------------|-------------------------|
| 790    | PRS_PC1 | 0,035  | 0,050 | 1,036 | 0,4871 | 411   | 332444 | Nonspecific findings on examination of blood                                         | symptoms                |
| 560.1  | PRS_PC1 | -0,021 | 0,031 | 0,979 | 0,4876 | 1094  | 331761 | Paralytic ileus                                                                      | digestive               |
| 458    | PRS_PC1 | 0,006  | 0,009 | 1,006 | 0,4882 | 13068 | 319787 | Hypotension                                                                          | circulatory system      |
| 526.41 | PRS_PC1 | 0,039  | 0,056 | 1,040 | 0,4889 | 330   | 332525 | Temporomandibular joint disorder, unspecified                                        | digestive               |
| 709.2  | PRS_PC1 | 0,024  | 0,035 | 1,025 | 0,4900 | 836   | 332019 | Sicca syndrome                                                                       | dermatologic            |
| 287.31 | PRS_PC1 | -0,028 | 0,040 | 0,973 | 0,4921 | 637   | 332218 | Primary thrombocytopenia                                                             | hematopoietic           |
| 451.2  | PRS_PC1 | 0,010  | 0,014 | 1,010 | 0,4930 | 5333  | 327522 | Phlebitis and thrombophlebitis of lower extremities                                  | circulatory system      |
| 613.1  | PRS_PC1 | -0,024 | 0,035 | 0,976 | 0,4940 | 856   | 331999 | Inflammatory disease of breast                                                       | genitourinary           |
| 338.2  | PRS_PC1 | 0,027  | 0,040 | 1,027 | 0,4941 | 660   | 332195 | Chronic pain                                                                         | neurological            |
| 573    | PRS_PC1 | 0,012  | 0,018 | 1,012 | 0,4963 | 3226  | 329629 | Other disorders of liver                                                             | digestive               |
| 681.1  | PRS_PC1 | 0,024  | 0,035 | 1,024 | 0,4996 | 850   | 332005 | Cellulitis and abscess of fingers/toes                                               | dermatologic            |
| 575.9  | PRS_PC1 | -0,028 | 0,041 | 0,972 | 0,4998 | 604   | 332251 | Nonspecific abnormal findings on radiological and other examination of biliary tract | digestive               |
| 654.2  | PRS_PC1 | -0,040 | 0,059 | 0,961 | 0,5003 | 300   | 332555 | Rhesus isoimmunization in pregnancy                                                  | pregnancy complications |
| 642    | PRS_PC1 | -0,021 | 0,031 | 0,980 | 0,5015 | 1146  | 331709 | Hypertension complicating pregnancy, childbirth, and the puerperium                  | pregnancy complications |
| 195    | PRS_PC1 | 0,004  | 0,006 | 1,004 | 0,5023 | 28548 | 304307 | Cancer, suspected or other                                                           | neoplasms               |
| 386.1  | PRS_PC1 | -0,022 | 0,033 | 0,978 | 0,5029 | 941   | 331914 | Meniere's disease                                                                    | sense organs            |
| 443.1  | PRS_PC1 | 0,015  | 0,022 | 1,015 | 0,5053 | 2151  | 330704 | Raynaud's syndrome                                                                   | circulatory system      |
| 610.4  | PRS_PC1 | -0,017 | 0,026 | 0,983 | 0,5064 | 1593  | 331262 | Benign neoplasm of breast                                                            | genitourinary           |



|        |         |        |       |       |        |       |        |                                             |                       |
|--------|---------|--------|-------|-------|--------|-------|--------|---------------------------------------------|-----------------------|
|        |         |        |       |       |        |       |        | Nonrheumatic tricuspid valve disorders      | circulatory system    |
| 395.3  | PRS_PC1 | 0,037  | 0,056 | 1,038 | 0,5067 | 325   | 332530 |                                             |                       |
| 270.33 | PRS_PC1 | 0,040  | 0,060 | 1,041 | 0,5069 | 286   | 332569 | Amyloidosis                                 | endocrine/metabolic   |
| 513.8  | PRS_PC1 | -0,039 | 0,059 | 0,962 | 0,5078 | 296   | 332559 | Disorders of diaphragm                      | respiratory           |
|        |         |        |       |       |        |       |        | Noninflammatory disorders of vagina         | genitourinary         |
| 619.4  | PRS_PC1 | 0,015  | 0,023 | 1,015 | 0,5095 | 2054  | 330801 |                                             |                       |
|        |         |        |       |       |        |       |        | Congenital anomalies of male genital organs | congenital anomalies  |
| 751.12 | PRS_PC1 | 0,041  | 0,062 | 1,042 | 0,5098 | 268   | 332587 |                                             |                       |
| 420.3  | PRS_PC1 | -0,019 | 0,028 | 0,982 | 0,5116 | 1299  | 331556 | Endocarditis                                | circulatory system    |
| 340    | PRS_PC1 | -0,009 | 0,014 | 0,991 | 0,5119 | 5075  | 327780 | Migraine                                    | neurological          |
| 735.21 | PRS_PC1 | -0,013 | 0,020 | 0,987 | 0,5134 | 2666  | 330189 | Hammer toe (acquired)                       | musculoskeletal       |
|        |         |        |       |       |        |       |        | Redundant prepuce and phimosis/BXO          | genitourinary         |
| 604.1  | PRS_PC1 | -0,011 | 0,017 | 0,989 | 0,5152 | 3533  | 329322 |                                             |                       |
|        |         |        |       |       |        |       |        | Cancer of larynx, pharynx, nasal cavities   | neoplasms             |
| 149    | PRS_PC1 | 0,022  | 0,034 | 1,022 | 0,5153 | 914   | 331941 |                                             |                       |
| 458.2  | PRS_PC1 | 0,031  | 0,047 | 1,031 | 0,5158 | 463   | 332392 | Iatrogenic hypotension                      | circulatory system    |
|        |         |        |       |       |        |       |        | Unspecified disorder of lipid metabolism    | endocrine/metabolic   |
| 272.9  | PRS_PC1 | 0,027  | 0,042 | 1,028 | 0,5160 | 581   | 332274 |                                             |                       |
| 560.2  | PRS_PC1 | 0,029  | 0,044 | 1,029 | 0,5175 | 527   | 332328 | Impaction of intestine                      | digestive             |
| 428.2  | PRS_PC1 | -0,007 | 0,011 | 0,993 | 0,5192 | 8922  | 323933 | Heart failure NOS                           | circulatory system    |
| 695.2  | PRS_PC1 | -0,041 | 0,064 | 0,960 | 0,5195 | 252   | 332603 | Bullous dermatoses                          | dermatologic          |
| 701.4  | PRS_PC1 | 0,040  | 0,062 | 1,040 | 0,5203 | 273   | 332582 | Keloid scar                                 | dermatologic          |
|        |         |        |       |       |        |       |        | Disorders of parathyroid gland              | endocrine/metabolic   |
| 252    | PRS_PC1 | -0,016 | 0,026 | 0,984 | 0,5203 | 1597  | 331258 |                                             |                       |
| 367.2  | PRS_PC1 | 0,015  | 0,023 | 1,015 | 0,5204 | 2007  | 330848 | Astigmatism                                 | sense organs          |
| 364.9  | PRS_PC1 | 0,046  | 0,072 | 1,047 | 0,5211 | 201   | 332654 | Cornea replaced by transplant               | sense organs          |
| 627.1  | PRS_PC1 | 0,007  | 0,010 | 1,007 | 0,5212 | 10253 | 322602 | Postmenopausal bleeding                     | genitourinary         |
| 420.21 | PRS_PC1 | -0,039 | 0,061 | 0,961 | 0,5213 | 274   | 332581 | Acute pericarditis                          | circulatory system    |
|        |         |        |       |       |        |       |        | Adverse reaction to serum or vaccine        | injuries & poisonings |
| 941    | PRS_PC1 | -0,031 | 0,049 | 0,969 | 0,5215 | 434   | 332421 |                                             |                       |

|        |         |        |       |       |        |       |        |                                 |                       |
|--------|---------|--------|-------|-------|--------|-------|--------|---------------------------------|-----------------------|
| 527    | PRS_PC1 | 0,021  | 0,032 | 1,021 | 0,5232 | 983   | 331872 | Diseases of the salivary glands | digestive             |
| 256    | PRS_PC1 | -0,036 | 0,057 | 0,964 | 0,5238 | 320   | 332535 | Ovarian dysfunction             | endocrine/metabolic   |
|        |         |        |       |       |        |       |        | Benign neoplasm of kidney       |                       |
| 223    | PRS_PC1 | -0,039 | 0,062 | 0,961 | 0,5250 | 270   | 332585 | and other urinary organs        | neoplasms             |
| 246    | PRS_PC1 | -0,025 | 0,040 | 0,975 | 0,5256 | 660   | 332195 | Other disorders of thyroid      | endocrine/metabolic   |
| 586.11 | PRS_PC1 | -0,035 | 0,055 | 0,966 | 0,5264 | 345   | 332510 | Small kidney                    | genitourinary         |
|        |         |        |       |       |        |       |        | Benign neoplasm of lip, oral    |                       |
| 210    | PRS_PC1 | 0,018  | 0,029 | 1,018 | 0,5276 | 1241  | 331614 | cavity, and pharynx             | neoplasms             |
| 735    | PRS_PC1 | -0,006 | 0,009 | 0,994 | 0,5278 | 12322 | 320533 | Acquired foot deformities       | musculoskeletal       |
| 916    | PRS_PC1 | 0,012  | 0,020 | 1,012 | 0,5302 | 2702  | 330153 | Contusion                       | injuries & poisonings |
|        |         |        |       |       |        |       |        | Pulmonary congestion and        |                       |
| 503    | PRS_PC1 | 0,024  | 0,038 | 1,024 | 0,5313 | 727   | 332128 | hypostasis                      | respiratory           |
| 260.6  | PRS_PC1 | -0,016 | 0,026 | 0,984 | 0,5323 | 1600  | 331255 | Anorexia                        | endocrine/metabolic   |
| 187.2  | PRS_PC1 | 0,036  | 0,058 | 1,037 | 0,5344 | 310   | 332545 | Malignant neoplasm of testis    | neoplasms             |
|        |         |        |       |       |        |       |        | Other benign neoplasm of        |                       |
|        |         |        |       |       |        |       |        | connective and other soft       |                       |
| 215    | PRS_PC1 | -0,017 | 0,027 | 0,983 | 0,5345 | 1423  | 331432 | tissue                          | neoplasms             |
| 800.1  | PRS_PC1 | 0,011  | 0,017 | 1,011 | 0,5350 | 3506  | 329349 | Fracture of neck of femur       | injuries & poisonings |
|        |         |        |       |       |        |       |        | Nephritis; nephrosis; renal     |                       |
| 580    | PRS_PC1 | 0,015  | 0,023 | 1,015 | 0,5358 | 1893  | 330962 | sclerosis                       | genitourinary         |
|        |         |        |       |       |        |       |        | Degeneration of intervertebral  |                       |
| 722.6  | PRS_PC1 | -0,009 | 0,015 | 0,991 | 0,5365 | 4747  | 328108 | disc                            | musculoskeletal       |
|        |         |        |       |       |        |       |        | Anticoagulants causing          |                       |
| 964.1  | PRS_PC1 | 0,029  | 0,047 | 1,029 | 0,5382 | 470   | 332385 | adverse effects                 | injuries & poisonings |
|        |         |        |       |       |        |       |        | Acute posthemorrhagic           |                       |
| 285.1  | PRS_PC1 | 0,034  | 0,055 | 1,034 | 0,5390 | 348   | 332507 | anemia                          | hematopoietic         |
| 1000   | PRS_PC1 | -0,023 | 0,038 | 0,977 | 0,5402 | 728   | 332127 | Burns                           | injuries & poisonings |
|        |         |        |       |       |        |       |        | Other demyelinating diseases    |                       |
| 341    | PRS_PC1 | 0,036  | 0,059 | 1,037 | 0,5429 | 293   | 332562 | of central nervous system       | neurological          |

|        |         |        |       |       |        |       |        |                                                                          |                         |
|--------|---------|--------|-------|-------|--------|-------|--------|--------------------------------------------------------------------------|-------------------------|
| 81     | PRS_PC1 | -0,014 | 0,024 | 0,986 | 0,5440 | 1877  | 330978 | Infection/inflammation of internal prosthetic device; implant; and graft | infectious diseases     |
| 605    | PRS_PC1 | 0,022  | 0,037 | 1,023 | 0,5445 | 754   | 332101 | Erectile dysfunction [ED]                                                | genitourinary           |
| 337    | PRS_PC1 | 0,031  | 0,051 | 1,032 | 0,5447 | 393   | 332462 | Disorders of the autonomic nervous system                                | neurological            |
| 367.8  | PRS_PC1 | 0,026  | 0,043 | 1,026 | 0,5462 | 569   | 332286 | Hypermetropia                                                            | sense organs            |
| 430.1  | PRS_PC1 | -0,019 | 0,031 | 0,981 | 0,5465 | 1059  | 331796 | Subarachnoid hemorrhage                                                  | circulatory system      |
| 472    | PRS_PC1 | 0,017  | 0,028 | 1,017 | 0,5495 | 1342  | 331513 | Chronic pharyngitis and nasopharyngitis                                  | respiratory             |
| 751.11 | PRS_PC1 | 0,026  | 0,044 | 1,027 | 0,5497 | 531   | 332324 | Congenital anomalies of female genital organs                            | congenital anomalies    |
| 573.5  | PRS_PC1 | -0,017 | 0,028 | 0,984 | 0,5503 | 1351  | 331504 | Jaundice (not of newborn)                                                | digestive               |
| 840.3  | PRS_PC1 | -0,037 | 0,063 | 0,963 | 0,5514 | 265   | 332590 | Joint/ligament sprain                                                    | injuries & poisonings   |
| 172    | PRS_PC1 | -0,004 | 0,007 | 0,996 | 0,5527 | 22183 | 310672 | Skin cancer                                                              | neoplasms               |
| 585.1  | PRS_PC1 | -0,005 | 0,009 | 0,995 | 0,5528 | 13464 | 319391 | Acute renal failure                                                      | genitourinary           |
| 647.1  | PRS_PC1 | -0,037 | 0,062 | 0,964 | 0,5555 | 273   | 332582 | Infections of genitourinary tract during pregnancy                       | pregnancy complications |
| 585.2  | PRS_PC1 | -0,014 | 0,023 | 0,986 | 0,5558 | 1908  | 330947 | Renal failure NOS                                                        | genitourinary           |
| 172.1  | PRS_PC1 | -0,009 | 0,016 | 0,991 | 0,5565 | 4178  | 328677 | Melanomas of skin, dx or hx                                              | neoplasms               |
| 172.11 | PRS_PC1 | -0,009 | 0,016 | 0,991 | 0,5565 | 4178  | 328677 | Melanomas of skin                                                        | neoplasms               |
| 721.1  | PRS_PC1 | 0,006  | 0,011 | 1,006 | 0,5576 | 9419  | 323436 | Spondylosis without myelopathy                                           | musculoskeletal         |
| 850    | PRS_PC1 | -0,007 | 0,012 | 0,993 | 0,5580 | 7626  | 325229 | Hemorrhage or hematoma complicating a procedure                          | injuries & poisonings   |
| 509.8  | PRS_PC1 | 0,018  | 0,031 | 1,018 | 0,5587 | 1068  | 331787 | Dependence on respirator [Ventilator] or supplemental oxygen             | respiratory             |
| 427.2  | PRS_PC1 | 0,005  | 0,008 | 1,005 | 0,5612 | 18370 | 314485 | Atrial fibrillation and flutter                                          | circulatory system      |
| 202.21 | PRS_PC1 | 0,027  | 0,046 | 1,027 | 0,5618 | 493   | 332362 | Nodular lymphoma                                                         | neoplasms               |

|        |         |        |       |       |        |       |        |                                                                                                        |                         |
|--------|---------|--------|-------|-------|--------|-------|--------|--------------------------------------------------------------------------------------------------------|-------------------------|
|        |         |        |       |       |        |       |        | Secondary malignant                                                                                    |                         |
| 198    | PRS_PC1 | 0,005  | 0,008 | 1,005 | 0,5621 | 15963 | 316892 | neoplasm                                                                                               | neoplasms               |
| 8      | PRS_PC1 | 0,008  | 0,013 | 1,008 | 0,5649 | 5791  | 327064 | Intestinal infection                                                                                   | infectious diseases     |
| 771.1  | PRS_PC1 | 0,007  | 0,012 | 1,007 | 0,5664 | 7508  | 325347 | Swelling of limb                                                                                       | symptoms                |
| 358    | PRS_PC1 | 0,033  | 0,057 | 1,033 | 0,5665 | 314   | 332541 | Myoneural disorders                                                                                    | neurological            |
| 610.2  | PRS_PC1 | -0,031 | 0,054 | 0,969 | 0,5688 | 350   | 332505 | Fibroadenosis of breast                                                                                | genitourinary           |
| 592    | PRS_PC1 | 0,009  | 0,016 | 1,009 | 0,5694 | 4167  | 328688 | Cystitis and urethritis                                                                                | genitourinary           |
|        |         |        |       |       |        |       |        | Abnormality of organs and soft tissues of pelvis complicating pregnancy, childbirth, or the puerperium |                         |
| 654.1  | PRS_PC1 | -0,017 | 0,031 | 0,983 | 0,5720 | 1157  | 331698 | childbirth, or the puerperium                                                                          | pregnancy complications |
| 369.2  | PRS_PC1 | 0,038  | 0,068 | 1,039 | 0,5740 | 227   | 332628 | Eye infection, viral                                                                                   | sense organs            |
|        |         |        |       |       |        |       |        | Other and unspecified                                                                                  |                         |
| 286.7  | PRS_PC1 | -0,025 | 0,044 | 0,975 | 0,5745 | 531   | 332324 | coagulation defects                                                                                    | hematopoietic           |
| 070.4  | PRS_PC1 | 0,029  | 0,051 | 1,029 | 0,5772 | 393   | 332462 | Chronic hepatitis                                                                                      | infectious diseases     |
|        |         |        |       |       |        |       |        | Valvular heart disease/ heart chambers                                                                 |                         |
| 747.12 | PRS_PC1 | -0,027 | 0,048 | 0,974 | 0,5792 | 450   | 332405 | chambers                                                                                               | congenital anomalies    |
| 274.11 | PRS_PC1 | -0,039 | 0,070 | 0,962 | 0,5799 | 213   | 332642 | Gouty arthropathy                                                                                      | endocrine/metabolic     |
| 306.9  | PRS_PC1 | 0,025  | 0,046 | 1,026 | 0,5802 | 488   | 332367 | Tension headache                                                                                       | mental disorders        |
|        |         |        |       |       |        |       |        | Decreased white blood cell count                                                                       |                         |
| 288.1  | PRS_PC1 | -0,008 | 0,014 | 0,992 | 0,5805 | 5145  | 327710 | count                                                                                                  | hematopoietic           |
| 288.11 | PRS_PC1 | -0,008 | 0,014 | 0,992 | 0,5805 | 5145  | 327710 | Neutropenia                                                                                            | hematopoietic           |
| 800    | PRS_PC1 | 0,006  | 0,010 | 1,006 | 0,5806 | 10397 | 322458 | Fracture of lower limb                                                                                 | injuries & poisonings   |
|        |         |        |       |       |        |       |        | Other congenital anomalies of lower limb, including pelvic girdle                                      |                         |
| 755.6  | PRS_PC1 | 0,037  | 0,066 | 1,037 | 0,5806 | 234   | 332621 | girdle                                                                                                 | congenital anomalies    |
| 153.2  | PRS_PC1 | 0,008  | 0,015 | 1,008 | 0,5810 | 4641  | 328214 | Colon cancer                                                                                           | neoplasms               |
|        |         |        |       |       |        |       |        | Other disorders of arteries and arterioles                                                             |                         |
| 447    | PRS_PC1 | -0,012 | 0,022 | 0,988 | 0,5829 | 2064  | 330791 | and arterioles                                                                                         | circulatory system      |

|        |         |        |       |       |        |       |        |                                                               |                       |
|--------|---------|--------|-------|-------|--------|-------|--------|---------------------------------------------------------------|-----------------------|
|        |         |        |       |       |        |       |        | Other hypertrophic                                            |                       |
| 425.12 | PRS_PC1 | -0,032 | 0,059 | 0,968 | 0,5842 | 300   | 332555 | cardiomyopathy                                                | circulatory system    |
| 626.2  | PRS_PC1 | -0,013 | 0,024 | 0,987 | 0,5844 | 1804  | 331051 | Dysmenorrhea                                                  | genitourinary         |
| 752.11 | PRS_PC1 | -0,034 | 0,062 | 0,967 | 0,5848 | 272   | 332583 | Spina bifida                                                  | congenital anomalies  |
|        |         |        |       |       |        |       |        | Musculoskeletal symptoms                                      |                       |
| 771    | PRS_PC1 | -0,017 | 0,031 | 0,983 | 0,5855 | 1087  | 331768 | referable to limbs                                            | symptoms              |
| 287.1  | PRS_PC1 | 0,037  | 0,069 | 1,038 | 0,5867 | 219   | 332636 | Spontaneous ecchymoses                                        | hematopoietic         |
| 720    | PRS_PC1 | -0,007 | 0,012 | 0,993 | 0,5877 | 6913  | 325942 | Spinal stenosis                                               | musculoskeletal       |
| 506    | PRS_PC1 | 0,013  | 0,023 | 1,013 | 0,5878 | 1893  | 330962 | Empyema and pneumothorax                                      | respiratory           |
| 577.1  | PRS_PC1 | 0,014  | 0,026 | 1,014 | 0,5898 | 1490  | 331365 | Acute pancreatitis                                            | digestive             |
|        |         |        |       |       |        |       |        | Chorioretinal inflammations,<br>scars, and other disorders of |                       |
| 363    | PRS_PC1 | -0,028 | 0,053 | 0,972 | 0,5933 | 374   | 332481 | choroid                                                       | sense organs          |
| 008.6  | PRS_PC1 | -0,014 | 0,026 | 0,986 | 0,5935 | 1487  | 331368 | Viral Enteritis                                               | infectious diseases   |
| 195.1  | PRS_PC1 | 0,003  | 0,006 | 1,003 | 0,5945 | 27677 | 305178 | Malignant neoplasm, other                                     | neoplasms             |
| 803.1  | PRS_PC1 | 0,011  | 0,020 | 1,011 | 0,5948 | 2518  | 330337 | Fracture of humerus                                           | injuries & poisonings |
| 471    | PRS_PC1 | 0,009  | 0,017 | 1,009 | 0,5952 | 3836  | 329019 | Nasal polyps                                                  | respiratory           |
| 358.1  | PRS_PC1 | 0,032  | 0,062 | 1,033 | 0,5981 | 273   | 332582 | Myasthenia gravis                                             | neurological          |
|        |         |        |       |       |        |       |        | Primary angle-closure                                         |                       |
| 365.2  | PRS_PC1 | -0,015 | 0,029 | 0,985 | 0,5988 | 1243  | 331612 | glaucoma                                                      | sense organs          |
|        |         |        |       |       |        |       |        | Vaginal enterocele, congenital                                |                       |
| 618.6  | PRS_PC1 | -0,018 | 0,035 | 0,982 | 0,5993 | 873   | 331982 | or acquired                                                   | genitourinary         |
| 189.2  | PRS_PC1 | -0,009 | 0,017 | 0,991 | 0,6000 | 3541  | 329314 | Cancer of bladder                                             | neoplasms             |
| 555.2  | PRS_PC1 | 0,008  | 0,016 | 1,008 | 0,6008 | 4067  | 328788 | Ulcerative colitis                                            | digestive             |
|        |         |        |       |       |        |       |        | Aneurysm of artery of lower                                   |                       |
| 442.3  | PRS_PC1 | -0,031 | 0,060 | 0,969 | 0,6029 | 284   | 332571 | extremity                                                     | circulatory system    |
|        |         |        |       |       |        |       |        | Pneumonia due to fungus                                       |                       |
| 480.3  | PRS_PC1 | -0,035 | 0,068 | 0,966 | 0,6059 | 225   | 332630 | (mycoses)                                                     | respiratory           |
| 411.2  | PRS_PC1 | -0,004 | 0,008 | 0,996 | 0,6063 | 17878 | 314977 | Myocardial infarction                                         | circulatory system    |
| 381.1  | PRS_PC1 | 0,011  | 0,022 | 1,011 | 0,6066 | 2212  | 330643 | Otitis media                                                  | sense organs          |

|        |         |        |       |       |        |       |        |                                        |                     |
|--------|---------|--------|-------|-------|--------|-------|--------|----------------------------------------|---------------------|
|        |         |        |       |       |        |       |        | Thyrototoxicosis with or without       |                     |
| 242    | PRS_PC1 | -0,010 | 0,019 | 0,990 | 0,6073 | 2883  | 329972 | goiter                                 | endocrine/metabolic |
| 241.2  | PRS_PC1 | 0,017  | 0,033 | 1,017 | 0,6081 | 944   | 331911 | Nontoxic multinodular goiter           | endocrine/metabolic |
|        |         |        |       |       |        |       |        | Other non-epithelial cancer of         |                     |
| 172.2  | PRS_PC1 | -0,004 | 0,008 | 0,996 | 0,6116 | 18336 | 314519 | skin                                   | neoplasms           |
| 700    | PRS_PC1 | -0,025 | 0,049 | 0,976 | 0,6120 | 436   | 332419 | Corns and callosities                  | dermatologic        |
| 687    | PRS_PC1 | 0,017  | 0,035 | 1,018 | 0,6126 | 872   | 331983 | Symptoms affecting skin                | dermatologic        |
| 531.4  | PRS_PC1 | 0,021  | 0,042 | 1,021 | 0,6133 | 594   | 332261 | Peptic ulcer, site unspecified         | digestive           |
| 527.2  | PRS_PC1 | 0,023  | 0,045 | 1,023 | 0,6149 | 512   | 332343 | Sialoadenitis                          | digestive           |
| 348.4  | PRS_PC1 | 0,035  | 0,070 | 1,036 | 0,6149 | 211   | 332644 | Cerebral cysts                         | neurological        |
| 622    | PRS_PC1 | -0,005 | 0,010 | 0,995 | 0,6175 | 12191 | 320664 | Polyp of female genital organs         | genitourinary       |
| 710.19 | PRS_PC1 | -0,019 | 0,038 | 0,982 | 0,6199 | 732   | 332123 | Unspecified osteomyelitis              | musculoskeletal     |
| 041.4  | PRS_PC1 | -0,007 | 0,014 | 0,993 | 0,6215 | 5241  | 327614 | E. coli                                | infectious diseases |
|        |         |        |       |       |        |       |        | Disorders involving the                |                     |
| 279    | PRS_PC1 | 0,024  | 0,048 | 1,024 | 0,6218 | 441   | 332414 | immune mechanism                       | endocrine/metabolic |
| 193    | PRS_PC1 | -0,023 | 0,046 | 0,978 | 0,6219 | 494   | 332361 | Thyroid cancer                         | neoplasms           |
|        |         |        |       |       |        |       |        | Bronchopneumonia and lung              |                     |
| 480.5  | PRS_PC1 | -0,019 | 0,039 | 0,981 | 0,6234 | 670   | 332185 | abscess                                | respiratory         |
| 626.13 | PRS_PC1 | 0,011  | 0,023 | 1,011 | 0,6236 | 2035  | 330820 | Irregular menstrual cycle              | genitourinary       |
|        |         |        |       |       |        |       |        | Malignant neoplasm of                  |                     |
| 189.21 | PRS_PC1 | -0,009 | 0,018 | 0,991 | 0,6239 | 3184  | 329671 | bladder                                | neoplasms           |
|        |         |        |       |       |        |       |        | Cancer of other female genital         |                     |
| 184.2  | PRS_PC1 | -0,025 | 0,051 | 0,976 | 0,6257 | 406   | 332449 | organs (excluding uterus and<br>ovary) | neoplasms           |
|        |         |        |       |       |        |       |        | Pain, swelling or discharge of         |                     |
| 379.9  | PRS_PC1 | -0,030 | 0,062 | 0,971 | 0,6277 | 273   | 332582 | eye                                    | sense organs        |
|        |         |        |       |       |        |       |        | Inflammatory diseases of               |                     |
| 614.4  | PRS_PC1 | 0,028  | 0,057 | 1,028 | 0,6280 | 314   | 332541 | uterus, except cervix                  | genitourinary       |
| 696.42 | PRS_PC1 | 0,015  | 0,031 | 1,015 | 0,6305 | 1074  | 331781 | Psoriatic arthropathy                  | dermatologic        |

|        |         |        |       |       |        |       |        |                                                     |                         |
|--------|---------|--------|-------|-------|--------|-------|--------|-----------------------------------------------------|-------------------------|
| 573.9  | PRS_PC1 | 0,025  | 0,052 | 1,025 | 0,6310 | 378   | 332477 | Abnormal serum enzyme levels                        | digestive               |
| 592.1  | PRS_PC1 | 0,008  | 0,016 | 1,008 | 0,6310 | 4003  | 328852 | Cystitis                                            | genitourinary           |
| 218.2  | PRS_PC1 | -0,024 | 0,051 | 0,976 | 0,6326 | 406   | 332449 | Other benign neoplasm of uterus                     | neoplasms               |
| 537    | PRS_PC1 | 0,007  | 0,014 | 1,007 | 0,6350 | 5421  | 327434 | Other disorders of stomach and duodenum             | digestive               |
| 368.9  | PRS_PC1 | 0,015  | 0,031 | 1,015 | 0,6364 | 1074  | 331781 | Subjective visual disturbances                      | sense organs            |
| 255.1  | PRS_PC1 | -0,030 | 0,063 | 0,971 | 0,6367 | 258   | 332597 | Adrenal hyperfunction                               | endocrine/metabolic     |
| 198.2  | PRS_PC1 | -0,007 | 0,016 | 0,993 | 0,6371 | 4344  | 328511 | Secondary malignancy of respiratory organs          | neoplasms               |
| 041.2  | PRS_PC1 | 0,009  | 0,019 | 1,009 | 0,6383 | 2804  | 330051 | Streptococcus infection                             | infectious diseases     |
| 220    | PRS_PC1 | 0,011  | 0,024 | 1,011 | 0,6395 | 1841  | 331014 | Benign neoplasm of ovary                            | neoplasms               |
| 226    | PRS_PC1 | 0,025  | 0,055 | 1,025 | 0,6483 | 348   | 332507 | Benign neoplasm of thyroid glands                   | neoplasms               |
| 225.1  | PRS_PC1 | -0,014 | 0,030 | 0,987 | 0,6501 | 1163  | 331692 | Benign neoplasm of brain, cranial nerves, meninges  | neoplasms               |
| 357    | PRS_PC1 | 0,009  | 0,019 | 1,009 | 0,6506 | 2870  | 329985 | Inflammatory and toxic neuropathy                   | neurological            |
| 656    | PRS_PC1 | 0,020  | 0,045 | 1,020 | 0,6526 | 521   | 332334 | Other perinatal conditions of fetus or newborn      | pregnancy complications |
| 283    | PRS_PC1 | 0,031  | 0,069 | 1,031 | 0,6539 | 219   | 332636 | Acquired hemolytic anemias                          | hematopoietic           |
| 695.3  | PRS_PC1 | 0,019  | 0,043 | 1,019 | 0,6548 | 561   | 332294 | Rosacea                                             | dermatologic            |
| 585.31 | PRS_PC1 | -0,016 | 0,036 | 0,984 | 0,6555 | 781   | 332074 | Renal dialysis                                      | genitourinary           |
| 571.8  | PRS_PC1 | -0,011 | 0,025 | 0,989 | 0,6562 | 1732  | 331123 | Liver abscess and sequelae of chronic liver disease | digestive               |
| 618.5  | PRS_PC1 | 0,018  | 0,041 | 1,018 | 0,6580 | 613   | 332242 | Prolapse of vaginal vault after hysterectomy        | genitourinary           |
| 626.12 | PRS_PC1 | -0,005 | 0,011 | 0,995 | 0,6589 | 10115 | 322740 | Excessive or frequent menstruation                  | genitourinary           |

|        |         |        |       |       |        |       |        |                                |                         |
|--------|---------|--------|-------|-------|--------|-------|--------|--------------------------------|-------------------------|
|        |         |        |       |       |        |       |        | Upper gastrointestinal         |                         |
| 750.1  | PRS_PC1 | 0,019  | 0,042 | 1,019 | 0,6598 | 583   | 332272 | congenital anomalies           | congenital anomalies    |
| 202.24 | PRS_PC1 | -0,015 | 0,033 | 0,985 | 0,6606 | 937   | 331918 | Large cell lymphoma            | neoplasms               |
| 348.7  | PRS_PC1 | -0,019 | 0,043 | 0,981 | 0,6621 | 568   | 332287 | Coma                           | neurological            |
| 218.1  | PRS_PC1 | -0,004 | 0,010 | 0,996 | 0,6635 | 11570 | 321285 | Uterine leiomyoma              | neoplasms               |
| 175    | PRS_PC1 | -0,007 | 0,016 | 0,993 | 0,6658 | 4038  | 328817 | Acquired absence of breast     | neoplasms               |
| 145.2  | PRS_PC1 | -0,021 | 0,049 | 0,979 | 0,6667 | 433   | 332422 | Cancer of tongue               | neoplasms               |
| 626.14 | PRS_PC1 | 0,007  | 0,016 | 1,007 | 0,6681 | 3928  | 328927 | Irregular menstrual bleeding   | genitourinary           |
|        |         |        |       |       |        |       |        | Other congenital               |                         |
| 756    | PRS_PC1 | 0,014  | 0,033 | 1,014 | 0,6684 | 938   | 331917 | musculoskeletal anomalies      | congenital anomalies    |
| 642.1  | PRS_PC1 | -0,025 | 0,058 | 0,975 | 0,6685 | 307   | 332548 | Preeclampsia and eclampsia     | pregnancy complications |
| 650    | PRS_PC1 | 0,010  | 0,024 | 1,010 | 0,6685 | 1921  | 330934 | Normal delivery                | pregnancy complications |
| 80     | PRS_PC1 | 0,006  | 0,013 | 1,006 | 0,6694 | 6049  | 326806 | Postoperative infection        | infectious diseases     |
| 1001   | PRS_PC1 | 0,011  | 0,025 | 1,011 | 0,6695 | 1651  | 331204 | Foreign body injury            | injuries & poisonings   |
| 481    | PRS_PC1 | -0,012 | 0,028 | 0,988 | 0,6695 | 1339  | 331516 | Influenza                      | respiratory             |
|        |         |        |       |       |        |       |        | Chronic glomerulonephritis,    |                         |
| 580.14 | PRS_PC1 | 0,015  | 0,035 | 1,015 | 0,6696 | 845   | 332010 | NOS                            | genitourinary           |
|        |         |        |       |       |        |       |        | Cerebral degeneration,         |                         |
| 331.9  | PRS_PC1 | 0,013  | 0,031 | 1,013 | 0,6698 | 1059  | 331796 | unspecified                    | neurological            |
| 443    | PRS_PC1 | 0,005  | 0,012 | 1,005 | 0,6700 | 6870  | 325985 | Peripheral vascular disease    | circulatory system      |
| 615    | PRS_PC1 | 0,007  | 0,016 | 1,007 | 0,6704 | 4425  | 328430 | Endometriosis                  | genitourinary           |
| 478    | PRS_PC1 | 0,020  | 0,046 | 1,020 | 0,6724 | 487   | 332368 | Throat pain                    | respiratory             |
|        |         |        |       |       |        |       |        | Hyperosmolality and/or         |                         |
| 276.11 | PRS_PC1 | 0,015  | 0,036 | 1,015 | 0,6738 | 803   | 332052 | hypernatremia                  | endocrine/metabolic     |
| 602    | PRS_PC1 | -0,010 | 0,024 | 0,990 | 0,6746 | 1823  | 331032 | Other disorders of prostate    | genitourinary           |
| 695.4  | PRS_PC1 | -0,017 | 0,042 | 0,983 | 0,6765 | 590   | 332265 | Lupus (localized and systemic) | dermatologic            |
|        |         |        |       |       |        |       |        | Complication of colostomy or   |                         |
| 853    | PRS_PC1 | 0,015  | 0,036 | 1,015 | 0,6771 | 812   | 332043 | enterostomy                    | injuries & poisonings   |
| 531.2  | PRS_PC1 | 0,005  | 0,013 | 1,005 | 0,6779 | 6077  | 326778 | Gastric ulcer                  | digestive               |



|        |         |        |       |       |        |       |        |                                                                  |                    |
|--------|---------|--------|-------|-------|--------|-------|--------|------------------------------------------------------------------|--------------------|
| 736    | PRS_PC1 | -0,008 | 0,019 | 0,992 | 0,6793 | 2944  | 329911 | Other acquired deformities of limbs                              | musculoskeletal    |
| 617    | PRS_PC1 | -0,022 | 0,052 | 0,979 | 0,6795 | 381   | 332474 | Disorders secondary to childbirth, surgery, trauma               | genitourinary      |
| 227    | PRS_PC1 | 0,011  | 0,027 | 1,011 | 0,6864 | 1421  | 331434 | Benign neoplasm of other endocrine glands and related structures | neoplasms          |
| 218    | PRS_PC1 | -0,004 | 0,010 | 0,996 | 0,6874 | 11871 | 320984 | Benign neoplasm of uterus                                        | neoplasms          |
| 526.4  | PRS_PC1 | 0,022  | 0,055 | 1,022 | 0,6890 | 337   | 332518 | Temporomandibular joint disorders                                | digestive          |
| 365.11 | PRS_PC1 | -0,009 | 0,022 | 0,991 | 0,6891 | 2233  | 330622 | Primary open angle glaucoma                                      | sense organs       |
| 454.11 | PRS_PC1 | -0,012 | 0,029 | 0,988 | 0,6891 | 1235  | 331620 | Varicose veins of lower extremity, symptomatic                   | circulatory system |
| 791    | PRS_PC1 | 0,012  | 0,030 | 1,012 | 0,6900 | 1153  | 331702 | Gangrene                                                         | symptoms           |
| 728.2  | PRS_PC1 | -0,016 | 0,040 | 0,984 | 0,6937 | 649   | 332206 | Laxity of ligament or hypermobility syndrome                     | musculoskeletal    |
| 365.1  | PRS_PC1 | -0,008 | 0,022 | 0,992 | 0,6984 | 2239  | 330616 | Open-angle glaucoma                                              | sense organs       |
| 528.5  | PRS_PC1 | 0,013  | 0,033 | 1,013 | 0,6990 | 955   | 331900 | Diseases of lips                                                 | digestive          |
| 159.2  | PRS_PC1 | 0,023  | 0,059 | 1,023 | 0,6990 | 298   | 332557 | Malignant neoplasm of small intestine, including duodenum        | neoplasms          |
| 191.1  | PRS_PC1 | 0,014  | 0,035 | 1,014 | 0,6996 | 830   | 332025 | Cancer of brain and nervous system                               | neoplasms          |
| 385    | PRS_PC1 | -0,012 | 0,031 | 0,988 | 0,7004 | 1046  | 331809 | Other disorders of middle ear and mastoid                        | sense organs       |
| 707.1  | PRS_PC1 | -0,022 | 0,059 | 0,978 | 0,7013 | 303   | 332552 | Decubitus ulcer                                                  | dermatologic       |
| 395.4  | PRS_PC1 | 0,020  | 0,053 | 1,021 | 0,7036 | 364   | 332491 | Nonrheumatic pulmonary valve disorders                           | circulatory system |
| 613.7  | PRS_PC1 | 0,014  | 0,036 | 1,014 | 0,7045 | 789   | 332066 | Other signs and symptoms in breast                               | genitourinary      |

|       |         |        |       |       |        |       |        |                                                              |                         |
|-------|---------|--------|-------|-------|--------|-------|--------|--------------------------------------------------------------|-------------------------|
|       |         |        |       |       |        |       |        | Placenta previa and abruptio                                 |                         |
| 635.3 | PRS_PC1 | -0,011 | 0,029 | 0,989 | 0,7078 | 1271  | 331584 | placenta                                                     | pregnancy complications |
| 151   | PRS_PC1 | -0,012 | 0,033 | 0,988 | 0,7085 | 943   | 331912 | Cancer of stomach                                            | neoplasms               |
| 521.1 | PRS_PC1 | -0,006 | 0,016 | 0,994 | 0,7092 | 4233  | 328622 | Dental caries                                                | digestive               |
| 150   | PRS_PC1 | -0,011 | 0,029 | 0,989 | 0,7094 | 1270  | 331585 | Cancer of esophagus                                          | neoplasms               |
| 394   | PRS_PC1 | 0,004  | 0,010 | 1,004 | 0,7099 | 10773 | 322082 | Rheumatic disease of the heart valves                        | circulatory system      |
| 695.8 | PRS_PC1 | -0,020 | 0,054 | 0,980 | 0,7114 | 353   | 332502 | Other specified erythematous conditions                      | dermatologic            |
| 240   | PRS_PC1 | 0,013  | 0,036 | 1,013 | 0,7127 | 807   | 332048 | Simple and unspecified goiter                                | endocrine/metabolic     |
| 389.3 | PRS_PC1 | -0,023 | 0,062 | 0,978 | 0,7150 | 271   | 332584 | Degenerative and vascular disorders of ear                   | sense organs            |
| 818   | PRS_PC1 | 0,010  | 0,029 | 1,011 | 0,7161 | 1257  | 331598 | Intracranial hemorrhage (injury)                             | injuries & poisonings   |
| 573.7 | PRS_PC1 | -0,005 | 0,013 | 0,995 | 0,7166 | 6319  | 326536 | Abnormal results of function study of liver                  | digestive               |
| 228   | PRS_PC1 | -0,008 | 0,022 | 0,992 | 0,7167 | 2224  | 330631 | Hemangioma and lymphangioma, any site                        | neoplasms               |
| 870.4 | PRS_PC1 | 0,018  | 0,051 | 1,019 | 0,7167 | 401   | 332454 | Open wound of nose and sinus                                 | injuries & poisonings   |
| 646   | PRS_PC1 | 0,008  | 0,022 | 1,008 | 0,7186 | 2261  | 330594 | Other complications of pregnancy NEC                         | pregnancy complications |
| 710.1 | PRS_PC1 | -0,012 | 0,033 | 0,988 | 0,7213 | 948   | 331907 | Osteomyelitis                                                | musculoskeletal         |
| 286.1 | PRS_PC1 | -0,015 | 0,042 | 0,985 | 0,7216 | 602   | 332253 | Congenital coagulation defects                               | hematopoietic           |
| 191   | PRS_PC1 | 0,011  | 0,032 | 1,011 | 0,7241 | 1033  | 331822 | Manlignant and unknown neoplasms of brain and nervous system | neoplasms               |
| 764   | PRS_PC1 | -0,006 | 0,016 | 0,994 | 0,7245 | 4082  | 328773 | Sciatica                                                     | symptoms                |
| 430.3 | PRS_PC1 | 0,016  | 0,045 | 1,016 | 0,7246 | 503   | 332352 | Subdural hemorrhage                                          | circulatory system      |

|        |         |        |       |       |        |       |        |                                                                                       |                         |
|--------|---------|--------|-------|-------|--------|-------|--------|---------------------------------------------------------------------------------------|-------------------------|
| 907    | PRS_PC1 | -0,008 | 0,023 | 0,992 | 0,7248 | 1906  | 330949 | Injuries to the nervous system                                                        | injuries & poisonings   |
| 571.51 | PRS_PC1 | -0,010 | 0,029 | 0,990 | 0,7287 | 1275  | 331580 | Cirrhosis of liver without<br>mention of alcohol                                      | digestive               |
| 663    | PRS_PC1 | 0,015  | 0,042 | 1,015 | 0,7290 | 606   | 332249 | Umbilical cord complications<br>during labor and delivery                             | pregnancy complications |
| 741.3  | PRS_PC1 | -0,016 | 0,046 | 0,984 | 0,7311 | 502   | 332353 | Difficulty in walking                                                                 | musculoskeletal         |
| 536    | PRS_PC1 | -0,021 | 0,062 | 0,979 | 0,7320 | 272   | 332583 | Disorders of function of<br>stomach                                                   | digestive               |
| 521    | PRS_PC1 | -0,005 | 0,016 | 0,995 | 0,7331 | 4292  | 328563 | Diseases of hard tissues of<br>teeth                                                  | digestive               |
| 362.3  | PRS_PC1 | 0,021  | 0,063 | 1,021 | 0,7360 | 264   | 332591 | Other nondiabetic retinopathy                                                         | sense organs            |
| 204.21 | PRS_PC1 | 0,015  | 0,044 | 1,015 | 0,7369 | 525   | 332330 | Myeloid leukemia, acute                                                               | neoplasms               |
| 426    | PRS_PC1 | -0,003 | 0,009 | 0,997 | 0,7383 | 14258 | 318597 | Cardiac conduction disorders                                                          | circulatory system      |
| 381.9  | PRS_PC1 | -0,019 | 0,056 | 0,982 | 0,7408 | 329   | 332526 | Otorrhea                                                                              | sense organs            |
| 428    | PRS_PC1 | -0,003 | 0,010 | 0,997 | 0,7409 | 11289 | 321566 | Congestive heart failure;<br>nonhypertensive                                          | circulatory system      |
| 571.6  | PRS_PC1 | 0,017  | 0,053 | 1,018 | 0,7416 | 374   | 332481 | Primary biliary cirrhosis                                                             | digestive               |
| 857    | PRS_PC1 | 0,007  | 0,021 | 1,007 | 0,7435 | 2288  | 330567 | Mechanical complication of<br>unspecified genitourinary<br>device, implant, and graft | injuries & poisonings   |
| 198.3  | PRS_PC1 | 0,006  | 0,019 | 1,006 | 0,7440 | 2935  | 329920 | Secondary malignant<br>neoplasm of digestive<br>systems                               | neoplasms               |
| 801.1  | PRS_PC1 | -0,021 | 0,064 | 0,980 | 0,7474 | 254   | 332601 | Fracture of foot                                                                      | injuries & poisonings   |
| 773    | PRS_PC1 | 0,003  | 0,011 | 1,003 | 0,7495 | 9241  | 323614 | Pain in limb                                                                          | musculoskeletal         |
| 281.11 | PRS_PC1 | 0,009  | 0,030 | 1,010 | 0,7498 | 1179  | 331676 | Pernicious anemia                                                                     | hematopoietic           |
| 418.1  | PRS_PC1 | 0,004  | 0,013 | 1,004 | 0,7505 | 6030  | 326825 | Precordial pain                                                                       | circulatory system      |
| 634.3  | PRS_PC1 | 0,018  | 0,056 | 1,018 | 0,7524 | 328   | 332527 | Ectopic pregnancy                                                                     | pregnancy complications |

|        |         |        |       |       |        |       |        |                               |                       |
|--------|---------|--------|-------|-------|--------|-------|--------|-------------------------------|-----------------------|
|        |         |        |       |       |        |       |        | Other vitamin B12 deficiency  |                       |
| 281.12 | PRS_PC1 | 0,019  | 0,059 | 1,019 | 0,7541 | 296   | 332559 | anemia                        | hematopoietic         |
| 426.3  | PRS_PC1 | -0,004 | 0,012 | 0,996 | 0,7541 | 7450  | 325405 | Bundle branch block           | circulatory system    |
|        |         |        |       |       |        |       |        | Nonrheumatic mitral valve     |                       |
| 395.1  | PRS_PC1 | 0,004  | 0,013 | 1,004 | 0,7574 | 6150  | 326705 | disorders                     | circulatory system    |
|        |         |        |       |       |        |       |        | Osteitis deformans [Paget's   |                       |
| 731.1  | PRS_PC1 | -0,018 | 0,058 | 0,982 | 0,7581 | 310   | 332545 | disease of bone]              | musculoskeletal       |
| 755    | PRS_PC1 | -0,012 | 0,040 | 0,988 | 0,7584 | 643   | 332212 | Congenital anomalies of limbs | congenital anomalies  |
|        |         |        |       |       |        |       |        | Rupture of tendon,            |                       |
| 727.6  | PRS_PC1 | -0,014 | 0,045 | 0,986 | 0,7603 | 502   | 332353 | nontraumatic                  | musculoskeletal       |
| 801    | PRS_PC1 | -0,006 | 0,020 | 0,994 | 0,7604 | 2701  | 330154 | Fracture of ankle and foot    | injuries & poisonings |
|        |         |        |       |       |        |       |        | Cancer of kidney and renal    |                       |
| 189.1  | PRS_PC1 | -0,008 | 0,025 | 0,992 | 0,7612 | 1694  | 331161 | pelvis                        | neoplasms             |
|        |         |        |       |       |        |       |        | Fracture of vertebral column  |                       |
|        |         |        |       |       |        |       |        | without mention of spinal     |                       |
| 805    | PRS_PC1 | 0,006  | 0,019 | 1,006 | 0,7614 | 2889  | 329966 | cord injury                   | injuries & poisonings |
|        |         |        |       |       |        |       |        | Irregular menstrual           |                       |
| 626.1  | PRS_PC1 | -0,003 | 0,009 | 0,997 | 0,7618 | 16287 | 316568 | cycle/bleeding                | genitourinary         |
| 740.2  | PRS_PC1 | 0,011  | 0,036 | 1,011 | 0,7621 | 804   | 332051 | Osteoarthritis, generalized   | musculoskeletal       |
| 286    | PRS_PC1 | -0,009 | 0,029 | 0,991 | 0,7644 | 1255  | 331600 | Coagulation defects           | hematopoietic         |
| 202.2  | PRS_PC1 | -0,006 | 0,020 | 0,994 | 0,7654 | 2643  | 330212 | Non-Hodgkins lymphoma         | neoplasms             |
| 134    | PRS_PC1 | 0,021  | 0,071 | 1,021 | 0,7661 | 208   | 332647 | Helminthiasis                 | infectious diseases   |
|        |         |        |       |       |        |       |        | Nephritis and nephropathy     |                       |
|        |         |        |       |       |        |       |        | without mention of            |                       |
| 580.3  | PRS_PC1 | 0,016  | 0,054 | 1,016 | 0,7665 | 357   | 332498 | glomerulonephritis            | genitourinary         |
|        |         |        |       |       |        |       |        | Nephritis and nephropathy     |                       |
| 580.32 | PRS_PC1 | 0,016  | 0,054 | 1,016 | 0,7665 | 357   | 332498 | with pathological lesion      | genitourinary         |
| 737.1  | PRS_PC1 | 0,014  | 0,047 | 1,014 | 0,7670 | 470   | 332385 | Kyphosis (acquired)           | musculoskeletal       |
| 367.9  | PRS_PC1 | 0,009  | 0,029 | 1,009 | 0,7696 | 1203  | 331652 | Blindness and low vision      | sense organs          |

|        |         |        |       |       |        |       |        |                                 |                       |
|--------|---------|--------|-------|-------|--------|-------|--------|---------------------------------|-----------------------|
|        |         |        |       |       |        |       |        | Disorders of tooth              |                       |
| 520    | PRS_PC1 | 0,006  | 0,020 | 1,006 | 0,7700 | 2710  | 330145 | development                     | digestive             |
| 433.5  | PRS_PC1 | -0,012 | 0,042 | 0,988 | 0,7718 | 578   | 332277 | Cerebral aneurysm               | circulatory system    |
| 281.13 | PRS_PC1 | 0,014  | 0,049 | 1,014 | 0,7721 | 434   | 332421 | Folate-deficiency anemia        | hematopoietic         |
|        |         |        |       |       |        |       |        | Other and unspecified           |                       |
| 759    | PRS_PC1 | -0,017 | 0,060 | 0,983 | 0,7730 | 292   | 332563 | congenital anomalies            | congenital anomalies  |
|        |         |        |       |       |        |       |        | Cardiac and circulatory         |                       |
| 747    | PRS_PC1 | 0,004  | 0,014 | 1,004 | 0,7778 | 5095  | 327760 | congenital anomalies            | congenital anomalies  |
|        |         |        |       |       |        |       |        | Osteitis deformans and          |                       |
|        |         |        |       |       |        |       |        | osteopathies associated with    |                       |
|        |         |        |       |       |        |       |        | other disorders classified      |                       |
| 731    | PRS_PC1 | -0,016 | 0,056 | 0,984 | 0,7788 | 329   | 332526 | elsewhere                       | musculoskeletal       |
|        |         |        |       |       |        |       |        | Disorders of refraction and     |                       |
|        |         |        |       |       |        |       |        | accommodation; blindness        |                       |
| 367    | PRS_PC1 | 0,004  | 0,013 | 1,004 | 0,7804 | 6360  | 326495 | and low vision                  | sense organs          |
| 741.4  | PRS_PC1 | 0,006  | 0,021 | 1,006 | 0,7810 | 2267  | 330588 | Joint effusions                 | musculoskeletal       |
| 474    | PRS_PC1 | -0,006 | 0,021 | 0,994 | 0,7830 | 2298  | 330557 | Acute and chronic tonsillitis   | respiratory           |
| 803.3  | PRS_PC1 | 0,006  | 0,020 | 1,006 | 0,7839 | 2531  | 330324 | Fracture of clavicle or scapula | injuries & poisonings |
|        |         |        |       |       |        |       |        | Nervous system congenital       |                       |
| 752    | PRS_PC1 | -0,013 | 0,049 | 0,987 | 0,7839 | 435   | 332420 | anomalies                       | congenital anomalies  |
|        |         |        |       |       |        |       |        | Cyst and pseudocyst of          |                       |
| 577.3  | PRS_PC1 | 0,011  | 0,038 | 1,011 | 0,7843 | 703   | 332152 | pancreas                        | digestive             |
| 557.1  | PRS_PC1 | -0,005 | 0,020 | 0,995 | 0,7850 | 2572  | 330283 | Celiac disease                  | digestive             |
| 1100   | PRS_PC1 | 0,004  | 0,016 | 1,004 | 0,7853 | 4363  | 328492 | Family history                  |                       |
| 930    | PRS_PC1 | 0,018  | 0,068 | 1,019 | 0,7857 | 226   | 332629 | Allergic reaction to food       | injuries & poisonings |
| 365    | PRS_PC1 | -0,003 | 0,011 | 0,997 | 0,7863 | 8933  | 323922 | Glaucoma                        | sense organs          |
| 216    | PRS_PC1 | 0,003  | 0,010 | 1,003 | 0,7889 | 10839 | 322016 | Benign neoplasm of skin         | neoplasms             |
| 804    | PRS_PC1 | 0,004  | 0,015 | 1,004 | 0,7895 | 4481  | 328374 | Fracture of hand or wrist       | injuries & poisonings |
| 172.3  | PRS_PC1 | -0,007 | 0,028 | 0,993 | 0,7896 | 1331  | 331524 | Carcinoma in situ of skin       | neoplasms             |
| 836    | PRS_PC1 | 0,010  | 0,037 | 1,010 | 0,7904 | 738   | 332117 | Traumatic arthropathy           | injuries & poisonings |

|        |         |        |       |       |        |      |        |                                                      |                       |
|--------|---------|--------|-------|-------|--------|------|--------|------------------------------------------------------|-----------------------|
|        |         |        |       |       |        |      |        | Disorders of magnesium                               |                       |
| 275.3  | PRS_PC1 | 0,007  | 0,026 | 1,007 | 0,7906 | 1540 | 331315 | metabolism                                           | endocrine/metabolic   |
| 1006   | PRS_PC1 | 0,016  | 0,062 | 1,016 | 0,7921 | 269  | 332586 | Crushing injury                                      | injuries & poisonings |
| 79     | PRS_PC1 | 0,004  | 0,016 | 1,004 | 0,7922 | 4188 | 328667 | Viral infection                                      | infectious diseases   |
|        |         |        |       |       |        |      |        | Malignant neoplasm of gallbladder and extrahepatic   |                       |
| 159.3  | PRS_PC1 | 0,014  | 0,053 | 1,014 | 0,7971 | 365  | 332490 | bile ducts                                           | neoplasms             |
| 550.5  | PRS_PC1 | 0,004  | 0,015 | 1,004 | 0,7988 | 4500 | 328355 | Ventral hernia                                       | digestive             |
|        |         |        |       |       |        |      |        | Malignant neoplasm of retroperitoneum and            |                       |
| 159.4  | PRS_PC1 | 0,015  | 0,057 | 1,015 | 0,7996 | 319  | 332536 | peritoneum                                           | neoplasms             |
| 697    | PRS_PC1 | 0,009  | 0,036 | 1,009 | 0,8005 | 805  | 332050 | Sarcoidosis                                          | dermatologic          |
| 170.2  | PRS_PC1 | 0,012  | 0,048 | 1,012 | 0,8008 | 453  | 332402 | Cancer of connective tissue                          | neoplasms             |
| 442.1  | PRS_PC1 | 0,005  | 0,019 | 1,005 | 0,8021 | 2803 | 330052 | Aortic aneurysm                                      | circulatory system    |
| 279.1  | PRS_PC1 | 0,013  | 0,053 | 1,013 | 0,8057 | 363  | 332492 | Immunity deficiency                                  | endocrine/metabolic   |
| 256.4  | PRS_PC1 | -0,015 | 0,061 | 0,985 | 0,8060 | 280  | 332575 | Polycystic ovaries                                   | endocrine/metabolic   |
| 368.1  | PRS_PC1 | 0,007  | 0,030 | 1,007 | 0,8105 | 1159 | 331696 | Amblyopia                                            | sense organs          |
|        |         |        |       |       |        |      |        | Vascular hamartomas and non-                         |                       |
| 217    | PRS_PC1 | 0,008  | 0,034 | 1,008 | 0,8119 | 912  | 331943 | neoplastic nevi                                      | neoplasms             |
| 947    | PRS_PC1 | 0,008  | 0,034 | 1,008 | 0,8125 | 902  | 331953 | Urticaria                                            | dermatologic          |
| 217.1  | PRS_PC1 | 0,008  | 0,035 | 1,008 | 0,8127 | 856  | 331999 | Nevus, non-neoplastic                                | neoplasms             |
| 803.2  | PRS_PC1 | -0,003 | 0,012 | 0,997 | 0,8151 | 7254 | 325601 | Fracture of radius and ulna                          | injuries & poisonings |
| 385.3  | PRS_PC1 | 0,009  | 0,038 | 1,009 | 0,8182 | 704  | 332151 | Cholesteatoma                                        | sense organs          |
| 426.32 | PRS_PC1 | -0,004 | 0,017 | 0,996 | 0,8186 | 3835 | 329020 | Left bundle branch block                             | circulatory system    |
|        |         |        |       |       |        |      |        | Diseases of the oral soft tissues, excluding lesions |                       |
| 528    | PRS_PC1 | 0,003  | 0,014 | 1,003 | 0,8199 | 5525 | 327330 | specific for gingiva and tongue                      | digestive             |
| 78     | PRS_PC1 | -0,006 | 0,028 | 0,994 | 0,8212 | 1317 | 331538 | Viral warts & HPV                                    | infectious diseases   |
| 260    | PRS_PC1 | 0,011  | 0,051 | 1,012 | 0,8214 | 401  | 332454 | Protein-calorie malnutrition                         | endocrine/metabolic   |

|        |         |        |       |       |        |       |        |                                                                |                         |
|--------|---------|--------|-------|-------|--------|-------|--------|----------------------------------------------------------------|-------------------------|
| 502    | PRS_PC1 | 0,005  | 0,023 | 1,005 | 0,8235 | 2001  | 330854 | Postinflammatory pulmonary fibrosis                            | respiratory             |
| 185    | PRS_PC1 | -0,002 | 0,011 | 0,998 | 0,8249 | 9974  | 322881 | Cancer of prostate                                             | neoplasms               |
| 733    | PRS_PC1 | -0,003 | 0,015 | 0,997 | 0,8263 | 4488  | 328367 | Other disorders of bone and cartilage                          | musculoskeletal         |
| 257.1  | PRS_PC1 | 0,014  | 0,064 | 1,014 | 0,8279 | 255   | 332600 | Testicular hypofunction                                        | endocrine/metabolic     |
| 635.2  | PRS_PC1 | 0,008  | 0,035 | 1,008 | 0,8287 | 864   | 331991 | Antepartum hemorrhage, abruptio placentae, and placenta previa | pregnancy complications |
| 530.11 | PRS_PC1 | -0,001 | 0,006 | 0,999 | 0,8303 | 28775 | 304080 | GERD                                                           | digestive               |
| 747.2  | PRS_PC1 | 0,014  | 0,067 | 1,014 | 0,8311 | 228   | 332627 | Congenital anomalies of peripheral vascular system             | congenital anomalies    |
| 335    | PRS_PC1 | 0,005  | 0,025 | 1,005 | 0,8319 | 1625  | 331230 | Multiple sclerosis                                             | neurological            |
| 426.31 | PRS_PC1 | -0,004 | 0,017 | 0,996 | 0,8326 | 3592  | 329263 | Right bundle branch block                                      | circulatory system      |
| 592.12 | PRS_PC1 | -0,006 | 0,029 | 0,994 | 0,8328 | 1204  | 331651 | Chronic cystitis                                               | genitourinary           |
| 653    | PRS_PC1 | 0,006  | 0,027 | 1,006 | 0,8331 | 1481  | 331374 | Problems associated with amniotic cavity and membranes         | pregnancy complications |
| 724    | PRS_PC1 | 0,006  | 0,028 | 1,006 | 0,8336 | 1346  | 331509 | Other and unspecified disorders of back                        | musculoskeletal         |
| 596.5  | PRS_PC1 | 0,005  | 0,024 | 1,005 | 0,8340 | 1846  | 331009 | Functional disorders of bladder                                | genitourinary           |
| 381.3  | PRS_PC1 | 0,015  | 0,070 | 1,015 | 0,8340 | 211   | 332644 | Mastoiditis & related conditions                               | sense organs            |
| 277.5  | PRS_PC1 | -0,010 | 0,048 | 0,990 | 0,8359 | 451   | 332404 | Other disorders of lipid metabolism                            | endocrine/metabolic     |
| 257    | PRS_PC1 | 0,013  | 0,062 | 1,013 | 0,8375 | 266   | 332589 | Testicular dysfunction                                         | endocrine/metabolic     |
| 701    | PRS_PC1 | 0,003  | 0,013 | 1,003 | 0,8392 | 6363  | 326492 | Other hypertrophic and atrophic conditions of skin             | dermatologic            |

|        |         |        |       |       |        |       |        |                                                                                 |                         |
|--------|---------|--------|-------|-------|--------|-------|--------|---------------------------------------------------------------------------------|-------------------------|
| 359    | PRS_PC1 | -0,008 | 0,039 | 0,992 | 0,8405 | 674   | 332181 | Muscular dystrophies and other myopathies                                       | neurological            |
| 626    | PRS_PC1 | 0,002  | 0,008 | 1,002 | 0,8410 | 19150 | 313705 | Disorders of menstruation and other abnormal bleeding from female genital tract | genitourinary           |
| 519.9  | PRS_PC1 | 0,010  | 0,050 | 1,010 | 0,8433 | 417   | 332438 | Symptoms involving respiratory system and other chest symptoms                  | respiratory             |
| 442.11 | PRS_PC1 | 0,005  | 0,024 | 1,005 | 0,8440 | 1818  | 331037 | Abdominal aortic aneurysm                                                       | circulatory system      |
| 379.2  | PRS_PC1 | -0,004 | 0,020 | 0,996 | 0,8444 | 2603  | 330252 | Disorders of vitreous body                                                      | sense organs            |
| 613    | PRS_PC1 | 0,004  | 0,021 | 1,004 | 0,8451 | 2343  | 330512 | Other nonmalignant breast conditions                                            | genitourinary           |
| 577.2  | PRS_PC1 | -0,007 | 0,037 | 0,993 | 0,8453 | 744   | 332111 | Chronic pancreatitis                                                            | digestive               |
| 702    | PRS_PC1 | -0,002 | 0,011 | 0,998 | 0,8455 | 8991  | 323864 | Degenerative skin conditions and other dermatoses                               | dermatologic            |
| 614.32 | PRS_PC1 | -0,009 | 0,047 | 0,991 | 0,8467 | 466   | 332389 | Chronic inflammatory pelvic disease                                             | genitourinary           |
| 272.13 | PRS_PC1 | 0,012  | 0,062 | 1,012 | 0,8509 | 273   | 332582 | Mixed hyperlipidemia                                                            | endocrine/metabolic     |
| 352.1  | PRS_PC1 | -0,007 | 0,037 | 0,993 | 0,8509 | 763   | 332092 | Trigeminal nerve disorders [CN5]                                                | neurological            |
| 635    | PRS_PC1 | -0,004 | 0,024 | 0,996 | 0,8515 | 1999  | 330856 | Hemorrhage during pregnancy; childbirth and postpartum                          | pregnancy complications |
| 379    | PRS_PC1 | -0,002 | 0,011 | 0,998 | 0,8519 | 8332  | 324523 | Other disorders of eye                                                          | sense organs            |
| 191.11 | PRS_PC1 | 0,007  | 0,037 | 1,007 | 0,8523 | 769   | 332086 | Cancer of brain                                                                 | neoplasms               |
| 427.41 | PRS_PC1 | -0,008 | 0,042 | 0,992 | 0,8542 | 591   | 332264 | Ventricular fibrillation and flutter                                            | circulatory system      |
| 250.21 | PRS_PC1 | -0,012 | 0,067 | 0,988 | 0,8548 | 232   | 332623 | Type 2 diabetes with ketoacidosis                                               | endocrine/metabolic     |
| 651    | PRS_PC1 | 0,010  | 0,055 | 1,010 | 0,8554 | 342   | 332513 | Multiple gestation                                                              | pregnancy complications |



|        |         |        |       |       |        |       |        |                                                     |                         |
|--------|---------|--------|-------|-------|--------|-------|--------|-----------------------------------------------------|-------------------------|
| 745    | PRS_PC1 | -0,002 | 0,009 | 0,998 | 0,8562 | 12064 | 320791 | Pain in joint                                       | musculoskeletal         |
| 285    | PRS_PC1 | 0,001  | 0,007 | 1,001 | 0,8565 | 20176 | 312679 | Other anemias                                       | hematopoietic           |
| 348.8  | PRS_PC1 | 0,011  | 0,063 | 1,011 | 0,8571 | 264   | 332591 | Encephalopathy, not elsewhere classified            | neurological            |
| 389    | PRS_PC1 | 0,002  | 0,010 | 1,002 | 0,8623 | 9927  | 322928 | Hearing loss                                        | sense organs            |
| 703    | PRS_PC1 | 0,008  | 0,046 | 1,008 | 0,8644 | 498   | 332357 | Diseases of nail, NOS                               | dermatologic            |
| 145    | PRS_PC1 | 0,006  | 0,034 | 1,006 | 0,8682 | 916   | 331939 | Cancer of mouth                                     | neoplasms               |
| 426.91 | PRS_PC1 | 0,002  | 0,015 | 1,002 | 0,8697 | 4794  | 328061 | Cardiac pacemaker in situ                           | circulatory system      |
| 569.2  | PRS_PC1 | -0,006 | 0,036 | 0,994 | 0,8708 | 798   | 332057 | Gastrointestinal complications                      | digestive               |
| 54     | PRS_PC1 | -0,009 | 0,055 | 0,991 | 0,8730 | 344   | 332511 | Herpes simplex                                      | infectious diseases     |
| 707    | PRS_PC1 | -0,003 | 0,020 | 0,997 | 0,8738 | 2634  | 330221 | Chronic ulcer of skin                               | dermatologic            |
| 557    | PRS_PC1 | -0,007 | 0,045 | 0,993 | 0,8742 | 518   | 332337 | Intestinal malabsorption (non-celiac)               | digestive               |
| 747.13 | PRS_PC1 | 0,003  | 0,017 | 1,003 | 0,8745 | 3670  | 329185 | Congenital anomalies of great vessels               | congenital anomalies    |
| 512.8  | PRS_PC1 | -0,002 | 0,014 | 0,998 | 0,8759 | 5067  | 327788 | Cough                                               | respiratory             |
| 281    | PRS_PC1 | 0,004  | 0,023 | 1,004 | 0,8762 | 1941  | 330914 | Other deficiency anemia                             | hematopoietic           |
| 361    | PRS_PC1 | 0,002  | 0,016 | 1,002 | 0,8764 | 4334  | 328521 | Retinal detachments and defects                     | sense organs            |
| 241    | PRS_PC1 | 0,004  | 0,025 | 1,004 | 0,8764 | 1705  | 331150 | Nontoxic nodular goiter                             | endocrine/metabolic     |
| 674    | PRS_PC1 | 0,010  | 0,064 | 1,010 | 0,8764 | 259   | 332596 | Other complications of the puerperium NEC           | pregnancy complications |
| 512.9  | PRS_PC1 | 0,004  | 0,028 | 1,004 | 0,8791 | 1355  | 331500 | Other dyspnea                                       | respiratory             |
| 512    | PRS_PC1 | -0,001 | 0,008 | 0,999 | 0,8792 | 15327 | 317528 | Other symptoms of respiratory system                | respiratory             |
| 362.2  | PRS_PC1 | 0,002  | 0,014 | 1,002 | 0,8793 | 5591  | 327264 | Degeneration of macula and posterior pole of retina | sense organs            |
| 279.11 | PRS_PC1 | -0,010 | 0,064 | 0,990 | 0,8794 | 256   | 332599 | Deficiency of humoral immunity                      | endocrine/metabolic     |

|        |         |        |       |       |        |       |        |                               |                       |
|--------|---------|--------|-------|-------|--------|-------|--------|-------------------------------|-----------------------|
| 604    | PRS_PC1 | -0,002 | 0,016 | 0,998 | 0,8808 | 4377  | 328478 | Disorders of penis            | genitourinary         |
|        |         |        |       |       |        |       |        | Macular degeneration (senile) |                       |
| 362.29 | PRS_PC1 | 0,002  | 0,014 | 1,002 | 0,8823 | 5588  | 327267 | of retina NOS                 | sense organs          |
| 747.1  | PRS_PC1 | 0,002  | 0,015 | 1,002 | 0,8865 | 4855  | 328000 | Cardiac congenital anomalies  | congenital anomalies  |
|        |         |        |       |       |        |       |        | Myalgia and myositis          |                       |
| 770    | PRS_PC1 | -0,004 | 0,031 | 0,996 | 0,8896 | 1089  | 331766 | unspecified                   | symptoms              |
| 530.9  | PRS_PC1 | 0,003  | 0,019 | 1,003 | 0,8902 | 3007  | 329848 | Heartburn                     | digestive             |
| 733.2  | PRS_PC1 | 0,007  | 0,047 | 1,007 | 0,8904 | 464   | 332391 | Cyst of bone                  | musculoskeletal       |
| 1013   | PRS_PC1 | -0,006 | 0,045 | 0,994 | 0,8909 | 512   | 332343 | Asphyxia and hypoxemia        | symptoms              |
|        |         |        |       |       |        |       |        | Other inflammatory disorders  |                       |
| 601.8  | PRS_PC1 | -0,007 | 0,050 | 0,993 | 0,8912 | 409   | 332446 | of male genital organs        | genitourinary         |
|        |         |        |       |       |        |       |        | Dyspepsia and other specified |                       |
|        |         |        |       |       |        |       |        | disorders of function of      |                       |
| 536.8  | PRS_PC1 | -0,009 | 0,064 | 0,991 | 0,8932 | 255   | 332600 | stomach                       | digestive             |
|        |         |        |       |       |        |       |        | Other unspecified back        |                       |
| 724.9  | PRS_PC1 | -0,004 | 0,029 | 0,996 | 0,8938 | 1199  | 331656 | disorders                     | musculoskeletal       |
| 599.2  | PRS_PC1 | 0,001  | 0,009 | 1,001 | 0,8945 | 13153 | 319702 | Retention of urine            | genitourinary         |
|        |         |        |       |       |        |       |        | Toxic gastroenteritis and     |                       |
| 569.1  | PRS_PC1 | -0,006 | 0,044 | 0,994 | 0,8988 | 534   | 332321 | colitis                       | digestive             |
|        |         |        |       |       |        |       |        | Atrophy of female genital     |                       |
| 624.2  | PRS_PC1 | 0,005  | 0,040 | 1,005 | 0,8993 | 649   | 332206 | tract                         | genitourinary         |
| 276.42 | PRS_PC1 | -0,006 | 0,051 | 0,994 | 0,9004 | 403   | 332452 | Alkalosis                     | endocrine/metabolic   |
| 395.6  | PRS_PC1 | -0,002 | 0,020 | 0,998 | 0,9013 | 2661  | 330194 | Heart valve replaced          | circulatory system    |
|        |         |        |       |       |        |       |        | Cardiac pacemaker/device in   |                       |
| 426.9  | PRS_PC1 | 0,002  | 0,014 | 1,002 | 0,9017 | 5128  | 327727 | situ                          | circulatory system    |
|        |         |        |       |       |        |       |        | Paroxysmal tachycardia,       |                       |
| 427.1  | PRS_PC1 | 0,002  | 0,015 | 1,002 | 0,9037 | 4978  | 327877 | unspecified                   | circulatory system    |
| 350.3  | PRS_PC1 | 0,005  | 0,041 | 1,005 | 0,9038 | 632   | 332223 | Lack of coordination          | neurological          |
| 949    | PRS_PC1 | 0,005  | 0,043 | 1,005 | 0,9040 | 570   | 332285 | Allergies, other              | injuries & poisonings |
| 394.2  | PRS_PC1 | 0,002  | 0,013 | 1,002 | 0,9045 | 6313  | 326542 | Mitral valve disease          | circulatory system    |

|        |         |        |       |       |        |       |        |                                 |                     |
|--------|---------|--------|-------|-------|--------|-------|--------|---------------------------------|---------------------|
|        |         |        |       |       |        |       |        | Other abnormal blood            |                     |
| 790.6  | PRS_PC1 | 0,001  | 0,010 | 1,001 | 0,9075 | 11509 | 321346 | chemistry                       | symptoms            |
| 364.4  | PRS_PC1 | -0,003 | 0,033 | 0,997 | 0,9150 | 968   | 331887 | Corneal degenerations           | sense organs        |
|        |         |        |       |       |        |       |        | Lipoma of skin and              |                     |
| 214.1  | PRS_PC1 | 0,001  | 0,014 | 1,001 | 0,9165 | 5602  | 327253 | subcutaneous tissue             | neoplasms           |
|        |         |        |       |       |        |       |        | Osteomyelitis, periostitis, and |                     |
| 710    | PRS_PC1 | -0,003 | 0,032 | 0,997 | 0,9169 | 1010  | 331845 | other infections involving bone | musculoskeletal     |
| 738.4  | PRS_PC1 | 0,002  | 0,019 | 1,002 | 0,9179 | 2773  | 330082 | Acquired spondylolisthesis      | musculoskeletal     |
| 458.1  | PRS_PC1 | 0,002  | 0,017 | 1,002 | 0,9182 | 3533  | 329322 | Orthostatic hypotension         | circulatory system  |
| 1010   | PRS_PC1 | 0,001  | 0,008 | 1,001 | 0,9194 | 17900 | 314955 | Other tests                     | symptoms            |
|        |         |        |       |       |        |       |        | Dermatophytosis /               |                     |
| 110    | PRS_PC1 | -0,005 | 0,046 | 0,995 | 0,9204 | 492   | 332363 | Dermatomycosis                  | infectious diseases |
|        |         |        |       |       |        |       |        | Suppurative and unspecified     |                     |
| 381.11 | PRS_PC1 | -0,003 | 0,031 | 0,997 | 0,9212 | 1055  | 331800 | otitis media                    | sense organs        |
| 200.1  | PRS_PC1 | 0,004  | 0,045 | 1,004 | 0,9218 | 512   | 332343 | Polycythemia vera               | neoplasms           |
|        |         |        |       |       |        |       |        | Nonrheumatic aortic valve       |                     |
| 395.2  | PRS_PC1 | -0,004 | 0,042 | 0,996 | 0,9221 | 579   | 332276 | disorders                       | circulatory system  |
| 496.3  | PRS_PC1 | 0,002  | 0,016 | 1,002 | 0,9223 | 3905  | 328950 | Bronchiectasis                  | respiratory         |
| 586.2  | PRS_PC1 | 0,002  | 0,019 | 1,002 | 0,9230 | 2853  | 330002 | Cyst of kidney, acquired        | genitourinary       |
| 512.7  | PRS_PC1 | 0,001  | 0,010 | 1,001 | 0,9233 | 10173 | 322682 | Shortness of breath             | respiratory         |
| 224    | PRS_PC1 | -0,006 | 0,066 | 0,994 | 0,9244 | 238   | 332617 | Benign neoplasm of eye          | neoplasms           |
| 447.1  | PRS_PC1 | -0,003 | 0,028 | 0,997 | 0,9251 | 1335  | 331520 | Stricture of artery             | circulatory system  |
| 427.5  | PRS_PC1 | -0,002 | 0,025 | 0,998 | 0,9275 | 1732  | 331123 | Arrhythmia (cardiac) NOS        | circulatory system  |
|        |         |        |       |       |        |       |        | Other and unspecified disc      |                     |
| 722.9  | PRS_PC1 | 0,001  | 0,013 | 1,001 | 0,9283 | 6289  | 326566 | disorder                        | musculoskeletal     |
| 446.9  | PRS_PC1 | -0,004 | 0,049 | 0,996 | 0,9302 | 439   | 332416 | Arteritis NOS                   | circulatory system  |
| 540.1  | PRS_PC1 | 0,002  | 0,018 | 1,002 | 0,9303 | 3202  | 329653 | Appendicitis                    | digestive           |
| 873    | PRS_PC1 | 0,004  | 0,052 | 1,004 | 0,9310 | 389   | 332466 | Broken tooth                    | symptoms            |

|        |         |        |       |       |        |       |        |                                |                     |
|--------|---------|--------|-------|-------|--------|-------|--------|--------------------------------|---------------------|
|        |         |        |       |       |        |       |        | Intestinal infection due to C. |                     |
| 008.52 | PRS_PC1 | -0,003 | 0,031 | 0,997 | 0,9354 | 1059  | 331796 | difficile                      | infectious diseases |
| 359.2  | PRS_PC1 | 0,004  | 0,045 | 1,004 | 0,9356 | 522   | 332333 | Myopathy                       | neurological        |
| 275.1  | PRS_PC1 | 0,003  | 0,032 | 1,003 | 0,9367 | 1030  | 331825 | Disorders of iron metabolism   | hematopoietic       |
|        |         |        |       |       |        |       |        | Other diseases of blood and    |                     |
| 289    | PRS_PC1 | -0,002 | 0,027 | 0,998 | 0,9392 | 1481  | 331374 | blood-forming organs           | hematopoietic       |
| 513.4  | PRS_PC1 | 0,004  | 0,057 | 1,004 | 0,9405 | 316   | 332539 | Hyperventilation               | respiratory         |
| 362    | PRS_PC1 | -0,001 | 0,011 | 0,999 | 0,9419 | 8184  | 324671 | Other retinal disorders        | sense organs        |
|        |         |        |       |       |        |       |        | Secondary malignancy of        |                     |
| 198.1  | PRS_PC1 | -0,001 | 0,011 | 0,999 | 0,9424 | 8618  | 324237 | lymph nodes                    | neoplasms           |
|        |         |        |       |       |        |       |        | Benign neoplasm of adrenal     |                     |
| 227.1  | PRS_PC1 | 0,004  | 0,054 | 1,004 | 0,9479 | 351   | 332504 | gland                          | neoplasms           |
| 721.2  | PRS_PC1 | 0,004  | 0,055 | 1,004 | 0,9491 | 337   | 332518 | Spondylosis with myelopathy    | musculoskeletal     |
|        |         |        |       |       |        |       |        | Secondary malignant            |                     |
| 198.4  | PRS_PC1 | 0,001  | 0,014 | 1,001 | 0,9498 | 5063  | 327792 | neoplasm of liver              | neoplasms           |
| 579.2  | PRS_PC1 | -0,002 | 0,036 | 0,998 | 0,9532 | 786   | 332069 | Splenomegaly                   | digestive           |
| 214    | PRS_PC1 | 0,001  | 0,011 | 1,001 | 0,9545 | 8061  | 324794 | Lipoma                         | neoplasms           |
|        |         |        |       |       |        |       |        | Benign neoplasm of             |                     |
| 229    | PRS_PC1 | -0,001 | 0,019 | 0,999 | 0,9558 | 2776  | 330079 | unspecified sites              | neoplasms           |
| 722    | PRS_PC1 | -0,001 | 0,010 | 0,999 | 0,9568 | 10566 | 322289 | Intervertebral disc disorders  | musculoskeletal     |
| 556.1  | PRS_PC1 | 0,002  | 0,030 | 1,002 | 0,9576 | 1152  | 331703 | Ulceration of intestine        | digestive           |
| 368.4  | PRS_PC1 | 0,002  | 0,039 | 1,002 | 0,9578 | 688   | 332167 | Visual field defects           | sense organs        |
|        |         |        |       |       |        |       |        | Other infectious and parasitic |                     |
| 136    | PRS_PC1 | 0,002  | 0,044 | 1,002 | 0,9589 | 545   | 332310 | diseases                       | infectious diseases |
|        |         |        |       |       |        |       |        | Supraventricular premature     |                     |
| 427.61 | PRS_PC1 | -0,003 | 0,063 | 0,997 | 0,9612 | 261   | 332594 | beats                          | circulatory system  |
|        |         |        |       |       |        |       |        | Benign neoplasm of bone and    |                     |
| 213    | PRS_PC1 | 0,002  | 0,051 | 1,002 | 0,9651 | 392   | 332463 | articular cartilage            | neoplasms           |

|        |         |        |       |       |        |       |        |                                                             |                         |
|--------|---------|--------|-------|-------|--------|-------|--------|-------------------------------------------------------------|-------------------------|
| 433.11 | PRS_PC1 | 0,002  | 0,067 | 1,002 | 0,9704 | 230   | 332625 | Occlusion of cerebral arteries,<br>with cerebral infarction | circulatory system      |
| 110.1  | PRS_PC1 | -0,002 | 0,046 | 0,998 | 0,9722 | 483   | 332372 | Dermatophytosis                                             | infectious diseases     |
| 695.41 | PRS_PC1 | -0,002 | 0,071 | 0,998 | 0,9723 | 205   | 332650 | Cutaneous lupus<br>erythematosus                            | dermatologic            |
| 643    | PRS_PC1 | -0,002 | 0,068 | 0,998 | 0,9759 | 228   | 332627 | Excessive vomiting in<br>pregnancy                          | pregnancy complications |
| 367.1  | PRS_PC1 | -0,001 | 0,020 | 0,999 | 0,9762 | 2562  | 330293 | Myopia                                                      | sense organs            |
| 540    | PRS_PC1 | 0,000  | 0,017 | 1,000 | 0,9781 | 3524  | 329331 | Appendiceal conditions                                      | digestive               |
| 817    | PRS_PC1 | 0,002  | 0,058 | 1,002 | 0,9787 | 307   | 332548 | Concussion                                                  | injuries & poisonings   |
| 281.1  | PRS_PC1 | 0,001  | 0,024 | 1,001 | 0,9788 | 1839  | 331016 | Megaloblastic anemia                                        | hematopoietic           |
| 622.2  | PRS_PC1 | 0,000  | 0,017 | 1,000 | 0,9808 | 3695  | 329160 | Mucous polyp of cervix                                      | genitourinary           |
| 550.1  | PRS_PC1 | 0,000  | 0,008 | 1,000 | 0,9810 | 20753 | 312102 | Inguinal hernia                                             | digestive               |
| 803    | PRS_PC1 | 0,000  | 0,009 | 1,000 | 0,9820 | 12204 | 320651 | Fracture of upper limb                                      | injuries & poisonings   |
| 394.3  | PRS_PC1 | 0,000  | 0,020 | 1,000 | 0,9823 | 2636  | 330219 | Aortic valve disease                                        | circulatory system      |
| 372    | PRS_PC1 | 0,001  | 0,030 | 1,001 | 0,9842 | 1177  | 331678 | Disorders of conjunctiva                                    | sense organs            |
| 614.51 | PRS_PC1 | -0,001 | 0,028 | 0,999 | 0,9845 | 1376  | 331479 | Cervicitis and endocervicitis                               | genitourinary           |
| 830    | PRS_PC1 | 0,000  | 0,020 | 1,000 | 0,9847 | 2589  | 330266 | Dislocation                                                 | injuries & poisonings   |
| 610.1  | PRS_PC1 | 0,000  | 0,032 | 1,000 | 0,9895 | 1044  | 331811 | Cystic mastopathy                                           | genitourinary           |
| 727.5  | PRS_PC1 | 0,000  | 0,033 | 1,000 | 0,9910 | 943   | 331912 | Rupture of synovium                                         | musculoskeletal         |
| 946    | PRS_PC1 | 0,000  | 0,037 | 1,000 | 0,9916 | 762   | 332093 | Anaphylactic shock NOS                                      | injuries & poisonings   |
| 241.1  | PRS_PC1 | 0,000  | 0,036 | 1,000 | 0,9928 | 782   | 332073 | Nontoxic uninodular goiter                                  | endocrine/metabolic     |
| 695.42 | PRS_PC1 | 0,000  | 0,046 | 1,000 | 0,9936 | 484   | 332371 | Systemic lupus erythematosus                                | dermatologic            |
| 428.1  | PRS_PC1 | 0,000  | 0,015 | 1,000 | 0,9936 | 4842  | 328013 | Congestive heart failure (CHF)<br>NOS                       | circulatory system      |
| 189.11 | PRS_PC1 | 0,000  | 0,025 | 1,000 | 0,9949 | 1626  | 331229 | Malignant neoplasm of<br>kidney, except pelvis              | neoplasms               |
| 395    | PRS_PC1 | 0,000  | 0,011 | 1,000 | 0,9949 | 8633  | 324222 | Heart valve disorders                                       | circulatory system      |

|        |         |       |       |       |        |      |        |                                |                     |
|--------|---------|-------|-------|-------|--------|------|--------|--------------------------------|---------------------|
| 348.9  | PRS_PC1 | 0,000 | 0,036 | 1,000 | 0,9955 | 797  | 332058 | Other conditions of brain, NOS | neurological        |
| 520.2  | PRS_PC1 | 0,000 | 0,020 | 1,000 | 0,9962 | 2611 | 330244 | Disturbances in tooth eruption | digestive           |
| 117.4  | PRS_PC1 | 0,000 | 0,061 | 1,000 | 0,9963 | 277  | 332578 | Aspergillosis                  | infectious diseases |
| 279.7  | PRS_PC1 | 0,000 | 0,055 | 1,000 | 0,9995 | 341  | 332514 | Other immunological findings   | endocrine/metabolic |
| 614.54 | PRS_PC1 | 0,000 | 0,056 | 1,000 | 0,9997 | 329  | 332526 | Abscess or ulceration of vulva | genitourinary       |

**Sheet 3 Results from the sensitivity analysis adjusting for antipsychotic use in individuals with GP information**

| phenotype | snp     | beta   | SE    | OR    | p        | n_cases | n_controls | description                                     | group               |
|-----------|---------|--------|-------|-------|----------|---------|------------|-------------------------------------------------|---------------------|
| 296.1     | PRS_PC1 | 0,343  | 0,039 | 1,409 | 6,63E-19 | 695     | 156323     | Bipolar                                         | mental disorders    |
| 296       | PRS_PC1 | 0,201  | 0,024 | 1,222 | 1,81E-17 | 1885    | 155133     | Mood disorders                                  | mental disorders    |
| 316       | PRS_PC1 | 0,105  | 0,015 | 1,111 | 4,62E-12 | 4635    | 152383     | Substance addiction and disorders               | mental disorders    |
| 727       | PRS_PC1 | -0,059 | 0,010 | 0,943 | 1,10E-08 | 10612   | 146406     | Other disorders of synovium, tendon, and bursa  | musculoskeletal     |
| 727.1     | PRS_PC1 | -0,059 | 0,010 | 0,943 | 1,10E-08 | 10612   | 146406     | Synovitis and tenosynovitis                     | musculoskeletal     |
| 351       | PRS_PC1 | -0,050 | 0,009 | 0,951 | 1,39E-08 | 14715   | 142303     | Other peripheral nerve disorders                | neurological        |
| 496.2     | PRS_PC1 | 0,064  | 0,012 | 1,066 | 4,94E-08 | 8160    | 148858     | Chronic bronchitis                              | respiratory         |
| 496.21    | PRS_PC1 | 0,061  | 0,012 | 1,063 | 2,01E-07 | 7971    | 149047     | Obstructive chronic bronchitis                  | respiratory         |
| 278.1     | PRS_PC1 | -0,038 | 0,008 | 0,962 | 6,73E-07 | 20325   | 136693     | Obesity                                         | endocrine/metabolic |
| 278       | PRS_PC1 | -0,038 | 0,008 | 0,963 | 7,06E-07 | 20373   | 136645     | Overweight, obesity and other hyperalimentation | endocrine/metabolic |
| 496       | PRS_PC1 | 0,052  | 0,011 | 1,053 | 1,20E-06 | 9959    | 147059     | Chronic airway obstruction                      | respiratory         |
| 454.1     | PRS_PC1 | 0,048  | 0,010 | 1,049 | 1,34E-06 | 11405   | 145613     | Varicose veins of lower extremity               | circulatory system  |
| 564       | PRS_PC1 | 0,032  | 0,007 | 1,033 | 1,66E-06 | 27863   | 129155     | Functional digestive disorders                  | digestive           |
| 700       | PRS_PC1 | 0,096  | 0,021 | 1,100 | 3,29E-06 | 2502    | 154516     | Corns and callosities                           | dermatologic        |
| 726       | PRS_PC1 | -0,037 | 0,008 | 0,964 | 3,33E-06 | 18740   | 138278     | Peripheral enthesopathies and allied syndromes  | musculoskeletal     |
| 454       | PRS_PC1 | 0,044  | 0,010 | 1,045 | 4,23E-06 | 12397   | 144621     | Varicose veins                                  | circulatory system  |
| 716       | PRS_PC1 | -0,036 | 0,008 | 0,965 | 7,50E-06 | 18431   | 138587     | Other arthropathies                             | musculoskeletal     |
| 716.9     | PRS_PC1 | -0,036 | 0,008 | 0,965 | 7,50E-06 | 18431   | 138587     | Arthropathy NOS                                 | musculoskeletal     |
| 716.2     | PRS_PC1 | -0,036 | 0,008 | 0,965 | 9,02E-06 | 18078   | 138940     | Unspecified monoarthritis                       | musculoskeletal     |

|       |         |        |       |       |          |       |        |                               |                     |
|-------|---------|--------|-------|-------|----------|-------|--------|-------------------------------|---------------------|
| 380   | PRS_PC1 | 0,033  | 0,008 | 1,033 | 1,77E-05 | 21050 | 135968 | Disorders of external ear     | sense organs        |
|       |         |        |       |       |          |       |        | Other disorders of soft       |                     |
| 729   | PRS_PC1 | -0,041 | 0,010 | 0,960 | 4,12E-05 | 11189 | 145829 | tissues                       | musculoskeletal     |
| 495   | PRS_PC1 | 0,029  | 0,007 | 1,029 | 4,66E-05 | 24399 | 132619 | Asthma                        | respiratory         |
| 250   | PRS_PC1 | -0,035 | 0,009 | 0,966 | 9,58E-05 | 14560 | 142458 | Diabetes mellitus             | endocrine/metabolic |
|       |         |        |       |       |          |       |        | Other diseases of respiratory |                     |
|       |         |        |       |       |          |       |        | system, not elsewhere         |                     |
| 519   | PRS_PC1 | 0,023  | 0,006 | 1,023 | 1,03E-04 | 40142 | 116876 | classified                    | respiratory         |
|       |         |        |       |       |          |       |        | Other diseases of respiratory |                     |
| 519.8 | PRS_PC1 | 0,023  | 0,006 | 1,023 | 1,03E-04 | 40142 | 116876 | system, NEC                   | respiratory         |
| 253.1 | PRS_PC1 | 0,186  | 0,051 | 1,205 | 2,78E-04 | 395   | 156623 | Pituitary hyperfunction       | endocrine/metabolic |
|       |         |        |       |       |          |       |        | Disorders of the pituitary    |                     |
|       |         |        |       |       |          |       |        | gland and its hypothalamic    |                     |
| 253   | PRS_PC1 | 0,186  | 0,051 | 1,204 | 2,83E-04 | 396   | 156622 | control                       | endocrine/metabolic |
|       |         |        |       |       |          |       |        | Diseases of pulp and          |                     |
| 522   | PRS_PC1 | 0,057  | 0,016 | 1,058 | 2,90E-04 | 4351  | 152667 | periapical tissues            | digestive           |
| 695   | PRS_PC1 | 0,045  | 0,013 | 1,047 | 3,22E-04 | 6837  | 150181 | Erythematous conditions       | dermatologic        |
| 706.1 | PRS_PC1 | 0,060  | 0,017 | 1,062 | 3,46E-04 | 3834  | 153184 | Acne                          | dermatologic        |
|       |         |        |       |       |          |       |        | Other disorders of pancreatic |                     |
| 251   | PRS_PC1 | -0,085 | 0,024 | 0,919 | 3,53E-04 | 1873  | 155145 | internal secretion            | endocrine/metabolic |
| 695.3 | PRS_PC1 | 0,061  | 0,017 | 1,063 | 3,67E-04 | 3640  | 153378 | Rosacea                       | dermatologic        |
| 250.2 | PRS_PC1 | -0,031 | 0,009 | 0,969 | 5,35E-04 | 14155 | 142863 | Type 2 diabetes               | endocrine/metabolic |
| 564.1 | PRS_PC1 | 0,028  | 0,008 | 1,028 | 8,58E-04 | 17251 | 139767 | Irritable Bowel Syndrome      | digestive           |
| 497   | PRS_PC1 | 0,047  | 0,015 | 1,048 | 1,54E-03 | 4914  | 152104 | Bronchitis                    | respiratory         |
|       |         |        |       |       |          |       |        | Urethritis and urethral       |                     |
| 592.2 | PRS_PC1 | 0,115  | 0,038 | 1,122 | 2,80E-03 | 704   | 156314 | syndrome                      | genitourinary       |
| 250.1 | PRS_PC1 | -0,072 | 0,024 | 0,930 | 3,06E-03 | 1767  | 155251 | Type 1 diabetes               | endocrine/metabolic |
|       |         |        |       |       |          |       |        | Psychogenic and               |                     |
| 303   | PRS_PC1 | 0,067  | 0,023 | 1,069 | 3,16E-03 | 2040  | 154978 | somatoform disorders          | mental disorders    |



|        |         |       |       |       |          |       |        |                                                                           |                         |
|--------|---------|-------|-------|-------|----------|-------|--------|---------------------------------------------------------------------------|-------------------------|
| 300    | PRS_PC1 | 0,059 | 0,020 | 1,061 | 3,30E-03 | 2595  | 154423 | Anxiety disorders                                                         | mental disorders        |
| 303.4  | PRS_PC1 | 0,066 | 0,023 | 1,068 | 3,53E-03 | 2037  | 154981 | Somatoform disorder                                                       | mental disorders        |
| 149    | PRS_PC1 | 0,174 | 0,061 | 1,190 | 4,15E-03 | 280   | 156738 | Cancer of larynx, pharynx,<br>nasal cavities                              | neoplasms               |
| 601.1  | PRS_PC1 | 0,062 | 0,022 | 1,064 | 4,29E-03 | 2246  | 154772 | Prostatitis                                                               | genitourinary           |
| 472    | PRS_PC1 | 0,044 | 0,016 | 1,045 | 5,46E-03 | 4370  | 152648 | Chronic pharyngitis and<br>nasopharyngitis                                | respiratory             |
| 300.3  | PRS_PC1 | 0,130 | 0,047 | 1,139 | 5,51E-03 | 471   | 156547 | Obsessive-compulsive<br>disorders                                         | mental disorders        |
| 706    | PRS_PC1 | 0,028 | 0,010 | 1,028 | 5,93E-03 | 10940 | 146078 | Diseases of sebaceous<br>glands                                           | dermatologic            |
| 665    | PRS_PC1 | 0,064 | 0,023 | 1,066 | 6,11E-03 | 2318  | 154700 | Obstetrical/birth trauma                                                  | pregnancy complications |
| 592    | PRS_PC1 | 0,027 | 0,010 | 1,027 | 6,63E-03 | 11752 | 145266 | Cystitis and urethritis                                                   | genitourinary           |
| 500    | PRS_PC1 | 0,117 | 0,045 | 1,125 | 8,62E-03 | 522   | 156496 | Lung disease due to external<br>agents                                    | respiratory             |
| 317    | PRS_PC1 | 0,093 | 0,036 | 1,098 | 8,76E-03 | 820   | 156198 | Alcohol-related disorders                                                 | mental disorders        |
| 317.1  | PRS_PC1 | 0,093 | 0,036 | 1,098 | 8,76E-03 | 820   | 156198 | Alcoholism                                                                | mental disorders        |
| 317.11 | PRS_PC1 | 0,093 | 0,036 | 1,098 | 8,76E-03 | 820   | 156198 | Alcoholic liver damage                                                    | mental disorders        |
| 480    | PRS_PC1 | 0,025 | 0,010 | 1,026 | 9,07E-03 | 12091 | 144927 | Pneumonia                                                                 | respiratory             |
| 619    | PRS_PC1 | 0,035 | 0,014 | 1,036 | 9,25E-03 | 6048  | 150970 | Noninflammatory female<br>genital disorders                               | genitourinary           |
| 569    | PRS_PC1 | 0,025 | 0,010 | 1,025 | 9,36E-03 | 12489 | 144529 | Other disorders of intestine                                              | digestive               |
| 291    | PRS_PC1 | 0,112 | 0,043 | 1,118 | 9,73E-03 | 555   | 156463 | Other specified nonpsychotic<br>and/or transient mental<br>disorders      | mental disorders        |
| 618    | PRS_PC1 | 0,030 | 0,012 | 1,030 | 0,0105   | 8450  | 148568 | Genital prolapse                                                          | genitourinary           |
| 618.1  | PRS_PC1 | 0,030 | 0,012 | 1,030 | 0,0105   | 8450  | 148568 | Prolapse of vaginal walls                                                 | genitourinary           |
| 367    | PRS_PC1 | 0,036 | 0,014 | 1,037 | 0,0105   | 5353  | 151665 | Disorders of refraction and<br>accommodation; blindness<br>and low vision | sense organs            |

|       |         |        |       |       |        |       |        |                                                                        |                     |
|-------|---------|--------|-------|-------|--------|-------|--------|------------------------------------------------------------------------|---------------------|
| 180   | PRS_PC1 | 0,035  | 0,014 | 1,035 | 0,0108 | 6065  | 150953 | Cervical cancer and dysplasia                                          | neoplasms           |
| 711   | PRS_PC1 | -0,132 | 0,052 | 0,877 | 0,0109 | 389   | 156629 | Arthropathy associated with infections                                 | musculoskeletal     |
| 694.2 | PRS_PC1 | 0,050  | 0,020 | 1,051 | 0,0113 | 2738  | 154280 | Other dyschromia                                                       | dermatologic        |
| 375   | PRS_PC1 | 0,028  | 0,011 | 1,029 | 0,0116 | 8959  | 148059 | Disorders of lacrimal system                                           | sense organs        |
| 500.2 | PRS_PC1 | 0,140  | 0,056 | 1,150 | 0,0120 | 336   | 156682 | Pneumoconiosis                                                         | respiratory         |
| 180.3 | PRS_PC1 | 0,035  | 0,014 | 1,035 | 0,0125 | 5838  | 151180 | Cervical intraepithelial neoplasia [CIN] [Cervical dysplasia]          | neoplasms           |
| 496.1 | PRS_PC1 | 0,061  | 0,025 | 1,063 | 0,0147 | 1693  | 155325 | Emphysema                                                              | respiratory         |
| 280   | PRS_PC1 | -0,024 | 0,010 | 0,977 | 0,0161 | 11625 | 145393 | Iron deficiency anemias                                                | hematopoietic       |
| 280.1 | PRS_PC1 | -0,024 | 0,010 | 0,977 | 0,0161 | 11625 | 145393 | Iron deficiency anemias, unspecified or not due to blood loss          | hematopoietic       |
| 327   | PRS_PC1 | 0,026  | 0,011 | 1,026 | 0,0161 | 9652  | 147366 | Sleep disorders                                                        | neurological        |
| 711.1 | PRS_PC1 | -0,128 | 0,053 | 0,880 | 0,0163 | 367   | 156651 | Pyogenic arthritis                                                     | musculoskeletal     |
| 619.1 | PRS_PC1 | 0,035  | 0,015 | 1,036 | 0,0163 | 5159  | 151859 | Noninflammatory disorders of ovary, fallopian tube, and broad ligament | genitourinary       |
| 261   | PRS_PC1 | 0,043  | 0,018 | 1,044 | 0,0165 | 3243  | 153775 | Vitamin deficiency                                                     | endocrine/metabolic |
| 340   | PRS_PC1 | -0,025 | 0,010 | 0,976 | 0,0168 | 10649 | 146369 | Migraine                                                               | neurological        |
| 694   | PRS_PC1 | 0,042  | 0,018 | 1,043 | 0,0181 | 3341  | 153677 | Dyschromia and Vitiligo                                                | dermatologic        |
| 611   | PRS_PC1 | 0,024  | 0,010 | 1,025 | 0,0196 | 10855 | 146163 | Abnormal findings on mammogram or breast exam                          | genitourinary       |
| 611.3 | PRS_PC1 | 0,024  | 0,010 | 1,025 | 0,0196 | 10855 | 146163 | Lump or mass in breast                                                 | genitourinary       |
| 433.3 | PRS_PC1 | 0,043  | 0,019 | 1,044 | 0,0230 | 3030  | 153988 | Cerebral ischemia                                                      | circulatory system  |
| 79    | PRS_PC1 | -0,019 | 0,009 | 0,981 | 0,0246 | 16076 | 140942 | Viral infection                                                        | infectious diseases |

|        |         |        |       |       |        |       |        |                                                   |                         |
|--------|---------|--------|-------|-------|--------|-------|--------|---------------------------------------------------|-------------------------|
| 368    | PRS_PC1 | 0,029  | 0,013 | 1,030 | 0,0251 | 6367  | 150651 | Visual disturbances                               | sense organs            |
| 835    | PRS_PC1 | -0,023 | 0,010 | 0,977 | 0,0259 | 10353 | 146665 | Internal derangement of<br>knee                   | injuries & poisonings   |
| 574    | PRS_PC1 | -0,020 | 0,009 | 0,980 | 0,0269 | 13850 | 143168 | Cholelithiasis and<br>cholecystitis               | digestive               |
| 645    | PRS_PC1 | 0,104  | 0,047 | 1,109 | 0,0278 | 486   | 156532 | Late pregnancy and failed<br>induction            | pregnancy complications |
| 333.4  | PRS_PC1 | 0,086  | 0,040 | 1,089 | 0,0321 | 652   | 156366 | Torsion dystonia                                  | neurological            |
| 573    | PRS_PC1 | 0,030  | 0,014 | 1,031 | 0,0331 | 5362  | 151656 | Other disorders of liver                          | digestive               |
| 433.1  | PRS_PC1 | 0,078  | 0,037 | 1,081 | 0,0333 | 777   | 156241 | Occlusion and stenosis of<br>precerebral arteries | circulatory system      |
| 596.5  | PRS_PC1 | 0,039  | 0,018 | 1,040 | 0,0335 | 3093  | 153925 | Functional disorders of<br>bladder                | genitourinary           |
| 592.1  | PRS_PC1 | 0,022  | 0,010 | 1,022 | 0,0343 | 11170 | 145848 | Cystitis                                          | genitourinary           |
| 150    | PRS_PC1 | -0,128 | 0,061 | 0,880 | 0,0356 | 280   | 156738 | Cancer of esophagus                               | neoplasms               |
| 476    | PRS_PC1 | 0,016  | 0,008 | 1,016 | 0,0362 | 20252 | 136766 | Allergic rhinitis                                 | respiratory             |
| 695.4  | PRS_PC1 | 0,100  | 0,048 | 1,105 | 0,0365 | 458   | 156560 | Lupus (localized and<br>systemic)                 | dermatologic            |
| 367.9  | PRS_PC1 | 0,053  | 0,026 | 1,055 | 0,0381 | 1583  | 155435 | Blindness and low vision                          | sense organs            |
| 601    | PRS_PC1 | 0,034  | 0,017 | 1,035 | 0,0399 | 3994  | 153024 | Inflammatory diseases of<br>prostate              | genitourinary           |
| 686.2  | PRS_PC1 | 0,066  | 0,032 | 1,068 | 0,0416 | 1014  | 156004 | Impetigo                                          | dermatologic            |
| 701.5  | PRS_PC1 | -0,064 | 0,032 | 0,938 | 0,0441 | 1033  | 155985 | Abnormal granulation tissue                       | dermatologic            |
| 455    | PRS_PC1 | 0,019  | 0,010 | 1,019 | 0,0461 | 12246 | 144772 | Hemorrhoids                                       | circulatory system      |
| 364.1  | PRS_PC1 | 0,142  | 0,071 | 1,153 | 0,0463 | 204   | 156814 | Corneal opacity                                   | sense organs            |
| 695.42 | PRS_PC1 | 0,110  | 0,055 | 1,116 | 0,0463 | 340   | 156678 | Systemic lupus<br>erythematosus                   | dermatologic            |
| 433    | PRS_PC1 | 0,024  | 0,012 | 1,024 | 0,0467 | 7949  | 149069 | Cerebrovascular disease                           | circulatory system      |
| 613    | PRS_PC1 | 0,022  | 0,011 | 1,022 | 0,0475 | 9772  | 147246 | Other nonmalignant breast<br>conditions           | genitourinary           |

|       |         |        |       |       |        |       |        |                             |                      |
|-------|---------|--------|-------|-------|--------|-------|--------|-----------------------------|----------------------|
| 732.1 | PRS_PC1 | -0,087 | 0,044 | 0,917 | 0,0478 | 539   | 156479 | Juvenile osteochondrosis    | musculoskeletal      |
| 565   | PRS_PC1 | 0,031  | 0,016 | 1,031 | 0,0482 | 4354  | 152664 | Anal and rectal conditions  | digestive            |
|       |         |        |       |       |        |       |        | Digestive congenital        |                      |
| 750   | PRS_PC1 | 0,075  | 0,038 | 1,078 | 0,0504 | 706   | 156312 | anomalies                   | congenital anomalies |
| 172   | PRS_PC1 | -0,020 | 0,010 | 0,981 | 0,0513 | 11351 | 145667 | Skin cancer                 | neoplasms            |
| 379.2 | PRS_PC1 | 0,025  | 0,013 | 1,025 | 0,0524 | 6665  | 150353 | Disorders of vitreous body  | sense organs         |
|       |         |        |       |       |        |       |        | Psoriasis and related       |                      |
| 696   | PRS_PC1 | 0,022  | 0,011 | 1,022 | 0,0533 | 8281  | 148737 | disorders                   | dermatologic         |
| 112   | PRS_PC1 | 0,025  | 0,013 | 1,026 | 0,0545 | 6368  | 150650 | Candidiasis                 | infectious diseases  |
| 443   | PRS_PC1 | 0,026  | 0,014 | 1,027 | 0,0550 | 5693  | 151325 | Peripheral vascular disease | circulatory system   |
|       |         |        |       |       |        |       |        | Other specified peripheral  |                      |
| 443.8 | PRS_PC1 | 0,026  | 0,014 | 1,027 | 0,0550 | 5693  | 151325 | vascular diseases           | circulatory system   |
| 696.4 | PRS_PC1 | 0,023  | 0,012 | 1,023 | 0,0589 | 7173  | 149845 | Psoriasis                   | dermatologic         |
| 372   | PRS_PC1 | 0,026  | 0,014 | 1,027 | 0,0590 | 5635  | 151383 | Disorders of conjunctiva    | sense organs         |
|       |         |        |       |       |        |       |        | Inflammatory and toxic      |                      |
| 357   | PRS_PC1 | -0,070 | 0,038 | 0,932 | 0,0617 | 739   | 156279 | neuropathy                  | neurological         |
| 190   | PRS_PC1 | 0,132  | 0,071 | 1,141 | 0,0618 | 208   | 156810 | Cancer of eye               | neoplasms            |
| 369.5 | PRS_PC1 | 0,016  | 0,008 | 1,016 | 0,0631 | 16488 | 140530 | Conjunctivitis, infectious  | sense organs         |
| 369   | PRS_PC1 | 0,016  | 0,008 | 1,016 | 0,0646 | 16579 | 140439 | Infection of the eye        | sense organs         |
|       |         |        |       |       |        |       |        | Urethral stricture (not     |                      |
| 597.1 | PRS_PC1 | 0,041  | 0,023 | 1,042 | 0,0699 | 2061  | 154957 | specified as infectious)    | genitourinary        |
|       |         |        |       |       |        |       |        | Other CNS infection and     |                      |
| 324   | PRS_PC1 | -0,091 | 0,051 | 0,913 | 0,0717 | 403   | 156615 | poliomyelitis               | neurological         |
| 574.1 | PRS_PC1 | -0,017 | 0,009 | 0,983 | 0,0727 | 12882 | 144136 | Cholelithiasis              | digestive            |
|       |         |        |       |       |        |       |        | Calculus of lower urinary   |                      |
| 594.2 | PRS_PC1 | -0,075 | 0,042 | 0,928 | 0,0750 | 591   | 156427 | tract                       | genitourinary        |
|       |         |        |       |       |        |       |        | Other disorders of biliary  |                      |
| 575.8 | PRS_PC1 | -0,043 | 0,024 | 0,958 | 0,0769 | 1809  | 155209 | tract                       | digestive            |
| 172.3 | PRS_PC1 | -0,069 | 0,039 | 0,933 | 0,0778 | 674   | 156344 | Carcinoma in situ of skin   | neoplasms            |

|        |         |        |       |       |        |       |        |                                                                       |                         |
|--------|---------|--------|-------|-------|--------|-------|--------|-----------------------------------------------------------------------|-------------------------|
| 271    | PRS_PC1 | 0,122  | 0,069 | 1,130 | 0,0779 | 217   | 156801 | Disorders of carbohydrate transport and metabolism                    | endocrine/metabolic     |
| 271.3  | PRS_PC1 | 0,122  | 0,069 | 1,130 | 0,0779 | 217   | 156801 | Intestinal disaccharidase deficiencies and disaccharide malabsorption | endocrine/metabolic     |
| 585.3  | PRS_PC1 | -0,018 | 0,010 | 0,982 | 0,0827 | 10950 | 146068 | Chronic renal failure [CKD]                                           | genitourinary           |
| 636.3  | PRS_PC1 | 0,062  | 0,036 | 1,064 | 0,0845 | 827   | 156191 | Hemorrhage in early pregnancy                                         | pregnancy complications |
| 290    | PRS_PC1 | 0,039  | 0,023 | 1,040 | 0,0854 | 2090  | 154928 | Delirium dementia and amnesic and other cognitive disorders           | mental disorders        |
| 379    | PRS_PC1 | 0,020  | 0,012 | 1,020 | 0,0864 | 8052  | 148966 | Other disorders of eye                                                | sense organs            |
| 132.1  | PRS_PC1 | 0,117  | 0,068 | 1,124 | 0,0873 | 223   | 156795 | Pediculosis and phthirus infestation                                  | infectious diseases     |
| 290.16 | PRS_PC1 | 0,076  | 0,045 | 1,079 | 0,0934 | 511   | 156507 | Vascular dementia                                                     | mental disorders        |
| 361    | PRS_PC1 | 0,033  | 0,020 | 1,033 | 0,0948 | 2767  | 154251 | Retinal detachments and defects                                       | sense organs            |
| 361.1  | PRS_PC1 | 0,033  | 0,020 | 1,033 | 0,0948 | 2767  | 154251 | Retinal detachment with retinal defect                                | sense organs            |
| 261.4  | PRS_PC1 | 0,043  | 0,026 | 1,044 | 0,0953 | 1595  | 155423 | Vitamin D deficiency                                                  | endocrine/metabolic     |
| 291.4  | PRS_PC1 | 0,076  | 0,046 | 1,078 | 0,0976 | 500   | 156518 | Specific nonpsychotic mental disorders due to brain damage            | mental disorders        |
| 377    | PRS_PC1 | 0,106  | 0,065 | 1,111 | 0,1020 | 248   | 156770 | Disorders of optic nerve and visual pathways                          | sense organs            |
| 377.3  | PRS_PC1 | 0,106  | 0,065 | 1,111 | 0,1020 | 248   | 156770 | Optic neuritis/neuropathy                                             | sense organs            |
| 261.2  | PRS_PC1 | 0,041  | 0,025 | 1,042 | 0,1021 | 1629  | 155389 | Vitamin B-complex deficiencies                                        | endocrine/metabolic     |
| 602    | PRS_PC1 | 0,047  | 0,029 | 1,049 | 0,1073 | 1216  | 155802 | Other disorders of prostate                                           | genitourinary           |

|        |         |        |       |       |        |       |        |                                                               |                         |
|--------|---------|--------|-------|-------|--------|-------|--------|---------------------------------------------------------------|-------------------------|
| 394    | PRS_PC1 | 0,053  | 0,033 | 1,055 | 0,1088 | 948   | 156070 | Rheumatic disease of the heart valves                         | circulatory system      |
| 305.2  | PRS_PC1 | 0,075  | 0,047 | 1,078 | 0,1101 | 469   | 156549 | Eating disorder                                               | mental disorders        |
| 411.9  | PRS_PC1 | -0,040 | 0,025 | 0,961 | 0,1112 | 1706  | 155312 | Other acute and subacute forms of ischemic heart disease      | circulatory system      |
| 371.3  | PRS_PC1 | 0,028  | 0,018 | 1,029 | 0,1116 | 3413  | 153605 | Inflammation of eyelids                                       | sense organs            |
| 381.1  | PRS_PC1 | -0,017 | 0,011 | 0,983 | 0,1144 | 9892  | 147126 | Otitis media                                                  | sense organs            |
| 634    | PRS_PC1 | 0,024  | 0,015 | 1,024 | 0,1153 | 4933  | 152085 | Miscarriage; stillbirth                                       | pregnancy complications |
| 153.3  | PRS_PC1 | 0,050  | 0,032 | 1,052 | 0,1156 | 1015  | 156003 | Malignant neoplasm of rectum, rectosigmoid junction, and anus | neoplasms               |
| 380.1  | PRS_PC1 | 0,014  | 0,009 | 1,014 | 0,1160 | 15426 | 141592 | Otitis externa                                                | sense organs            |
| 153    | PRS_PC1 | 0,032  | 0,021 | 1,033 | 0,1170 | 2504  | 154514 | Colorectal cancer                                             | neoplasms               |
| 172.2  | PRS_PC1 | -0,017 | 0,011 | 0,983 | 0,1185 | 9327  | 147691 | Other non-epithelial cancer of skin                           | neoplasms               |
| 471    | PRS_PC1 | 0,028  | 0,018 | 1,028 | 0,1191 | 3405  | 153613 | Nasal polyps                                                  | respiratory             |
| 008.5  | PRS_PC1 | 0,061  | 0,040 | 1,063 | 0,1239 | 654   | 156364 | Bacterial enteritis                                           | infectious diseases     |
| 433.21 | PRS_PC1 | 0,026  | 0,017 | 1,026 | 0,1261 | 3678  | 153340 | Cerebral artery occlusion, with cerebral infarction           | circulatory system      |
| 550.2  | PRS_PC1 | 0,012  | 0,008 | 1,012 | 0,1289 | 19879 | 137139 | Diaphragmatic hernia                                          | digestive               |
| 204.4  | PRS_PC1 | -0,092 | 0,061 | 0,912 | 0,1317 | 277   | 156741 | Multiple myeloma                                              | neoplasms               |
| 356    | PRS_PC1 | 0,094  | 0,063 | 1,099 | 0,1328 | 264   | 156754 | Hereditary and idiopathic peripheral neuropathy               | neurological            |
| 695.7  | PRS_PC1 | 0,031  | 0,021 | 1,032 | 0,1340 | 2403  | 154615 | Prurigo and Lichen                                            | dermatologic            |
| 939    | PRS_PC1 | -0,014 | 0,010 | 0,986 | 0,1365 | 12476 | 144542 | Atopic/contact dermatitis due to other or unspecified         | dermatologic            |
| 755    | PRS_PC1 | 0,049  | 0,033 | 1,051 | 0,1386 | 936   | 156082 | Congenital anomalies of limbs                                 | congenital anomalies    |

|        |         |        |       |       |        |       |        |                                                                                          |                      |
|--------|---------|--------|-------|-------|--------|-------|--------|------------------------------------------------------------------------------------------|----------------------|
| 613.1  | PRS_PC1 | -0,044 | 0,030 | 0,957 | 0,1400 | 1209  | 155809 | Inflammatory disease of breast                                                           | genitourinary        |
| 599.1  | PRS_PC1 | -0,031 | 0,021 | 0,969 | 0,1443 | 2329  | 154689 | Urinary obstruction                                                                      | genitourinary        |
| 381    | PRS_PC1 | -0,014 | 0,009 | 0,986 | 0,1444 | 12788 | 144230 | Otitis media and Eustachian tube disorders                                               | sense organs         |
| 341    | PRS_PC1 | -0,084 | 0,058 | 0,919 | 0,1480 | 304   | 156714 | Other demyelinating diseases of central nervous system                                   | neurological         |
| 362.7  | PRS_PC1 | -0,042 | 0,029 | 0,959 | 0,1493 | 1223  | 155795 | Hereditary retinal dystrophies                                                           | sense organs         |
| 184.11 | PRS_PC1 | -0,066 | 0,046 | 0,936 | 0,1509 | 500   | 156518 | Malignant neoplasm of ovary                                                              | neoplasms            |
| 750.2  | PRS_PC1 | 0,074  | 0,052 | 1,077 | 0,1512 | 387   | 156631 | Lower gastrointestinal congenital anomalies                                              | congenital anomalies |
| 596    | PRS_PC1 | 0,015  | 0,011 | 1,015 | 0,1521 | 9841  | 147177 | Other disorders of bladder                                                               | genitourinary        |
| 731    | PRS_PC1 | -0,067 | 0,047 | 0,936 | 0,1526 | 479   | 156539 | Osteitis deformans and osteopathies associated with other disorders classified elsewhere | musculoskeletal      |
| 550.3  | PRS_PC1 | 0,057  | 0,040 | 1,059 | 0,1543 | 642   | 156376 | Femoral hernia                                                                           | digestive            |
| 580.32 | PRS_PC1 | 0,083  | 0,058 | 1,086 | 0,1544 | 307   | 156711 | Nephritis and nephropathy with pathological lesion                                       | genitourinary        |
| 585    | PRS_PC1 | -0,013 | 0,009 | 0,987 | 0,1569 | 15095 | 141923 | Renal failure                                                                            | genitourinary        |
| 550.4  | PRS_PC1 | -0,025 | 0,018 | 0,976 | 0,1594 | 3474  | 153544 | Umbilical hernia                                                                         | digestive            |
| 755.6  | PRS_PC1 | 0,100  | 0,071 | 1,105 | 0,1594 | 206   | 156812 | Other congenital anomalies of lower limb, including pelvic girdle                        | congenital anomalies |
| 733.4  | PRS_PC1 | -0,067 | 0,048 | 0,935 | 0,1603 | 449   | 156569 | Aseptic necrosis of bone                                                                 | musculoskeletal      |
| 562    | PRS_PC1 | 0,010  | 0,007 | 1,010 | 0,1613 | 23882 | 133136 | Diverticulosis and diverticulitis                                                        | digestive            |

|        |         |        |       |       |        |       |        |                               |                     |
|--------|---------|--------|-------|-------|--------|-------|--------|-------------------------------|---------------------|
| 562.1  | PRS_PC1 | 0,010  | 0,007 | 1,010 | 0,1613 | 23882 | 133136 | Diverticulosis                | digestive           |
| 550    | PRS_PC1 | 0,009  | 0,006 | 1,009 | 0,1664 | 35351 | 121667 | Abdominal hernia              | digestive           |
| 575    | PRS_PC1 | -0,025 | 0,018 | 0,975 | 0,1675 | 3202  | 153816 | Other biliary tract disease   | digestive           |
|        |         |        |       |       |        |       |        | Suppurative and unspecified   |                     |
| 381.11 | PRS_PC1 | -0,017 | 0,013 | 0,983 | 0,1735 | 6894  | 150124 | otitis media                  | sense organs        |
|        |         |        |       |       |        |       |        | Other inflammatory            |                     |
|        |         |        |       |       |        |       |        | disorders of male genital     |                     |
| 601.8  | PRS_PC1 | 0,082  | 0,061 | 1,086 | 0,1749 | 283   | 156735 | organs                        | genitourinary       |
| 290.1  | PRS_PC1 | 0,032  | 0,023 | 1,032 | 0,1750 | 1945  | 155073 | Dementias                     | mental disorders    |
|        |         |        |       |       |        |       |        | Other disorders of urethra    |                     |
| 597    | PRS_PC1 | 0,027  | 0,020 | 1,027 | 0,1769 | 2660  | 154358 | and urinary tract             | genitourinary       |
| 401.1  | PRS_PC1 | -0,008 | 0,006 | 0,992 | 0,1770 | 56023 | 100995 | Essential hypertension        | circulatory system  |
|        |         |        |       |       |        |       |        | Other disorders of the kidney |                     |
| 586    | PRS_PC1 | 0,094  | 0,070 | 1,098 | 0,1770 | 214   | 156804 | and ureters                   | genitourinary       |
| 300.1  | PRS_PC1 | 0,030  | 0,023 | 1,030 | 0,1851 | 2078  | 154940 | Anxiety disorder              | mental disorders    |
| 300.13 | PRS_PC1 | 0,030  | 0,023 | 1,030 | 0,1851 | 2078  | 154940 | Phobia                        | mental disorders    |
| 286    | PRS_PC1 | 0,040  | 0,030 | 1,040 | 0,1856 | 1159  | 155859 | Coagulation defects           | hematopoietic       |
|        |         |        |       |       |        |       |        | Malignant neoplasm of ovary   |                     |
| 184.1  | PRS_PC1 | -0,058 | 0,044 | 0,943 | 0,1862 | 537   | 156481 | and other uterine adnexa      | neoplasms           |
| 259    | PRS_PC1 | 0,094  | 0,071 | 1,099 | 0,1868 | 204   | 156814 | Other endocrine disorders     | endocrine/metabolic |
| 614.51 | PRS_PC1 | -0,043 | 0,033 | 0,958 | 0,1890 | 980   | 156038 | Cervicitis and endocervicitis | genitourinary       |
| 401    | PRS_PC1 | -0,007 | 0,006 | 0,993 | 0,1903 | 56096 | 100922 | Hypertension                  | circulatory system  |
| 079.2  | PRS_PC1 | -0,031 | 0,024 | 0,969 | 0,1917 | 1802  | 155216 | Infectious mononucleosis      | infectious diseases |
| 284    | PRS_PC1 | -0,056 | 0,043 | 0,946 | 0,1936 | 560   | 156458 | Aplastic anemia               | hematopoietic       |
| 323    | PRS_PC1 | 0,065  | 0,050 | 1,067 | 0,1956 | 411   | 156607 | Encephalitis                  | neurological        |
| 760    | PRS_PC1 | 0,008  | 0,006 | 1,008 | 0,1969 | 41105 | 115913 | Back pain                     | symptoms            |
| 600    | PRS_PC1 | 0,013  | 0,010 | 1,013 | 0,2082 | 12452 | 144566 | Hyperplasia of prostate       | genitourinary       |
| 394.7  | PRS_PC1 | 0,053  | 0,043 | 1,055 | 0,2088 | 575   | 156443 | Disease of tricuspid valve    | circulatory system  |



|        |         |        |       |       |        |       |        |                                                                  |                      |
|--------|---------|--------|-------|-------|--------|-------|--------|------------------------------------------------------------------|----------------------|
| 302    | PRS_PC1 | 0,034  | 0,027 | 1,035 | 0,2118 | 1399  | 155619 | Sexual and gender identity disorders                             | mental disorders     |
| 750.1  | PRS_PC1 | 0,074  | 0,060 | 1,077 | 0,2179 | 288   | 156730 | Upper gastrointestinal congenital anomalies                      | congenital anomalies |
| 433.2  | PRS_PC1 | 0,017  | 0,014 | 1,017 | 0,2194 | 5722  | 151296 | Occlusion of cerebral arteries                                   | circulatory system   |
| 480.11 | PRS_PC1 | 0,053  | 0,044 | 1,055 | 0,2216 | 547   | 156471 | Pneumococcal pneumonia                                           | respiratory          |
| 165    | PRS_PC1 | 0,039  | 0,032 | 1,040 | 0,2217 | 1037  | 155981 | Cancer within the respiratory system                             | neoplasms            |
| 574.3  | PRS_PC1 | -0,024 | 0,020 | 0,977 | 0,2274 | 2724  | 154294 | Cholecystitis without cholelithiasis                             | digestive            |
| 448    | PRS_PC1 | 0,030  | 0,025 | 1,031 | 0,2276 | 1647  | 155371 | Disease of capillaries                                           | circulatory system   |
| 555    | PRS_PC1 | 0,021  | 0,018 | 1,021 | 0,2317 | 3403  | 153615 | Inflammatory bowel disease and other gastroenteritis and colitis | digestive            |
| 740    | PRS_PC1 | -0,013 | 0,011 | 0,987 | 0,2318 | 10190 | 146828 | Osteoarthritis                                                   | musculoskeletal      |
| 740.1  | PRS_PC1 | -0,013 | 0,011 | 0,987 | 0,2318 | 10190 | 146828 | Osteoarthritis; localized                                        | musculoskeletal      |
| 349    | PRS_PC1 | 0,037  | 0,031 | 1,038 | 0,2349 | 1065  | 155953 | Other and unspecified disorders of the nervous system            | neurological         |
| 475    | PRS_PC1 | 0,015  | 0,013 | 1,015 | 0,2351 | 6696  | 150322 | Chronic sinusitis                                                | respiratory          |
| 459    | PRS_PC1 | -0,067 | 0,056 | 0,935 | 0,2354 | 327   | 156691 | Other disorders of circulatory system                            | circulatory system   |
| 459.9  | PRS_PC1 | -0,067 | 0,056 | 0,935 | 0,2354 | 327   | 156691 | Circulatory disease NEC                                          | circulatory system   |
| 134    | PRS_PC1 | 0,046  | 0,039 | 1,047 | 0,2356 | 686   | 156332 | Helminthiasis                                                    | infectious diseases  |
| 736    | PRS_PC1 | -0,025 | 0,021 | 0,975 | 0,2361 | 2347  | 154671 | Other acquired deformities of limbs                              | musculoskeletal      |
| 384.4  | PRS_PC1 | 0,037  | 0,031 | 1,037 | 0,2385 | 1077  | 155941 | Perforation of tympanic membrane                                 | sense organs         |
| 134.1  | PRS_PC1 | 0,050  | 0,043 | 1,052 | 0,2414 | 564   | 156454 | Intestinal helminthiasis                                         | infectious diseases  |

|        |         |        |       |       |        |       |        |                                                                    |                         |
|--------|---------|--------|-------|-------|--------|-------|--------|--------------------------------------------------------------------|-------------------------|
| 451    | PRS_PC1 | 0,014  | 0,012 | 1,014 | 0,2427 | 7921  | 149097 | Phlebitis and thrombophlebitis                                     | circulatory system      |
| 370    | PRS_PC1 | 0,037  | 0,032 | 1,038 | 0,2436 | 1038  | 155980 | Keratitis                                                          | sense organs            |
| 286.6  | PRS_PC1 | 0,035  | 0,030 | 1,036 | 0,2438 | 1134  | 155884 | Defibrination syndrome                                             | hematopoietic           |
| 363    | PRS_PC1 | -0,058 | 0,050 | 0,944 | 0,2451 | 417   | 156601 | Chorioretinal inflammations, scars, and other disorders of choroid | sense organs            |
| 480.1  | PRS_PC1 | 0,047  | 0,041 | 1,048 | 0,2453 | 633   | 156385 | Bacterial pneumonia                                                | respiratory             |
| 041.2  | PRS_PC1 | -0,035 | 0,030 | 0,966 | 0,2454 | 1151  | 155867 | Streptococcus infection                                            | infectious diseases     |
| 079.1  | PRS_PC1 | -0,017 | 0,015 | 0,983 | 0,2486 | 5044  | 151974 | Varicella infection                                                | infectious diseases     |
| 604    | PRS_PC1 | -0,029 | 0,025 | 0,972 | 0,2513 | 1670  | 155348 | Disorders of penis                                                 | genitourinary           |
| 604.1  | PRS_PC1 | -0,029 | 0,025 | 0,972 | 0,2513 | 1670  | 155348 | Redundant prepuce and phimosis/BXO                                 | genitourinary           |
| 411    | PRS_PC1 | -0,009 | 0,008 | 0,991 | 0,2522 | 21093 | 135925 | Ischemic Heart Disease                                             | circulatory system      |
| 008.6  | PRS_PC1 | 0,021  | 0,018 | 1,021 | 0,2540 | 3263  | 153755 | Viral Enteritis                                                    | infectious diseases     |
| 345    | PRS_PC1 | 0,021  | 0,019 | 1,022 | 0,2557 | 2995  | 154023 | Epilepsy, recurrent seizures, convulsions                          | neurological            |
| 172.1  | PRS_PC1 | -0,026 | 0,023 | 0,974 | 0,2577 | 1953  | 155065 | Melanomas of skin, dx or hx                                        | neoplasms               |
| 172.11 | PRS_PC1 | -0,026 | 0,023 | 0,974 | 0,2577 | 1953  | 155065 | Melanomas of skin                                                  | neoplasms               |
| 531    | PRS_PC1 | 0,013  | 0,011 | 1,013 | 0,2580 | 8612  | 148406 | Peptic ulcer (excl. esophageal)                                    | digestive               |
| 395.1  | PRS_PC1 | -0,024 | 0,021 | 0,976 | 0,2596 | 2367  | 154651 | Nonrheumatic mitral valve disorders                                | circulatory system      |
| 277    | PRS_PC1 | -0,037 | 0,033 | 0,963 | 0,2630 | 938   | 156080 | Other disorders of metabolism                                      | endocrine/metabolic     |
| 636    | PRS_PC1 | 0,030  | 0,027 | 1,031 | 0,2674 | 1499  | 155519 | Early or threatened labor; hemorrhage in early pregnancy           | pregnancy complications |
| 728.7  | PRS_PC1 | -0,010 | 0,009 | 0,990 | 0,2675 | 15309 | 141709 | Fasciitis                                                          | musculoskeletal         |

|       |         |        |       |       |        |       |        |                              |                      |
|-------|---------|--------|-------|-------|--------|-------|--------|------------------------------|----------------------|
|       |         |        |       |       |        |       |        | Nephritis; nephrosis; renal  |                      |
| 580   | PRS_PC1 | 0,035  | 0,032 | 1,036 | 0,2693 | 1011  | 156007 | sclerosis                    | genitourinary        |
| 189.2 | PRS_PC1 | -0,033 | 0,030 | 0,967 | 0,2700 | 1158  | 155860 | Cancer of bladder            | neoplasms            |
|       |         |        |       |       |        |       |        | Other and unspecified        |                      |
| 286.7 | PRS_PC1 | 0,034  | 0,031 | 1,034 | 0,2722 | 1113  | 155905 | coagulation defects          | hematopoietic        |
| 374   | PRS_PC1 | -0,015 | 0,014 | 0,985 | 0,2778 | 5846  | 151172 | Other disorders of eyelids   | sense organs         |
| 555.2 | PRS_PC1 | 0,022  | 0,021 | 1,022 | 0,2818 | 2498  | 154520 | Ulcerative colitis           | digestive            |
| 8     | PRS_PC1 | 0,010  | 0,009 | 1,010 | 0,2825 | 13338 | 143680 | Intestinal infection         | infectious diseases  |
|       |         |        |       |       |        |       |        | Pulmonary congestion and     |                      |
| 503   | PRS_PC1 | 0,053  | 0,050 | 1,055 | 0,2831 | 422   | 156596 | hypostasis                   | respiratory          |
| 464   | PRS_PC1 | 0,009  | 0,008 | 1,009 | 0,2847 | 17867 | 139151 | Acute sinusitis              | respiratory          |
|       |         |        |       |       |        |       |        | Congenital anomalies of      |                      |
| 751.2 | PRS_PC1 | 0,037  | 0,035 | 1,038 | 0,2862 | 845   | 156173 | urinary system               | congenital anomalies |
| 185   | PRS_PC1 | -0,018 | 0,017 | 0,982 | 0,2862 | 3755  | 153263 | Cancer of prostate           | neoplasms            |
|       |         |        |       |       |        |       |        | Cancer of other male genital |                      |
| 187   | PRS_PC1 | 0,052  | 0,049 | 1,054 | 0,2868 | 428   | 156590 | organs                       | neoplasms            |
|       |         |        |       |       |        |       |        | Congenital anomalies of face |                      |
| 749   | PRS_PC1 | 0,051  | 0,048 | 1,052 | 0,2870 | 459   | 156559 | and neck                     | congenital anomalies |
| 10    | PRS_PC1 | 0,051  | 0,048 | 1,052 | 0,2872 | 458   | 156560 | Tuberculosis                 | infectious diseases  |
| 371   | PRS_PC1 | 0,015  | 0,015 | 1,016 | 0,2902 | 5107  | 151911 | Inflammation of the eye      | sense organs         |
| 180.1 | PRS_PC1 | 0,058  | 0,055 | 1,060 | 0,2925 | 339   | 156679 | Cervical cancer              | neoplasms            |
|       |         |        |       |       |        |       |        | Benign neoplasm of brain     |                      |
| 225   | PRS_PC1 | 0,059  | 0,056 | 1,061 | 0,2926 | 333   | 156685 | and other parts of nervous   |                      |
| 365   | PRS_PC1 | -0,013 | 0,012 | 0,987 | 0,2929 | 7220  | 149798 | system                       | neoplasms            |
| 594   | PRS_PC1 | -0,014 | 0,013 | 0,986 | 0,2942 | 6179  | 150839 | Glaucoma                     | sense organs         |
| 535   | PRS_PC1 | 0,008  | 0,007 | 1,008 | 0,2948 | 23273 | 133745 | Urinary calculus             | genitourinary        |
|       |         |        |       |       |        |       |        | Gastritis and duodenitis     | digestive            |
|       |         |        |       |       |        |       |        | Diseases of hair and hair    |                      |
| 704   | PRS_PC1 | 0,038  | 0,037 | 1,039 | 0,2949 | 778   | 156240 | follicles                    | dermatologic         |

|        |         |        |       |       |        |       |        |                                                                           |                      |
|--------|---------|--------|-------|-------|--------|-------|--------|---------------------------------------------------------------------------|----------------------|
| 189    | PRS_PC1 | -0,025 | 0,025 | 0,975 | 0,3014 | 1746  | 155272 | Cancer of urinary organs<br>(incl. kidney and bladder)                    | neoplasms            |
| 288.2  | PRS_PC1 | 0,040  | 0,039 | 1,041 | 0,3030 | 687   | 156331 | Elevated white blood cell<br>count                                        | hematopoietic        |
| 507    | PRS_PC1 | 0,014  | 0,014 | 1,014 | 0,3052 | 5582  | 151436 | Pleurisy; pleural effusion                                                | respiratory          |
| 452    | PRS_PC1 | -0,041 | 0,040 | 0,960 | 0,3095 | 640   | 156378 | Other venous embolism and<br>thrombosis                                   | circulatory system   |
| 117    | PRS_PC1 | -0,050 | 0,049 | 0,951 | 0,3115 | 425   | 156593 | Mycoses                                                                   | infectious diseases  |
| 187.2  | PRS_PC1 | 0,062  | 0,062 | 1,064 | 0,3138 | 273   | 156745 | Malignant neoplasm of<br>testis                                           | neoplasms            |
| 721    | PRS_PC1 | 0,008  | 0,008 | 1,008 | 0,3228 | 17272 | 139746 | Spondylosis and allied<br>disorders                                       | musculoskeletal      |
| 395    | PRS_PC1 | -0,015 | 0,015 | 0,986 | 0,3263 | 4933  | 152085 | Heart valve disorders                                                     | circulatory system   |
| 750.21 | PRS_PC1 | 0,064  | 0,065 | 1,066 | 0,3270 | 243   | 156775 | Congenital anomalies of<br>intestine                                      | congenital anomalies |
| 288    | PRS_PC1 | 0,038  | 0,038 | 1,038 | 0,3281 | 701   | 156317 | Diseases of white blood cells                                             | hematopoietic        |
| 585.2  | PRS_PC1 | -0,028 | 0,028 | 0,973 | 0,3284 | 1309  | 155709 | Renal failure NOS                                                         | genitourinary        |
| 626.8  | PRS_PC1 | -0,022 | 0,022 | 0,979 | 0,3317 | 2134  | 154884 | Infertility, female                                                       | genitourinary        |
| 619.3  | PRS_PC1 | 0,032  | 0,033 | 1,032 | 0,3323 | 972   | 156046 | Noninflammatory disorders<br>of cervix                                    | genitourinary        |
| 394.2  | PRS_PC1 | 0,055  | 0,057 | 1,056 | 0,3327 | 325   | 156693 | Mitral valve disease                                                      | circulatory system   |
| 465    | PRS_PC1 | 0,006  | 0,006 | 1,006 | 0,3327 | 47477 | 109541 | Acute upper respiratory<br>infections of multiple or<br>unspecified sites | respiratory          |
| 751.21 | PRS_PC1 | 0,049  | 0,050 | 1,050 | 0,3328 | 407   | 156611 | Cystic kidney disease                                                     | congenital anomalies |
| 690    | PRS_PC1 | 0,012  | 0,013 | 1,012 | 0,3371 | 6920  | 150098 | Erythemasquamous<br>dermatosis                                            | dermatologic         |
| 690.1  | PRS_PC1 | 0,012  | 0,013 | 1,012 | 0,3371 | 6920  | 150098 | Seborrheic dermatitis                                                     | dermatologic         |
| 704.1  | PRS_PC1 | 0,035  | 0,037 | 1,035 | 0,3493 | 753   | 156265 | Alopecia                                                                  | dermatologic         |

|        |         |        |       |       |        |       |        |                                |                      |
|--------|---------|--------|-------|-------|--------|-------|--------|--------------------------------|----------------------|
|        |         |        |       |       |        |       |        | Other local infections of skin |                      |
| 686    | PRS_PC1 | 0,010  | 0,010 | 1,010 | 0,3565 | 10242 | 146776 | and subcutaneous tissue        | dermatologic         |
| 704.11 | PRS_PC1 | 0,040  | 0,043 | 1,040 | 0,3590 | 558   | 156460 | Alopecia Areata                | dermatologic         |
| 715.2  | PRS_PC1 | 0,034  | 0,037 | 1,034 | 0,3599 | 766   | 156252 | Ankylosing spondylitis         | musculoskeletal      |
|        |         |        |       |       |        |       |        | Nystagmus and other            |                      |
| 378.2  | PRS_PC1 | -0,059 | 0,065 | 0,942 | 0,3624 | 244   | 156774 | irregular eye movements        | sense organs         |
| 732    | PRS_PC1 | -0,036 | 0,040 | 0,964 | 0,3628 | 654   | 156364 | Osteochondropathies            | musculoskeletal      |
|        |         |        |       |       |        |       |        | Nervous system congenital      |                      |
| 752    | PRS_PC1 | 0,055  | 0,061 | 1,057 | 0,3631 | 281   | 156737 | anomalies                      | congenital anomalies |
| 458    | PRS_PC1 | -0,012 | 0,013 | 0,988 | 0,3631 | 6608  | 150410 | Hypotension                    | circulatory system   |
| 458.9  | PRS_PC1 | -0,012 | 0,013 | 0,988 | 0,3631 | 6608  | 150410 | Hypotension NOS                | circulatory system   |
|        |         |        |       |       |        |       |        | Other inflammatory             |                      |
| 715    | PRS_PC1 | 0,017  | 0,019 | 1,017 | 0,3642 | 2902  | 154116 | spondylopathies                | musculoskeletal      |
|        |         |        |       |       |        |       |        | Pruritus and related           |                      |
| 698    | PRS_PC1 | -0,010 | 0,011 | 0,990 | 0,3754 | 8583  | 148435 | conditions                     | dermatologic         |
| 705    | PRS_PC1 | -0,031 | 0,035 | 0,969 | 0,3764 | 829   | 156189 | Disorders of sweat glands      | dermatologic         |
|        |         |        |       |       |        |       |        | Vertiginous syndromes and      |                      |
|        |         |        |       |       |        |       |        | other disorders of vestibular  |                      |
| 386    | PRS_PC1 | -0,010 | 0,012 | 0,990 | 0,3774 | 7976  | 149042 | system                         | sense organs         |
| 474    | PRS_PC1 | -0,009 | 0,011 | 0,991 | 0,3788 | 10059 | 146959 | Acute and chronic tonsillitis  | respiratory          |
| 947    | PRS_PC1 | -0,011 | 0,012 | 0,989 | 0,3794 | 7462  | 149556 | Urticaria                      | dermatologic         |
|        |         |        |       |       |        |       |        | Retinal vascular changes and   |                      |
| 362.4  | PRS_PC1 | -0,025 | 0,029 | 0,975 | 0,3807 | 1241  | 155777 | abnormalities                  | sense organs         |
|        |         |        |       |       |        |       |        | Disorders of menstruation      |                      |
|        |         |        |       |       |        |       |        | and other abnormal bleeding    |                      |
| 626    | PRS_PC1 | -0,015 | 0,017 | 0,985 | 0,3812 | 3624  | 153394 | from female genital tract      | genitourinary        |
|        |         |        |       |       |        |       |        | Trigeminal nerve disorders     |                      |
| 352.1  | PRS_PC1 | -0,020 | 0,023 | 0,980 | 0,3837 | 1931  | 155087 | [CN5]                          | neurological         |

|        |         |        |       |       |        |       |        |                             |                         |
|--------|---------|--------|-------|-------|--------|-------|--------|-----------------------------|-------------------------|
| 157    | PRS_PC1 | 0,054  | 0,062 | 1,056 | 0,3852 | 267   | 156751 | Pancreatic cancer           | neoplasms               |
|        |         |        |       |       |        |       |        | Dermatophytosis /           |                         |
| 110    | PRS_PC1 | 0,006  | 0,007 | 1,006 | 0,3858 | 25076 | 131942 | Dermatomycosis              | infectious diseases     |
| 495.2  | PRS_PC1 | 0,056  | 0,065 | 1,058 | 0,3886 | 245   | 156773 | Asthma with exacerbation    | respiratory             |
| 256    | PRS_PC1 | -0,026 | 0,031 | 0,974 | 0,3914 | 1111  | 155907 | Ovarian dysfunction         | endocrine/metabolic     |
|        |         |        |       |       |        |       |        | Other cerebral              |                         |
| 331    | PRS_PC1 | 0,042  | 0,050 | 1,043 | 0,3929 | 423   | 156595 | degenerations               | neurological            |
|        |         |        |       |       |        |       |        | Diseases of the larynx and  |                         |
| 473    | PRS_PC1 | 0,046  | 0,054 | 1,047 | 0,3967 | 360   | 156658 | vocal cords                 | respiratory             |
| 473.1  | PRS_PC1 | 0,046  | 0,054 | 1,047 | 0,3967 | 360   | 156658 | Chronic laryngitis          | respiratory             |
| 246    | PRS_PC1 | 0,028  | 0,034 | 1,029 | 0,4029 | 921   | 156097 | Other disorders of thyroid  | endocrine/metabolic     |
|        |         |        |       |       |        |       |        | Malignant neoplasm of       |                         |
| 174.11 | PRS_PC1 | -0,012 | 0,014 | 0,988 | 0,4050 | 5617  | 151401 | female breast               | neoplasms               |
| 651    | PRS_PC1 | 0,046  | 0,056 | 1,047 | 0,4060 | 338   | 156680 | Multiple gestation          | pregnancy complications |
|        |         |        |       |       |        |       |        | Disorders of fluid,         |                         |
|        |         |        |       |       |        |       |        | electrolyte, and acid-base  |                         |
| 276    | PRS_PC1 | 0,016  | 0,019 | 1,016 | 0,4069 | 2995  | 154023 | balance                     | endocrine/metabolic     |
| 276.5  | PRS_PC1 | 0,016  | 0,019 | 1,016 | 0,4069 | 2995  | 154023 | Hypovolemia                 | endocrine/metabolic     |
|        |         |        |       |       |        |       |        | Other specified benign      |                         |
| 610.8  | PRS_PC1 | 0,011  | 0,013 | 1,011 | 0,4082 | 6388  | 150630 | mammary dysplasias          | genitourinary           |
| 496.3  | PRS_PC1 | 0,018  | 0,022 | 1,019 | 0,4120 | 2109  | 154909 | Bronchiectasis              | respiratory             |
|        |         |        |       |       |        |       |        | Nephritis and nephropathy   |                         |
|        |         |        |       |       |        |       |        | without mention of          |                         |
| 580.3  | PRS_PC1 | 0,034  | 0,042 | 1,035 | 0,4121 | 599   | 156419 | glomerulonephritis          | genitourinary           |
| 289.4  | PRS_PC1 | 0,030  | 0,037 | 1,030 | 0,4169 | 771   | 156247 | Lymphadenitis               | hematopoietic           |
|        |         |        |       |       |        |       |        | Other disorders of tympanic |                         |
| 384    | PRS_PC1 | 0,022  | 0,028 | 1,022 | 0,4214 | 1376  | 155642 | membrane                    | sense organs            |
| 145    | PRS_PC1 | 0,045  | 0,056 | 1,046 | 0,4220 | 333   | 156685 | Cancer of mouth             | neoplasms               |
| 550.1  | PRS_PC1 | 0,008  | 0,010 | 1,008 | 0,4270 | 12751 | 144267 | Inguinal hernia             | digestive               |

|        |         |        |       |       |        |       |        |                              |                      |
|--------|---------|--------|-------|-------|--------|-------|--------|------------------------------|----------------------|
|        |         |        |       |       |        |       |        | Hypertensive chronic kidney  |                      |
| 401.22 | PRS_PC1 | -0,031 | 0,039 | 0,970 | 0,4273 | 701   | 156317 | disease                      | circulatory system   |
| 378.5  | PRS_PC1 | 0,042  | 0,053 | 1,043 | 0,4281 | 363   | 156655 | Paralytic strabismus         | sense organs         |
| 352.2  | PRS_PC1 | 0,019  | 0,024 | 1,020 | 0,4285 | 1750  | 155268 | Facial nerve disorders [CN7] | neurological         |
| 193    | PRS_PC1 | -0,048 | 0,062 | 0,953 | 0,4366 | 268   | 156750 | Thyroid cancer               | neoplasms            |
| 331.1  | PRS_PC1 | 0,040  | 0,052 | 1,041 | 0,4381 | 385   | 156633 | Hydrocephalus                | neurological         |
|        |         |        |       |       |        |       |        | Congenital deformities of    |                      |
| 755.1  | PRS_PC1 | 0,030  | 0,039 | 1,031 | 0,4386 | 683   | 156335 | feet                         | congenital anomalies |
|        |         |        |       |       |        |       |        | Other disorders of stomach   |                      |
| 537    | PRS_PC1 | -0,010 | 0,013 | 0,990 | 0,4407 | 6495  | 150523 | and duodenum                 | digestive            |
| 706.2  | PRS_PC1 | 0,009  | 0,012 | 1,009 | 0,4411 | 7374  | 149644 | Sebaceous cyst               | dermatologic         |
|        |         |        |       |       |        |       |        | Malignant neoplasm of other  |                      |
|        |         |        |       |       |        |       |        | and ill-defined sites within |                      |
|        |         |        |       |       |        |       |        | the digestive organs and     |                      |
| 159    | PRS_PC1 | -0,049 | 0,063 | 0,952 | 0,4419 | 259   | 156759 | peritoneum                   | neoplasms            |
| 54     | PRS_PC1 | 0,014  | 0,018 | 1,014 | 0,4440 | 3344  | 153674 | Herpes simplex               | infectious diseases  |
|        |         |        |       |       |        |       |        | Late effects of              |                      |
| 433.8  | PRS_PC1 | 0,024  | 0,033 | 1,025 | 0,4550 | 978   | 156040 | cerebrovascular disease      | circulatory system   |
| 696.3  | PRS_PC1 | 0,022  | 0,030 | 1,023 | 0,4627 | 1135  | 155883 | Pityriasis                   | dermatologic         |
|        |         |        |       |       |        |       |        | Intestinal malabsorption     |                      |
| 557    | PRS_PC1 | 0,016  | 0,023 | 1,016 | 0,4677 | 2072  | 154946 | (non-celiac)                 | digestive            |
| 601.3  | PRS_PC1 | -0,018 | 0,026 | 0,982 | 0,4711 | 1634  | 155384 | Orchitis and epididymitis    | genitourinary        |
| 474.1  | PRS_PC1 | -0,008 | 0,011 | 0,992 | 0,4713 | 9154  | 147864 | Acute tonsillitis            | respiratory          |
| 153.2  | PRS_PC1 | 0,019  | 0,026 | 1,019 | 0,4729 | 1517  | 155501 | Colon cancer                 | neoplasms            |
|        |         |        |       |       |        |       |        | Aphakia and other disorders  |                      |
| 379.3  | PRS_PC1 | -0,049 | 0,070 | 0,952 | 0,4804 | 211   | 156807 | of lens                      | sense organs         |
|        |         |        |       |       |        |       |        | Other chronic ischemic heart |                      |
| 411.8  | PRS_PC1 | -0,006 | 0,009 | 0,994 | 0,4810 | 17113 | 139905 | disease, unspecified         | circulatory system   |
|        |         |        |       |       |        |       |        | Diseases of the salivary     |                      |
| 527    | PRS_PC1 | 0,016  | 0,023 | 1,016 | 0,4832 | 2006  | 155012 | glands                       | digestive            |

|        |         |        |       |       |        |       |        |                                                                           |                         |
|--------|---------|--------|-------|-------|--------|-------|--------|---------------------------------------------------------------------------|-------------------------|
| 225.1  | PRS_PC1 | 0,042  | 0,059 | 1,042 | 0,4832 | 295   | 156723 | Benign neoplasm of brain,<br>cranial nerves, meninges                     | neoplasms               |
| 401.2  | PRS_PC1 | -0,023 | 0,034 | 0,978 | 0,5021 | 930   | 156088 | Hypertensive heart and/or<br>renal disease                                | circulatory system      |
| 383    | PRS_PC1 | -0,030 | 0,044 | 0,971 | 0,5024 | 530   | 156488 | Otosclerosis                                                              | sense organs            |
| 531.3  | PRS_PC1 | 0,010  | 0,016 | 1,011 | 0,5033 | 4394  | 152624 | Duodenal ulcer                                                            | digestive               |
| 362    | PRS_PC1 | -0,008 | 0,012 | 0,992 | 0,5036 | 8194  | 148824 | Other retinal disorders                                                   | sense organs            |
| 191.1  | PRS_PC1 | -0,045 | 0,068 | 0,956 | 0,5042 | 224   | 156794 | Cancer of brain and nervous<br>system                                     | neoplasms               |
| 184    | PRS_PC1 | -0,025 | 0,037 | 0,976 | 0,5048 | 773   | 156245 | Cancer of other female<br>genital organs                                  | neoplasms               |
| 38     | PRS_PC1 | -0,043 | 0,064 | 0,958 | 0,5051 | 253   | 156765 | Septicemia                                                                | infectious diseases     |
| 038.1  | PRS_PC1 | -0,043 | 0,064 | 0,958 | 0,5051 | 253   | 156765 | Gram negative septicemia                                                  | infectious diseases     |
| 751.12 | PRS_PC1 | -0,034 | 0,051 | 0,967 | 0,5052 | 399   | 156619 | Congenital anomalies of<br>male genital organs                            | congenital anomalies    |
| 110.2  | PRS_PC1 | 0,011  | 0,017 | 1,011 | 0,5056 | 3857  | 153161 | Dermatomycoses                                                            | infectious diseases     |
| 133    | PRS_PC1 | 0,041  | 0,062 | 1,042 | 0,5074 | 266   | 156752 | Arthropod-borne diseases                                                  | infectious diseases     |
| 275    | PRS_PC1 | -0,013 | 0,020 | 0,987 | 0,5079 | 2676  | 154342 | Disorders of mineral<br>metabolism                                        | endocrine/metabolic     |
| 480.2  | PRS_PC1 | 0,039  | 0,059 | 1,040 | 0,5083 | 298   | 156720 | Viral pneumonia                                                           | respiratory             |
| 379.5  | PRS_PC1 | 0,030  | 0,046 | 1,030 | 0,5178 | 489   | 156529 | Disorders of iris and ciliary<br>body                                     | sense organs            |
| 530.1  | PRS_PC1 | 0,004  | 0,006 | 1,004 | 0,5204 | 33500 | 123518 | Esophagitis, GERD and<br>related diseases                                 | digestive               |
| 376    | PRS_PC1 | -0,026 | 0,040 | 0,975 | 0,5217 | 640   | 156378 | Disorders of the orbit                                                    | sense organs            |
| 642    | PRS_PC1 | -0,025 | 0,038 | 0,976 | 0,5218 | 710   | 156308 | Hypertension complicating<br>pregnancy, childbirth, and<br>the puerperium | pregnancy complications |
| 189.21 | PRS_PC1 | -0,028 | 0,044 | 0,972 | 0,5224 | 530   | 156488 | Malignant neoplasm of<br>bladder                                          | neoplasms               |



|        |         |        |       |       |        |       |        |                                                               |                         |
|--------|---------|--------|-------|-------|--------|-------|--------|---------------------------------------------------------------|-------------------------|
| 555.1  | PRS_PC1 | 0,018  | 0,028 | 1,018 | 0,5327 | 1295  | 155723 | Regional enteritis                                            | digestive               |
| 450    | PRS_PC1 | -0,019 | 0,031 | 0,981 | 0,5390 | 1096  | 155922 | Noninfectious disorders of lymphatic channels                 | circulatory system      |
| 277.2  | PRS_PC1 | -0,032 | 0,053 | 0,968 | 0,5394 | 372   | 156646 | Other disorders of purine and pyrimidine metabolism           | endocrine/metabolic     |
| 204    | PRS_PC1 | -0,023 | 0,037 | 0,978 | 0,5404 | 761   | 156257 | Leukemia                                                      | neoplasms               |
| 530    | PRS_PC1 | 0,004  | 0,006 | 1,004 | 0,5423 | 33709 | 123309 | Diseases of esophagus                                         | digestive               |
| 202.24 | PRS_PC1 | 0,035  | 0,058 | 1,036 | 0,5440 | 304   | 156714 | Large cell lymphoma                                           | neoplasms               |
| 359    | PRS_PC1 | -0,033 | 0,055 | 0,968 | 0,5461 | 348   | 156670 | Muscular dystrophies and other myopathies                     | neurological            |
| 359.2  | PRS_PC1 | -0,033 | 0,055 | 0,968 | 0,5461 | 348   | 156670 | Myopathy                                                      | neurological            |
| 703    | PRS_PC1 | -0,007 | 0,012 | 0,993 | 0,5503 | 7691  | 149327 | Diseases of nail, NOS                                         | dermatologic            |
| 751.1  | PRS_PC1 | -0,024 | 0,041 | 0,976 | 0,5541 | 618   | 156400 | Congenital anomalies of genital organs                        | congenital anomalies    |
| 474.2  | PRS_PC1 | 0,021  | 0,036 | 1,022 | 0,5556 | 790   | 156228 | Chronic tonsillitis and adenoiditis                           | respiratory             |
| 427.4  | PRS_PC1 | -0,020 | 0,034 | 0,980 | 0,5565 | 902   | 156116 | Cardiac arrest and ventricular fibrillation                   | circulatory system      |
| 427.42 | PRS_PC1 | -0,020 | 0,034 | 0,980 | 0,5565 | 902   | 156116 | Cardiac arrest                                                | circulatory system      |
| 479    | PRS_PC1 | 0,021  | 0,035 | 1,021 | 0,5569 | 840   | 156178 | Other upper respiratory disease                               | respiratory             |
| 41     | PRS_PC1 | -0,010 | 0,018 | 0,990 | 0,5570 | 3371  | 153647 | Bacterial infection NOS                                       | infectious diseases     |
| 041.21 | PRS_PC1 | -0,024 | 0,041 | 0,977 | 0,5645 | 626   | 156392 | Rheumatic fever / chorea                                      | infectious diseases     |
| 649.1  | PRS_PC1 | -0,034 | 0,062 | 0,966 | 0,5791 | 273   | 156745 | Diabetes or abnormal glucose tolerance complicating pregnancy | pregnancy complications |
| 333    | PRS_PC1 | 0,009  | 0,017 | 1,009 | 0,5800 | 3830  | 153188 | Extrapyramidal disease and abnormal movement disorders        | neurological            |
| 257    | PRS_PC1 | -0,033 | 0,059 | 0,968 | 0,5830 | 294   | 156724 | Testicular dysfunction                                        | endocrine/metabolic     |

|        |         |        |       |       |        |       |        |                                                                 |                      |
|--------|---------|--------|-------|-------|--------|-------|--------|-----------------------------------------------------------------|----------------------|
| 614.3  | PRS_PC1 | -0,025 | 0,046 | 0,975 | 0,5836 | 483   | 156535 | Pelvic inflammatory disease (PID)                               | genitourinary        |
| 710    | PRS_PC1 | 0,017  | 0,030 | 1,017 | 0,5864 | 1127  | 155891 | Osteomyelitis, periostitis, and other infections involving bone | musculoskeletal      |
| 710.1  | PRS_PC1 | 0,017  | 0,030 | 1,017 | 0,5864 | 1127  | 155891 | Osteomyelitis                                                   | musculoskeletal      |
| 710.19 | PRS_PC1 | 0,017  | 0,030 | 1,017 | 0,5864 | 1127  | 155891 | Unspecified osteomyelitis                                       | musculoskeletal      |
| 381.2  | PRS_PC1 | -0,009 | 0,017 | 0,991 | 0,5883 | 3568  | 153450 | Eustachian tube disorders                                       | sense organs         |
| 770    | PRS_PC1 | -0,036 | 0,068 | 0,964 | 0,5947 | 223   | 156795 | Myalgia and myositis unspecified                                | symptoms             |
| 281.13 | PRS_PC1 | 0,029  | 0,056 | 1,029 | 0,6024 | 334   | 156684 | Folate-deficiency anemia                                        | hematopoietic        |
| 751    | PRS_PC1 | 0,013  | 0,026 | 1,014 | 0,6074 | 1519  | 155499 | Genitourinary congenital anomalies                              | congenital anomalies |
| 420.3  | PRS_PC1 | -0,023 | 0,045 | 0,977 | 0,6088 | 510   | 156508 | Endocarditis                                                    | circulatory system   |
| 395.4  | PRS_PC1 | -0,034 | 0,067 | 0,966 | 0,6112 | 228   | 156790 | Nonrheumatic pulmonary valve disorders                          | circulatory system   |
| 110.1  | PRS_PC1 | 0,004  | 0,007 | 1,004 | 0,6183 | 22506 | 134512 | Dermatophytosis                                                 | infectious diseases  |
| 681    | PRS_PC1 | -0,004 | 0,008 | 0,996 | 0,6189 | 18135 | 138883 | Superficial cellulitis and abscess                              | dermatologic         |
| 288.1  | PRS_PC1 | -0,010 | 0,020 | 0,990 | 0,6252 | 2609  | 154409 | Decreased white blood cell count                                | hematopoietic        |
| 288.11 | PRS_PC1 | -0,010 | 0,020 | 0,990 | 0,6252 | 2609  | 154409 | Neutropenia                                                     | hematopoietic        |
| 320    | PRS_PC1 | -0,015 | 0,031 | 0,985 | 0,6259 | 1110  | 155908 | Meningitis                                                      | neurological         |
| 577    | PRS_PC1 | 0,012  | 0,025 | 1,012 | 0,6273 | 1673  | 155345 | Diseases of pancreas                                            | digestive            |
| 577.1  | PRS_PC1 | 0,012  | 0,025 | 1,012 | 0,6273 | 1673  | 155345 | Acute pancreatitis                                              | digestive            |
| 757    | PRS_PC1 | 0,014  | 0,030 | 1,014 | 0,6283 | 1195  | 155823 | Congenital anomalies of the integument                          | congenital anomalies |
| 204.12 | PRS_PC1 | -0,032 | 0,066 | 0,969 | 0,6290 | 241   | 156777 | Lymphoid leukemia, chronic                                      | neoplasms            |
| 747.1  | PRS_PC1 | 0,015  | 0,031 | 1,015 | 0,6303 | 1052  | 155966 | Cardiac congenital anomalies                                    | congenital anomalies |

|        |         |        |       |       |        |      |        |                                                        |                         |
|--------|---------|--------|-------|-------|--------|------|--------|--------------------------------------------------------|-------------------------|
| 447    | PRS_PC1 | 0,014  | 0,030 | 1,014 | 0,6359 | 1169 | 155849 | Other disorders of arteries and arterioles             | circulatory system      |
| 90     | PRS_PC1 | 0,033  | 0,070 | 1,034 | 0,6365 | 208  | 156810 | Sexually transmitted infections (not HIV or hepatitis) | infectious diseases     |
| 281.12 | PRS_PC1 | 0,012  | 0,025 | 1,012 | 0,6404 | 1650 | 155368 | Other vitamin B12 deficiency anemia                    | hematopoietic           |
| 174    | PRS_PC1 | -0,006 | 0,013 | 0,994 | 0,6405 | 6470 | 150548 | Breast cancer                                          | neoplasms               |
| 634.3  | PRS_PC1 | 0,017  | 0,037 | 1,017 | 0,6430 | 766  | 156252 | Ectopic pregnancy                                      | pregnancy complications |
| 420.2  | PRS_PC1 | 0,014  | 0,030 | 1,014 | 0,6456 | 1180 | 155838 | Pericarditis                                           | circulatory system      |
| 656    | PRS_PC1 | 0,032  | 0,071 | 1,033 | 0,6521 | 203  | 156815 | Other perinatal conditions of fetus or newborn         | pregnancy complications |
| 151    | PRS_PC1 | -0,031 | 0,070 | 0,969 | 0,6529 | 213  | 156805 | Cancer of stomach                                      | neoplasms               |
| 182    | PRS_PC1 | 0,017  | 0,038 | 1,017 | 0,6540 | 744  | 156274 | Malignant neoplasm of uterus                           | neoplasms               |
| 191.11 | PRS_PC1 | -0,032 | 0,071 | 0,969 | 0,6558 | 206  | 156812 | Cancer of brain                                        | neoplasms               |
| 281    | PRS_PC1 | 0,010  | 0,023 | 1,010 | 0,6575 | 1947 | 155071 | Other deficiency anemia                                | hematopoietic           |
| 281.1  | PRS_PC1 | 0,010  | 0,023 | 1,010 | 0,6575 | 1947 | 155071 | Megaloblastic anemia                                   | hematopoietic           |
| 385.3  | PRS_PC1 | -0,025 | 0,057 | 0,975 | 0,6577 | 321  | 156697 | Cholesteatoma                                          | sense organs            |
| 204.1  | PRS_PC1 | -0,028 | 0,063 | 0,973 | 0,6586 | 264  | 156754 | Lymphoid leukemia                                      | neoplasms               |
| 344    | PRS_PC1 | 0,017  | 0,039 | 1,017 | 0,6592 | 677  | 156341 | Other paralytic syndromes                              | neurological            |
| 697    | PRS_PC1 | 0,017  | 0,038 | 1,017 | 0,6600 | 717  | 156301 | Sarcoidosis                                            | dermatologic            |
| 531.2  | PRS_PC1 | 0,007  | 0,015 | 1,007 | 0,6601 | 4636 | 152382 | Gastric ulcer                                          | digestive               |
| 425.1  | PRS_PC1 | -0,013 | 0,031 | 0,987 | 0,6686 | 1091 | 155927 | Primary/intrinsic cardiomyopathies                     | circulatory system      |
| 420    | PRS_PC1 | 0,011  | 0,025 | 1,011 | 0,6710 | 1690 | 155328 | Carditis                                               | circulatory system      |
| 415.1  | PRS_PC1 | -0,007 | 0,016 | 0,993 | 0,6717 | 3926 | 153092 | Acute pulmonary heart disease                          | circulatory system      |
| 415.11 | PRS_PC1 | -0,007 | 0,016 | 0,993 | 0,6717 | 3926 | 153092 | Pulmonary embolism and infarction, acute               | circulatory system      |

|        |         |        |       |       |        |       |        |                                                                    |                      |
|--------|---------|--------|-------|-------|--------|-------|--------|--------------------------------------------------------------------|----------------------|
| 184.2  | PRS_PC1 | 0,030  | 0,071 | 1,031 | 0,6727 | 205   | 156813 | Cancer of other female genital organs (excluding uterus and ovary) | neoplasms            |
| 132    | PRS_PC1 | 0,010  | 0,023 | 1,010 | 0,6732 | 2053  | 154965 | Infestation (lice, mites)                                          | infectious diseases  |
| 441    | PRS_PC1 | -0,013 | 0,032 | 0,987 | 0,6778 | 1025  | 155993 | Vascular insufficiency of intestine                                | circulatory system   |
| 751.22 | PRS_PC1 | 0,020  | 0,048 | 1,020 | 0,6795 | 443   | 156575 | Other specified congenital anomalies of kidney                     | congenital anomalies |
| 174.1  | PRS_PC1 | -0,005 | 0,013 | 0,995 | 0,6813 | 6446  | 150572 | Breast cancer [female]                                             | neoplasms            |
| 704.2  | PRS_PC1 | 0,023  | 0,056 | 1,023 | 0,6831 | 328   | 156690 | Hirsutism                                                          | dermatologic         |
| 580.14 | PRS_PC1 | 0,020  | 0,050 | 1,021 | 0,6834 | 414   | 156604 | Chronic glomerulonephritis, NOS                                    | genitourinary        |
| 427    | PRS_PC1 | 0,004  | 0,009 | 1,004 | 0,6838 | 14918 | 142100 | Cardiac dysrhythmias                                               | circulatory system   |
| 70     | PRS_PC1 | 0,017  | 0,041 | 1,017 | 0,6852 | 622   | 156396 | Viral hepatitis                                                    | infectious diseases  |
| 529    | PRS_PC1 | -0,009 | 0,022 | 0,991 | 0,6877 | 2087  | 154931 | Diseases and other conditions of the tongue                        | digestive            |
| 427.2  | PRS_PC1 | 0,004  | 0,010 | 1,004 | 0,6879 | 12652 | 144366 | Atrial fibrillation and flutter                                    | circulatory system   |
| 512    | PRS_PC1 | 0,004  | 0,011 | 1,004 | 0,6889 | 9656  | 147362 | Other symptoms of respiratory system                               | respiratory          |
| 550.5  | PRS_PC1 | 0,007  | 0,018 | 1,007 | 0,6919 | 3175  | 153843 | Ventral hernia                                                     | digestive            |
| 442    | PRS_PC1 | -0,017 | 0,042 | 0,983 | 0,6926 | 586   | 156432 | Other aneurysm                                                     | circulatory system   |
| 334    | PRS_PC1 | -0,013 | 0,033 | 0,987 | 0,6939 | 942   | 156076 | Degenerative disease of the spinal cord                            | neurological         |
| 427.1  | PRS_PC1 | 0,007  | 0,018 | 1,007 | 0,6978 | 3116  | 153902 | Paroxysmal tachycardia, unspecified                                | circulatory system   |
| 420.21 | PRS_PC1 | 0,021  | 0,055 | 1,021 | 0,6990 | 343   | 156675 | Acute pericarditis                                                 | circulatory system   |
| 415    | PRS_PC1 | -0,006 | 0,016 | 0,994 | 0,7018 | 3969  | 153049 | Pulmonary heart disease                                            | circulatory system   |
| 289.5  | PRS_PC1 | -0,018 | 0,049 | 0,982 | 0,7086 | 425   | 156593 | Diseases of spleen                                                 | hematopoietic        |
| 709    | PRS_PC1 | -0,024 | 0,066 | 0,976 | 0,7111 | 239   | 156779 | Diffuse diseases of connective tissue                              | dermatologic         |

|       |         |        |       |       |        |       |        |                                                                |                         |
|-------|---------|--------|-------|-------|--------|-------|--------|----------------------------------------------------------------|-------------------------|
| 425   | PRS_PC1 | -0,011 | 0,031 | 0,989 | 0,7131 | 1113  | 155905 | Cardiomyopathy                                                 | circulatory system      |
| 430.1 | PRS_PC1 | -0,014 | 0,038 | 0,986 | 0,7166 | 707   | 156311 | Subarachnoid hemorrhage                                        | circulatory system      |
| 130   | PRS_PC1 | -0,025 | 0,070 | 0,975 | 0,7192 | 210   | 156808 | Spirochetal infection                                          | infectious diseases     |
| 635.3 | PRS_PC1 | -0,013 | 0,036 | 0,987 | 0,7201 | 823   | 156195 | Placenta previa and abruptio placenta                          | pregnancy complications |
| 722   | PRS_PC1 | -0,007 | 0,021 | 0,993 | 0,7310 | 2299  | 154719 | Intervertebral disc disorders                                  | musculoskeletal         |
| 722.9 | PRS_PC1 | -0,007 | 0,021 | 0,993 | 0,7310 | 2299  | 154719 | Other and unspecified disc disorder                            | musculoskeletal         |
| 389   | PRS_PC1 | -0,005 | 0,015 | 0,995 | 0,7351 | 5017  | 152001 | Hearing loss                                                   | sense organs            |
| 371.1 | PRS_PC1 | -0,008 | 0,024 | 0,992 | 0,7376 | 1764  | 155254 | Uveitis, noninfectious or NOS                                  | sense organs            |
| 938.1 | PRS_PC1 | 0,020  | 0,060 | 1,020 | 0,7393 | 293   | 156725 | Acute dermatitis due to solar radiation                        | dermatologic            |
| 580.1 | PRS_PC1 | 0,016  | 0,050 | 1,017 | 0,7415 | 420   | 156598 | Glomerulonephritis                                             | genitourinary           |
| 609   | PRS_PC1 | -0,018 | 0,055 | 0,982 | 0,7434 | 347   | 156671 | Male infertility and abnormal spermatozoa                      | genitourinary           |
| 609.1 | PRS_PC1 | -0,018 | 0,055 | 0,982 | 0,7434 | 347   | 156671 | Infertility, male                                              | genitourinary           |
| 332   | PRS_PC1 | 0,010  | 0,029 | 1,010 | 0,7454 | 1215  | 155803 | Parkinson's disease                                            | neurological            |
| 635.2 | PRS_PC1 | -0,017 | 0,053 | 0,983 | 0,7494 | 376   | 156642 | Antepartum hemorrhage, abruptio placentae, and placenta previa | pregnancy complications |
| 360   | PRS_PC1 | 0,010  | 0,032 | 1,010 | 0,7494 | 1043  | 155975 | Disorders of the globe                                         | sense organs            |
| 614.5 | PRS_PC1 | 0,006  | 0,020 | 1,006 | 0,7532 | 2596  | 154422 | Inflammatory disease of cervix, vagina, and vulva              | genitourinary           |
| 444   | PRS_PC1 | -0,012 | 0,039 | 0,988 | 0,7533 | 686   | 156332 | Arterial embolism and thrombosis                               | circulatory system      |
| 430.2 | PRS_PC1 | 0,012  | 0,038 | 1,012 | 0,7610 | 705   | 156313 | Intracerebral hemorrhage                                       | circulatory system      |
| 335   | PRS_PC1 | -0,010 | 0,033 | 0,990 | 0,7617 | 976   | 156042 | Multiple sclerosis                                             | neurological            |
| 411.3 | PRS_PC1 | -0,003 | 0,009 | 0,997 | 0,7618 | 13289 | 143729 | Angina pectoris                                                | circulatory system      |
| 594.8 | PRS_PC1 | 0,005  | 0,018 | 1,005 | 0,7664 | 3302  | 153716 | Renal colic                                                    | genitourinary           |

|        |         |        |       |       |        |       |        |                                                        |                         |
|--------|---------|--------|-------|-------|--------|-------|--------|--------------------------------------------------------|-------------------------|
| 165.1  | PRS_PC1 | 0,010  | 0,033 | 1,010 | 0,7728 | 941   | 156077 | Cancer of bronchus; lung                               | neoplasms               |
| 530.11 | PRS_PC1 | 0,002  | 0,007 | 1,002 | 0,7728 | 30043 | 126975 | GERD                                                   | digestive               |
| 622    | PRS_PC1 | -0,004 | 0,012 | 0,996 | 0,7744 | 7444  | 149574 | Polyp of female genital organs                         | genitourinary           |
| 622.1  | PRS_PC1 | -0,004 | 0,012 | 0,996 | 0,7744 | 7444  | 149574 | Polyp of corpus uteri                                  | genitourinary           |
| 701    | PRS_PC1 | -0,004 | 0,013 | 0,996 | 0,7748 | 6777  | 150241 | Other hypertrophic and atrophic conditions of skin     | dermatologic            |
| 342    | PRS_PC1 | 0,008  | 0,027 | 1,008 | 0,7763 | 1395  | 155623 | Hemiplegia                                             | neurological            |
| 663    | PRS_PC1 | 0,017  | 0,062 | 1,018 | 0,7796 | 280   | 156738 | Umbilical cord complications during labor and delivery | pregnancy complications |
| 635    | PRS_PC1 | -0,009 | 0,031 | 0,992 | 0,7829 | 1135  | 155883 | Hemorrhage during pregnancy; childbirth and postpartum | pregnancy complications |
| 520    | PRS_PC1 | 0,008  | 0,030 | 1,008 | 0,7918 | 1171  | 155847 | Disorders of tooth development                         | digestive               |
| 738    | PRS_PC1 | 0,007  | 0,026 | 1,007 | 0,7944 | 1500  | 155518 | Other acquired musculoskeletal deformity               | musculoskeletal         |
| 339    | PRS_PC1 | 0,004  | 0,016 | 1,004 | 0,7970 | 3926  | 153092 | Other headache syndromes                               | neurological            |
| 315    | PRS_PC1 | 0,018  | 0,072 | 1,018 | 0,7997 | 202   | 156816 | Developmental delays and disorders                     | mental disorders        |
| 540    | PRS_PC1 | -0,004 | 0,016 | 0,996 | 0,8044 | 4169  | 152849 | Appendiceal conditions                                 | digestive               |
| 707    | PRS_PC1 | -0,005 | 0,020 | 0,995 | 0,8056 | 2553  | 154465 | Chronic ulcer of skin                                  | dermatologic            |
| 521    | PRS_PC1 | -0,006 | 0,023 | 0,994 | 0,8073 | 1906  | 155112 | Diseases of hard tissues of teeth                      | digestive               |
| 521.1  | PRS_PC1 | -0,006 | 0,023 | 0,994 | 0,8073 | 1906  | 155112 | Dental caries                                          | digestive               |
| 430    | PRS_PC1 | 0,007  | 0,028 | 1,007 | 0,8074 | 1323  | 155695 | Intracranial hemorrhage                                | circulatory system      |
| 242    | PRS_PC1 | -0,005 | 0,019 | 0,995 | 0,8074 | 3092  | 153926 | Thyrotoxicosis with or without goiter                  | endocrine/metabolic     |

|        |         |        |       |       |        |       |        |                                                            |                    |
|--------|---------|--------|-------|-------|--------|-------|--------|------------------------------------------------------------|--------------------|
| 580.31 | PRS_PC1 | -0,014 | 0,057 | 0,986 | 0,8077 | 318   | 156700 | Nephritis and nephropathy in diseases classified elsewhere | genitourinary      |
| 465.4  | PRS_PC1 | 0,004  | 0,018 | 1,004 | 0,8095 | 3221  | 153797 | Acute laryngitis and tracheitis                            | respiratory        |
| 428    | PRS_PC1 | -0,003 | 0,014 | 0,997 | 0,8113 | 5796  | 151222 | Congestive heart failure; nonhypertensive                  | circulatory system |
| 428.2  | PRS_PC1 | -0,003 | 0,014 | 0,997 | 0,8113 | 5796  | 151222 | Heart failure NOS                                          | circulatory system |
| 608    | PRS_PC1 | -0,003 | 0,013 | 0,997 | 0,8142 | 6672  | 150346 | Other disorders of male genital organs                     | genitourinary      |
| 189.11 | PRS_PC1 | -0,010 | 0,043 | 0,990 | 0,8145 | 553   | 156465 | Malignant neoplasm of kidney, except pelvis                | neoplasms          |
| 741    | PRS_PC1 | -0,011 | 0,049 | 0,989 | 0,8160 | 441   | 156577 | Symptoms and disorders of the joints                       | musculoskeletal    |
| 465.2  | PRS_PC1 | 0,002  | 0,008 | 1,002 | 0,8207 | 16395 | 140623 | Acute pharyngitis                                          | respiratory        |
| 202    | PRS_PC1 | -0,007 | 0,033 | 0,993 | 0,8354 | 949   | 156069 | Cancer of other lymphoid, histiocytic tissue               | neoplasms          |
| 612.2  | PRS_PC1 | 0,006  | 0,030 | 1,006 | 0,8357 | 1162  | 155856 | Hypertrophy of breast (Gynecomastia)                       | genitourinary      |
| 568    | PRS_PC1 | -0,004 | 0,020 | 0,996 | 0,8382 | 2689  | 154329 | Other disorders of peritoneum                              | digestive          |
| 707.1  | PRS_PC1 | 0,005  | 0,026 | 1,005 | 0,8387 | 1570  | 155448 | Decubitus ulcer                                            | dermatologic       |
| 189.1  | PRS_PC1 | -0,008 | 0,042 | 0,992 | 0,8410 | 582   | 156436 | Cancer of kidney and renal pelvis                          | neoplasms          |
| 202.2  | PRS_PC1 | -0,006 | 0,033 | 0,994 | 0,8449 | 946   | 156072 | Non-Hodgkins lymphoma                                      | neoplasms          |
| 289    | PRS_PC1 | -0,006 | 0,029 | 0,994 | 0,8460 | 1236  | 155782 | Other diseases of blood and blood-forming organs           | hematopoietic      |
| 571    | PRS_PC1 | -0,010 | 0,053 | 0,990 | 0,8543 | 363   | 156655 | Chronic liver disease and cirrhosis                        | digestive          |

|        |         |        |       |       |        |      |        |                                                        |                         |
|--------|---------|--------|-------|-------|--------|------|--------|--------------------------------------------------------|-------------------------|
| 571.8  | PRS_PC1 | -0,010 | 0,053 | 0,990 | 0,8543 | 363  | 156655 | Liver abscess and sequelae of chronic liver disease    | digestive               |
| 567    | PRS_PC1 | 0,005  | 0,029 | 1,005 | 0,8578 | 1214 | 155804 | Peritonitis and retroperitoneal infections             | digestive               |
| 353    | PRS_PC1 | -0,003 | 0,017 | 0,997 | 0,8603 | 3734 | 153284 | Nerve root and plexus disorders                        | neurological            |
| 731.1  | PRS_PC1 | -0,012 | 0,072 | 0,988 | 0,8655 | 200  | 156818 | Osteitis deformans [Paget's disease of bone]           | musculoskeletal         |
| 290.11 | PRS_PC1 | 0,006  | 0,035 | 1,006 | 0,8681 | 864  | 156154 | Alzheimer's disease                                    | mental disorders        |
| 626.1  | PRS_PC1 | -0,004 | 0,026 | 0,996 | 0,8693 | 1595 | 155423 | Irregular menstrual cycle/bleeding                     | genitourinary           |
| 626.11 | PRS_PC1 | -0,004 | 0,026 | 0,996 | 0,8693 | 1595 | 155423 | Absent or infrequent menstruation                      | genitourinary           |
| 694.1  | PRS_PC1 | 0,007  | 0,041 | 1,007 | 0,8714 | 632  | 156386 | Vitiligo                                               | dermatologic            |
| 747    | PRS_PC1 | -0,005 | 0,029 | 0,995 | 0,8732 | 1253 | 155765 | Cardiac and circulatory congenital anomalies           | congenital anomalies    |
| 686.3  | PRS_PC1 | 0,005  | 0,034 | 1,005 | 0,8788 | 918  | 156100 | Pilonidal cyst                                         | dermatologic            |
| 615    | PRS_PC1 | 0,002  | 0,016 | 1,002 | 0,8794 | 4157 | 152861 | Endometriosis                                          | genitourinary           |
| 653    | PRS_PC1 | 0,007  | 0,045 | 1,007 | 0,8822 | 539  | 156479 | Problems associated with amniotic cavity and membranes | pregnancy complications |
| 337    | PRS_PC1 | -0,008 | 0,059 | 0,992 | 0,8855 | 301  | 156717 | Disorders of the autonomic nervous system              | neurological            |
| 385    | PRS_PC1 | -0,005 | 0,038 | 0,995 | 0,8864 | 725  | 156293 | Other disorders of middle ear and mastoid              | sense organs            |
| 352    | PRS_PC1 | 0,002  | 0,017 | 1,002 | 0,8872 | 3784 | 153234 | Disorders of other cranial nerves                      | neurological            |
| 661    | PRS_PC1 | -0,005 | 0,035 | 0,995 | 0,8919 | 905  | 156113 | Fetal distress and abnormal forces of labor            | pregnancy complications |



|        |         |        |       |       |        |       |        |                                                              |                      |
|--------|---------|--------|-------|-------|--------|-------|--------|--------------------------------------------------------------|----------------------|
| 287    | PRS_PC1 | 0,003  | 0,023 | 1,003 | 0,8971 | 2041  | 154977 | Purpura and other hemorrhagic conditions                     | hematopoietic        |
| 540.1  | PRS_PC1 | -0,002 | 0,016 | 0,998 | 0,8981 | 4044  | 152974 | Appendicitis                                                 | digestive            |
| 614    | PRS_PC1 | 0,002  | 0,019 | 1,002 | 0,8994 | 3068  | 153950 | Inflammatory diseases of female pelvic organs                | genitourinary        |
| 938    | PRS_PC1 | -0,001 | 0,009 | 0,999 | 0,9058 | 13202 | 143816 | Dermatitis due to solar radiation                            | dermatologic         |
| 191    | PRS_PC1 | 0,007  | 0,062 | 1,007 | 0,9121 | 273   | 156745 | Manlignant and unknown neoplasms of brain and nervous system | neoplasms            |
| 378    | PRS_PC1 | -0,004 | 0,038 | 0,996 | 0,9145 | 737   | 156281 | Strabismus and other disorders of binocular eye movements    | sense organs         |
| 53     | PRS_PC1 | -0,001 | 0,010 | 0,999 | 0,9147 | 11281 | 145737 | Herpes zoster                                                | infectious diseases  |
| 702    | PRS_PC1 | 0,001  | 0,008 | 1,001 | 0,9194 | 20945 | 136073 | Degenerative skin conditions and other dermatoses            | dermatologic         |
| 702.2  | PRS_PC1 | 0,001  | 0,008 | 1,001 | 0,9194 | 20945 | 136073 | Seborrheic keratosis                                         | dermatologic         |
| 585.1  | PRS_PC1 | -0,001 | 0,014 | 0,999 | 0,9216 | 5974  | 151044 | Acute renal failure                                          | genitourinary        |
| 506    | PRS_PC1 | 0,002  | 0,027 | 1,002 | 0,9287 | 1418  | 155600 | Empyema and pneumothorax                                     | respiratory          |
| 612    | PRS_PC1 | -0,003 | 0,029 | 0,997 | 0,9289 | 1222  | 155796 | Breast conditions, congenital or relating to hormones        | genitourinary        |
| 753    | PRS_PC1 | 0,004  | 0,049 | 1,004 | 0,9313 | 441   | 156577 | Congenital anomalies of the eye                              | congenital anomalies |
| 366.2  | PRS_PC1 | -0,001 | 0,011 | 0,999 | 0,9315 | 9049  | 147969 | Senile cataract                                              | sense organs         |
| 366    | PRS_PC1 | -0,001 | 0,008 | 0,999 | 0,9325 | 19688 | 137330 | Cataract                                                     | sense organs         |
| 540.11 | PRS_PC1 | 0,002  | 0,023 | 1,002 | 0,9359 | 2031  | 154987 | Acute appendicitis                                           | digestive            |
| 737    | PRS_PC1 | -0,002 | 0,025 | 0,998 | 0,9376 | 1645  | 155373 | Curvature of spine                                           | musculoskeletal      |

|        |         |        |       |       |        |       |        |                              |                         |
|--------|---------|--------|-------|-------|--------|-------|--------|------------------------------|-------------------------|
| 737.3  | PRS_PC1 | -0,002 | 0,025 | 0,998 | 0,9376 | 1645  | 155373 | Kyphoscoliosis and scoliosis | musculoskeletal         |
| 245    | PRS_PC1 | -0,003 | 0,041 | 0,997 | 0,9392 | 614   | 156404 | Thyroiditis                  | endocrine/metabolic     |
| 401.21 | PRS_PC1 | -0,005 | 0,069 | 0,995 | 0,9400 | 221   | 156797 | Hypertensive heart disease   | circulatory system      |
| 200    | PRS_PC1 | 0,004  | 0,058 | 1,004 | 0,9459 | 307   | 156711 | Myeloproliferative disease   | neoplasms               |
| 785    | PRS_PC1 | 0,001  | 0,012 | 1,001 | 0,9460 | 8304  | 148714 | Abdominal pain               | symptoms                |
|        |         |        |       |       |        |       |        | Gout and other crystal       |                         |
| 274    | PRS_PC1 | -0,001 | 0,011 | 0,999 | 0,9512 | 8693  | 148325 | arthropathies                | endocrine/metabolic     |
| 274.1  | PRS_PC1 | -0,001 | 0,011 | 0,999 | 0,9512 | 8693  | 148325 | Gout                         | endocrine/metabolic     |
|        |         |        |       |       |        |       |        | Esophageal bleeding          |                         |
| 530.2  | PRS_PC1 | 0,003  | 0,053 | 1,003 | 0,9546 | 374   | 156644 | (varices/hemorrhage)         | digestive               |
|        |         |        |       |       |        |       |        | Corneal opacity and other    |                         |
| 364    | PRS_PC1 | 0,001  | 0,025 | 1,001 | 0,9591 | 1709  | 155309 | disorders of cornea          | sense organs            |
| 285    | PRS_PC1 | 0,000  | 0,010 | 1,000 | 0,9611 | 11521 | 145497 | Other anemias                | hematopoietic           |
|        |         |        |       |       |        |       |        | Nonrheumatic aortic valve    |                         |
| 395.2  | PRS_PC1 | -0,001 | 0,020 | 0,999 | 0,9741 | 2574  | 154444 | disorders                    | circulatory system      |
|        |         |        |       |       |        |       |        | Acute bronchitis and         |                         |
| 483    | PRS_PC1 | 0,000  | 0,017 | 1,000 | 0,9782 | 3933  | 153085 | bronchiolitis                | respiratory             |
|        |         |        |       |       |        |       |        | Other infectious and         |                         |
| 136    | PRS_PC1 | -0,001 | 0,043 | 0,999 | 0,9818 | 565   | 156453 | parasitic diseases           | infectious diseases     |
| 590    | PRS_PC1 | 0,000  | 0,024 | 1,000 | 0,9834 | 1876  | 155142 | Pyelonephritis               | genitourinary           |
|        |         |        |       |       |        |       |        | Chronic dermatitis due to    |                         |
| 938.2  | PRS_PC1 | 0,000  | 0,010 | 1,000 | 0,9928 | 12915 | 144103 | solar radiation              | dermatologic            |
| 636.2  | PRS_PC1 | 0,000  | 0,055 | 1,000 | 0,9941 | 351   | 156667 | Early onset of delivery      | pregnancy complications |
| 78     | PRS_PC1 | 0,000  | 0,010 | 1,000 | 0,9942 | 12021 | 144997 | Viral warts & HPV            | infectious diseases     |
|        |         |        |       |       |        |       |        | Other disorders of bone and  |                         |
| 733    | PRS_PC1 | 0,000  | 0,017 | 1,000 | 0,9963 | 3513  | 153505 | cartilage                    | musculoskeletal         |
|        |         |        |       |       |        |       |        | Cardiac shunt/ heart septal  |                         |
| 747.11 | PRS_PC1 | 0,000  | 0,044 | 1,000 | 0,9965 | 532   | 156486 | defect                       | congenital anomalies    |
|        |         |        |       |       |        |       |        | Disturbances in tooth        |                         |
| 520.2  | PRS_PC1 | 0,000  | 0,031 | 1,000 | 0,9966 | 1060  | 155958 | eruption                     | digestive               |

|       |         |       |       |       |        |      |        |                       |                    |
|-------|---------|-------|-------|-------|--------|------|--------|-----------------------|--------------------|
| 440   | PRS_PC1 | 0,000 | 0,030 | 1,000 | 0,9972 | 1199 | 155819 | Atherosclerosis       | circulatory system |
| 411.2 | PRS_PC1 | 0,000 | 0,012 | 1,000 | 0,9976 | 8051 | 148967 | Myocardial infarction | circulatory system |

**Sheet 4 Results from the sensitivity analysis adjusting for antipsychotic use in individuals with any prescription record**

| phenotype | snp     | beta   | SE    | OR    | p        | n_cases | n_controls | description                               | group               |
|-----------|---------|--------|-------|-------|----------|---------|------------|-------------------------------------------|---------------------|
| 296.1     | PRS_PC1 | 0,408  | 0,059 | 1,504 | 5,50E-12 | 296     | 68998      | Bipolar                                   | mental disorders    |
| 296       | PRS_PC1 | 0,226  | 0,036 | 1,253 | 2,04E-10 | 833     | 68461      | Mood disorders                            | mental disorders    |
|           |         |        |       |       |          |         |            | Other disorders of synovium, tendon, and  |                     |
| 727       | PRS_PC1 | -0,068 | 0,015 | 0,934 | 8,39E-06 | 4775    | 64519      | bursa                                     | musculoskeletal     |
| 727.1     | PRS_PC1 | -0,068 | 0,015 | 0,934 | 8,39E-06 | 4775    | 64519      | Synovitis and tenosynovitis               | musculoskeletal     |
|           |         |        |       |       |          |         |            | Substance addiction and                   |                     |
| 316       | PRS_PC1 | 0,089  | 0,023 | 1,093 | 1,38E-04 | 1979    | 67315      | disorders                                 | mental disorders    |
|           |         |        |       |       |          |         |            | Other peripheral nerve                    |                     |
| 351       | PRS_PC1 | -0,048 | 0,013 | 0,953 | 3,06E-04 | 6563    | 62731      | disorders                                 | neurological        |
|           |         |        |       |       |          |         |            | Other diseases of respiratory system, not |                     |
| 519       | PRS_PC1 | 0,032  | 0,009 | 1,032 | 3,61E-04 | 18324   | 50970      | elsewhere classified                      | respiratory         |
|           |         |        |       |       |          |         |            | Other diseases of                         |                     |
| 519.8     | PRS_PC1 | 0,032  | 0,009 | 1,032 | 3,61E-04 | 18324   | 50970      | respiratory system, NEC                   | respiratory         |
| 278.1     | PRS_PC1 | -0,041 | 0,012 | 0,960 | 3,88E-04 | 9045    | 60249      | Obesity                                   | endocrine/metabolic |
|           |         |        |       |       |          |         |            | Overweight, obesity and                   |                     |
| 278       | PRS_PC1 | -0,041 | 0,012 | 0,960 | 4,32E-04 | 9068    | 60226      | other hyperalimentation                   | endocrine/metabolic |
| 496.2     | PRS_PC1 | 0,058  | 0,018 | 1,060 | 9,38E-04 | 3617    | 65677      | Chronic bronchitis                        | respiratory         |
| 495       | PRS_PC1 | 0,035  | 0,011 | 1,036 | 9,79E-04 | 10937   | 58357      | Asthma                                    | respiratory         |
|           |         |        |       |       |          |         |            | Obstructive chronic                       |                     |
| 496.21    | PRS_PC1 | 0,058  | 0,018 | 1,059 | 1,16E-03 | 3541    | 65753      | bronchitis                                | respiratory         |
|           |         |        |       |       |          |         |            | Peripheral enthesopathies                 |                     |
| 726       | PRS_PC1 | -0,038 | 0,012 | 0,962 | 1,18E-03 | 8467    | 60827      | and allied syndromes                      | musculoskeletal     |
| 496       | PRS_PC1 | 0,051  | 0,016 | 1,053 | 1,32E-03 | 4423    | 64871      | Chronic airway obstruction                | respiratory         |
|           |         |        |       |       |          |         |            | Functional digestive                      |                     |
| 564       | PRS_PC1 | 0,033  | 0,010 | 1,033 | 1,37E-03 | 12443   | 56851      | disorders                                 | digestive           |
| 700       | PRS_PC1 | 0,095  | 0,031 | 1,100 | 1,85E-03 | 1126    | 68168      | Corns and callosities                     | dermatologic        |

|        |         |        |       |       |          |      |       |                                                          |                         |
|--------|---------|--------|-------|-------|----------|------|-------|----------------------------------------------------------|-------------------------|
| 569    | PRS_PC1 | 0,044  | 0,014 | 1,045 | 2,01E-03 | 5586 | 63708 | Other disorders of intestine                             | digestive               |
| 716    | PRS_PC1 | -0,036 | 0,012 | 0,964 | 2,54E-03 | 8268 | 61026 | Other arthropathies                                      | musculoskeletal         |
| 716.9  | PRS_PC1 | -0,036 | 0,012 | 0,964 | 2,54E-03 | 8268 | 61026 | Arthropathy NOS                                          | musculoskeletal         |
| 564.1  | PRS_PC1 | 0,037  | 0,012 | 1,038 | 2,75E-03 | 7795 | 61499 | Irritable Bowel Syndrome                                 | digestive               |
| 300.3  | PRS_PC1 | 0,206  | 0,070 | 1,229 | 3,34E-03 | 210  | 69084 | Obsessive-compulsive disorders                           | mental disorders        |
| 522    | PRS_PC1 | 0,067  | 0,023 | 1,069 | 3,66E-03 | 2009 | 67285 | Diseases of pulp and periapical tissues                  | digestive               |
| 594.2  | PRS_PC1 | -0,182 | 0,063 | 0,834 | 3,88E-03 | 263  | 69031 | Calculus of lower urinary tract                          | genitourinary           |
| 716.2  | PRS_PC1 | -0,034 | 0,012 | 0,966 | 4,64E-03 | 8114 | 61180 | Unspecified monoarthritis                                | musculoskeletal         |
| 454    | PRS_PC1 | 0,039  | 0,014 | 1,040 | 5,73E-03 | 5572 | 63722 | Varicose veins                                           | circulatory system      |
| 695.3  | PRS_PC1 | 0,069  | 0,026 | 1,072 | 6,72E-03 | 1644 | 67650 | Rosacea                                                  | dermatologic            |
| 694    | PRS_PC1 | 0,072  | 0,027 | 1,074 | 7,15E-03 | 1495 | 67799 | Dyschromia and Vitiligo                                  | dermatologic            |
| 695    | PRS_PC1 | 0,051  | 0,019 | 1,052 | 7,77E-03 | 3022 | 66272 | Erythematous conditions                                  | dermatologic            |
| 636    | PRS_PC1 | 0,110  | 0,041 | 1,116 | 8,03E-03 | 661  | 68633 | Early or threatened labor; hemorrhage in early pregnancy | pregnancy complications |
| 454.1  | PRS_PC1 | 0,039  | 0,015 | 1,040 | 8,09E-03 | 5118 | 64176 | Varicose veins of lower extremity                        | circulatory system      |
| 540.11 | PRS_PC1 | -0,088 | 0,034 | 0,916 | 8,81E-03 | 926  | 68368 | Acute appendicitis                                       | digestive               |
| 496.1  | PRS_PC1 | 0,098  | 0,038 | 1,103 | 9,61E-03 | 733  | 68561 | Emphysema                                                | respiratory             |
| 706.1  | PRS_PC1 | 0,064  | 0,025 | 1,066 | 0,0108   | 1706 | 67588 | Acne                                                     | dermatologic            |
| 380    | PRS_PC1 | 0,029  | 0,011 | 1,029 | 0,0116   | 9572 | 59722 | Disorders of external ear                                | sense organs            |
| 433.3  | PRS_PC1 | 0,071  | 0,029 | 1,074 | 0,0129   | 1295 | 67999 | Cerebral ischemia                                        | circulatory system      |
| 686.2  | PRS_PC1 | 0,116  | 0,047 | 1,123 | 0,0131   | 483  | 68811 | Impetigo                                                 | dermatologic            |
| 357    | PRS_PC1 | -0,138 | 0,056 | 0,871 | 0,0139   | 332  | 68962 | Inflammatory and toxic neuropathy                        | neurological            |

|        |         |        |       |       |        |      |       |                                                             |                         |
|--------|---------|--------|-------|-------|--------|------|-------|-------------------------------------------------------------|-------------------------|
|        |         |        |       |       |        |      |       | Delirium dementia and<br>amnesic and other                  |                         |
| 290    | PRS_PC1 | 0,082  | 0,034 | 1,086 | 0,0142 | 949  | 68345 | cognitive disorders                                         | mental disorders        |
| 694.2  | PRS_PC1 | 0,072  | 0,029 | 1,075 | 0,0142 | 1227 | 68067 | Other dyschromia                                            | dermatologic            |
|        |         |        |       |       |        |      |       | Other and unspecified<br>disorders of the nervous<br>system |                         |
| 349    | PRS_PC1 | 0,117  | 0,048 | 1,124 | 0,0145 | 454  | 68840 |                                                             | neurological            |
| 480    | PRS_PC1 | 0,035  | 0,015 | 1,036 | 0,0150 | 5361 | 63933 | Pneumonia                                                   | respiratory             |
|        |         |        |       |       |        |      |       | Chronic pharyngitis and<br>nasopharyngitis                  |                         |
| 472    | PRS_PC1 | 0,057  | 0,024 | 1,059 | 0,0164 | 1891 | 67403 |                                                             | respiratory             |
|        |         |        |       |       |        |      |       | Psychogenic and<br>somatoform disorders                     |                         |
| 303    | PRS_PC1 | 0,081  | 0,034 | 1,084 | 0,0173 | 904  | 68390 |                                                             | mental disorders        |
| 303.4  | PRS_PC1 | 0,081  | 0,034 | 1,084 | 0,0173 | 904  | 68390 | Somatoform disorder                                         | mental disorders        |
| 665    | PRS_PC1 | 0,084  | 0,035 | 1,087 | 0,0180 | 1034 | 68260 | Obstetrical/birth trauma                                    | pregnancy complications |
| 433    | PRS_PC1 | 0,042  | 0,018 | 1,043 | 0,0182 | 3441 | 65853 | Cerebrovascular disease                                     | circulatory system      |
| 261.4  | PRS_PC1 | 0,087  | 0,038 | 1,091 | 0,0215 | 729  | 68565 | Vitamin D deficiency                                        | endocrine/metabolic     |
|        |         |        |       |       |        |      |       | Cerebral artery occlusion,<br>with cerebral infarction      |                         |
| 433.21 | PRS_PC1 | 0,059  | 0,026 | 1,061 | 0,0234 | 1582 | 67712 |                                                             | circulatory system      |
|        |         |        |       |       |        |      |       | Hemorrhage in early<br>pregnancy                            |                         |
| 636.3  | PRS_PC1 | 0,118  | 0,054 | 1,126 | 0,0277 | 377  | 68917 |                                                             | pregnancy complications |
|        |         |        |       |       |        |      |       | Other disorders of urethra<br>and urinary tract             |                         |
| 597    | PRS_PC1 | 0,066  | 0,030 | 1,068 | 0,0277 | 1188 | 68106 |                                                             | genitourinary           |
|        |         |        |       |       |        |      |       | Retinal detachments and<br>defects                          |                         |
| 361    | PRS_PC1 | 0,064  | 0,029 | 1,067 | 0,0280 | 1225 | 68069 |                                                             | sense organs            |
|        |         |        |       |       |        |      |       | Retinal detachment with<br>retinal defect                   |                         |
| 361.1  | PRS_PC1 | 0,064  | 0,029 | 1,067 | 0,0280 | 1225 | 68069 |                                                             | sense organs            |
|        |         |        |       |       |        |      |       | Nephritis; nephrosis; renal<br>sclerosis                    |                         |
| 580    | PRS_PC1 | 0,104  | 0,048 | 1,109 | 0,0302 | 454  | 68840 |                                                             | genitourinary           |
| 333.4  | PRS_PC1 | 0,129  | 0,060 | 1,138 | 0,0314 | 290  | 69004 | Torsion dystonia                                            | neurological            |
| 540    | PRS_PC1 | -0,050 | 0,024 | 0,951 | 0,0355 | 1860 | 67434 | Appendiceal conditions                                      | digestive               |

|       |         |        |       |       |        |      |                                  |                     |
|-------|---------|--------|-------|-------|--------|------|----------------------------------|---------------------|
|       |         |        |       |       |        |      | Retinal vascular changes         |                     |
| 362.4 | PRS_PC1 | -0,089 | 0,043 | 0,915 | 0,0385 | 565  | 68729 and abnormalities          | sense organs        |
| 320   | PRS_PC1 | -0,098 | 0,048 | 0,906 | 0,0396 | 455  | 68839 Meningitis                 | neurological        |
| 380.1 | PRS_PC1 | 0,026  | 0,013 | 1,027 | 0,0413 | 6995 | 62299 Otitis externa             | sense organs        |
|       |         |        |       |       |        |      | Lung disease due to              |                     |
| 500   | PRS_PC1 | 0,136  | 0,067 | 1,146 | 0,0423 | 232  | 69062 external agents            | respiratory         |
| 565   | PRS_PC1 | 0,047  | 0,023 | 1,048 | 0,0423 | 1970 | 67324 Anal and rectal conditions | digestive           |
|       |         |        |       |       |        |      | Other specified                  |                     |
|       |         |        |       |       |        |      | nonpsychotic and/or              |                     |
| 291   | PRS_PC1 | 0,136  | 0,067 | 1,146 | 0,0430 | 229  | 69065 transient mental disorders | mental disorders    |
| 290.1 | PRS_PC1 | 0,070  | 0,035 | 1,073 | 0,0441 | 879  | 68415 Dementias                  | mental disorders    |
|       |         |        |       |       |        |      | Noninflammatory female           |                     |
| 619   | PRS_PC1 | 0,041  | 0,020 | 1,042 | 0,0448 | 2689 | 66605 genital disorders          | genitourinary       |
| 540.1 | PRS_PC1 | -0,048 | 0,024 | 0,953 | 0,0478 | 1794 | 67500 Appendicitis               | digestive           |
|       |         |        |       |       |        |      | Noninflammatory disorders        |                     |
| 619.3 | PRS_PC1 | 0,097  | 0,050 | 1,101 | 0,0516 | 427  | 68867 of cervix                  | genitourinary       |
| 079.1 | PRS_PC1 | -0,043 | 0,022 | 0,958 | 0,0529 | 2195 | 67099 Varicella infection        | infectious diseases |
| 261   | PRS_PC1 | 0,052  | 0,027 | 1,054 | 0,0533 | 1452 | 67842 Vitamin deficiency         | endocrine/metabolic |
| 342   | PRS_PC1 | 0,080  | 0,042 | 1,083 | 0,0552 | 600  | 68694 Hemiplegia                 | neurological        |
| 172   | PRS_PC1 | -0,028 | 0,015 | 0,972 | 0,0607 | 5011 | 64283 Skin cancer                | neoplasms           |
|       |         |        |       |       |        |      | Other disorders of soft          |                     |
| 729   | PRS_PC1 | -0,028 | 0,015 | 0,972 | 0,0610 | 5061 | 64233 tissues                    | musculoskeletal     |
| 604   | PRS_PC1 | -0,071 | 0,038 | 0,931 | 0,0633 | 718  | 68576 Disorders of penis         | genitourinary       |
|       |         |        |       |       |        |      | Redundant prepuce and            |                     |
| 604.1 | PRS_PC1 | -0,071 | 0,038 | 0,931 | 0,0633 | 718  | 68576 phimosis/BXO               | genitourinary       |
|       |         |        |       |       |        |      | Other non-epithelial cancer      |                     |
| 172.2 | PRS_PC1 | -0,030 | 0,016 | 0,971 | 0,0690 | 4141 | 65153 of skin                    | neoplasms           |
| 250.1 | PRS_PC1 | -0,067 | 0,037 | 0,935 | 0,0712 | 756  | 68538 Type 1 diabetes            | endocrine/metabolic |
|       |         |        |       |       |        |      | Hereditary retinal               |                     |
| 362.7 | PRS_PC1 | -0,078 | 0,043 | 0,925 | 0,0736 | 556  | 68738 dystrophies                | sense organs        |

|       |         |        |       |       |        |      |       |                                                                       |                         |
|-------|---------|--------|-------|-------|--------|------|-------|-----------------------------------------------------------------------|-------------------------|
| 580.3 | PRS_PC1 | 0,112  | 0,063 | 1,119 | 0,0750 | 262  | 69032 | Nephritis and nephropathy<br>without mention of<br>glomerulonephritis | genitourinary           |
| 751.2 | PRS_PC1 | 0,094  | 0,054 | 1,098 | 0,0797 | 361  | 68933 | Congenital anomalies of<br>urinary system                             | congenital anomalies    |
| 597.1 | PRS_PC1 | 0,059  | 0,034 | 1,061 | 0,0818 | 904  | 68390 | Urethral stricture (not<br>specified as infectious)                   | genitourinary           |
| 381   | PRS_PC1 | -0,024 | 0,014 | 0,976 | 0,0834 | 5730 | 63564 | Otitis media and Eustachian<br>tube disorders                         | sense organs            |
| 706   | PRS_PC1 | 0,025  | 0,015 | 1,026 | 0,0926 | 4873 | 64421 | Diseases of sebaceous<br>glands                                       | dermatologic            |
| 369.5 | PRS_PC1 | 0,021  | 0,013 | 1,021 | 0,0931 | 7582 | 61712 | Conjunctivitis, infectious                                            | sense organs            |
| 613.1 | PRS_PC1 | -0,073 | 0,044 | 0,929 | 0,0956 | 545  | 68749 | Inflammatory disease of<br>breast                                     | genitourinary           |
| 381.2 | PRS_PC1 | -0,043 | 0,026 | 0,958 | 0,0999 | 1544 | 67750 | Eustachian tube disorders                                             | sense organs            |
| 661   | PRS_PC1 | 0,090  | 0,055 | 1,094 | 0,1035 | 388  | 68906 | Fetal distress and abnormal<br>forces of labor                        | pregnancy complications |
| 384.4 | PRS_PC1 | 0,075  | 0,046 | 1,077 | 0,1068 | 488  | 68806 | Perforation of tympanic<br>membrane                                   | sense organs            |
| 369   | PRS_PC1 | 0,020  | 0,012 | 1,020 | 0,1103 | 7618 | 61676 | Infection of the eye                                                  | sense organs            |
| 433.2 | PRS_PC1 | 0,033  | 0,021 | 1,033 | 0,1197 | 2477 | 66817 | Occlusion of cerebral<br>arteries                                     | circulatory system      |
| 696.4 | PRS_PC1 | 0,028  | 0,018 | 1,028 | 0,1245 | 3244 | 66050 | Psoriasis                                                             | dermatologic            |
| 476   | PRS_PC1 | 0,018  | 0,012 | 1,018 | 0,1256 | 9002 | 60292 | Allergic rhinitis                                                     | respiratory             |
| 300   | PRS_PC1 | 0,047  | 0,031 | 1,048 | 0,1258 | 1125 | 68169 | Anxiety disorders                                                     | mental disorders        |
| 612.2 | PRS_PC1 | 0,067  | 0,044 | 1,069 | 0,1272 | 547  | 68747 | Hypertrophy of breast<br>(Gynecomastia)                               | genitourinary           |
| 497   | PRS_PC1 | 0,033  | 0,022 | 1,034 | 0,1286 | 2236 | 67058 | Bronchitis                                                            | respiratory             |
| 280   | PRS_PC1 | -0,022 | 0,015 | 0,978 | 0,1288 | 5265 | 64029 | Iron deficiency anemias                                               | hematopoietic           |



|        |         |        |       |       |        |      |       |                                                                     |                         |
|--------|---------|--------|-------|-------|--------|------|-------|---------------------------------------------------------------------|-------------------------|
| 280.1  | PRS_PC1 | -0,022 | 0,015 | 0,978 | 0,1288 | 5265 | 64029 | Iron deficiency anemias,<br>unspecified or not due to<br>blood loss | hematopoietic           |
| 596    | PRS_PC1 | 0,024  | 0,016 | 1,024 | 0,1294 | 4445 | 64849 | Other disorders of bladder                                          | genitourinary           |
| 384    | PRS_PC1 | 0,063  | 0,042 | 1,065 | 0,1319 | 604  | 68690 | Other disorders of tympanic<br>membrane                             | sense organs            |
| 202    | PRS_PC1 | -0,074 | 0,050 | 0,928 | 0,1353 | 420  | 68874 | Cancer of other lymphoid,<br>histiocytic tissue                     | neoplasms               |
| 573    | PRS_PC1 | 0,032  | 0,021 | 1,032 | 0,1374 | 2356 | 66938 | Other disorders of liver                                            | digestive               |
| 947    | PRS_PC1 | -0,027 | 0,018 | 0,974 | 0,1378 | 3434 | 65860 | Urticaria                                                           | dermatologic            |
| 755    | PRS_PC1 | 0,073  | 0,050 | 1,076 | 0,1423 | 419  | 68875 | Congenital anomalies of<br>limbs                                    | congenital anomalies    |
| 291.4  | PRS_PC1 | 0,104  | 0,071 | 1,109 | 0,1449 | 205  | 69089 | Specific nonpsychotic<br>mental disorders due to<br>brain damage    | mental disorders        |
| 79     | PRS_PC1 | -0,018 | 0,013 | 0,982 | 0,1491 | 7219 | 62075 | Viral infection                                                     | infectious diseases     |
| 202.2  | PRS_PC1 | -0,071 | 0,050 | 0,932 | 0,1557 | 418  | 68876 | Non-Hodgkins lymphoma                                               | neoplasms               |
| 520    | PRS_PC1 | 0,064  | 0,045 | 1,066 | 0,1557 | 507  | 68787 | Disorders of tooth<br>development                                   | digestive               |
| 450    | PRS_PC1 | 0,067  | 0,048 | 1,070 | 0,1610 | 453  | 68841 | Noninfectious disorders of<br>lymphatic channels                    | circulatory system      |
| 618    | PRS_PC1 | 0,025  | 0,018 | 1,025 | 0,1615 | 3720 | 65574 | Genital prolapse                                                    | genitourinary           |
| 618.1  | PRS_PC1 | 0,025  | 0,018 | 1,025 | 0,1615 | 3720 | 65574 | Prolapse of vaginal walls                                           | genitourinary           |
| 634    | PRS_PC1 | 0,031  | 0,022 | 1,032 | 0,1616 | 2249 | 67045 | Miscarriage; stillbirth                                             | pregnancy complications |
| 696    | PRS_PC1 | 0,023  | 0,017 | 1,024 | 0,1732 | 3727 | 65567 | Psoriasis and related<br>disorders                                  | dermatologic            |
| 480.11 | PRS_PC1 | 0,089  | 0,065 | 1,093 | 0,1739 | 242  | 69052 | Pneumococcal pneumonia                                              | respiratory             |
| 368    | PRS_PC1 | 0,026  | 0,019 | 1,027 | 0,1754 | 2876 | 66418 | Visual disturbances                                                 | sense organs            |
| 835    | PRS_PC1 | -0,021 | 0,015 | 0,980 | 0,1801 | 4665 | 64629 | Internal derangement of<br>knee                                     | injuries & poisonings   |

|        |         |        |       |       |        |      |                                     |                         |
|--------|---------|--------|-------|-------|--------|------|-------------------------------------|-------------------------|
| 474    | PRS_PC1 | -0,021 | 0,016 | 0,979 | 0,1826 | 4501 | 64793 Acute and chronic tonsillitis | respiratory             |
|        |         |        |       |       |        |      | Diseases of the salivary            |                         |
| 527    | PRS_PC1 | 0,045  | 0,034 | 1,046 | 0,1861 | 893  | 68401 glands                        | digestive               |
|        |         |        |       |       |        |      | Problems associated with            |                         |
|        |         |        |       |       |        |      | amniotic cavity and                 |                         |
| 653    | PRS_PC1 | 0,089  | 0,068 | 1,093 | 0,1880 | 248  | 69046 membranes                     | pregnancy complications |
| 740    | PRS_PC1 | -0,021 | 0,016 | 0,980 | 0,1944 | 4520 | 64774 Osteoarthritis                | musculoskeletal         |
| 740.1  | PRS_PC1 | -0,021 | 0,016 | 0,980 | 0,1944 | 4520 | 64774 Osteoarthritis; localized     | musculoskeletal         |
| 601.1  | PRS_PC1 | 0,042  | 0,033 | 1,043 | 0,1973 | 1011 | 68283 Prostatitis                   | genitourinary           |
| 327    | PRS_PC1 | 0,021  | 0,016 | 1,021 | 0,1982 | 4316 | 64978 Sleep disorders               | neurological            |
| 550.1  | PRS_PC1 | 0,019  | 0,015 | 1,019 | 0,1999 | 5649 | 63645 Inguinal hernia               | digestive               |
|        |         |        |       |       |        |      | Malignant neoplasm of               |                         |
| 184.11 | PRS_PC1 | -0,087 | 0,068 | 0,917 | 0,2033 | 223  | 69071 ovary                         | neoplasms               |
| 722    | PRS_PC1 | 0,040  | 0,032 | 1,041 | 0,2036 | 1044 | 68250 Intervertebral disc disorders | musculoskeletal         |
|        |         |        |       |       |        |      | Other and unspecified disc          |                         |
| 722.9  | PRS_PC1 | 0,040  | 0,032 | 1,041 | 0,2036 | 1044 | 68250 disorder                      | musculoskeletal         |
| 475    | PRS_PC1 | 0,024  | 0,019 | 1,024 | 0,2081 | 2944 | 66350 Chronic sinusitis             | respiratory             |
|        |         |        |       |       |        |      | Intestinal malabsorption            |                         |
| 557    | PRS_PC1 | -0,042 | 0,034 | 0,958 | 0,2082 | 924  | 68370 (non-celiac)                  | digestive               |
| 555.1  | PRS_PC1 | 0,056  | 0,044 | 1,057 | 0,2088 | 533  | 68761 Regional enteritis            | digestive               |
|        |         |        |       |       |        |      | Other disorders of                  |                         |
|        |         |        |       |       |        |      | pancreatic internal                 |                         |
| 251    | PRS_PC1 | -0,045 | 0,036 | 0,956 | 0,2107 | 818  | 68476 secretion                     | endocrine/metabolic     |
|        |         |        |       |       |        |      | Disturbances in tooth               |                         |
| 520.2  | PRS_PC1 | 0,058  | 0,047 | 1,060 | 0,2189 | 465  | 68829 eruption                      | digestive               |
| 507    | PRS_PC1 | 0,026  | 0,021 | 1,026 | 0,2201 | 2500 | 66794 Pleurisy; pleural effusion    | respiratory             |

|       |         |        |       |       |        |      |       |                                                                              |                      |
|-------|---------|--------|-------|-------|--------|------|-------|------------------------------------------------------------------------------|----------------------|
|       |         |        |       |       |        |      |       | Vertiginous syndromes and<br>other disorders of vestibular                   |                      |
| 386   | PRS_PC1 | -0,022 | 0,018 | 0,979 | 0,2247 | 3634 | 65660 | system                                                                       | sense organs         |
| 707   | PRS_PC1 | 0,038  | 0,031 | 1,038 | 0,2267 | 1096 | 68198 | Chronic ulcer of skin                                                        | dermatologic         |
| 389   | PRS_PC1 | 0,026  | 0,022 | 1,026 | 0,2296 | 2277 | 67017 | Hearing loss                                                                 | sense organs         |
| 427.2 | PRS_PC1 | 0,017  | 0,015 | 1,018 | 0,2319 | 5589 | 63705 | Atrial fibrillation and flutter                                              | circulatory system   |
| 245   | PRS_PC1 | 0,072  | 0,061 | 1,074 | 0,2355 | 284  | 69010 | Thyroiditis                                                                  | endocrine/metabolic  |
| 335   | PRS_PC1 | -0,057 | 0,049 | 0,944 | 0,2382 | 439  | 68855 | Multiple sclerosis                                                           | neurological         |
| 592   | PRS_PC1 | 0,017  | 0,015 | 1,018 | 0,2399 | 5352 | 63942 | Cystitis and urethritis                                                      | genitourinary        |
| 750   | PRS_PC1 | 0,067  | 0,057 | 1,069 | 0,2425 | 317  | 68977 | Digestive congenital<br>anomalies                                            | congenital anomalies |
| 184.1 | PRS_PC1 | -0,077 | 0,066 | 0,926 | 0,2451 | 238  | 69056 | Malignant neoplasm of<br>ovary and other uterine<br>adnexa                   | neoplasms            |
| 619.1 | PRS_PC1 | 0,025  | 0,022 | 1,026 | 0,2477 | 2303 | 66991 | Noninflammatory disorders<br>of ovary, fallopian tube, and<br>broad ligament | genitourinary        |
| 185   | PRS_PC1 | -0,031 | 0,026 | 0,970 | 0,2490 | 1590 | 67704 | Cancer of prostate                                                           | neoplasms            |
| 379.5 | PRS_PC1 | 0,077  | 0,067 | 1,080 | 0,2539 | 229  | 69065 | Disorders of iris and ciliary<br>body                                        | sense organs         |
| 250   | PRS_PC1 | -0,015 | 0,014 | 0,985 | 0,2550 | 6330 | 62964 | Diabetes mellitus                                                            | endocrine/metabolic  |
| 427   | PRS_PC1 | 0,015  | 0,013 | 1,015 | 0,2554 | 6648 | 62646 | Cardiac dysrhythmias                                                         | circulatory system   |
| 375   | PRS_PC1 | 0,019  | 0,017 | 1,019 | 0,2573 | 4132 | 65162 | Disorders of lacrimal<br>system                                              | sense organs         |
| 550.4 | PRS_PC1 | -0,030 | 0,027 | 0,970 | 0,2596 | 1506 | 67788 | Umbilical hernia                                                             | digestive            |
| 707.1 | PRS_PC1 | 0,044  | 0,039 | 1,045 | 0,2641 | 675  | 68619 | Decubitus ulcer                                                              | dermatologic         |
| 256   | PRS_PC1 | 0,052  | 0,048 | 1,054 | 0,2703 | 465  | 68829 | Ovarian dysfunction                                                          | endocrine/metabolic  |

|       |         |        |       |       |        |       |                                                 |                     |
|-------|---------|--------|-------|-------|--------|-------|-------------------------------------------------|---------------------|
|       |         |        |       |       |        |       | Breast conditions,<br>congenital or relating to |                     |
| 612   | PRS_PC1 | 0,047  | 0,043 | 1,048 | 0,2730 | 576   | 68718 hormones                                  | genitourinary       |
| 381.1 | PRS_PC1 | -0,017 | 0,016 | 0,983 | 0,2739 | 4497  | 64797 Otitis media                              | sense organs        |
| 694.1 | PRS_PC1 | 0,066  | 0,061 | 1,068 | 0,2816 | 281   | 69013 Vitiligo                                  | dermatologic        |
|       |         |        |       |       |        |       | Dermatophytosis /                               |                     |
| 110   | PRS_PC1 | 0,011  | 0,010 | 1,011 | 0,2820 | 11585 | 57709 Dermatophytosis                           | infectious diseases |
|       |         |        |       |       |        |       | Cancer of urinary organs                        |                     |
| 189   | PRS_PC1 | -0,039 | 0,037 | 0,961 | 0,2841 | 776   | 68518 (incl. kidney and bladder)                | neoplasms           |
|       |         |        |       |       |        |       | Phlebitis and                                   |                     |
| 451   | PRS_PC1 | 0,019  | 0,018 | 1,019 | 0,2858 | 3590  | 65704 thrombophlebitis                          | circulatory system  |
| 54    | PRS_PC1 | 0,029  | 0,027 | 1,029 | 0,2865 | 1486  | 67808 Herpes simplex                            | infectious diseases |
|       |         |        |       |       |        |       | Peritonitis and                                 |                     |
| 567   | PRS_PC1 | 0,047  | 0,044 | 1,048 | 0,2866 | 529   | 68765 retroperitoneal infections                | digestive           |
| 008.6 | PRS_PC1 | 0,028  | 0,026 | 1,028 | 0,2883 | 1543  | 67751 Viral Enteritis                           | infectious diseases |
| 110.1 | PRS_PC1 | 0,011  | 0,011 | 1,012 | 0,2948 | 10367 | 58927 Dermatophytosis                           | infectious diseases |
| 78    | PRS_PC1 | -0,015 | 0,014 | 0,985 | 0,2961 | 5489  | 63805 Viral warts & HPV                         | infectious diseases |
| 585.2 | PRS_PC1 | -0,043 | 0,041 | 0,958 | 0,2979 | 618   | 68676 Renal failure NOS                         | genitourinary       |
|       |         |        |       |       |        |       | Urethritis and urethral                         |                     |
| 592.2 | PRS_PC1 | 0,061  | 0,059 | 1,063 | 0,3001 | 301   | 68993 syndrome                                  | genitourinary       |
|       |         |        |       |       |        |       | Other acquired deformities                      |                     |
| 736   | PRS_PC1 | -0,033 | 0,032 | 0,968 | 0,3048 | 1035  | 68259 of limbs                                  | musculoskeletal     |
|       |         |        |       |       |        |       | Cervical intraepithelial                        |                     |
|       |         |        |       |       |        |       | neoplasia [CIN] [Cervical                       |                     |
| 180.3 | PRS_PC1 | 0,021  | 0,021 | 1,021 | 0,3093 | 2681  | 66613 dysplasia]                                | neoplasms           |
| 250.2 | PRS_PC1 | -0,014 | 0,014 | 0,986 | 0,3141 | 6165  | 63129 Type 2 diabetes                           | endocrine/metabolic |
|       |         |        |       |       |        |       | Malignant neoplasm of                           |                     |
|       |         |        |       |       |        |       | rectum, rectosigmoid                            |                     |
| 153.3 | PRS_PC1 | 0,049  | 0,048 | 1,050 | 0,3142 | 448   | 68846 junction, and anus                        | neoplasms           |
| 079.2 | PRS_PC1 | -0,037 | 0,036 | 0,964 | 0,3149 | 785   | 68509 Infectious mononucleosis                  | infectious diseases |

|        |         |        |       |       |        |       |                                                                              |                         |
|--------|---------|--------|-------|-------|--------|-------|------------------------------------------------------------------------------|-------------------------|
| 728.7  | PRS_PC1 | -0,013 | 0,013 | 0,987 | 0,3167 | 6982  | 62312 Fasciitis                                                              | musculoskeletal         |
| 165    | PRS_PC1 | 0,049  | 0,049 | 1,050 | 0,3177 | 430   | 68864 Cancer within the<br>respiratory system                                | neoplasms               |
| 645    | PRS_PC1 | 0,072  | 0,073 | 1,075 | 0,3220 | 208   | 69086 Late pregnancy and failed<br>induction                                 | pregnancy complications |
| 366.2  | PRS_PC1 | -0,017 | 0,017 | 0,983 | 0,3259 | 3944  | 65350 Senile cataract                                                        | sense organs            |
| 530.11 | PRS_PC1 | -0,010 | 0,010 | 0,990 | 0,3267 | 13296 | 55998 GERD                                                                   | digestive               |
| 317    | PRS_PC1 | 0,055  | 0,056 | 1,057 | 0,3282 | 326   | 68968 Alcohol-related disorders                                              | mental disorders        |
| 317.1  | PRS_PC1 | 0,055  | 0,056 | 1,057 | 0,3282 | 326   | 68968 Alcoholism                                                             | mental disorders        |
| 317.11 | PRS_PC1 | 0,055  | 0,056 | 1,057 | 0,3282 | 326   | 68968 Alcoholic liver damage                                                 | mental disorders        |
| 785    | PRS_PC1 | -0,017 | 0,017 | 0,983 | 0,3284 | 3681  | 65613 Abdominal pain                                                         | symptoms                |
| 732    | PRS_PC1 | 0,058  | 0,059 | 1,060 | 0,3297 | 293   | 69001 Osteochondropathies                                                    | musculoskeletal         |
| 613    | PRS_PC1 | 0,016  | 0,016 | 1,016 | 0,3297 | 4388  | 64906 Other nonmalignant breast<br>conditions                                | genitourinary           |
| 479    | PRS_PC1 | 0,050  | 0,051 | 1,051 | 0,3308 | 395   | 68899 Other upper respiratory<br>disease                                     | respiratory             |
| 592.1  | PRS_PC1 | 0,015  | 0,015 | 1,015 | 0,3372 | 5102  | 64192 Cystitis                                                               | genitourinary           |
| 480.1  | PRS_PC1 | 0,058  | 0,061 | 1,060 | 0,3390 | 279   | 69015 Bacterial pneumonia                                                    | respiratory             |
| 555    | PRS_PC1 | 0,026  | 0,027 | 1,026 | 0,3391 | 1467  | 67827 Inflammatory bowel<br>disease and other<br>gastroenteritis and colitis | digestive               |
| 594.8  | PRS_PC1 | 0,025  | 0,027 | 1,026 | 0,3419 | 1487  | 67807 Renal colic                                                            | genitourinary           |
| 371.1  | PRS_PC1 | -0,034 | 0,036 | 0,967 | 0,3460 | 820   | 68474 Uveitis, noninfectious or<br>NOS                                       | sense organs            |
| 596.5  | PRS_PC1 | 0,025  | 0,027 | 1,026 | 0,3482 | 1432  | 67862 Functional disorders of<br>bladder                                     | genitourinary           |
| 379    | PRS_PC1 | 0,016  | 0,017 | 1,016 | 0,3485 | 3670  | 65624 Other disorders of eye                                                 | sense organs            |
| 284    | PRS_PC1 | -0,061 | 0,066 | 0,941 | 0,3536 | 241   | 69053 Aplastic anemia                                                        | hematopoietic           |
| 290.16 | PRS_PC1 | 0,063  | 0,068 | 1,065 | 0,3578 | 226   | 69068 Vascular dementia                                                      | mental disorders        |
| 550    | PRS_PC1 | 0,009  | 0,009 | 1,009 | 0,3596 | 15588 | 53706 Abdominal hernia                                                       | digestive               |

|       |         |        |       |       |        |      |       |                                                       |                      |
|-------|---------|--------|-------|-------|--------|------|-------|-------------------------------------------------------|----------------------|
| 483   | PRS_PC1 | 0,023  | 0,025 | 1,023 | 0,3617 | 1822 | 67472 | Acute bronchitis and bronchiolitis                    | respiratory          |
| 701.5 | PRS_PC1 | -0,043 | 0,047 | 0,958 | 0,3671 | 464  | 68830 | Abnormal granulation tissue                           | dermatologic         |
| 715   | PRS_PC1 | 0,026  | 0,028 | 1,026 | 0,3675 | 1311 | 67983 | Other inflammatory spondylopathies                    | musculoskeletal      |
| 184   | PRS_PC1 | -0,050 | 0,056 | 0,952 | 0,3732 | 339  | 68955 | Cancer of other female genital organs                 | neoplasms            |
| 703   | PRS_PC1 | -0,016 | 0,018 | 0,984 | 0,3732 | 3524 | 65770 | Diseases of nail, NOS                                 | dermatologic         |
| 379.2 | PRS_PC1 | 0,017  | 0,019 | 1,017 | 0,3735 | 3029 | 66265 | Disorders of vitreous body                            | sense organs         |
| 751.1 | PRS_PC1 | -0,054 | 0,061 | 0,948 | 0,3738 | 283  | 69011 | Congenital anomalies of genital organs                | congenital anomalies |
| 529   | PRS_PC1 | -0,030 | 0,033 | 0,971 | 0,3752 | 937  | 68357 | Diseases and other conditions of the tongue           | digestive            |
| 615   | PRS_PC1 | -0,021 | 0,024 | 0,979 | 0,3804 | 1831 | 67463 | Endometriosis                                         | genitourinary        |
| 939   | PRS_PC1 | -0,012 | 0,014 | 0,988 | 0,3889 | 5735 | 63559 | Atopic/contact dermatitis due to other or unspecified | dermatologic         |
| 420.3 | PRS_PC1 | -0,060 | 0,070 | 0,942 | 0,3920 | 211  | 69083 | Endocarditis                                          | circulatory system   |
| 362   | PRS_PC1 | -0,015 | 0,017 | 0,985 | 0,3955 | 3688 | 65606 | Other retinal disorders                               | sense organs         |
| 134.1 | PRS_PC1 | 0,054  | 0,063 | 1,055 | 0,3972 | 259  | 69035 | Intestinal helminthiases                              | infectious diseases  |
| 608   | PRS_PC1 | -0,016 | 0,019 | 0,984 | 0,3976 | 3012 | 66282 | Other disorders of male genital organs                | genitourinary        |
| 182   | PRS_PC1 | -0,048 | 0,057 | 0,953 | 0,3982 | 327  | 68967 | Malignant neoplasm of uterus                          | neoplasms            |
| 352   | PRS_PC1 | 0,021  | 0,025 | 1,021 | 0,4042 | 1705 | 67589 | Disorders of other cranial nerves                     | neurological         |
| 334   | PRS_PC1 | -0,041 | 0,049 | 0,960 | 0,4055 | 436  | 68858 | Degenerative disease of the spinal cord               | neurological         |
| 8     | PRS_PC1 | -0,011 | 0,014 | 0,989 | 0,4078 | 6062 | 63232 | Intestinal infection                                  | infectious diseases  |

|        |         |        |       |       |        |       |       |                                                           |                      |
|--------|---------|--------|-------|-------|--------|-------|-------|-----------------------------------------------------------|----------------------|
| 378    | PRS_PC1 | -0,048 | 0,058 | 0,953 | 0,4099 | 309   | 68985 | Strabismus and other disorders of binocular eye movements | sense organs         |
| 521    | PRS_PC1 | -0,029 | 0,035 | 0,971 | 0,4110 | 831   | 68463 | Diseases of hard tissues of teeth                         | digestive            |
| 521.1  | PRS_PC1 | -0,029 | 0,035 | 0,971 | 0,4110 | 831   | 68463 | Dental caries                                             | digestive            |
| 715.2  | PRS_PC1 | 0,046  | 0,058 | 1,048 | 0,4218 | 311   | 68983 | Ankylosing spondylitis                                    | musculoskeletal      |
| 442    | PRS_PC1 | -0,052 | 0,065 | 0,950 | 0,4248 | 249   | 69045 | Other aneurysm                                            | circulatory system   |
| 686    | PRS_PC1 | 0,012  | 0,016 | 1,012 | 0,4253 | 4674  | 64620 | Other local infections of skin and subcutaneous tissue    | dermatologic         |
| 531    | PRS_PC1 | 0,013  | 0,017 | 1,014 | 0,4278 | 3849  | 65445 | Peptic ulcer (excl. esophageal)                           | digestive            |
| 443    | PRS_PC1 | 0,016  | 0,021 | 1,016 | 0,4342 | 2564  | 66730 | Peripheral vascular disease                               | circulatory system   |
| 443.8  | PRS_PC1 | 0,016  | 0,021 | 1,016 | 0,4342 | 2564  | 66730 | Other specified peripheral vascular diseases              | circulatory system   |
| 747.1  | PRS_PC1 | 0,036  | 0,047 | 1,037 | 0,4367 | 479   | 68815 | Cardiac congenital anomalies                              | congenital anomalies |
| 352.1  | PRS_PC1 | 0,027  | 0,035 | 1,027 | 0,4392 | 854   | 68440 | Trigeminal nerve disorders [CN5]                          | neurological         |
| 364    | PRS_PC1 | 0,028  | 0,037 | 1,029 | 0,4403 | 772   | 68522 | Corneal opacity and other disorders of cornea             | sense organs         |
| 411.9  | PRS_PC1 | -0,028 | 0,037 | 0,972 | 0,4452 | 760   | 68534 | Other acute and subacute forms of ischemic heart disease  | circulatory system   |
| 174.11 | PRS_PC1 | -0,016 | 0,022 | 0,984 | 0,4461 | 2400  | 66894 | Malignant neoplasm of female breast                       | neoplasms            |
| 530.1  | PRS_PC1 | -0,007 | 0,009 | 0,993 | 0,4462 | 14770 | 54524 | Esophagitis, GERD and related diseases                    | digestive            |

|        |         |        |       |       |        |       |                                 |                      |
|--------|---------|--------|-------|-------|--------|-------|---------------------------------|----------------------|
|        |         |        |       |       |        |       | Other disorders of middle       |                      |
| 385    | PRS_PC1 | 0,043  | 0,057 | 1,044 | 0,4469 | 325   | 68969 ear and mastoid           | sense organs         |
| 531.3  | PRS_PC1 | 0,018  | 0,023 | 1,018 | 0,4479 | 1956  | 67338 Duodenal ulcer            | digestive            |
| 599.1  | PRS_PC1 | -0,024 | 0,032 | 0,976 | 0,4496 | 1016  | 68278 Urinary obstruction       | genitourinary        |
|        |         |        |       |       |        |       | Cervical cancer and             |                      |
| 180    | PRS_PC1 | 0,015  | 0,020 | 1,015 | 0,4515 | 2779  | 66515 dysplasia                 | neoplasms            |
|        |         |        |       |       |        |       | Cardiac shunt/ heart septal     |                      |
| 747.11 | PRS_PC1 | 0,050  | 0,066 | 1,051 | 0,4518 | 236   | 69058 defect                    | congenital anomalies |
| 401.1  | PRS_PC1 | -0,006 | 0,008 | 0,994 | 0,4543 | 24744 | 44550 Essential hypertension    | circulatory system   |
| 601.3  | PRS_PC1 | -0,029 | 0,039 | 0,971 | 0,4543 | 717   | 68577 Orchitis and epididymitis | genitourinary        |
| 474.1  | PRS_PC1 | -0,012 | 0,017 | 0,988 | 0,4543 | 4105  | 65189 Acute tonsillitis         | respiratory          |
| 360    | PRS_PC1 | 0,035  | 0,046 | 1,035 | 0,4565 | 485   | 68809 Disorders of the globe    | sense organs         |
| 430.2  | PRS_PC1 | -0,044 | 0,059 | 0,957 | 0,4568 | 303   | 68991 Intracerebral hemorrhage  | circulatory system   |
|        |         |        |       |       |        |       | Congenital deformities of       |                      |
| 755.1  | PRS_PC1 | 0,043  | 0,057 | 1,043 | 0,4582 | 315   | 68979 feet                      | congenital anomalies |
|        |         |        |       |       |        |       | Rheumatic disease of the        |                      |
| 394    | PRS_PC1 | 0,036  | 0,049 | 1,037 | 0,4616 | 436   | 68858 heart valves              | circulatory system   |
| 366    | PRS_PC1 | -0,009 | 0,012 | 0,991 | 0,4656 | 8637  | 60657 Cataract                  | sense organs         |
| 153.2  | PRS_PC1 | -0,029 | 0,040 | 0,971 | 0,4661 | 659   | 68635 Colon cancer              | neoplasms            |
| 189.2  | PRS_PC1 | -0,033 | 0,046 | 0,967 | 0,4664 | 506   | 68788 Cancer of bladder         | neoplasms            |
| 550.2  | PRS_PC1 | 0,009  | 0,012 | 1,009 | 0,4670 | 8801  | 60493 Diaphragmatic hernia      | digestive            |
|        |         |        |       |       |        |       | Other disorders of bone and     |                      |
| 733    | PRS_PC1 | 0,019  | 0,026 | 1,019 | 0,4698 | 1571  | 67723 cartilage                 | musculoskeletal      |
|        |         |        |       |       |        |       | Other infectious and            |                      |
| 136    | PRS_PC1 | 0,046  | 0,064 | 1,047 | 0,4731 | 255   | 69039 parasitic diseases        | infectious diseases  |
| 695.7  | PRS_PC1 | 0,023  | 0,032 | 1,023 | 0,4734 | 1042  | 68252 Prurigo and Lichen        | dermatologic         |
| 401    | PRS_PC1 | -0,006 | 0,008 | 0,994 | 0,4749 | 24781 | 44513 Hypertension              | circulatory system   |
| 174    | PRS_PC1 | -0,014 | 0,020 | 0,986 | 0,4766 | 2781  | 66513 Breast cancer             | neoplasms            |
|        |         |        |       |       |        |       | Other disorders of stomach      |                      |
| 537    | PRS_PC1 | -0,014 | 0,019 | 0,986 | 0,4826 | 2870  | 66424 and duodenum              | digestive            |



|        |         |        |       |       |        |       |                                     |                         |
|--------|---------|--------|-------|-------|--------|-------|-------------------------------------|-------------------------|
|        |         |        |       |       |        |       | Disorders of mineral                |                         |
| 275    | PRS_PC1 | -0,021 | 0,030 | 0,979 | 0,4867 | 1146  | 68148 metabolism                    | endocrine/metabolic     |
| 289.4  | PRS_PC1 | -0,038 | 0,056 | 0,962 | 0,4900 | 334   | 68960 Lymphadenitis                 | hematopoietic           |
|        |         |        |       |       |        |       | Acute laryngitis and                |                         |
| 465.4  | PRS_PC1 | -0,019 | 0,028 | 0,981 | 0,4927 | 1417  | 67877 tracheitis                    | respiratory             |
| 530    | PRS_PC1 | -0,006 | 0,009 | 0,994 | 0,4933 | 14867 | 54427 Diseases of esophagus         | digestive               |
| 535    | PRS_PC1 | -0,007 | 0,011 | 0,993 | 0,4938 | 10254 | 59040 Gastritis and duodenitis      | digestive               |
| 041.2  | PRS_PC1 | -0,031 | 0,045 | 0,969 | 0,4942 | 507   | 68787 Streptococcus infection       | infectious diseases     |
| 420    | PRS_PC1 | -0,025 | 0,037 | 0,975 | 0,4946 | 758   | 68536 Carditis                      | circulatory system      |
| 634.3  | PRS_PC1 | -0,037 | 0,054 | 0,964 | 0,4960 | 354   | 68940 Ectopic pregnancy             | pregnancy complications |
| 496.3  | PRS_PC1 | 0,023  | 0,033 | 1,023 | 0,4975 | 951   | 68343 Bronchiectasis                | respiratory             |
|        |         |        |       |       |        |       | Pelvic inflammatory disease         |                         |
| 614.3  | PRS_PC1 | -0,046 | 0,068 | 0,955 | 0,4987 | 227   | 69067 (PID)                         | genitourinary           |
|        |         |        |       |       |        |       | Empyema and                         |                         |
| 506    | PRS_PC1 | -0,028 | 0,041 | 0,973 | 0,5023 | 620   | 68674 pneumothorax                  | respiratory             |
| 174.1  | PRS_PC1 | -0,013 | 0,020 | 0,987 | 0,5052 | 2766  | 66528 Breast cancer [female]        | neoplasms               |
| 204    | PRS_PC1 | -0,036 | 0,057 | 0,964 | 0,5228 | 324   | 68970 Leukemia                      | neoplasms               |
|        |         |        |       |       |        |       |                                     |                         |
| 614.51 | PRS_PC1 | -0,030 | 0,048 | 0,970 | 0,5303 | 456   | 68838 Cervicitis and endocervicitis | genitourinary           |
| 008.5  | PRS_PC1 | 0,036  | 0,058 | 1,037 | 0,5329 | 303   | 68991 Bacterial enteritis           | infectious diseases     |
|        |         |        |       |       |        |       | Nonrheumatic aortic valve           |                         |
| 395.2  | PRS_PC1 | 0,019  | 0,031 | 1,019 | 0,5336 | 1123  | 68171 disorders                     | circulatory system      |
| 448    | PRS_PC1 | 0,023  | 0,038 | 1,023 | 0,5467 | 720   | 68574 Disease of capillaries        | circulatory system      |
| 760    | PRS_PC1 | 0,005  | 0,009 | 1,005 | 0,5499 | 18320 | 50974 Back pain                     | symptoms                |
| 376    | PRS_PC1 | -0,035 | 0,058 | 0,966 | 0,5517 | 307   | 68987 Disorders of the orbit        | sense organs            |
| 732.1  | PRS_PC1 | 0,039  | 0,065 | 1,040 | 0,5518 | 241   | 69053 Juvenile osteochondrosis      | musculoskeletal         |
| 626.8  | PRS_PC1 | -0,020 | 0,033 | 0,981 | 0,5581 | 950   | 68344 Infertility, female           | genitourinary           |
| 600    | PRS_PC1 | 0,009  | 0,016 | 1,009 | 0,5699 | 5582  | 63712 Hyperplasia of prostate       | genitourinary           |
| 112    | PRS_PC1 | 0,011  | 0,020 | 1,011 | 0,5718 | 2886  | 66408 Candidiasis                   | infectious diseases     |
| 110.2  | PRS_PC1 | 0,014  | 0,024 | 1,014 | 0,5770 | 1789  | 67505 Dermatomyces                  | infectious diseases     |

|       |         |        |       |       |        |      |       |                            |                         |
|-------|---------|--------|-------|-------|--------|------|-------|----------------------------|-------------------------|
| 305.2 | PRS_PC1 | 0,038  | 0,069 | 1,039 | 0,5779 | 218  | 69076 | Eating disorder            | mental disorders        |
|       |         |        |       |       |        |      |       | Elevated white blood cell  |                         |
| 288.2 | PRS_PC1 | 0,032  | 0,058 | 1,032 | 0,5842 | 310  | 68984 | count                      | hematopoietic           |
|       |         |        |       |       |        |      |       | Gout and other crystal     |                         |
| 274   | PRS_PC1 | 0,009  | 0,017 | 1,009 | 0,5851 | 3898 | 65396 | arthropathies              | endocrine/metabolic     |
| 274.1 | PRS_PC1 | 0,009  | 0,017 | 1,009 | 0,5851 | 3898 | 65396 | Gout                       | endocrine/metabolic     |
|       |         |        |       |       |        |      |       | Cancer of kidney and renal |                         |
| 189.1 | PRS_PC1 | -0,034 | 0,062 | 0,967 | 0,5870 | 269  | 69025 | pelvis                     | neoplasms               |
|       |         |        |       |       |        |      |       | Other venous embolism and  |                         |
| 452   | PRS_PC1 | -0,033 | 0,061 | 0,968 | 0,5876 | 281  | 69013 | thrombosis                 | circulatory system      |
|       |         |        |       |       |        |      |       | Chronic dermatitis due to  |                         |
| 938.2 | PRS_PC1 | -0,008 | 0,014 | 0,992 | 0,5897 | 5892 | 63402 | solar radiation            | dermatologic            |
| 53    | PRS_PC1 | -0,008 | 0,015 | 0,992 | 0,5961 | 5197 | 64097 | Herpes zoster              | infectious diseases     |
|       |         |        |       |       |        |      |       | Hemorrhage during          |                         |
|       |         |        |       |       |        |      |       | pregnancy; childbirth and  |                         |
| 635   | PRS_PC1 | 0,025  | 0,047 | 1,025 | 0,5975 | 505  | 68789 | postpartum                 | pregnancy complications |
|       |         |        |       |       |        |      |       | Cardiac and circulatory    |                         |
| 747   | PRS_PC1 | 0,023  | 0,043 | 1,023 | 0,5977 | 568  | 68726 | congenital anomalies       | congenital anomalies    |
|       |         |        |       |       |        |      |       | Late effects of            |                         |
| 433.8 | PRS_PC1 | 0,026  | 0,050 | 1,027 | 0,6001 | 416  | 68878 | cerebrovascular disease    | circulatory system      |
|       |         |        |       |       |        |      |       | Pruritus and related       |                         |
| 698   | PRS_PC1 | -0,009 | 0,017 | 0,991 | 0,6031 | 3811 | 65483 | conditions                 | dermatologic            |
|       |         |        |       |       |        |      |       | Abnormal findings on       |                         |
|       |         |        |       |       |        |      |       | mammogram or breast        |                         |
| 611   | PRS_PC1 | 0,008  | 0,016 | 1,008 | 0,6061 | 4862 | 64432 | exam                       | genitourinary           |
| 611.3 | PRS_PC1 | 0,008  | 0,016 | 1,008 | 0,6061 | 4862 | 64432 | Lump or mass in breast     | genitourinary           |
| 555.2 | PRS_PC1 | 0,016  | 0,031 | 1,016 | 0,6102 | 1093 | 68201 | Ulcerative colitis         | digestive               |
|       |         |        |       |       |        |      |       | Purpura and other          |                         |
| 287   | PRS_PC1 | 0,017  | 0,034 | 1,018 | 0,6118 | 886  | 68408 | hemorrhagic conditions     | hematopoietic           |

|        |         |        |       |       |        |      |       |                             |                      |
|--------|---------|--------|-------|-------|--------|------|-------|-----------------------------|----------------------|
|        |         |        |       |       |        |      |       | Diseases of white blood     |                      |
| 288    | PRS_PC1 | 0,029  | 0,057 | 1,029 | 0,6129 | 318  | 68976 | cells                       | hematopoietic        |
| 430.1  | PRS_PC1 | -0,030 | 0,059 | 0,971 | 0,6168 | 296  | 68998 | Subarachnoid hemorrhage     | circulatory system   |
|        |         |        |       |       |        |      |       | Congenital anomalies of the |                      |
| 757    | PRS_PC1 | -0,022 | 0,045 | 0,978 | 0,6219 | 516  | 68778 | integument                  | congenital anomalies |
| 332    | PRS_PC1 | 0,022  | 0,045 | 1,022 | 0,6234 | 528  | 68766 | Parkinson's disease         | neurological         |
|        |         |        |       |       |        |      |       | Nerve root and plexus       |                      |
| 353    | PRS_PC1 | -0,013 | 0,026 | 0,988 | 0,6243 | 1626 | 67668 | disorders                   | neurological         |
|        |         |        |       |       |        |      |       | Cardiac arrest and          |                      |
| 427.4  | PRS_PC1 | -0,025 | 0,052 | 0,975 | 0,6297 | 393  | 68901 | ventricular fibrillation    | circulatory system   |
| 427.42 | PRS_PC1 | -0,025 | 0,052 | 0,975 | 0,6297 | 393  | 68901 | Cardiac arrest              | circulatory system   |
|        |         |        |       |       |        |      |       | Irregular menstrual         |                      |
| 626.1  | PRS_PC1 | 0,018  | 0,038 | 1,018 | 0,6333 | 729  | 68565 | cycle/bleeding              | genitourinary        |
|        |         |        |       |       |        |      |       | Absent or infrequent        |                      |
| 626.11 | PRS_PC1 | 0,018  | 0,038 | 1,018 | 0,6333 | 729  | 68565 | menstruation                | genitourinary        |
|        |         |        |       |       |        |      |       | Other diseases of blood and |                      |
| 289    | PRS_PC1 | 0,021  | 0,043 | 1,021 | 0,6357 | 553  | 68741 | blood-forming organs        | hematopoietic        |
| 286    | PRS_PC1 | 0,021  | 0,044 | 1,021 | 0,6371 | 536  | 68758 | Coagulation defects         | hematopoietic        |
| 471    | PRS_PC1 | 0,012  | 0,026 | 1,012 | 0,6396 | 1520 | 67774 | Nasal polyps                | respiratory          |
|        |         |        |       |       |        |      |       | Chronic tonsillitis and     |                      |
| 474.2  | PRS_PC1 | -0,025 | 0,054 | 0,975 | 0,6436 | 351  | 68943 | adenoiditis                 | respiratory          |
|        |         |        |       |       |        |      |       | Dermatitis due to solar     |                      |
| 938    | PRS_PC1 | -0,007 | 0,014 | 0,994 | 0,6437 | 6014 | 63280 | radiation                   | dermatologic         |
|        |         |        |       |       |        |      |       | Vitamin B-complex           |                      |
| 261.2  | PRS_PC1 | 0,018  | 0,038 | 1,018 | 0,6468 | 716  | 68578 | deficiencies                | endocrine/metabolic  |
|        |         |        |       |       |        |      |       | Inflammatory diseases of    |                      |
| 601    | PRS_PC1 | 0,011  | 0,025 | 1,011 | 0,6520 | 1783 | 67511 | prostate                    | genitourinary        |
|        |         |        |       |       |        |      |       | Suppurative and unspecified |                      |
| 381.11 | PRS_PC1 | -0,008 | 0,019 | 0,992 | 0,6531 | 3128 | 66166 | otitis media                | sense organs         |
| 132    | PRS_PC1 | 0,015  | 0,034 | 1,015 | 0,6532 | 934  | 68360 | Infestation (lice, mites)   | infectious diseases  |

|        |         |        |       |       |        |       |       |                                              |                    |
|--------|---------|--------|-------|-------|--------|-------|-------|----------------------------------------------|--------------------|
| 562    | PRS_PC1 | 0,005  | 0,011 | 1,005 | 0,6570 | 10476 | 58818 | Diverticulosis and diverticulitis            | digestive          |
| 562.1  | PRS_PC1 | 0,005  | 0,011 | 1,005 | 0,6570 | 10476 | 58818 | Diverticulosis                               | digestive          |
|        |         |        |       |       |        |       |       | Degenerative skin conditions and other       |                    |
| 702    | PRS_PC1 | -0,005 | 0,011 | 0,995 | 0,6603 | 9557  | 59737 | dermatoses                                   | dermatologic       |
| 702.2  | PRS_PC1 | -0,005 | 0,011 | 0,995 | 0,6603 | 9557  | 59737 | Seborrheic keratosis                         | dermatologic       |
|        |         |        |       |       |        |       |       | Polyp of female genital organs               | genitourinary      |
| 622    | PRS_PC1 | -0,008 | 0,019 | 0,992 | 0,6613 | 3278  | 66016 | Polyp of corpus uteri                        | genitourinary      |
| 622.1  | PRS_PC1 | -0,008 | 0,019 | 0,992 | 0,6613 | 3278  | 66016 | Polyp of corpus uteri                        | genitourinary      |
| 371.3  | PRS_PC1 | 0,011  | 0,026 | 1,011 | 0,6656 | 1560  | 67734 | Inflammation of eyelids                      | sense organs       |
| 686.3  | PRS_PC1 | -0,022 | 0,051 | 0,978 | 0,6657 | 396   | 68898 | Pilonidal cyst                               | dermatologic       |
|        |         |        |       |       |        |       |       | Other specified benign                       |                    |
| 610.8  | PRS_PC1 | -0,008 | 0,020 | 0,992 | 0,6710 | 2853  | 66441 | mammary dysplasias                           | genitourinary      |
|        |         |        |       |       |        |       |       | Cholelithiasis and                           |                    |
| 574    | PRS_PC1 | -0,006 | 0,014 | 0,994 | 0,6720 | 6100  | 63194 | cholecystitis                                | digestive          |
| 172.1  | PRS_PC1 | -0,015 | 0,035 | 0,985 | 0,6737 | 841   | 68453 | Melanomas of skin, dx or hx                  | neoplasms          |
| 172.11 | PRS_PC1 | -0,015 | 0,035 | 0,985 | 0,6737 | 841   | 68453 | Melanomas of skin                            | neoplasms          |
| 374    | PRS_PC1 | -0,009 | 0,021 | 0,991 | 0,6740 | 2560  | 66734 | Other disorders of eyelids                   | sense organs       |
| 281    | PRS_PC1 | -0,014 | 0,034 | 0,986 | 0,6746 | 896   | 68398 | Other deficiency anemia                      | hematopoietic      |
| 281.1  | PRS_PC1 | -0,014 | 0,034 | 0,986 | 0,6746 | 896   | 68398 | Megaloblastic anemia                         | hematopoietic      |
|        |         |        |       |       |        |       |       | Extrapyramidal disease and abnormal movement |                    |
| 333    | PRS_PC1 | 0,010  | 0,025 | 1,010 | 0,6765 | 1747  | 67547 | disorders                                    | neurological       |
| 172.3  | PRS_PC1 | -0,025 | 0,059 | 0,976 | 0,6782 | 295   | 68999 | Carcinoma in situ of skin                    | neoplasms          |
| 370    | PRS_PC1 | 0,019  | 0,048 | 1,020 | 0,6834 | 457   | 68837 | Keratitis                                    | sense organs       |
| 285    | PRS_PC1 | -0,006 | 0,015 | 0,994 | 0,6845 | 5128  | 64166 | Other anemias                                | hematopoietic      |
| 440    | PRS_PC1 | -0,018 | 0,044 | 0,982 | 0,6887 | 535   | 68759 | Atherosclerosis                              | circulatory system |

|        |         |        |       |       |        |      |       |                                             |                      |
|--------|---------|--------|-------|-------|--------|------|-------|---------------------------------------------|----------------------|
| 189.11 | PRS_PC1 | -0,025 | 0,063 | 0,975 | 0,6932 | 259  | 69035 | Malignant neoplasm of kidney, except pelvis | neoplasms            |
| 574.1  | PRS_PC1 | -0,006 | 0,014 | 0,994 | 0,6971 | 5664 | 63630 | Cholelithiasis                              | digestive            |
| 430    | PRS_PC1 | -0,017 | 0,043 | 0,984 | 0,6995 | 567  | 68727 | Intracranial hemorrhage                     | circulatory system   |
| 751    | PRS_PC1 | 0,015  | 0,039 | 1,015 | 0,7005 | 672  | 68622 | Genitourinary congenital anomalies          | congenital anomalies |
| 574.3  | PRS_PC1 | -0,011 | 0,029 | 0,989 | 0,7005 | 1232 | 68062 | Cholecystitis without cholelithiasis        | digestive            |
| 345    | PRS_PC1 | 0,010  | 0,028 | 1,010 | 0,7109 | 1326 | 67968 | Epilepsy, recurrent seizures, convulsions   | neurological         |
| 281.12 | PRS_PC1 | -0,014 | 0,037 | 0,986 | 0,7132 | 744  | 68550 | Other vitamin B12 deficiency anemia         | hematopoietic        |
| 512    | PRS_PC1 | 0,006  | 0,016 | 1,006 | 0,7147 | 4426 | 64868 | Other symptoms of respiratory system        | respiratory          |
| 242    | PRS_PC1 | 0,010  | 0,028 | 1,010 | 0,7160 | 1349 | 67945 | Thyrototoxicosis with or without goiter     | endocrine/metabolic  |
| 10     | PRS_PC1 | 0,026  | 0,072 | 1,026 | 0,7215 | 202  | 69092 | Tuberculosis                                | infectious diseases  |
| 455    | PRS_PC1 | 0,005  | 0,014 | 1,005 | 0,7231 | 5379 | 63915 | Hemorrhoids                                 | circulatory system   |
| 458    | PRS_PC1 | -0,007 | 0,019 | 0,993 | 0,7246 | 2993 | 66301 | Hypotension                                 | circulatory system   |
| 458.9  | PRS_PC1 | -0,007 | 0,019 | 0,993 | 0,7246 | 2993 | 66301 | Hypotension NOS                             | circulatory system   |
| 447    | PRS_PC1 | 0,016  | 0,044 | 1,016 | 0,7248 | 538  | 68756 | Other disorders of arteries and arterioles  | circulatory system   |
| 531.2  | PRS_PC1 | 0,008  | 0,023 | 1,008 | 0,7275 | 2053 | 67241 | Gastric ulcer                               | digestive            |
| 367.9  | PRS_PC1 | 0,013  | 0,038 | 1,013 | 0,7280 | 715  | 68579 | Blindness and low vision                    | sense organs         |
| 365    | PRS_PC1 | 0,006  | 0,018 | 1,006 | 0,7286 | 3258 | 66036 | Glaucoma                                    | sense organs         |
| 705    | PRS_PC1 | -0,018 | 0,053 | 0,982 | 0,7356 | 372  | 68922 | Disorders of sweat glands                   | dermatologic         |
| 420.2  | PRS_PC1 | -0,015 | 0,044 | 0,985 | 0,7370 | 549  | 68745 | Pericarditis                                | circulatory system   |
| 441    | PRS_PC1 | 0,016  | 0,049 | 1,016 | 0,7432 | 436  | 68858 | Vascular insufficiency of intestine         | circulatory system   |

|        |         |        |       |       |        |      |       |                                                                     |                         |
|--------|---------|--------|-------|-------|--------|------|-------|---------------------------------------------------------------------|-------------------------|
| 433.1  | PRS_PC1 | 0,017  | 0,053 | 1,017 | 0,7470 | 367  | 68927 | Occlusion and stenosis of precerebral arteries                      | circulatory system      |
| 371    | PRS_PC1 | -0,007 | 0,022 | 0,993 | 0,7476 | 2342 | 66952 | Inflammation of the eye                                             | sense organs            |
| 550.3  | PRS_PC1 | 0,020  | 0,063 | 1,020 | 0,7517 | 260  | 69034 | Femoral hernia                                                      | digestive               |
| 465.2  | PRS_PC1 | -0,004 | 0,013 | 0,996 | 0,7589 | 7533 | 61761 | Acute pharyngitis                                                   | respiratory             |
| 721    | PRS_PC1 | 0,004  | 0,012 | 1,004 | 0,7598 | 7725 | 61569 | Spondylosis and allied disorders                                    | musculoskeletal         |
| 41     | PRS_PC1 | 0,008  | 0,027 | 1,008 | 0,7616 | 1493 | 67801 | Bacterial infection NOS                                             | infectious diseases     |
| 286.6  | PRS_PC1 | 0,013  | 0,044 | 1,014 | 0,7621 | 528  | 68766 | Defibrination syndrome                                              | hematopoietic           |
| 681    | PRS_PC1 | -0,004 | 0,012 | 0,996 | 0,7648 | 8114 | 61180 | Superficial cellulitis and abscess                                  | dermatologic            |
| 415    | PRS_PC1 | -0,007 | 0,024 | 0,993 | 0,7653 | 1783 | 67511 | Pulmonary heart disease                                             | circulatory system      |
| 415.1  | PRS_PC1 | -0,007 | 0,025 | 0,993 | 0,7692 | 1765 | 67529 | Acute pulmonary heart disease                                       | circulatory system      |
| 415.11 | PRS_PC1 | -0,007 | 0,025 | 0,993 | 0,7692 | 1765 | 67529 | Pulmonary embolism and infarction, acute                            | circulatory system      |
| 134    | PRS_PC1 | 0,017  | 0,057 | 1,017 | 0,7703 | 318  | 68976 | Helminthiases                                                       | infectious diseases     |
| 635.3  | PRS_PC1 | 0,016  | 0,055 | 1,016 | 0,7753 | 359  | 68935 | Placenta previa and abruptio placenta                               | pregnancy complications |
| 383    | PRS_PC1 | -0,019 | 0,066 | 0,982 | 0,7768 | 239  | 69055 | Otosclerosis                                                        | sense organs            |
| 575.8  | PRS_PC1 | -0,010 | 0,037 | 0,990 | 0,7823 | 763  | 68531 | Other disorders of biliary tract                                    | digestive               |
| 411.3  | PRS_PC1 | 0,004  | 0,014 | 1,004 | 0,7969 | 5951 | 63343 | Angina pectoris                                                     | circulatory system      |
| 642    | PRS_PC1 | -0,015 | 0,059 | 0,985 | 0,7995 | 300  | 68994 | Hypertension complicating pregnancy, childbirth, and the puerperium | pregnancy complications |
| 339    | PRS_PC1 | -0,006 | 0,025 | 0,994 | 0,8006 | 1743 | 67551 | Other headache syndromes                                            | neurological            |
| 585.1  | PRS_PC1 | 0,005  | 0,020 | 1,005 | 0,8027 | 2669 | 66625 | Acute renal failure                                                 | genitourinary           |

|        |         |        |       |       |        |       |       |                                                                         |                      |
|--------|---------|--------|-------|-------|--------|-------|-------|-------------------------------------------------------------------------|----------------------|
|        |         |        |       |       |        |       |       | Disorders of menstruation<br>and other abnormal<br>bleeding from female |                      |
| 626    | PRS_PC1 | -0,006 | 0,026 | 0,994 | 0,8082 | 1634  | 67660 | genital tract                                                           | genitourinary        |
| 70     | PRS_PC1 | -0,015 | 0,064 | 0,985 | 0,8119 | 256   | 69038 | Viral hepatitis                                                         | infectious diseases  |
|        |         |        |       |       |        |       |       | Other and unspecified                                                   |                      |
| 286.7  | PRS_PC1 | 0,010  | 0,045 | 1,010 | 0,8174 | 520   | 68774 | coagulation defects                                                     | hematopoietic        |
| 602    | PRS_PC1 | -0,010 | 0,045 | 0,990 | 0,8198 | 524   | 68770 | Other disorders of prostate                                             | genitourinary        |
| 706.2  | PRS_PC1 | 0,004  | 0,018 | 1,004 | 0,8225 | 3272  | 66022 | Sebaceous cyst                                                          | dermatologic         |
|        |         |        |       |       |        |       |       | Acute upper respiratory<br>infections of multiple or                    |                      |
| 465    | PRS_PC1 | -0,002 | 0,009 | 0,998 | 0,8237 | 21643 | 47651 | unspecified sites                                                       | respiratory          |
| 394.7  | PRS_PC1 | 0,014  | 0,062 | 1,014 | 0,8246 | 270   | 69024 | Disease of tricuspid valve                                              | circulatory system   |
|        |         |        |       |       |        |       |       | Congenital anomalies of the                                             |                      |
| 753    | PRS_PC1 | -0,016 | 0,071 | 0,985 | 0,8270 | 206   | 69088 | eye                                                                     | congenital anomalies |
|        |         |        |       |       |        |       |       | Primary/intrinsic                                                       |                      |
| 425.1  | PRS_PC1 | 0,010  | 0,046 | 1,010 | 0,8332 | 499   | 68795 | cardiomyopathies                                                        | circulatory system   |
|        |         |        |       |       |        |       |       |                                                                         |                      |
| 352.2  | PRS_PC1 | 0,007  | 0,036 | 1,007 | 0,8378 | 800   | 68494 | Facial nerve disorders [CN7]                                            | neurological         |
|        |         |        |       |       |        |       |       | Malignant neoplasm of                                                   |                      |
| 189.21 | PRS_PC1 | -0,014 | 0,070 | 0,986 | 0,8433 | 214   | 69080 | bladder                                                                 | neoplasms            |
| 246    | PRS_PC1 | 0,010  | 0,050 | 1,010 | 0,8438 | 411   | 68883 | Other disorders of thyroid                                              | endocrine/metabolic  |
| 585.3  | PRS_PC1 | -0,003 | 0,015 | 0,997 | 0,8440 | 4872  | 64422 | Chronic renal failure [CKD]                                             | genitourinary        |
|        |         |        |       |       |        |       |       | Inflammatory disease of                                                 |                      |
| 614.5  | PRS_PC1 | 0,006  | 0,030 | 1,006 | 0,8503 | 1194  | 68100 | cervix, vagina, and vulva                                               | genitourinary        |
| 737    | PRS_PC1 | -0,007 | 0,038 | 0,993 | 0,8548 | 729   | 68565 | Curvature of spine                                                      | musculoskeletal      |
|        |         |        |       |       |        |       |       |                                                                         |                      |
| 737.3  | PRS_PC1 | -0,007 | 0,038 | 0,993 | 0,8548 | 729   | 68565 | Kyphoscoliosis and scoliosis                                            | musculoskeletal      |
|        |         |        |       |       |        |       |       | Hypertensive heart and/or                                               |                      |
| 401.2  | PRS_PC1 | 0,009  | 0,049 | 1,009 | 0,8603 | 441   | 68853 | renal disease                                                           | circulatory system   |

|        |         |        |       |       |        |      |                                                                     |                     |
|--------|---------|--------|-------|-------|--------|------|---------------------------------------------------------------------|---------------------|
|        |         |        |       |       |        |      | Osteitis deformans and osteopathies associated with other disorders |                     |
| 731    | PRS_PC1 | 0,012  | 0,069 | 1,012 | 0,8617 | 220  | 69074 classified elsewhere                                          | musculoskeletal     |
| 041.21 | PRS_PC1 | 0,011  | 0,063 | 1,011 | 0,8634 | 267  | 69027 Rheumatic fever / chorea                                      | infectious diseases |
| 696.3  | PRS_PC1 | -0,008 | 0,046 | 0,992 | 0,8639 | 495  | 68799 Pityriasis                                                    | dermatologic        |
| 585    | PRS_PC1 | -0,002 | 0,013 | 0,998 | 0,8639 | 6701 | 62593 Renal failure                                                 | genitourinary       |
|        |         |        |       |       |        |      | Sexual and gender identity disorders                                |                     |
| 302    | PRS_PC1 | -0,007 | 0,041 | 0,993 | 0,8657 | 628  | 68666 disorders                                                     | mental disorders    |
|        |         |        |       |       |        |      | Arterial embolism and thrombosis                                    |                     |
| 444    | PRS_PC1 | -0,010 | 0,057 | 0,991 | 0,8684 | 316  | 68978 thrombosis                                                    | circulatory system  |
| 153    | PRS_PC1 | 0,005  | 0,031 | 1,005 | 0,8719 | 1099 | 68195 Colorectal cancer                                             | neoplasms           |
| 464    | PRS_PC1 | 0,002  | 0,012 | 1,002 | 0,8720 | 8197 | 61097 Acute sinusitis                                               | respiratory         |
|        |         |        |       |       |        |      | Paroxysmal tachycardia, unspecified                                 |                     |
| 427.1  | PRS_PC1 | 0,004  | 0,027 | 1,004 | 0,8762 | 1427 | 67867 unspecified                                                   | circulatory system  |
| 425    | PRS_PC1 | 0,007  | 0,045 | 1,007 | 0,8817 | 510  | 68784 Cardiomyopathy                                                | circulatory system  |
|        |         |        |       |       |        |      | Congestive heart failure; nonhypertensive                           |                     |
| 428    | PRS_PC1 | 0,003  | 0,021 | 1,003 | 0,8895 | 2573 | 66721 nonhypertensive                                               | circulatory system  |
| 428.2  | PRS_PC1 | 0,003  | 0,021 | 1,003 | 0,8895 | 2573 | 66721 Heart failure NOS                                             | circulatory system  |
|        |         |        |       |       |        |      | Other chronic ischemic heart disease, unspecified                   |                     |
| 411.8  | PRS_PC1 | 0,002  | 0,013 | 1,002 | 0,8905 | 7701 | 61593 heart disease, unspecified                                    | circulatory system  |
| 697    | PRS_PC1 | 0,008  | 0,057 | 1,008 | 0,8908 | 321  | 68973 Sarcoidosis                                                   | dermatologic        |
| 300.1  | PRS_PC1 | -0,005 | 0,034 | 0,995 | 0,8913 | 888  | 68406 Anxiety disorder                                              | mental disorders    |
| 300.13 | PRS_PC1 | -0,005 | 0,034 | 0,995 | 0,8913 | 888  | 68406 Phobia                                                        | mental disorders    |
| 344    | PRS_PC1 | 0,008  | 0,057 | 1,008 | 0,8950 | 318  | 68976 Other paralytic syndromes                                     | neurological        |
|        |         |        |       |       |        |      | Other disorders of peritoneum                                       |                     |
| 568    | PRS_PC1 | 0,004  | 0,030 | 1,004 | 0,8977 | 1197 | 68097 peritoneum                                                    | digestive           |
| 575    | PRS_PC1 | 0,004  | 0,028 | 1,004 | 0,8986 | 1362 | 67932 Other biliary tract disease                                   | digestive           |
| 411    | PRS_PC1 | -0,001 | 0,012 | 0,999 | 0,8987 | 9447 | 59847 Ischemic Heart Disease                                        | circulatory system  |
| 340    | PRS_PC1 | -0,002 | 0,015 | 0,998 | 0,8995 | 4747 | 64547 Migraine                                                      | neurological        |



|        |         |        |       |       |        |      |                                   |                     |
|--------|---------|--------|-------|-------|--------|------|-----------------------------------|---------------------|
| 590    | PRS_PC1 | -0,004 | 0,035 | 0,996 | 0,9016 | 843  | 68451 Pyelonephritis              | genitourinary       |
| 165.1  | PRS_PC1 | 0,006  | 0,052 | 1,006 | 0,9038 | 391  | 68903 Cancer of bronchus; lung    | neoplasms           |
| 411.2  | PRS_PC1 | 0,002  | 0,018 | 1,002 | 0,9181 | 3631 | 65663 Myocardial infarction       | circulatory system  |
|        |         |        |       |       |        |      | Erythematosquamous                |                     |
| 690    | PRS_PC1 | 0,002  | 0,019 | 1,002 | 0,9257 | 3130 | 66164 dermatosis                  | dermatologic        |
| 690.1  | PRS_PC1 | 0,002  | 0,019 | 1,002 | 0,9257 | 3130 | 66164 Seborrheic dermatitis       | dermatologic        |
|        |         |        |       |       |        |      | Nonrheumatic mitral valve         |                     |
| 395.1  | PRS_PC1 | -0,003 | 0,031 | 0,997 | 0,9305 | 1066 | 68228 disorders                   | circulatory system  |
|        |         |        |       |       |        |      | Other hypertrophic and            |                     |
| 701    | PRS_PC1 | 0,002  | 0,019 | 1,002 | 0,9323 | 3089 | 66205 atrophic conditions of skin | dermatologic        |
| 577    | PRS_PC1 | 0,003  | 0,037 | 1,003 | 0,9365 | 754  | 68540 Diseases of pancreas        | digestive           |
| 577.1  | PRS_PC1 | 0,003  | 0,037 | 1,003 | 0,9365 | 754  | 68540 Acute pancreatitis          | digestive           |
|        |         |        |       |       |        |      | Disorders of refraction and       |                     |
|        |         |        |       |       |        |      | accommodation; blindness          |                     |
| 367    | PRS_PC1 | 0,001  | 0,021 | 1,001 | 0,9442 | 2387 | 66907 and low vision              | sense organs        |
|        |         |        |       |       |        |      | Diseases of hair and hair         |                     |
| 704    | PRS_PC1 | 0,004  | 0,055 | 1,004 | 0,9443 | 349  | 68945 follicles                   | dermatologic        |
| 594    | PRS_PC1 | -0,001 | 0,020 | 0,999 | 0,9473 | 2781 | 66513 Urinary calculus            | genitourinary       |
| 704.1  | PRS_PC1 | 0,003  | 0,055 | 1,003 | 0,9555 | 338  | 68956 Alopecia                    | dermatologic        |
| 550.5  | PRS_PC1 | 0,001  | 0,027 | 1,001 | 0,9597 | 1436 | 67858 Ventral hernia              | digestive           |
| 395    | PRS_PC1 | -0,001 | 0,022 | 0,999 | 0,9625 | 2196 | 67098 Heart valve disorders       | circulatory system  |
|        |         |        |       |       |        |      | Decreased white blood cell        |                     |
| 288.1  | PRS_PC1 | -0,001 | 0,031 | 0,999 | 0,9628 | 1125 | 68169 count                       | hematopoietic       |
| 288.11 | PRS_PC1 | -0,001 | 0,031 | 0,999 | 0,9628 | 1125 | 68169 Neutropenia                 | hematopoietic       |
|        |         |        |       |       |        |      | Other disorders of                |                     |
| 277    | PRS_PC1 | -0,002 | 0,050 | 0,998 | 0,9628 | 425  | 68869 metabolism                  | endocrine/metabolic |
| 290.11 | PRS_PC1 | 0,002  | 0,052 | 1,002 | 0,9681 | 388  | 68906 Alzheimer's disease         | mental disorders    |
|        |         |        |       |       |        |      | Inflammatory diseases of          |                     |
| 614    | PRS_PC1 | -0,001 | 0,028 | 0,999 | 0,9747 | 1416 | 67878 female pelvic organs        | genitourinary       |
| 372    | PRS_PC1 | 0,000  | 0,021 | 1,000 | 0,9840 | 2547 | 66747 Disorders of conjunctiva    | sense organs        |

|        |         |        |       |       |        |      |                                                     |                     |
|--------|---------|--------|-------|-------|--------|------|-----------------------------------------------------|---------------------|
| 704.11 | PRS_PC1 | -0,001 | 0,065 | 0,999 | 0,9871 | 249  | 69045 Alopecia Areata                               | dermatologic        |
|        |         |        |       |       |        |      | Other acquired                                      |                     |
| 738    | PRS_PC1 | 0,000  | 0,038 | 1,000 | 0,9921 | 711  | 68583 musculoskeletal deformity                     | musculoskeletal     |
|        |         |        |       |       |        |      | Disorders of fluid,<br>electrolyte, and acid-base   |                     |
| 276    | PRS_PC1 | 0,000  | 0,028 | 1,000 | 0,9948 | 1339 | 67955 balance                                       | endocrine/metabolic |
| 276.5  | PRS_PC1 | 0,000  | 0,028 | 1,000 | 0,9948 | 1339 | 67955 Hypovolemia                                   | endocrine/metabolic |
|        |         |        |       |       |        |      | Hypertensive chronic kidney                         |                     |
| 401.22 | PRS_PC1 | 0,000  | 0,057 | 1,000 | 0,9968 | 317  | 68977 disease                                       | circulatory system  |
|        |         |        |       |       |        |      | Osteomyelitis, periostitis,<br>and other infections |                     |
| 710    | PRS_PC1 | 0,000  | 0,045 | 1,000 | 0,9975 | 507  | 68787 involving bone                                | musculoskeletal     |
| 710.1  | PRS_PC1 | 0,000  | 0,045 | 1,000 | 0,9975 | 507  | 68787 Osteomyelitis                                 | musculoskeletal     |
| 710.19 | PRS_PC1 | 0,000  | 0,045 | 1,000 | 0,9975 | 507  | 68787 Unspecified osteomyelitis                     | musculoskeletal     |
